# Supplementary material for: Identification of alternative splicing associated with clinical features: from pan-cancers to genitourinary tumors
Source: Front Oncol. 2023 Sep 25;13:1249932. doi: 10.3389/fonc.2023.1249932 (PMC10557043; doi:10.3389/fonc.2023.1249932)
Supplement: Supplementary file 4 [file Table_1.xlsx]

## Sheet: tableS1_clinical_variates_with_
Supplemental table S1. Grouping of clinical features in 33 cancer types
Sample ID	Cancer Type	Clinical features	Groups	Number of Samples
TCGA_OR_A5KV	ACC	age_at_initial_pathologic_diagnosis	< 48	37
TCGA_OR_A5K3	ACC	age_at_initial_pathologic_diagnosis	>= 48	42
TCGA_OR_A5JS	ACC	age_at_initial_pathologic_diagnosis	>= 48	42
TCGA_OR_A5JC	ACC	age_at_initial_pathologic_diagnosis	< 48	37
TCGA_P6_A5OG	ACC	age_at_initial_pathologic_diagnosis	< 48	37
TCGA_OR_A5LC	ACC	age_at_initial_pathologic_diagnosis	>= 48	42
TCGA_OR_A5J9	ACC	age_at_initial_pathologic_diagnosis	< 48	37
TCGA_OR_A5JX	ACC	age_at_initial_pathologic_diagnosis	>= 48	42
TCGA_OR_A5LJ	ACC	age_at_initial_pathologic_diagnosis	>= 48	42
TCGA_OR_A5LN	ACC	age_at_initial_pathologic_diagnosis	< 48	37
TCGA_OR_A5K2	ACC	age_at_initial_pathologic_diagnosis	< 48	37
TCGA_OR_A5K5	ACC	age_at_initial_pathologic_diagnosis	>= 48	42
TCGA_OR_A5K0	ACC	age_at_initial_pathologic_diagnosis	>= 48	42
TCGA_OR_A5KW	ACC	age_at_initial_pathologic_diagnosis	>= 48	42
TCGA_OR_A5LA	ACC	age_at_initial_pathologic_diagnosis	>= 48	42
TCGA_OR_A5JE	ACC	age_at_initial_pathologic_diagnosis	< 48	37
TCGA_OR_A5L5	ACC	age_at_initial_pathologic_diagnosis	>= 48	42
TCGA_OR_A5L4	ACC	age_at_initial_pathologic_diagnosis	>= 48	42
TCGA_OR_A5J3	ACC	age_at_initial_pathologic_diagnosis	< 48	37
TCGA_OR_A5LB	ACC	age_at_initial_pathologic_diagnosis	>= 48	42
TCGA_OR_A5JF	ACC	age_at_initial_pathologic_diagnosis	>= 48	42
TCGA_PK_A5H8	ACC	age_at_initial_pathologic_diagnosis	< 48	37
TCGA_OR_A5LP	ACC	age_at_initial_pathologic_diagnosis	< 48	37
TCGA_OR_A5L9	ACC	age_at_initial_pathologic_diagnosis	>= 48	42
TCGA_PK_A5HB	ACC	age_at_initial_pathologic_diagnosis	>= 48	42
TCGA_OR_A5K9	ACC	age_at_initial_pathologic_diagnosis	>= 48	42
TCGA_OR_A5JA	ACC	age_at_initial_pathologic_diagnosis	>= 48	42
TCGA_OR_A5KU	ACC	age_at_initial_pathologic_diagnosis	< 48	37
TCGA_OR_A5J8	ACC	age_at_initial_pathologic_diagnosis	>= 48	42
TCGA_OR_A5LM	ACC	age_at_initial_pathologic_diagnosis	< 48	37
TCGA_OR_A5KZ	ACC	age_at_initial_pathologic_diagnosis	< 48	37
TCGA_OR_A5JO	ACC	age_at_initial_pathologic_diagnosis	< 48	37
TCGA_OR_A5JQ	ACC	age_at_initial_pathologic_diagnosis	< 48	37
TCGA_OR_A5KT	ACC	age_at_initial_pathologic_diagnosis	< 48	37
TCGA_OR_A5K8	ACC	age_at_initial_pathologic_diagnosis	< 48	37
TCGA_OR_A5L3	ACC	age_at_initial_pathologic_diagnosis	>= 48	42
TCGA_OR_A5JK	ACC	age_at_initial_pathologic_diagnosis	>= 48	42
TCGA_OR_A5K1	ACC	age_at_initial_pathologic_diagnosis	>= 48	42
TCGA_OR_A5LR	ACC	age_at_initial_pathologic_diagnosis	< 48	37
TCGA_PA_A5YG	ACC	age_at_initial_pathologic_diagnosis	>= 48	42
TCGA_OR_A5J7	ACC	age_at_initial_pathologic_diagnosis	< 48	37
TCGA_OR_A5JP	ACC	age_at_initial_pathologic_diagnosis	< 48	37
TCGA_OR_A5JV	ACC	age_at_initial_pathologic_diagnosis	>= 48	42
TCGA_OU_A5PI	ACC	age_at_initial_pathologic_diagnosis	>= 48	42
TCGA_PK_A5HA	ACC	age_at_initial_pathologic_diagnosis	>= 48	42
TCGA_OR_A5JG	ACC	age_at_initial_pathologic_diagnosis	>= 48	42
TCGA_OR_A5JY	ACC	age_at_initial_pathologic_diagnosis	>= 48	42
TCGA_OR_A5JM	ACC	age_at_initial_pathologic_diagnosis	< 48	37
TCGA_OR_A5K6	ACC	age_at_initial_pathologic_diagnosis	>= 48	42
TCGA_OR_A5K4	ACC	age_at_initial_pathologic_diagnosis	>= 48	42
TCGA_OR_A5JL	ACC	age_at_initial_pathologic_diagnosis	< 48	37
TCGA_P6_A5OF	ACC	age_at_initial_pathologic_diagnosis	>= 48	42
TCGA_OR_A5LE	ACC	age_at_initial_pathologic_diagnosis	< 48	37
TCGA_OR_A5LK	ACC	age_at_initial_pathologic_diagnosis	>= 48	42
TCGA_OR_A5LO	ACC	age_at_initial_pathologic_diagnosis	>= 48	42
TCGA_OR_A5LD	ACC	age_at_initial_pathologic_diagnosis	>= 48	42
TCGA_OR_A5J6	ACC	age_at_initial_pathologic_diagnosis	< 48	37
TCGA_OR_A5JJ	ACC	age_at_initial_pathologic_diagnosis	>= 48	42
TCGA_OR_A5LT	ACC	age_at_initial_pathologic_diagnosis	>= 48	42
TCGA_OR_A5KY	ACC	age_at_initial_pathologic_diagnosis	< 48	37
TCGA_OR_A5JZ	ACC	age_at_initial_pathologic_diagnosis	>= 48	42
TCGA_OR_A5JD	ACC	age_at_initial_pathologic_diagnosis	>= 48	42
TCGA_OR_A5L6	ACC	age_at_initial_pathologic_diagnosis	>= 48	42
TCGA_OR_A5LS	ACC	age_at_initial_pathologic_diagnosis	< 48	37
TCGA_OR_A5JR	ACC	age_at_initial_pathologic_diagnosis	< 48	37
TCGA_OR_A5J5	ACC	age_at_initial_pathologic_diagnosis	< 48	37
TCGA_OR_A5KX	ACC	age_at_initial_pathologic_diagnosis	< 48	37
TCGA_OR_A5LL	ACC	age_at_initial_pathologic_diagnosis	>= 48	42
TCGA_OR_A5KO	ACC	age_at_initial_pathologic_diagnosis	< 48	37
TCGA_OR_A5JI	ACC	age_at_initial_pathologic_diagnosis	< 48	37
TCGA_OR_A5LG	ACC	age_at_initial_pathologic_diagnosis	< 48	37
TCGA_OR_A5JW	ACC	age_at_initial_pathologic_diagnosis	< 48	37
TCGA_PK_A5H9	ACC	age_at_initial_pathologic_diagnosis	< 48	37
TCGA_OR_A5JB	ACC	age_at_initial_pathologic_diagnosis	>= 48	42
TCGA_OR_A5L8	ACC	age_at_initial_pathologic_diagnosis	< 48	37
TCGA_OR_A5J1	ACC	age_at_initial_pathologic_diagnosis	>= 48	42
TCGA_OR_A5J2	ACC	age_at_initial_pathologic_diagnosis	< 48	37
TCGA_OR_A5JT	ACC	age_at_initial_pathologic_diagnosis	>= 48	42
TCGA_OR_A5LH	ACC	age_at_initial_pathologic_diagnosis	< 48	37
TCGA_OR_A5KV	ACC	invasion_of_tumor_capsule	Invasion of Tumor Capsule Absent	31
TCGA_OR_A5K3	ACC	invasion_of_tumor_capsule	Invasion of Tumor Capsule Present	42
TCGA_OR_A5JS	ACC	invasion_of_tumor_capsule	Invasion of Tumor Capsule Absent	31
TCGA_OR_A5JC	ACC	invasion_of_tumor_capsule	Invasion of Tumor Capsule Absent	31
TCGA_P6_A5OG	ACC	invasion_of_tumor_capsule	Invasion of Tumor Capsule Present	42
TCGA_OR_A5LC	ACC	invasion_of_tumor_capsule	Invasion of Tumor Capsule Present	42
TCGA_OR_A5J9	ACC	invasion_of_tumor_capsule	Invasion of Tumor Capsule Absent	31
TCGA_OR_A5JX	ACC	invasion_of_tumor_capsule	Invasion of Tumor Capsule Present	42
TCGA_OR_A5LJ	ACC	invasion_of_tumor_capsule	Invasion of Tumor Capsule Absent	31
TCGA_OR_A5LN	ACC	invasion_of_tumor_capsule	Invasion of Tumor Capsule Present	42
TCGA_OR_A5K2	ACC	invasion_of_tumor_capsule	Invasion of Tumor Capsule Present	42
TCGA_OR_A5K5	ACC	invasion_of_tumor_capsule	Invasion of Tumor Capsule Present	42
TCGA_OR_A5K0	ACC	invasion_of_tumor_capsule	Invasion of Tumor Capsule Present	42
TCGA_OR_A5LA	ACC	invasion_of_tumor_capsule	Invasion of Tumor Capsule Present	42
TCGA_OR_A5JE	ACC	invasion_of_tumor_capsule	Invasion of Tumor Capsule Present	42
TCGA_OR_A5L5	ACC	invasion_of_tumor_capsule	Invasion of Tumor Capsule Present	42
TCGA_OR_A5L4	ACC	invasion_of_tumor_capsule	Invasion of Tumor Capsule Present	42
TCGA_OR_A5J3	ACC	invasion_of_tumor_capsule	Invasion of Tumor Capsule Absent	31
TCGA_OR_A5LB	ACC	invasion_of_tumor_capsule	Invasion of Tumor Capsule Absent	31
TCGA_OR_A5JF	ACC	invasion_of_tumor_capsule	Invasion of Tumor Capsule Present	42
TCGA_PK_A5H8	ACC	invasion_of_tumor_capsule	Invasion of Tumor Capsule Absent	31
TCGA_OR_A5LP	ACC	invasion_of_tumor_capsule	Invasion of Tumor Capsule Present	42
TCGA_OR_A5L9	ACC	invasion_of_tumor_capsule	Invasion of Tumor Capsule Absent	31
TCGA_OR_A5JA	ACC	invasion_of_tumor_capsule	Invasion of Tumor Capsule Present	42
TCGA_OR_A5KU	ACC	invasion_of_tumor_capsule	Invasion of Tumor Capsule Absent	31
TCGA_OR_A5J8	ACC	invasion_of_tumor_capsule	Invasion of Tumor Capsule Present	42
TCGA_OR_A5LM	ACC	invasion_of_tumor_capsule	Invasion of Tumor Capsule Present	42
TCGA_OR_A5KZ	ACC	invasion_of_tumor_capsule	Invasion of Tumor Capsule Present	42
TCGA_OR_A5JO	ACC	invasion_of_tumor_capsule	Invasion of Tumor Capsule Absent	31
TCGA_OR_A5JQ	ACC	invasion_of_tumor_capsule	Invasion of Tumor Capsule Absent	31
TCGA_OR_A5KT	ACC	invasion_of_tumor_capsule	Invasion of Tumor Capsule Absent	31
TCGA_OR_A5K8	ACC	invasion_of_tumor_capsule	Invasion of Tumor Capsule Present	42
TCGA_OR_A5L3	ACC	invasion_of_tumor_capsule	Invasion of Tumor Capsule Absent	31
TCGA_OR_A5JK	ACC	invasion_of_tumor_capsule	Invasion of Tumor Capsule Present	42
TCGA_OR_A5K1	ACC	invasion_of_tumor_capsule	Invasion of Tumor Capsule Present	42
TCGA_OR_A5LR	ACC	invasion_of_tumor_capsule	Invasion of Tumor Capsule Present	42
TCGA_OR_A5J7	ACC	invasion_of_tumor_capsule	Invasion of Tumor Capsule Present	42
TCGA_OR_A5JP	ACC	invasion_of_tumor_capsule	Invasion of Tumor Capsule Absent	31
TCGA_OR_A5JV	ACC	invasion_of_tumor_capsule	Invasion of Tumor Capsule Absent	31
TCGA_OU_A5PI	ACC	invasion_of_tumor_capsule	Invasion of Tumor Capsule Present	42
TCGA_PK_A5HA	ACC	invasion_of_tumor_capsule	Invasion of Tumor Capsule Present	42
TCGA_OR_A5JG	ACC	invasion_of_tumor_capsule	Invasion of Tumor Capsule Present	42
TCGA_OR_A5JY	ACC	invasion_of_tumor_capsule	Invasion of Tumor Capsule Present	42
TCGA_OR_A5JM	ACC	invasion_of_tumor_capsule	Invasion of Tumor Capsule Present	42
TCGA_OR_A5K6	ACC	invasion_of_tumor_capsule	Invasion of Tumor Capsule Absent	31
TCGA_OR_A5K4	ACC	invasion_of_tumor_capsule	Invasion of Tumor Capsule Absent	31
TCGA_OR_A5JL	ACC	invasion_of_tumor_capsule	Invasion of Tumor Capsule Absent	31
TCGA_OR_A5LE	ACC	invasion_of_tumor_capsule	Invasion of Tumor Capsule Absent	31
TCGA_OR_A5LK	ACC	invasion_of_tumor_capsule	Invasion of Tumor Capsule Absent	31
TCGA_OR_A5LO	ACC	invasion_of_tumor_capsule	Invasion of Tumor Capsule Present	42
TCGA_OR_A5LD	ACC	invasion_of_tumor_capsule	Invasion of Tumor Capsule Absent	31
TCGA_OR_A5J6	ACC	invasion_of_tumor_capsule	Invasion of Tumor Capsule Absent	31
TCGA_OR_A5JJ	ACC	invasion_of_tumor_capsule	Invasion of Tumor Capsule Present	42
TCGA_OR_A5LT	ACC	invasion_of_tumor_capsule	Invasion of Tumor Capsule Present	42
TCGA_OR_A5KY	ACC	invasion_of_tumor_capsule	Invasion of Tumor Capsule Present	42
TCGA_OR_A5JZ	ACC	invasion_of_tumor_capsule	Invasion of Tumor Capsule Present	42
TCGA_OR_A5JD	ACC	invasion_of_tumor_capsule	Invasion of Tumor Capsule Absent	31
TCGA_OR_A5L6	ACC	invasion_of_tumor_capsule	Invasion of Tumor Capsule Absent	31
TCGA_OR_A5LS	ACC	invasion_of_tumor_capsule	Invasion of Tumor Capsule Absent	31
TCGA_OR_A5JR	ACC	invasion_of_tumor_capsule	Invasion of Tumor Capsule Present	42
TCGA_OR_A5J5	ACC	invasion_of_tumor_capsule	Invasion of Tumor Capsule Present	42
TCGA_OR_A5KX	ACC	invasion_of_tumor_capsule	Invasion of Tumor Capsule Present	42
TCGA_OR_A5LL	ACC	invasion_of_tumor_capsule	Invasion of Tumor Capsule Present	42
TCGA_OR_A5KO	ACC	invasion_of_tumor_capsule	Invasion of Tumor Capsule Present	42
TCGA_OR_A5JI	ACC	invasion_of_tumor_capsule	Invasion of Tumor Capsule Absent	31
TCGA_OR_A5LG	ACC	invasion_of_tumor_capsule	Invasion of Tumor Capsule Present	42
TCGA_PK_A5H9	ACC	invasion_of_tumor_capsule	Invasion of Tumor Capsule Absent	31
TCGA_OR_A5JB	ACC	invasion_of_tumor_capsule	Invasion of Tumor Capsule Present	42
TCGA_OR_A5L8	ACC	invasion_of_tumor_capsule	Invasion of Tumor Capsule Present	42
TCGA_OR_A5J1	ACC	invasion_of_tumor_capsule	Invasion of Tumor Capsule Absent	31
TCGA_OR_A5J2	ACC	invasion_of_tumor_capsule	Invasion of Tumor Capsule Present	42
TCGA_OR_A5JT	ACC	invasion_of_tumor_capsule	Invasion of Tumor Capsule Absent	31
TCGA_OR_A5LH	ACC	invasion_of_tumor_capsule	Invasion of Tumor Capsule Absent	31
TCGA_OR_A5KV	ACC	mitotic_rate	Mitotic Rate > 5/50 HPF Absent	29
TCGA_OR_A5JS	ACC	mitotic_rate	Mitotic Rate > 5/50 HPF Present	41
TCGA_OR_A5JC	ACC	mitotic_rate	Mitotic Rate > 5/50 HPF Present	41
TCGA_P6_A5OG	ACC	mitotic_rate	Mitotic Rate > 5/50 HPF Absent	29
TCGA_OR_A5LC	ACC	mitotic_rate	Mitotic Rate > 5/50 HPF Absent	29
TCGA_OR_A5J9	ACC	mitotic_rate	Mitotic Rate > 5/50 HPF Present	41
TCGA_OR_A5JX	ACC	mitotic_rate	Mitotic Rate > 5/50 HPF Absent	29
TCGA_OR_A5LJ	ACC	mitotic_rate	Mitotic Rate > 5/50 HPF Present	41
TCGA_OR_A5LN	ACC	mitotic_rate	Mitotic Rate > 5/50 HPF Present	41
TCGA_OR_A5K2	ACC	mitotic_rate	Mitotic Rate > 5/50 HPF Present	41
TCGA_OR_A5K5	ACC	mitotic_rate	Mitotic Rate > 5/50 HPF Present	41
TCGA_OR_A5K0	ACC	mitotic_rate	Mitotic Rate > 5/50 HPF Present	41
TCGA_OR_A5LA	ACC	mitotic_rate	Mitotic Rate > 5/50 HPF Absent	29
TCGA_OR_A5JE	ACC	mitotic_rate	Mitotic Rate > 5/50 HPF Present	41
TCGA_OR_A5L5	ACC	mitotic_rate	Mitotic Rate > 5/50 HPF Present	41
TCGA_OR_A5L4	ACC	mitotic_rate	Mitotic Rate > 5/50 HPF Absent	29
TCGA_OR_A5J3	ACC	mitotic_rate	Mitotic Rate > 5/50 HPF Present	41
TCGA_OR_A5LB	ACC	mitotic_rate	Mitotic Rate > 5/50 HPF Present	41
TCGA_OR_A5JF	ACC	mitotic_rate	Mitotic Rate > 5/50 HPF Absent	29
TCGA_PK_A5H8	ACC	mitotic_rate	Mitotic Rate > 5/50 HPF Present	41
TCGA_OR_A5LP	ACC	mitotic_rate	Mitotic Rate > 5/50 HPF Absent	29
TCGA_OR_A5L9	ACC	mitotic_rate	Mitotic Rate > 5/50 HPF Absent	29
TCGA_OR_A5JA	ACC	mitotic_rate	Mitotic Rate > 5/50 HPF Present	41
TCGA_OR_A5KU	ACC	mitotic_rate	Mitotic Rate > 5/50 HPF Absent	29
TCGA_OR_A5J8	ACC	mitotic_rate	Mitotic Rate > 5/50 HPF Present	41
TCGA_OR_A5LM	ACC	mitotic_rate	Mitotic Rate > 5/50 HPF Present	41
TCGA_OR_A5KZ	ACC	mitotic_rate	Mitotic Rate > 5/50 HPF Present	41
TCGA_OR_A5JO	ACC	mitotic_rate	Mitotic Rate > 5/50 HPF Absent	29
TCGA_OR_A5JQ	ACC	mitotic_rate	Mitotic Rate > 5/50 HPF Absent	29
TCGA_OR_A5KT	ACC	mitotic_rate	Mitotic Rate > 5/50 HPF Absent	29
TCGA_OR_A5K8	ACC	mitotic_rate	Mitotic Rate > 5/50 HPF Present	41
TCGA_OR_A5L3	ACC	mitotic_rate	Mitotic Rate > 5/50 HPF Absent	29
TCGA_OR_A5JK	ACC	mitotic_rate	Mitotic Rate > 5/50 HPF Absent	29
TCGA_OR_A5LR	ACC	mitotic_rate	Mitotic Rate > 5/50 HPF Present	41
TCGA_OR_A5J7	ACC	mitotic_rate	Mitotic Rate > 5/50 HPF Absent	29
TCGA_OR_A5JP	ACC	mitotic_rate	Mitotic Rate > 5/50 HPF Present	41
TCGA_OU_A5PI	ACC	mitotic_rate	Mitotic Rate > 5/50 HPF Absent	29
TCGA_PK_A5HA	ACC	mitotic_rate	Mitotic Rate > 5/50 HPF Present	41
TCGA_OR_A5JG	ACC	mitotic_rate	Mitotic Rate > 5/50 HPF Present	41
TCGA_OR_A5JY	ACC	mitotic_rate	Mitotic Rate > 5/50 HPF Present	41
TCGA_OR_A5JM	ACC	mitotic_rate	Mitotic Rate > 5/50 HPF Present	41
TCGA_OR_A5K6	ACC	mitotic_rate	Mitotic Rate > 5/50 HPF Present	41
TCGA_OR_A5K4	ACC	mitotic_rate	Mitotic Rate > 5/50 HPF Absent	29
TCGA_OR_A5JL	ACC	mitotic_rate	Mitotic Rate > 5/50 HPF Present	41
TCGA_P6_A5OF	ACC	mitotic_rate	Mitotic Rate > 5/50 HPF Present	41
TCGA_OR_A5LE	ACC	mitotic_rate	Mitotic Rate > 5/50 HPF Present	41
TCGA_OR_A5LK	ACC	mitotic_rate	Mitotic Rate > 5/50 HPF Present	41
TCGA_OR_A5LO	ACC	mitotic_rate	Mitotic Rate > 5/50 HPF Present	41
TCGA_OR_A5LD	ACC	mitotic_rate	Mitotic Rate > 5/50 HPF Present	41
TCGA_OR_A5J6	ACC	mitotic_rate	Mitotic Rate > 5/50 HPF Present	41
TCGA_OR_A5JJ	ACC	mitotic_rate	Mitotic Rate > 5/50 HPF Present	41
TCGA_OR_A5LT	ACC	mitotic_rate	Mitotic Rate > 5/50 HPF Present	41
TCGA_OR_A5KY	ACC	mitotic_rate	Mitotic Rate > 5/50 HPF Absent	29
TCGA_OR_A5JZ	ACC	mitotic_rate	Mitotic Rate > 5/50 HPF Absent	29
TCGA_OR_A5JD	ACC	mitotic_rate	Mitotic Rate > 5/50 HPF Absent	29
TCGA_OR_A5L6	ACC	mitotic_rate	Mitotic Rate > 5/50 HPF Present	41
TCGA_OR_A5LS	ACC	mitotic_rate	Mitotic Rate > 5/50 HPF Present	41
TCGA_OR_A5J5	ACC	mitotic_rate	Mitotic Rate > 5/50 HPF Absent	29
TCGA_OR_A5KX	ACC	mitotic_rate	Mitotic Rate > 5/50 HPF Present	41
TCGA_OR_A5LL	ACC	mitotic_rate	Mitotic Rate > 5/50 HPF Present	41
TCGA_OR_A5KO	ACC	mitotic_rate	Mitotic Rate > 5/50 HPF Present	41
TCGA_OR_A5JI	ACC	mitotic_rate	Mitotic Rate > 5/50 HPF Absent	29
TCGA_OR_A5LG	ACC	mitotic_rate	Mitotic Rate > 5/50 HPF Present	41
TCGA_PK_A5H9	ACC	mitotic_rate	Mitotic Rate > 5/50 HPF Absent	29
TCGA_OR_A5JB	ACC	mitotic_rate	Mitotic Rate > 5/50 HPF Present	41
TCGA_OR_A5L8	ACC	mitotic_rate	Mitotic Rate > 5/50 HPF Absent	29
TCGA_OR_A5J1	ACC	mitotic_rate	Mitotic Rate > 5/50 HPF Absent	29
TCGA_OR_A5J2	ACC	mitotic_rate	Mitotic Rate > 5/50 HPF Absent	29
TCGA_OR_A5JT	ACC	mitotic_rate	Mitotic Rate > 5/50 HPF Absent	29
TCGA_OR_A5LH	ACC	mitotic_rate	Mitotic Rate > 5/50 HPF Absent	29
TCGA_OR_A5KV	ACC	pathologic_T	T1/T2	51
TCGA_OR_A5K3	ACC	pathologic_T	T1/T2	51
TCGA_OR_A5JS	ACC	pathologic_T	T1/T2	51
TCGA_P6_A5OG	ACC	pathologic_T	T3/T4	26
TCGA_OR_A5LC	ACC	pathologic_T	T3/T4	26
TCGA_OR_A5J9	ACC	pathologic_T	T1/T2	51
TCGA_OR_A5JX	ACC	pathologic_T	T3/T4	26
TCGA_OR_A5LJ	ACC	pathologic_T	T1/T2	51
TCGA_OR_A5LN	ACC	pathologic_T	T1/T2	51
TCGA_OR_A5K2	ACC	pathologic_T	T3/T4	26
TCGA_OR_A5K5	ACC	pathologic_T	T3/T4	26
TCGA_OR_A5K0	ACC	pathologic_T	T1/T2	51
TCGA_OR_A5KW	ACC	pathologic_T	T1/T2	51
TCGA_OR_A5LA	ACC	pathologic_T	T1/T2	51
TCGA_OR_A5JE	ACC	pathologic_T	T1/T2	51
TCGA_OR_A5L5	ACC	pathologic_T	T1/T2	51
TCGA_OR_A5L4	ACC	pathologic_T	T3/T4	26
TCGA_OR_A5J3	ACC	pathologic_T	T3/T4	26
TCGA_OR_A5LB	ACC	pathologic_T	T3/T4	26
TCGA_OR_A5JF	ACC	pathologic_T	T1/T2	51
TCGA_PK_A5H8	ACC	pathologic_T	T1/T2	51
TCGA_OR_A5LP	ACC	pathologic_T	T1/T2	51
TCGA_OR_A5L9	ACC	pathologic_T	T1/T2	51
TCGA_OR_A5K9	ACC	pathologic_T	T1/T2	51
TCGA_OR_A5JA	ACC	pathologic_T	T3/T4	26
TCGA_OR_A5KU	ACC	pathologic_T	T1/T2	51
TCGA_OR_A5J8	ACC	pathologic_T	T3/T4	26
TCGA_OR_A5LM	ACC	pathologic_T	T1/T2	51
TCGA_OR_A5KZ	ACC	pathologic_T	T1/T2	51
TCGA_OR_A5JO	ACC	pathologic_T	T1/T2	51
TCGA_OR_A5JQ	ACC	pathologic_T	T1/T2	51
TCGA_OR_A5KT	ACC	pathologic_T	T1/T2	51
TCGA_OR_A5K8	ACC	pathologic_T	T1/T2	51
TCGA_OR_A5L3	ACC	pathologic_T	T1/T2	51
TCGA_OR_A5JK	ACC	pathologic_T	T3/T4	26
TCGA_OR_A5K1	ACC	pathologic_T	T1/T2	51
TCGA_OR_A5LR	ACC	pathologic_T	T1/T2	51
TCGA_PA_A5YG	ACC	pathologic_T	T1/T2	51
TCGA_OR_A5J7	ACC	pathologic_T	T3/T4	26
TCGA_OR_A5JP	ACC	pathologic_T	T1/T2	51
TCGA_OR_A5JV	ACC	pathologic_T	T1/T2	51
TCGA_OU_A5PI	ACC	pathologic_T	T1/T2	51
TCGA_PK_A5HA	ACC	pathologic_T	T1/T2	51
TCGA_OR_A5JG	ACC	pathologic_T	T3/T4	26
TCGA_OR_A5JY	ACC	pathologic_T	T3/T4	26
TCGA_OR_A5JM	ACC	pathologic_T	T3/T4	26
TCGA_OR_A5K6	ACC	pathologic_T	T1/T2	51
TCGA_OR_A5K4	ACC	pathologic_T	T3/T4	26
TCGA_OR_A5JL	ACC	pathologic_T	T1/T2	51
TCGA_P6_A5OF	ACC	pathologic_T	T3/T4	26
TCGA_OR_A5LE	ACC	pathologic_T	T1/T2	51
TCGA_OR_A5LK	ACC	pathologic_T	T1/T2	51
TCGA_OR_A5LO	ACC	pathologic_T	T1/T2	51
TCGA_OR_A5LD	ACC	pathologic_T	T3/T4	26
TCGA_OR_A5J6	ACC	pathologic_T	T1/T2	51
TCGA_OR_A5JJ	ACC	pathologic_T	T3/T4	26
TCGA_OR_A5LT	ACC	pathologic_T	T3/T4	26
TCGA_OR_A5KY	ACC	pathologic_T	T3/T4	26
TCGA_OR_A5JZ	ACC	pathologic_T	T1/T2	51
TCGA_OR_A5JD	ACC	pathologic_T	T1/T2	51
TCGA_OR_A5L6	ACC	pathologic_T	T1/T2	51
TCGA_OR_A5LS	ACC	pathologic_T	T1/T2	51
TCGA_OR_A5JR	ACC	pathologic_T	T1/T2	51
TCGA_OR_A5J5	ACC	pathologic_T	T3/T4	26
TCGA_OR_A5KX	ACC	pathologic_T	T1/T2	51
TCGA_OR_A5LL	ACC	pathologic_T	T1/T2	51
TCGA_OR_A5KO	ACC	pathologic_T	T3/T4	26
TCGA_OR_A5JI	ACC	pathologic_T	T1/T2	51
TCGA_OR_A5LG	ACC	pathologic_T	T3/T4	26
TCGA_OR_A5JW	ACC	pathologic_T	T1/T2	51
TCGA_PK_A5H9	ACC	pathologic_T	T1/T2	51
TCGA_OR_A5JB	ACC	pathologic_T	T3/T4	26
TCGA_OR_A5L8	ACC	pathologic_T	T1/T2	51
TCGA_OR_A5J1	ACC	pathologic_T	T1/T2	51
TCGA_OR_A5J2	ACC	pathologic_T	T3/T4	26
TCGA_OR_A5JT	ACC	pathologic_T	T1/T2	51
TCGA_OR_A5LH	ACC	pathologic_T	T1/T2	51
TCGA_OR_A5KV	ACC	tumor_stage.diagnoses	stage iii/iv	31
TCGA_OR_A5K3	ACC	tumor_stage.diagnoses	stage i/ii	46
TCGA_OR_A5JS	ACC	tumor_stage.diagnoses	stage i/ii	46
TCGA_P6_A5OG	ACC	tumor_stage.diagnoses	stage iii/iv	31
TCGA_OR_A5LC	ACC	tumor_stage.diagnoses	stage iii/iv	31
TCGA_OR_A5J9	ACC	tumor_stage.diagnoses	stage i/ii	46
TCGA_OR_A5JX	ACC	tumor_stage.diagnoses	stage iii/iv	31
TCGA_OR_A5LJ	ACC	tumor_stage.diagnoses	stage iii/iv	31
TCGA_OR_A5LN	ACC	tumor_stage.diagnoses	stage i/ii	46
TCGA_OR_A5K2	ACC	tumor_stage.diagnoses	stage iii/iv	31
TCGA_OR_A5K5	ACC	tumor_stage.diagnoses	stage iii/iv	31
TCGA_OR_A5K0	ACC	tumor_stage.diagnoses	stage i/ii	46
TCGA_OR_A5KW	ACC	tumor_stage.diagnoses	stage iii/iv	31
TCGA_OR_A5LA	ACC	tumor_stage.diagnoses	stage i/ii	46
TCGA_OR_A5JE	ACC	tumor_stage.diagnoses	stage i/ii	46
TCGA_OR_A5L5	ACC	tumor_stage.diagnoses	stage i/ii	46
TCGA_OR_A5L4	ACC	tumor_stage.diagnoses	stage iii/iv	31
TCGA_OR_A5J3	ACC	tumor_stage.diagnoses	stage iii/iv	31
TCGA_OR_A5LB	ACC	tumor_stage.diagnoses	stage iii/iv	31
TCGA_OR_A5JF	ACC	tumor_stage.diagnoses	stage i/ii	46
TCGA_PK_A5H8	ACC	tumor_stage.diagnoses	stage i/ii	46
TCGA_OR_A5LP	ACC	tumor_stage.diagnoses	stage i/ii	46
TCGA_OR_A5L9	ACC	tumor_stage.diagnoses	stage i/ii	46
TCGA_OR_A5K9	ACC	tumor_stage.diagnoses	stage i/ii	46
TCGA_OR_A5JA	ACC	tumor_stage.diagnoses	stage iii/iv	31
TCGA_OR_A5KU	ACC	tumor_stage.diagnoses	stage i/ii	46
TCGA_OR_A5J8	ACC	tumor_stage.diagnoses	stage iii/iv	31
TCGA_OR_A5LM	ACC	tumor_stage.diagnoses	stage i/ii	46
TCGA_OR_A5KZ	ACC	tumor_stage.diagnoses	stage i/ii	46
TCGA_OR_A5JO	ACC	tumor_stage.diagnoses	stage i/ii	46
TCGA_OR_A5JQ	ACC	tumor_stage.diagnoses	stage i/ii	46
TCGA_OR_A5KT	ACC	tumor_stage.diagnoses	stage i/ii	46
TCGA_OR_A5K8	ACC	tumor_stage.diagnoses	stage i/ii	46
TCGA_OR_A5L3	ACC	tumor_stage.diagnoses	stage i/ii	46
TCGA_OR_A5JK	ACC	tumor_stage.diagnoses	stage iii/iv	31
TCGA_OR_A5K1	ACC	tumor_stage.diagnoses	stage i/ii	46
TCGA_OR_A5LR	ACC	tumor_stage.diagnoses	stage i/ii	46
TCGA_PA_A5YG	ACC	tumor_stage.diagnoses	stage i/ii	46
TCGA_OR_A5J7	ACC	tumor_stage.diagnoses	stage iii/iv	31
TCGA_OR_A5JP	ACC	tumor_stage.diagnoses	stage i/ii	46
TCGA_OR_A5JV	ACC	tumor_stage.diagnoses	stage i/ii	46
TCGA_OU_A5PI	ACC	tumor_stage.diagnoses	stage iii/iv	31
TCGA_PK_A5HA	ACC	tumor_stage.diagnoses	stage i/ii	46
TCGA_OR_A5JG	ACC	tumor_stage.diagnoses	stage iii/iv	31
TCGA_OR_A5JY	ACC	tumor_stage.diagnoses	stage iii/iv	31
TCGA_OR_A5JM	ACC	tumor_stage.diagnoses	stage iii/iv	31
TCGA_OR_A5K6	ACC	tumor_stage.diagnoses	stage i/ii	46
TCGA_OR_A5K4	ACC	tumor_stage.diagnoses	stage iii/iv	31
TCGA_OR_A5JL	ACC	tumor_stage.diagnoses	stage i/ii	46
TCGA_P6_A5OF	ACC	tumor_stage.diagnoses	stage iii/iv	31
TCGA_OR_A5LE	ACC	tumor_stage.diagnoses	stage i/ii	46
TCGA_OR_A5LK	ACC	tumor_stage.diagnoses	stage i/ii	46
TCGA_OR_A5LO	ACC	tumor_stage.diagnoses	stage i/ii	46
TCGA_OR_A5LD	ACC	tumor_stage.diagnoses	stage iii/iv	31
TCGA_OR_A5J6	ACC	tumor_stage.diagnoses	stage i/ii	46
TCGA_OR_A5JJ	ACC	tumor_stage.diagnoses	stage iii/iv	31
TCGA_OR_A5LT	ACC	tumor_stage.diagnoses	stage iii/iv	31
TCGA_OR_A5KY	ACC	tumor_stage.diagnoses	stage iii/iv	31
TCGA_OR_A5JZ	ACC	tumor_stage.diagnoses	stage i/ii	46
TCGA_OR_A5JD	ACC	tumor_stage.diagnoses	stage i/ii	46
TCGA_OR_A5L6	ACC	tumor_stage.diagnoses	stage i/ii	46
TCGA_OR_A5LS	ACC	tumor_stage.diagnoses	stage i/ii	46
TCGA_OR_A5JR	ACC	tumor_stage.diagnoses	stage i/ii	46
TCGA_OR_A5J5	ACC	tumor_stage.diagnoses	stage iii/iv	31
TCGA_OR_A5KX	ACC	tumor_stage.diagnoses	stage iii/iv	31
TCGA_OR_A5LL	ACC	tumor_stage.diagnoses	stage i/ii	46
TCGA_OR_A5KO	ACC	tumor_stage.diagnoses	stage iii/iv	31
TCGA_OR_A5JI	ACC	tumor_stage.diagnoses	stage i/ii	46
TCGA_OR_A5LG	ACC	tumor_stage.diagnoses	stage iii/iv	31
TCGA_OR_A5JW	ACC	tumor_stage.diagnoses	stage i/ii	46
TCGA_PK_A5H9	ACC	tumor_stage.diagnoses	stage i/ii	46
TCGA_OR_A5JB	ACC	tumor_stage.diagnoses	stage iii/iv	31
TCGA_OR_A5L8	ACC	tumor_stage.diagnoses	stage i/ii	46
TCGA_OR_A5J1	ACC	tumor_stage.diagnoses	stage i/ii	46
TCGA_OR_A5J2	ACC	tumor_stage.diagnoses	stage iii/iv	31
TCGA_OR_A5JT	ACC	tumor_stage.diagnoses	stage i/ii	46
TCGA_OR_A5LH	ACC	tumor_stage.diagnoses	stage i/ii	46
TCGA_OR_A5KV	ACC	sinusoid_invasion	Sinusoid Invasion Absent	35
TCGA_OR_A5JC	ACC	sinusoid_invasion	Sinusoid Invasion Present	25
TCGA_P6_A5OG	ACC	sinusoid_invasion	Sinusoid Invasion Absent	35
TCGA_OR_A5LC	ACC	sinusoid_invasion	Sinusoid Invasion Absent	35
TCGA_OR_A5J9	ACC	sinusoid_invasion	Sinusoid Invasion Present	25
TCGA_OR_A5LJ	ACC	sinusoid_invasion	Sinusoid Invasion Present	25
TCGA_OR_A5LN	ACC	sinusoid_invasion	Sinusoid Invasion Absent	35
TCGA_OR_A5LA	ACC	sinusoid_invasion	Sinusoid Invasion Absent	35
TCGA_OR_A5JE	ACC	sinusoid_invasion	Sinusoid Invasion Present	25
TCGA_OR_A5L4	ACC	sinusoid_invasion	Sinusoid Invasion Present	25
TCGA_OR_A5J3	ACC	sinusoid_invasion	Sinusoid Invasion Absent	35
TCGA_OR_A5LB	ACC	sinusoid_invasion	Sinusoid Invasion Present	25
TCGA_OR_A5JF	ACC	sinusoid_invasion	Sinusoid Invasion Absent	35
TCGA_PK_A5H8	ACC	sinusoid_invasion	Sinusoid Invasion Absent	35
TCGA_OR_A5LP	ACC	sinusoid_invasion	Sinusoid Invasion Present	25
TCGA_OR_A5L9	ACC	sinusoid_invasion	Sinusoid Invasion Absent	35
TCGA_OR_A5JA	ACC	sinusoid_invasion	Sinusoid Invasion Present	25
TCGA_OR_A5KU	ACC	sinusoid_invasion	Sinusoid Invasion Absent	35
TCGA_OR_A5J8	ACC	sinusoid_invasion	Sinusoid Invasion Absent	35
TCGA_OR_A5LM	ACC	sinusoid_invasion	Sinusoid Invasion Absent	35
TCGA_OR_A5KZ	ACC	sinusoid_invasion	Sinusoid Invasion Present	25
TCGA_OR_A5JO	ACC	sinusoid_invasion	Sinusoid Invasion Absent	35
TCGA_OR_A5JQ	ACC	sinusoid_invasion	Sinusoid Invasion Present	25
TCGA_OR_A5KT	ACC	sinusoid_invasion	Sinusoid Invasion Absent	35
TCGA_OR_A5K8	ACC	sinusoid_invasion	Sinusoid Invasion Absent	35
TCGA_OR_A5L3	ACC	sinusoid_invasion	Sinusoid Invasion Present	25
TCGA_OR_A5JK	ACC	sinusoid_invasion	Sinusoid Invasion Present	25
TCGA_OR_A5LR	ACC	sinusoid_invasion	Sinusoid Invasion Absent	35
TCGA_OR_A5J7	ACC	sinusoid_invasion	Sinusoid Invasion Absent	35
TCGA_OR_A5JP	ACC	sinusoid_invasion	Sinusoid Invasion Absent	35
TCGA_OU_A5PI	ACC	sinusoid_invasion	Sinusoid Invasion Absent	35
TCGA_PK_A5HA	ACC	sinusoid_invasion	Sinusoid Invasion Present	25
TCGA_OR_A5JG	ACC	sinusoid_invasion	Sinusoid Invasion Present	25
TCGA_OR_A5JM	ACC	sinusoid_invasion	Sinusoid Invasion Present	25
TCGA_OR_A5K6	ACC	sinusoid_invasion	Sinusoid Invasion Absent	35
TCGA_OR_A5JL	ACC	sinusoid_invasion	Sinusoid Invasion Absent	35
TCGA_OR_A5LE	ACC	sinusoid_invasion	Sinusoid Invasion Present	25
TCGA_OR_A5LK	ACC	sinusoid_invasion	Sinusoid Invasion Absent	35
TCGA_OR_A5LO	ACC	sinusoid_invasion	Sinusoid Invasion Absent	35
TCGA_OR_A5LD	ACC	sinusoid_invasion	Sinusoid Invasion Present	25
TCGA_OR_A5J6	ACC	sinusoid_invasion	Sinusoid Invasion Absent	35
TCGA_OR_A5JJ	ACC	sinusoid_invasion	Sinusoid Invasion Present	25
TCGA_OR_A5LT	ACC	sinusoid_invasion	Sinusoid Invasion Absent	35
TCGA_OR_A5KY	ACC	sinusoid_invasion	Sinusoid Invasion Absent	35
TCGA_OR_A5JD	ACC	sinusoid_invasion	Sinusoid Invasion Absent	35
TCGA_OR_A5L6	ACC	sinusoid_invasion	Sinusoid Invasion Present	25
TCGA_OR_A5LS	ACC	sinusoid_invasion	Sinusoid Invasion Present	25
TCGA_OR_A5JR	ACC	sinusoid_invasion	Sinusoid Invasion Absent	35
TCGA_OR_A5J5	ACC	sinusoid_invasion	Sinusoid Invasion Present	25
TCGA_OR_A5KX	ACC	sinusoid_invasion	Sinusoid Invasion Absent	35
TCGA_OR_A5LL	ACC	sinusoid_invasion	Sinusoid Invasion Absent	35
TCGA_OR_A5KO	ACC	sinusoid_invasion	Sinusoid Invasion Present	25
TCGA_OR_A5JI	ACC	sinusoid_invasion	Sinusoid Invasion Absent	35
TCGA_OR_A5LG	ACC	sinusoid_invasion	Sinusoid Invasion Absent	35
TCGA_PK_A5H9	ACC	sinusoid_invasion	Sinusoid Invasion Absent	35
TCGA_OR_A5JB	ACC	sinusoid_invasion	Sinusoid Invasion Absent	35
TCGA_OR_A5L8	ACC	sinusoid_invasion	Sinusoid Invasion Present	25
TCGA_OR_A5J1	ACC	sinusoid_invasion	Sinusoid Invasion Absent	35
TCGA_OR_A5J2	ACC	sinusoid_invasion	Sinusoid Invasion Present	25
TCGA_OR_A5LH	ACC	sinusoid_invasion	Sinusoid Invasion Present	25
TCGA_OR_A5KV	ACC	weiss_venous_invasion	Venous Invasion Absent	39
TCGA_OR_A5JC	ACC	weiss_venous_invasion	Venous Invasion Present	31
TCGA_P6_A5OG	ACC	weiss_venous_invasion	Venous Invasion Absent	39
TCGA_OR_A5LC	ACC	weiss_venous_invasion	Venous Invasion Present	31
TCGA_OR_A5J9	ACC	weiss_venous_invasion	Venous Invasion Absent	39
TCGA_OR_A5JX	ACC	weiss_venous_invasion	Venous Invasion Present	31
TCGA_OR_A5LJ	ACC	weiss_venous_invasion	Venous Invasion Present	31
TCGA_OR_A5LN	ACC	weiss_venous_invasion	Venous Invasion Absent	39
TCGA_OR_A5K2	ACC	weiss_venous_invasion	Venous Invasion Present	31
TCGA_OR_A5K5	ACC	weiss_venous_invasion	Venous Invasion Present	31
TCGA_OR_A5K0	ACC	weiss_venous_invasion	Venous Invasion Absent	39
TCGA_OR_A5LA	ACC	weiss_venous_invasion	Venous Invasion Absent	39
TCGA_OR_A5JE	ACC	weiss_venous_invasion	Venous Invasion Absent	39
TCGA_OR_A5L4	ACC	weiss_venous_invasion	Venous Invasion Present	31
TCGA_OR_A5J3	ACC	weiss_venous_invasion	Venous Invasion Present	31
TCGA_OR_A5LB	ACC	weiss_venous_invasion	Venous Invasion Present	31
TCGA_OR_A5JF	ACC	weiss_venous_invasion	Venous Invasion Absent	39
TCGA_PK_A5H8	ACC	weiss_venous_invasion	Venous Invasion Present	31
TCGA_OR_A5LP	ACC	weiss_venous_invasion	Venous Invasion Absent	39
TCGA_OR_A5L9	ACC	weiss_venous_invasion	Venous Invasion Absent	39
TCGA_OR_A5JA	ACC	weiss_venous_invasion	Venous Invasion Present	31
TCGA_OR_A5KU	ACC	weiss_venous_invasion	Venous Invasion Absent	39
TCGA_OR_A5J8	ACC	weiss_venous_invasion	Venous Invasion Present	31
TCGA_OR_A5LM	ACC	weiss_venous_invasion	Venous Invasion Absent	39
TCGA_OR_A5KZ	ACC	weiss_venous_invasion	Venous Invasion Present	31
TCGA_OR_A5JO	ACC	weiss_venous_invasion	Venous Invasion Present	31
TCGA_OR_A5JQ	ACC	weiss_venous_invasion	Venous Invasion Absent	39
TCGA_OR_A5KT	ACC	weiss_venous_invasion	Venous Invasion Absent	39
TCGA_OR_A5K8	ACC	weiss_venous_invasion	Venous Invasion Absent	39
TCGA_OR_A5L3	ACC	weiss_venous_invasion	Venous Invasion Absent	39
TCGA_OR_A5JK	ACC	weiss_venous_invasion	Venous Invasion Present	31
TCGA_OR_A5LR	ACC	weiss_venous_invasion	Venous Invasion Absent	39
TCGA_OR_A5J7	ACC	weiss_venous_invasion	Venous Invasion Present	31
TCGA_OR_A5JP	ACC	weiss_venous_invasion	Venous Invasion Absent	39
TCGA_OR_A5JV	ACC	weiss_venous_invasion	Venous Invasion Absent	39
TCGA_OU_A5PI	ACC	weiss_venous_invasion	Venous Invasion Absent	39
TCGA_PK_A5HA	ACC	weiss_venous_invasion	Venous Invasion Absent	39
TCGA_OR_A5JG	ACC	weiss_venous_invasion	Venous Invasion Present	31
TCGA_OR_A5JY	ACC	weiss_venous_invasion	Venous Invasion Present	31
TCGA_OR_A5JM	ACC	weiss_venous_invasion	Venous Invasion Present	31
TCGA_OR_A5K6	ACC	weiss_venous_invasion	Venous Invasion Absent	39
TCGA_OR_A5K4	ACC	weiss_venous_invasion	Venous Invasion Present	31
TCGA_OR_A5JL	ACC	weiss_venous_invasion	Venous Invasion Absent	39
TCGA_P6_A5OF	ACC	weiss_venous_invasion	Venous Invasion Present	31
TCGA_OR_A5LE	ACC	weiss_venous_invasion	Venous Invasion Absent	39
TCGA_OR_A5LK	ACC	weiss_venous_invasion	Venous Invasion Absent	39
TCGA_OR_A5LO	ACC	weiss_venous_invasion	Venous Invasion Absent	39
TCGA_OR_A5LD	ACC	weiss_venous_invasion	Venous Invasion Absent	39
TCGA_OR_A5J6	ACC	weiss_venous_invasion	Venous Invasion Absent	39
TCGA_OR_A5JJ	ACC	weiss_venous_invasion	Venous Invasion Present	31
TCGA_OR_A5LT	ACC	weiss_venous_invasion	Venous Invasion Present	31
TCGA_OR_A5KY	ACC	weiss_venous_invasion	Venous Invasion Absent	39
TCGA_OR_A5JZ	ACC	weiss_venous_invasion	Venous Invasion Absent	39
TCGA_OR_A5JD	ACC	weiss_venous_invasion	Venous Invasion Absent	39
TCGA_OR_A5L6	ACC	weiss_venous_invasion	Venous Invasion Present	31
TCGA_OR_A5LS	ACC	weiss_venous_invasion	Venous Invasion Present	31
TCGA_OR_A5JR	ACC	weiss_venous_invasion	Venous Invasion Absent	39
TCGA_OR_A5J5	ACC	weiss_venous_invasion	Venous Invasion Present	31
TCGA_OR_A5KX	ACC	weiss_venous_invasion	Venous Invasion Present	31
TCGA_OR_A5LL	ACC	weiss_venous_invasion	Venous Invasion Absent	39
TCGA_OR_A5KO	ACC	weiss_venous_invasion	Venous Invasion Present	31
TCGA_OR_A5JI	ACC	weiss_venous_invasion	Venous Invasion Absent	39
TCGA_OR_A5LG	ACC	weiss_venous_invasion	Venous Invasion Absent	39
TCGA_PK_A5H9	ACC	weiss_venous_invasion	Venous Invasion Present	31
TCGA_OR_A5JB	ACC	weiss_venous_invasion	Venous Invasion Absent	39
TCGA_OR_A5L8	ACC	weiss_venous_invasion	Venous Invasion Present	31
TCGA_OR_A5J1	ACC	weiss_venous_invasion	Venous Invasion Absent	39
TCGA_OR_A5J2	ACC	weiss_venous_invasion	Venous Invasion Present	31
TCGA_OR_A5JT	ACC	weiss_venous_invasion	Venous Invasion Absent	39
TCGA_OR_A5LH	ACC	weiss_venous_invasion	Venous Invasion Absent	39
TCGA_OR_A5KV	ACC	gender.demographic	female	48
TCGA_OR_A5K3	ACC	gender.demographic	male	31
TCGA_OR_A5JS	ACC	gender.demographic	female	48
TCGA_OR_A5JC	ACC	gender.demographic	male	31
TCGA_P6_A5OG	ACC	gender.demographic	female	48
TCGA_OR_A5LC	ACC	gender.demographic	female	48
TCGA_OR_A5J9	ACC	gender.demographic	female	48
TCGA_OR_A5JX	ACC	gender.demographic	male	31
TCGA_OR_A5LJ	ACC	gender.demographic	female	48
TCGA_OR_A5LN	ACC	gender.demographic	female	48
TCGA_OR_A5K2	ACC	gender.demographic	female	48
TCGA_OR_A5K5	ACC	gender.demographic	female	48
TCGA_OR_A5K0	ACC	gender.demographic	female	48
TCGA_OR_A5KW	ACC	gender.demographic	female	48
TCGA_OR_A5LA	ACC	gender.demographic	female	48
TCGA_OR_A5JE	ACC	gender.demographic	female	48
TCGA_OR_A5L5	ACC	gender.demographic	female	48
TCGA_OR_A5L4	ACC	gender.demographic	female	48
TCGA_OR_A5J3	ACC	gender.demographic	female	48
TCGA_OR_A5LB	ACC	gender.demographic	male	31
TCGA_OR_A5JF	ACC	gender.demographic	female	48
TCGA_PK_A5H8	ACC	gender.demographic	male	31
TCGA_OR_A5LP	ACC	gender.demographic	female	48
TCGA_OR_A5L9	ACC	gender.demographic	female	48
TCGA_PK_A5HB	ACC	gender.demographic	male	31
TCGA_OR_A5K9	ACC	gender.demographic	female	48
TCGA_OR_A5JA	ACC	gender.demographic	female	48
TCGA_OR_A5KU	ACC	gender.demographic	female	48
TCGA_OR_A5J8	ACC	gender.demographic	male	31
TCGA_OR_A5LM	ACC	gender.demographic	male	31
TCGA_OR_A5KZ	ACC	gender.demographic	male	31
TCGA_OR_A5JO	ACC	gender.demographic	female	48
TCGA_OR_A5JQ	ACC	gender.demographic	female	48
TCGA_OR_A5KT	ACC	gender.demographic	female	48
TCGA_OR_A5K8	ACC	gender.demographic	male	31
TCGA_OR_A5L3	ACC	gender.demographic	female	48
TCGA_OR_A5JK	ACC	gender.demographic	male	31
TCGA_OR_A5K1	ACC	gender.demographic	male	31
TCGA_OR_A5LR	ACC	gender.demographic	female	48
TCGA_PA_A5YG	ACC	gender.demographic	male	31
TCGA_OR_A5J7	ACC	gender.demographic	female	48
TCGA_OR_A5JP	ACC	gender.demographic	male	31
TCGA_OR_A5JV	ACC	gender.demographic	male	31
TCGA_OU_A5PI	ACC	gender.demographic	female	48
TCGA_PK_A5HA	ACC	gender.demographic	male	31
TCGA_OR_A5JG	ACC	gender.demographic	male	31
TCGA_OR_A5JY	ACC	gender.demographic	female	48
TCGA_OR_A5JM	ACC	gender.demographic	female	48
TCGA_OR_A5K6	ACC	gender.demographic	female	48
TCGA_OR_A5K4	ACC	gender.demographic	female	48
TCGA_OR_A5JL	ACC	gender.demographic	female	48
TCGA_P6_A5OF	ACC	gender.demographic	female	48
TCGA_OR_A5LE	ACC	gender.demographic	male	31
TCGA_OR_A5LK	ACC	gender.demographic	male	31
TCGA_OR_A5LO	ACC	gender.demographic	female	48
TCGA_OR_A5LD	ACC	gender.demographic	male	31
TCGA_OR_A5J6	ACC	gender.demographic	female	48
TCGA_OR_A5JJ	ACC	gender.demographic	male	31
TCGA_OR_A5LT	ACC	gender.demographic	male	31
TCGA_OR_A5KY	ACC	gender.demographic	female	48
TCGA_OR_A5JZ	ACC	gender.demographic	male	31
TCGA_OR_A5JD	ACC	gender.demographic	female	48
TCGA_OR_A5L6	ACC	gender.demographic	male	31
TCGA_OR_A5LS	ACC	gender.demographic	female	48
TCGA_OR_A5JR	ACC	gender.demographic	male	31
TCGA_OR_A5J5	ACC	gender.demographic	male	31
TCGA_OR_A5KX	ACC	gender.demographic	female	48
TCGA_OR_A5LL	ACC	gender.demographic	female	48
TCGA_OR_A5KO	ACC	gender.demographic	female	48
TCGA_OR_A5JI	ACC	gender.demographic	male	31
TCGA_OR_A5LG	ACC	gender.demographic	male	31
TCGA_OR_A5JW	ACC	gender.demographic	male	31
TCGA_PK_A5H9	ACC	gender.demographic	female	48
TCGA_OR_A5JB	ACC	gender.demographic	male	31
TCGA_OR_A5L8	ACC	gender.demographic	female	48
TCGA_OR_A5J1	ACC	gender.demographic	male	31
TCGA_OR_A5J2	ACC	gender.demographic	female	48
TCGA_OR_A5JT	ACC	gender.demographic	female	48
TCGA_OR_A5LH	ACC	gender.demographic	female	48
TCGA_DK_A2I6	BLCA	age_at_initial_pathologic_diagnosis	>= 69	203
TCGA_FD_A43X	BLCA	age_at_initial_pathologic_diagnosis	>= 69	203
TCGA_GC_A4ZW	BLCA	age_at_initial_pathologic_diagnosis	>= 69	203
TCGA_FD_A5C0	BLCA	age_at_initial_pathologic_diagnosis	< 69	204
TCGA_GU_AATO	BLCA	age_at_initial_pathologic_diagnosis	>= 69	203
TCGA_H4_A2HQ	BLCA	age_at_initial_pathologic_diagnosis	< 69	204
TCGA_XF_A9SL	BLCA	age_at_initial_pathologic_diagnosis	>= 69	203
TCGA_4Z_AA7Y	BLCA	age_at_initial_pathologic_diagnosis	< 69	204
TCGA_2F_A9KP	BLCA	age_at_initial_pathologic_diagnosis	< 69	204
TCGA_K4_A54R	BLCA	age_at_initial_pathologic_diagnosis	< 69	204
TCGA_BT_A2LB	BLCA	age_at_initial_pathologic_diagnosis	>= 69	203
TCGA_GU_A42Q	BLCA	age_at_initial_pathologic_diagnosis	< 69	204
TCGA_XF_AAMR	BLCA	age_at_initial_pathologic_diagnosis	< 69	204
TCGA_FD_A5BS	BLCA	age_at_initial_pathologic_diagnosis	< 69	204
TCGA_G2_A3VY	BLCA	age_at_initial_pathologic_diagnosis	< 69	204
TCGA_4Z_AA7W	BLCA	age_at_initial_pathologic_diagnosis	< 69	204
TCGA_DK_A1AC	BLCA	age_at_initial_pathologic_diagnosis	>= 69	203
TCGA_FJ_A871	BLCA	age_at_initial_pathologic_diagnosis	< 69	204
TCGA_E7_A85H	BLCA	age_at_initial_pathologic_diagnosis	< 69	204
TCGA_CF_A3MG	BLCA	age_at_initial_pathologic_diagnosis	< 69	204
TCGA_FD_A6TG	BLCA	age_at_initial_pathologic_diagnosis	>= 69	203
TCGA_CF_A47Y	BLCA	age_at_initial_pathologic_diagnosis	< 69	204
TCGA_DK_A3IL	BLCA	age_at_initial_pathologic_diagnosis	>= 69	203
TCGA_CF_A47X	BLCA	age_at_initial_pathologic_diagnosis	< 69	204
TCGA_G2_AA3F	BLCA	age_at_initial_pathologic_diagnosis	>= 69	203
TCGA_UY_A8OC	BLCA	age_at_initial_pathologic_diagnosis	>= 69	203
TCGA_XF_A9T8	BLCA	age_at_initial_pathologic_diagnosis	< 69	204
TCGA_DK_AA6M	BLCA	age_at_initial_pathologic_diagnosis	< 69	204
TCGA_DK_A1AF	BLCA	age_at_initial_pathologic_diagnosis	>= 69	203
TCGA_FD_A6TI	BLCA	age_at_initial_pathologic_diagnosis	>= 69	203
TCGA_BL_A5ZZ	BLCA	age_at_initial_pathologic_diagnosis	>= 69	203
TCGA_C4_A0F6	BLCA	age_at_initial_pathologic_diagnosis	>= 69	203
TCGA_FD_A62P	BLCA	age_at_initial_pathologic_diagnosis	>= 69	203
TCGA_XF_A8HB	BLCA	age_at_initial_pathologic_diagnosis	< 69	204
TCGA_FD_A5BY	BLCA	age_at_initial_pathologic_diagnosis	< 69	204
TCGA_K4_A4AB	BLCA	age_at_initial_pathologic_diagnosis	>= 69	203
TCGA_CF_A9FL	BLCA	age_at_initial_pathologic_diagnosis	>= 69	203
TCGA_DK_A1AG	BLCA	age_at_initial_pathologic_diagnosis	< 69	204
TCGA_GC_A3BM	BLCA	age_at_initial_pathologic_diagnosis	>= 69	203
TCGA_FD_A5BV	BLCA	age_at_initial_pathologic_diagnosis	< 69	204
TCGA_BT_A20Q	BLCA	age_at_initial_pathologic_diagnosis	>= 69	203
TCGA_E7_A6ME	BLCA	age_at_initial_pathologic_diagnosis	>= 69	203
TCGA_SY_A9G5	BLCA	age_at_initial_pathologic_diagnosis	< 69	204
TCGA_G2_A2EO	BLCA	age_at_initial_pathologic_diagnosis	>= 69	203
TCGA_CF_A9FM	BLCA	age_at_initial_pathologic_diagnosis	< 69	204
TCGA_CF_A47W	BLCA	age_at_initial_pathologic_diagnosis	< 69	204
TCGA_XF_A8HI	BLCA	age_at_initial_pathologic_diagnosis	< 69	204
TCGA_E7_A4XJ	BLCA	age_at_initial_pathologic_diagnosis	< 69	204
TCGA_DK_AA75	BLCA	age_at_initial_pathologic_diagnosis	>= 69	203
TCGA_FD_A3SJ	BLCA	age_at_initial_pathologic_diagnosis	< 69	204
TCGA_4Z_AA81	BLCA	age_at_initial_pathologic_diagnosis	>= 69	203
TCGA_G2_A2EC	BLCA	age_at_initial_pathologic_diagnosis	< 69	204
TCGA_FD_A6TE	BLCA	age_at_initial_pathologic_diagnosis	< 69	204
TCGA_E7_A8O8	BLCA	age_at_initial_pathologic_diagnosis	< 69	204
TCGA_ZF_A9RM	BLCA	age_at_initial_pathologic_diagnosis	>= 69	203
TCGA_FD_A62O	BLCA	age_at_initial_pathologic_diagnosis	>= 69	203
TCGA_2F_A9KO	BLCA	age_at_initial_pathologic_diagnosis	< 69	204
TCGA_DK_A3WX	BLCA	age_at_initial_pathologic_diagnosis	< 69	204
TCGA_DK_AA6T	BLCA	age_at_initial_pathologic_diagnosis	< 69	204
TCGA_DK_A1AE	BLCA	age_at_initial_pathologic_diagnosis	>= 69	203
TCGA_R3_A69X	BLCA	age_at_initial_pathologic_diagnosis	>= 69	203
TCGA_XF_A9T2	BLCA	age_at_initial_pathologic_diagnosis	< 69	204
TCGA_4Z_AA83	BLCA	age_at_initial_pathologic_diagnosis	< 69	204
TCGA_KQ_A41R	BLCA	age_at_initial_pathologic_diagnosis	>= 69	203
TCGA_UY_A78N	BLCA	age_at_initial_pathologic_diagnosis	>= 69	203
TCGA_DK_AA6R	BLCA	age_at_initial_pathologic_diagnosis	< 69	204
TCGA_GC_A6I1	BLCA	age_at_initial_pathologic_diagnosis	>= 69	203
TCGA_XF_AAN4	BLCA	age_at_initial_pathologic_diagnosis	>= 69	203
TCGA_BL_A13I	BLCA	age_at_initial_pathologic_diagnosis	< 69	204
TCGA_BL_A13I	BLCA	age_at_initial_pathologic_diagnosis	< 69	204
TCGA_S5_A6DX	BLCA	age_at_initial_pathologic_diagnosis	>= 69	203
TCGA_DK_A6B6	BLCA	age_at_initial_pathologic_diagnosis	< 69	204
TCGA_YF_AA3M	BLCA	age_at_initial_pathologic_diagnosis	< 69	204
TCGA_ZF_A9R7	BLCA	age_at_initial_pathologic_diagnosis	>= 69	203
TCGA_GC_A3RC	BLCA	age_at_initial_pathologic_diagnosis	< 69	204
TCGA_CF_A3MF	BLCA	age_at_initial_pathologic_diagnosis	< 69	204
TCGA_4Z_AA7R	BLCA	age_at_initial_pathologic_diagnosis	>= 69	203
TCGA_XF_A9SZ	BLCA	age_at_initial_pathologic_diagnosis	>= 69	203
TCGA_DK_A3IT	BLCA	age_at_initial_pathologic_diagnosis	< 69	204
TCGA_XF_AAMZ	BLCA	age_at_initial_pathologic_diagnosis	>= 69	203
TCGA_G2_AA3D	BLCA	age_at_initial_pathologic_diagnosis	< 69	204
TCGA_K4_A5RJ	BLCA	age_at_initial_pathologic_diagnosis	>= 69	203
TCGA_G2_A2EL	BLCA	age_at_initial_pathologic_diagnosis	>= 69	203
TCGA_CU_A3QU	BLCA	age_at_initial_pathologic_diagnosis	< 69	204
TCGA_FD_A5C1	BLCA	age_at_initial_pathologic_diagnosis	< 69	204
TCGA_GD_A76B	BLCA	age_at_initial_pathologic_diagnosis	>= 69	203
TCGA_GU_AATQ	BLCA	age_at_initial_pathologic_diagnosis	< 69	204
TCGA_FD_A5BZ	BLCA	age_at_initial_pathologic_diagnosis	>= 69	203
TCGA_MV_A51V	BLCA	age_at_initial_pathologic_diagnosis	>= 69	203
TCGA_BT_A20P	BLCA	age_at_initial_pathologic_diagnosis	>= 69	203
TCGA_2F_A9KQ	BLCA	age_at_initial_pathologic_diagnosis	>= 69	203
TCGA_BT_A3PJ	BLCA	age_at_initial_pathologic_diagnosis	>= 69	203
TCGA_BT_A20O	BLCA	age_at_initial_pathologic_diagnosis	>= 69	203
TCGA_BT_A20R	BLCA	age_at_initial_pathologic_diagnosis	>= 69	203
TCGA_GV_A3JW	BLCA	age_at_initial_pathologic_diagnosis	>= 69	203
TCGA_BT_A20V	BLCA	age_at_initial_pathologic_diagnosis	< 69	204
TCGA_PQ_A6FI	BLCA	age_at_initial_pathologic_diagnosis	>= 69	203
TCGA_UY_A9PB	BLCA	age_at_initial_pathologic_diagnosis	< 69	204
TCGA_CF_A9FF	BLCA	age_at_initial_pathologic_diagnosis	< 69	204
TCGA_XF_AAN3	BLCA	age_at_initial_pathologic_diagnosis	>= 69	203
TCGA_ZF_A9RD	BLCA	age_at_initial_pathologic_diagnosis	>= 69	203
TCGA_KQ_A41O	BLCA	age_at_initial_pathologic_diagnosis	>= 69	203
TCGA_XF_AAMY	BLCA	age_at_initial_pathologic_diagnosis	>= 69	203
TCGA_GU_A42P	BLCA	age_at_initial_pathologic_diagnosis	>= 69	203
TCGA_FD_A6TF	BLCA	age_at_initial_pathologic_diagnosis	>= 69	203
TCGA_GD_A3OS	BLCA	age_at_initial_pathologic_diagnosis	< 69	204
TCGA_XF_A8HH	BLCA	age_at_initial_pathologic_diagnosis	< 69	204
TCGA_G2_AA3B	BLCA	age_at_initial_pathologic_diagnosis	>= 69	203
TCGA_ZF_A9R2	BLCA	age_at_initial_pathologic_diagnosis	>= 69	203
TCGA_C4_A0F1	BLCA	age_at_initial_pathologic_diagnosis	>= 69	203
TCGA_ZF_A9RF	BLCA	age_at_initial_pathologic_diagnosis	>= 69	203
TCGA_KQ_A41Q	BLCA	age_at_initial_pathologic_diagnosis	>= 69	203
TCGA_UY_A9PF	BLCA	age_at_initial_pathologic_diagnosis	>= 69	203
TCGA_ZF_AA4W	BLCA	age_at_initial_pathologic_diagnosis	< 69	204
TCGA_H4_A2HO	BLCA	age_at_initial_pathologic_diagnosis	< 69	204
TCGA_H4_A2HO	BLCA	age_at_initial_pathologic_diagnosis	< 69	204
TCGA_FJ_A3Z9	BLCA	age_at_initial_pathologic_diagnosis	>= 69	203
TCGA_XF_A9ST	BLCA	age_at_initial_pathologic_diagnosis	< 69	204
TCGA_UY_A8OB	BLCA	age_at_initial_pathologic_diagnosis	< 69	204
TCGA_E7_A4IJ	BLCA	age_at_initial_pathologic_diagnosis	< 69	204
TCGA_DK_A6B5	BLCA	age_at_initial_pathologic_diagnosis	< 69	204
TCGA_YC_A8S6	BLCA	age_at_initial_pathologic_diagnosis	>= 69	203
TCGA_BL_A0C8	BLCA	age_at_initial_pathologic_diagnosis	>= 69	203
TCGA_BL_A0C8	BLCA	age_at_initial_pathologic_diagnosis	>= 69	203
TCGA_DK_AA71	BLCA	age_at_initial_pathologic_diagnosis	>= 69	203
TCGA_FD_A43Y	BLCA	age_at_initial_pathologic_diagnosis	< 69	204
TCGA_FD_A62S	BLCA	age_at_initial_pathologic_diagnosis	< 69	204
TCGA_BT_A0YX	BLCA	age_at_initial_pathologic_diagnosis	>= 69	203
TCGA_XF_AAMT	BLCA	age_at_initial_pathologic_diagnosis	>= 69	203
TCGA_GV_A40E	BLCA	age_at_initial_pathologic_diagnosis	>= 69	203
TCGA_GC_A3I6	BLCA	age_at_initial_pathologic_diagnosis	< 69	204
TCGA_ZF_A9RC	BLCA	age_at_initial_pathologic_diagnosis	>= 69	203
TCGA_E7_A7DU	BLCA	age_at_initial_pathologic_diagnosis	>= 69	203
TCGA_YC_A89H	BLCA	age_at_initial_pathologic_diagnosis	>= 69	203
TCGA_CF_A3MI	BLCA	age_at_initial_pathologic_diagnosis	< 69	204
TCGA_XF_A9SI	BLCA	age_at_initial_pathologic_diagnosis	>= 69	203
TCGA_E7_A3X6	BLCA	age_at_initial_pathologic_diagnosis	>= 69	203
TCGA_XF_A9SY	BLCA	age_at_initial_pathologic_diagnosis	< 69	204
TCGA_KQ_A41N	BLCA	age_at_initial_pathologic_diagnosis	>= 69	203
TCGA_ZF_A9R3	BLCA	age_at_initial_pathologic_diagnosis	< 69	204
TCGA_DK_AA6P	BLCA	age_at_initial_pathologic_diagnosis	>= 69	203
TCGA_4Z_AA86	BLCA	age_at_initial_pathologic_diagnosis	< 69	204
TCGA_4Z_AA7M	BLCA	age_at_initial_pathologic_diagnosis	< 69	204
TCGA_BT_A42F	BLCA	age_at_initial_pathologic_diagnosis	< 69	204
TCGA_E7_A678	BLCA	age_at_initial_pathologic_diagnosis	< 69	204
TCGA_GU_A762	BLCA	age_at_initial_pathologic_diagnosis	>= 69	203
TCGA_DK_AA6Q	BLCA	age_at_initial_pathologic_diagnosis	< 69	204
TCGA_DK_A6B1	BLCA	age_at_initial_pathologic_diagnosis	< 69	204
TCGA_XF_A9SX	BLCA	age_at_initial_pathologic_diagnosis	< 69	204
TCGA_E7_A6MD	BLCA	age_at_initial_pathologic_diagnosis	< 69	204
TCGA_4Z_AA7Q	BLCA	age_at_initial_pathologic_diagnosis	>= 69	203
TCGA_DK_A3X2	BLCA	age_at_initial_pathologic_diagnosis	>= 69	203
TCGA_UY_A8OD	BLCA	age_at_initial_pathologic_diagnosis	< 69	204
TCGA_ZF_A9R5	BLCA	age_at_initial_pathologic_diagnosis	< 69	204
TCGA_ZF_A9R0	BLCA	age_at_initial_pathologic_diagnosis	>= 69	203
TCGA_LT_A8JT	BLCA	age_at_initial_pathologic_diagnosis	>= 69	203
TCGA_BT_A20X	BLCA	age_at_initial_pathologic_diagnosis	< 69	204
TCGA_K4_A3WS	BLCA	age_at_initial_pathologic_diagnosis	< 69	204
TCGA_CF_A47V	BLCA	age_at_initial_pathologic_diagnosis	< 69	204
TCGA_FD_A5BU	BLCA	age_at_initial_pathologic_diagnosis	>= 69	203
TCGA_XF_A8HF	BLCA	age_at_initial_pathologic_diagnosis	>= 69	203
TCGA_BT_A20J	BLCA	age_at_initial_pathologic_diagnosis	>= 69	203
TCGA_GD_A3OP	BLCA	age_at_initial_pathologic_diagnosis	>= 69	203
TCGA_CU_A5W6	BLCA	age_at_initial_pathologic_diagnosis	>= 69	203
TCGA_4Z_AA84	BLCA	age_at_initial_pathologic_diagnosis	< 69	204
TCGA_XF_AAMW	BLCA	age_at_initial_pathologic_diagnosis	>= 69	203
TCGA_DK_A1A3	BLCA	age_at_initial_pathologic_diagnosis	< 69	204
TCGA_5N_A9KM	BLCA	age_at_initial_pathologic_diagnosis	>= 69	203
TCGA_E7_A541	BLCA	age_at_initial_pathologic_diagnosis	< 69	204
TCGA_XF_A9T0	BLCA	age_at_initial_pathologic_diagnosis	< 69	204
TCGA_2F_A9KR	BLCA	age_at_initial_pathologic_diagnosis	< 69	204
TCGA_XF_AAMX	BLCA	age_at_initial_pathologic_diagnosis	>= 69	203
TCGA_4Z_AA87	BLCA	age_at_initial_pathologic_diagnosis	>= 69	203
TCGA_XF_A9SU	BLCA	age_at_initial_pathologic_diagnosis	>= 69	203
TCGA_ZF_AA51	BLCA	age_at_initial_pathologic_diagnosis	>= 69	203
TCGA_E7_A6MF	BLCA	age_at_initial_pathologic_diagnosis	< 69	204
TCGA_GV_A40G	BLCA	age_at_initial_pathologic_diagnosis	>= 69	203
TCGA_ZF_A9R1	BLCA	age_at_initial_pathologic_diagnosis	>= 69	203
TCGA_CF_A1HR	BLCA	age_at_initial_pathologic_diagnosis	< 69	204
TCGA_C4_A0F0	BLCA	age_at_initial_pathologic_diagnosis	< 69	204
TCGA_K4_A83P	BLCA	age_at_initial_pathologic_diagnosis	>= 69	203
TCGA_4Z_AA82	BLCA	age_at_initial_pathologic_diagnosis	< 69	204
TCGA_ZF_AA5P	BLCA	age_at_initial_pathologic_diagnosis	< 69	204
TCGA_BT_A2LD	BLCA	age_at_initial_pathologic_diagnosis	>= 69	203
TCGA_E7_A97P	BLCA	age_at_initial_pathologic_diagnosis	>= 69	203
TCGA_DK_A3IK	BLCA	age_at_initial_pathologic_diagnosis	>= 69	203
TCGA_DK_A1A7	BLCA	age_at_initial_pathologic_diagnosis	< 69	204
TCGA_XF_AAN1	BLCA	age_at_initial_pathologic_diagnosis	>= 69	203
TCGA_DK_A2I4	BLCA	age_at_initial_pathologic_diagnosis	>= 69	203
TCGA_GC_A3RB	BLCA	age_at_initial_pathologic_diagnosis	< 69	204
TCGA_UY_A9PH	BLCA	age_at_initial_pathologic_diagnosis	>= 69	203
TCGA_BT_A20W	BLCA	age_at_initial_pathologic_diagnosis	>= 69	203
TCGA_XF_A9T4	BLCA	age_at_initial_pathologic_diagnosis	< 69	204
TCGA_G2_A2EF	BLCA	age_at_initial_pathologic_diagnosis	< 69	204
TCGA_CF_A27C	BLCA	age_at_initial_pathologic_diagnosis	< 69	204
TCGA_LT_A5Z6	BLCA	age_at_initial_pathologic_diagnosis	< 69	204
TCGA_E7_A8O7	BLCA	age_at_initial_pathologic_diagnosis	< 69	204
TCGA_GC_A3YS	BLCA	age_at_initial_pathologic_diagnosis	< 69	204
TCGA_DK_A2I2	BLCA	age_at_initial_pathologic_diagnosis	< 69	204
TCGA_E7_A7DV	BLCA	age_at_initial_pathologic_diagnosis	< 69	204
TCGA_G2_A2EK	BLCA	age_at_initial_pathologic_diagnosis	< 69	204
TCGA_FD_A3B8	BLCA	age_at_initial_pathologic_diagnosis	< 69	204
TCGA_XF_A9SH	BLCA	age_at_initial_pathologic_diagnosis	< 69	204
TCGA_GV_A3JX	BLCA	age_at_initial_pathologic_diagnosis	< 69	204
TCGA_E5_A4U1	BLCA	age_at_initial_pathologic_diagnosis	>= 69	203
TCGA_GU_A764	BLCA	age_at_initial_pathologic_diagnosis	< 69	204
TCGA_CF_A9FH	BLCA	age_at_initial_pathologic_diagnosis	>= 69	203
TCGA_C4_A0EZ	BLCA	age_at_initial_pathologic_diagnosis	>= 69	203
TCGA_BL_A3JM	BLCA	age_at_initial_pathologic_diagnosis	< 69	204
TCGA_FD_A43S	BLCA	age_at_initial_pathologic_diagnosis	>= 69	203
TCGA_KQ_A41P	BLCA	age_at_initial_pathologic_diagnosis	>= 69	203
TCGA_ZF_A9R4	BLCA	age_at_initial_pathologic_diagnosis	>= 69	203
TCGA_K4_A6MB	BLCA	age_at_initial_pathologic_diagnosis	< 69	204
TCGA_FD_A3SP	BLCA	age_at_initial_pathologic_diagnosis	< 69	204
TCGA_K4_A5RH	BLCA	age_at_initial_pathologic_diagnosis	>= 69	203
TCGA_DK_AA77	BLCA	age_at_initial_pathologic_diagnosis	< 69	204
TCGA_FJ_A3ZF	BLCA	age_at_initial_pathologic_diagnosis	>= 69	203
TCGA_DK_A3IQ	BLCA	age_at_initial_pathologic_diagnosis	>= 69	203
TCGA_ZF_AA58	BLCA	age_at_initial_pathologic_diagnosis	< 69	204
TCGA_G2_A3IB	BLCA	age_at_initial_pathologic_diagnosis	< 69	204
TCGA_CF_A8HY	BLCA	age_at_initial_pathologic_diagnosis	< 69	204
TCGA_DK_A3WW	BLCA	age_at_initial_pathologic_diagnosis	< 69	204
TCGA_GD_A2C5	BLCA	age_at_initial_pathologic_diagnosis	< 69	204
TCGA_XF_AAN2	BLCA	age_at_initial_pathologic_diagnosis	>= 69	203
TCGA_G2_A2ES	BLCA	age_at_initial_pathologic_diagnosis	>= 69	203
TCGA_2F_A9KW	BLCA	age_at_initial_pathologic_diagnosis	< 69	204
TCGA_GV_A3QH	BLCA	age_at_initial_pathologic_diagnosis	< 69	204
TCGA_K4_A3WU	BLCA	age_at_initial_pathologic_diagnosis	>= 69	203
TCGA_GD_A6C6	BLCA	age_at_initial_pathologic_diagnosis	< 69	204
TCGA_BT_A3PK	BLCA	age_at_initial_pathologic_diagnosis	>= 69	203
TCGA_FT_A3EE	BLCA	age_at_initial_pathologic_diagnosis	>= 69	203
TCGA_DK_A3WY	BLCA	age_at_initial_pathologic_diagnosis	< 69	204
TCGA_UY_A9PE	BLCA	age_at_initial_pathologic_diagnosis	>= 69	203
TCGA_SY_A9G0	BLCA	age_at_initial_pathologic_diagnosis	>= 69	203
TCGA_XF_A8HC	BLCA	age_at_initial_pathologic_diagnosis	>= 69	203
TCGA_ZF_AA4R	BLCA	age_at_initial_pathologic_diagnosis	< 69	204
TCGA_UY_A78M	BLCA	age_at_initial_pathologic_diagnosis	>= 69	203
TCGA_S5_AA26	BLCA	age_at_initial_pathologic_diagnosis	< 69	204
TCGA_DK_A3X1	BLCA	age_at_initial_pathologic_diagnosis	>= 69	203
TCGA_XF_AAN7	BLCA	age_at_initial_pathologic_diagnosis	< 69	204
TCGA_XF_AAML	BLCA	age_at_initial_pathologic_diagnosis	>= 69	203
TCGA_C4_A0F7	BLCA	age_at_initial_pathologic_diagnosis	>= 69	203
TCGA_XF_AAMQ	BLCA	age_at_initial_pathologic_diagnosis	< 69	204
TCGA_G2_AA3C	BLCA	age_at_initial_pathologic_diagnosis	< 69	204
TCGA_FD_A3NA	BLCA	age_at_initial_pathologic_diagnosis	< 69	204
TCGA_E7_A519	BLCA	age_at_initial_pathologic_diagnosis	>= 69	203
TCGA_E7_A5KF	BLCA	age_at_initial_pathologic_diagnosis	< 69	204
TCGA_HQ_A5NE	BLCA	age_at_initial_pathologic_diagnosis	< 69	204
TCGA_FD_A6TK	BLCA	age_at_initial_pathologic_diagnosis	< 69	204
TCGA_ZF_AA4T	BLCA	age_at_initial_pathologic_diagnosis	< 69	204
TCGA_CU_A3KJ	BLCA	age_at_initial_pathologic_diagnosis	>= 69	203
TCGA_DK_AA6U	BLCA	age_at_initial_pathologic_diagnosis	< 69	204
TCGA_UY_A9PD	BLCA	age_at_initial_pathologic_diagnosis	>= 69	203
TCGA_ZF_AA53	BLCA	age_at_initial_pathologic_diagnosis	< 69	204
TCGA_BT_A42E	BLCA	age_at_initial_pathologic_diagnosis	>= 69	203
TCGA_ZF_AA54	BLCA	age_at_initial_pathologic_diagnosis	>= 69	203
TCGA_ZF_AA4U	BLCA	age_at_initial_pathologic_diagnosis	>= 69	203
TCGA_CF_A8HX	BLCA	age_at_initial_pathologic_diagnosis	< 69	204
TCGA_ZF_AA52	BLCA	age_at_initial_pathologic_diagnosis	>= 69	203
TCGA_BL_A13J	BLCA	age_at_initial_pathologic_diagnosis	< 69	204
TCGA_BL_A13J	BLCA	age_at_initial_pathologic_diagnosis	< 69	204
TCGA_XF_A8HE	BLCA	age_at_initial_pathologic_diagnosis	< 69	204
TCGA_GV_A3QI	BLCA	age_at_initial_pathologic_diagnosis	< 69	204
TCGA_K4_A6FZ	BLCA	age_at_initial_pathologic_diagnosis	>= 69	203
TCGA_XF_A9SV	BLCA	age_at_initial_pathologic_diagnosis	>= 69	203
TCGA_YF_AA3L	BLCA	age_at_initial_pathologic_diagnosis	< 69	204
TCGA_CU_A3YL	BLCA	age_at_initial_pathologic_diagnosis	< 69	204
TCGA_CU_A0YO	BLCA	age_at_initial_pathologic_diagnosis	>= 69	203
TCGA_FD_A5BX	BLCA	age_at_initial_pathologic_diagnosis	>= 69	203
TCGA_GU_A763	BLCA	age_at_initial_pathologic_diagnosis	>= 69	203
TCGA_UY_A78K	BLCA	age_at_initial_pathologic_diagnosis	< 69	204
TCGA_DK_A1AA	BLCA	age_at_initial_pathologic_diagnosis	< 69	204
TCGA_DK_A3IV	BLCA	age_at_initial_pathologic_diagnosis	< 69	204
TCGA_GC_A3WC	BLCA	age_at_initial_pathologic_diagnosis	>= 69	203
TCGA_FT_A61P	BLCA	age_at_initial_pathologic_diagnosis	>= 69	203
TCGA_E7_A7PW	BLCA	age_at_initial_pathologic_diagnosis	< 69	204
TCGA_DK_A1AB	BLCA	age_at_initial_pathologic_diagnosis	>= 69	203
TCGA_GC_A6I3	BLCA	age_at_initial_pathologic_diagnosis	>= 69	203
TCGA_FD_A3B7	BLCA	age_at_initial_pathologic_diagnosis	< 69	204
TCGA_FD_A3SL	BLCA	age_at_initial_pathologic_diagnosis	< 69	204
TCGA_DK_AA6X	BLCA	age_at_initial_pathologic_diagnosis	< 69	204
TCGA_K4_AAQO	BLCA	age_at_initial_pathologic_diagnosis	< 69	204
TCGA_GV_A3JV	BLCA	age_at_initial_pathologic_diagnosis	< 69	204
TCGA_GU_A766	BLCA	age_at_initial_pathologic_diagnosis	< 69	204
TCGA_GV_A6ZA	BLCA	age_at_initial_pathologic_diagnosis	< 69	204
TCGA_E7_A677	BLCA	age_at_initial_pathologic_diagnosis	>= 69	203
TCGA_E5_A2PC	BLCA	age_at_initial_pathologic_diagnosis	< 69	204
TCGA_FD_A3N5	BLCA	age_at_initial_pathologic_diagnosis	>= 69	203
TCGA_E7_A5KE	BLCA	age_at_initial_pathologic_diagnosis	>= 69	203
TCGA_UY_A78P	BLCA	age_at_initial_pathologic_diagnosis	>= 69	203
TCGA_FD_A3SQ	BLCA	age_at_initial_pathologic_diagnosis	< 69	204
TCGA_FD_A3SM	BLCA	age_at_initial_pathologic_diagnosis	>= 69	203
TCGA_CF_A5UA	BLCA	age_at_initial_pathologic_diagnosis	< 69	204
TCGA_XF_A9SP	BLCA	age_at_initial_pathologic_diagnosis	< 69	204
TCGA_DK_A1A6	BLCA	age_at_initial_pathologic_diagnosis	< 69	204
TCGA_FD_A62N	BLCA	age_at_initial_pathologic_diagnosis	>= 69	203
TCGA_CF_A47T	BLCA	age_at_initial_pathologic_diagnosis	< 69	204
TCGA_DK_A6B0	BLCA	age_at_initial_pathologic_diagnosis	< 69	204
TCGA_FD_A6TD	BLCA	age_at_initial_pathologic_diagnosis	>= 69	203
TCGA_BT_A0S7	BLCA	age_at_initial_pathologic_diagnosis	>= 69	203
TCGA_K4_A4AC	BLCA	age_at_initial_pathologic_diagnosis	>= 69	203
TCGA_XF_A9T6	BLCA	age_at_initial_pathologic_diagnosis	>= 69	203
TCGA_FD_A3SR	BLCA	age_at_initial_pathologic_diagnosis	< 69	204
TCGA_2F_A9KT	BLCA	age_at_initial_pathologic_diagnosis	>= 69	203
TCGA_UY_A78O	BLCA	age_at_initial_pathologic_diagnosis	>= 69	203
TCGA_XF_AAMJ	BLCA	age_at_initial_pathologic_diagnosis	>= 69	203
TCGA_FD_A43U	BLCA	age_at_initial_pathologic_diagnosis	>= 69	203
TCGA_FJ_A3Z7	BLCA	age_at_initial_pathologic_diagnosis	>= 69	203
TCGA_FD_A3SN	BLCA	age_at_initial_pathologic_diagnosis	>= 69	203
TCGA_4Z_AA80	BLCA	age_at_initial_pathologic_diagnosis	>= 69	203
TCGA_G2_A3IE	BLCA	age_at_initial_pathologic_diagnosis	< 69	204
TCGA_BT_A20N	BLCA	age_at_initial_pathologic_diagnosis	>= 69	203
TCGA_DK_A1A5	BLCA	age_at_initial_pathologic_diagnosis	>= 69	203
TCGA_HQ_A5ND	BLCA	age_at_initial_pathologic_diagnosis	>= 69	203
TCGA_FD_A6TH	BLCA	age_at_initial_pathologic_diagnosis	< 69	204
TCGA_FD_A3B5	BLCA	age_at_initial_pathologic_diagnosis	>= 69	203
TCGA_UY_A9PA	BLCA	age_at_initial_pathologic_diagnosis	< 69	204
TCGA_G2_A2EJ	BLCA	age_at_initial_pathologic_diagnosis	< 69	204
TCGA_KQ_A41S	BLCA	age_at_initial_pathologic_diagnosis	>= 69	203
TCGA_BT_A42C	BLCA	age_at_initial_pathologic_diagnosis	< 69	204
TCGA_BT_A2LA	BLCA	age_at_initial_pathologic_diagnosis	< 69	204
TCGA_ZF_A9R9	BLCA	age_at_initial_pathologic_diagnosis	< 69	204
TCGA_DK_A6AW	BLCA	age_at_initial_pathologic_diagnosis	>= 69	203
TCGA_UY_A78L	BLCA	age_at_initial_pathologic_diagnosis	< 69	204
TCGA_4Z_AA7N	BLCA	age_at_initial_pathologic_diagnosis	< 69	204
TCGA_YC_A9TC	BLCA	age_at_initial_pathologic_diagnosis	>= 69	203
TCGA_K4_A5RI	BLCA	age_at_initial_pathologic_diagnosis	< 69	204
TCGA_GU_A42R	BLCA	age_at_initial_pathologic_diagnosis	< 69	204
TCGA_CF_A3MH	BLCA	age_at_initial_pathologic_diagnosis	>= 69	203
TCGA_GD_A3OQ	BLCA	age_at_initial_pathologic_diagnosis	< 69	204
TCGA_E7_A7XN	BLCA	age_at_initial_pathologic_diagnosis	< 69	204
TCGA_E7_A3Y1	BLCA	age_at_initial_pathologic_diagnosis	< 69	204
TCGA_XF_A8HD	BLCA	age_at_initial_pathologic_diagnosis	>= 69	203
TCGA_XF_AAMG	BLCA	age_at_initial_pathologic_diagnosis	< 69	204
TCGA_FD_A5BT	BLCA	age_at_initial_pathologic_diagnosis	>= 69	203
TCGA_GC_A3OO	BLCA	age_at_initial_pathologic_diagnosis	>= 69	203
TCGA_5N_A9KI	BLCA	age_at_initial_pathologic_diagnosis	>= 69	203
TCGA_BT_A20U	BLCA	age_at_initial_pathologic_diagnosis	>= 69	203
TCGA_CF_A7I0	BLCA	age_at_initial_pathologic_diagnosis	< 69	204
TCGA_CF_A5U8	BLCA	age_at_initial_pathologic_diagnosis	< 69	204
TCGA_DK_A3IM	BLCA	age_at_initial_pathologic_diagnosis	>= 69	203
TCGA_ZF_A9RN	BLCA	age_at_initial_pathologic_diagnosis	< 69	204
TCGA_GC_A3RD	BLCA	age_at_initial_pathologic_diagnosis	>= 69	203
TCGA_E7_A97Q	BLCA	age_at_initial_pathologic_diagnosis	< 69	204
TCGA_ZF_A9RE	BLCA	age_at_initial_pathologic_diagnosis	>= 69	203
TCGA_XF_A9SM	BLCA	age_at_initial_pathologic_diagnosis	>= 69	203
TCGA_DK_AA76	BLCA	age_at_initial_pathologic_diagnosis	< 69	204
TCGA_PQ_A6FN	BLCA	age_at_initial_pathologic_diagnosis	>= 69	203
TCGA_FD_A3B4	BLCA	age_at_initial_pathologic_diagnosis	< 69	204
TCGA_HQ_A2OE	BLCA	age_at_initial_pathologic_diagnosis	>= 69	203
TCGA_XF_A9T5	BLCA	age_at_initial_pathologic_diagnosis	>= 69	203
TCGA_4Z_AA89	BLCA	age_at_initial_pathologic_diagnosis	< 69	204
TCGA_ZF_AA4X	BLCA	age_at_initial_pathologic_diagnosis	< 69	204
TCGA_XF_AAME	BLCA	age_at_initial_pathologic_diagnosis	< 69	204
TCGA_XF_AAMH	BLCA	age_at_initial_pathologic_diagnosis	>= 69	203
TCGA_FD_A3SS	BLCA	age_at_initial_pathologic_diagnosis	< 69	204
TCGA_XF_AAN5	BLCA	age_at_initial_pathologic_diagnosis	< 69	204
TCGA_FJ_A3ZE	BLCA	age_at_initial_pathologic_diagnosis	< 69	204
TCGA_XF_A9SK	BLCA	age_at_initial_pathologic_diagnosis	< 69	204
TCGA_CU_A0YN	BLCA	age_at_initial_pathologic_diagnosis	< 69	204
TCGA_GV_A3QG	BLCA	age_at_initial_pathologic_diagnosis	< 69	204
TCGA_XF_A9SJ	BLCA	age_at_initial_pathologic_diagnosis	>= 69	203
TCGA_XF_A9SW	BLCA	age_at_initial_pathologic_diagnosis	>= 69	203
TCGA_XF_A8HG	BLCA	age_at_initial_pathologic_diagnosis	>= 69	203
TCGA_XF_A9T3	BLCA	age_at_initial_pathologic_diagnosis	>= 69	203
TCGA_GV_A3JZ	BLCA	age_at_initial_pathologic_diagnosis	< 69	204
TCGA_GV_A3QF	BLCA	age_at_initial_pathologic_diagnosis	>= 69	203
TCGA_DK_AA6S	BLCA	age_at_initial_pathologic_diagnosis	< 69	204
TCGA_FD_A43P	BLCA	age_at_initial_pathologic_diagnosis	>= 69	203
TCGA_LC_A66R	BLCA	age_at_initial_pathologic_diagnosis	>= 69	203
TCGA_GV_A3QK	BLCA	age_at_initial_pathologic_diagnosis	< 69	204
TCGA_E5_A4TZ	BLCA	age_at_initial_pathologic_diagnosis	< 69	204
TCGA_DK_A1AD	BLCA	age_at_initial_pathologic_diagnosis	>= 69	203
TCGA_K4_A3WV	BLCA	age_at_initial_pathologic_diagnosis	>= 69	203
TCGA_CU_A0YR	BLCA	age_at_initial_pathologic_diagnosis	>= 69	203
TCGA_FD_A6TC	BLCA	age_at_initial_pathologic_diagnosis	>= 69	203
TCGA_FD_A3N6	BLCA	age_at_initial_pathologic_diagnosis	< 69	204
TCGA_GU_AATP	BLCA	age_at_initial_pathologic_diagnosis	>= 69	203
TCGA_FD_A6TB	BLCA	age_at_initial_pathologic_diagnosis	>= 69	203
TCGA_FD_A3B6	BLCA	age_at_initial_pathologic_diagnosis	>= 69	203
TCGA_FD_A5BR	BLCA	age_at_initial_pathologic_diagnosis	< 69	204
TCGA_DK_A3IN	BLCA	age_at_initial_pathologic_diagnosis	>= 69	203
TCGA_DK_AA74	BLCA	age_at_initial_pathologic_diagnosis	>= 69	203
TCGA_CF_A47S	BLCA	age_at_initial_pathologic_diagnosis	< 69	204
TCGA_GU_A767	BLCA	age_at_initial_pathologic_diagnosis	>= 69	203
TCGA_DK_A2HX	BLCA	age_at_initial_pathologic_diagnosis	>= 69	203
TCGA_FD_A3SO	BLCA	age_at_initial_pathologic_diagnosis	< 69	204
TCGA_BT_A3PH	BLCA	age_at_initial_pathologic_diagnosis	>= 69	203
TCGA_DK_AA6L	BLCA	age_at_initial_pathologic_diagnosis	< 69	204
TCGA_XF_AAN0	BLCA	age_at_initial_pathologic_diagnosis	< 69	204
TCGA_FD_A6TA	BLCA	age_at_initial_pathologic_diagnosis	< 69	204
TCGA_ZF_A9RL	BLCA	age_at_initial_pathologic_diagnosis	< 69	204
TCGA_DK_A2I1	BLCA	age_at_initial_pathologic_diagnosis	>= 69	203
TCGA_BT_A20T	BLCA	age_at_initial_pathologic_diagnosis	< 69	204
TCGA_4Z_AA7O	BLCA	age_at_initial_pathologic_diagnosis	< 69	204
TCGA_ZF_AA4V	BLCA	age_at_initial_pathologic_diagnosis	< 69	204
TCGA_ZF_AA56	BLCA	age_at_initial_pathologic_diagnosis	>= 69	203
TCGA_CU_A72E	BLCA	age_at_initial_pathologic_diagnosis	>= 69	203
TCGA_DK_AA6W	BLCA	age_at_initial_pathologic_diagnosis	>= 69	203
TCGA_DK_A3IS	BLCA	age_at_initial_pathologic_diagnosis	< 69	204
TCGA_4Z_AA7S	BLCA	age_at_initial_pathologic_diagnosis	< 69	204
TCGA_ZF_AA5H	BLCA	age_at_initial_pathologic_diagnosis	< 69	204
TCGA_ZF_AA5N	BLCA	age_at_initial_pathologic_diagnosis	< 69	204
TCGA_FD_A43N	BLCA	age_at_initial_pathologic_diagnosis	>= 69	203
TCGA_DK_A6B2	BLCA	age_at_initial_pathologic_diagnosis	>= 69	203
TCGA_DK_A3IU	BLCA	age_at_initial_pathologic_diagnosis	< 69	204
TCGA_DK_A6AV	BLCA	age_at_initial_pathologic_diagnosis	>= 69	203
TCGA_DK_A2I6	BLCA	diagnosis_subtype	Non-Papillary	270
TCGA_FD_A43X	BLCA	diagnosis_subtype	Papillary	132
TCGA_GC_A4ZW	BLCA	diagnosis_subtype	Non-Papillary	270
TCGA_FD_A5C0	BLCA	diagnosis_subtype	Non-Papillary	270
TCGA_GU_AATO	BLCA	diagnosis_subtype	Papillary	132
TCGA_H4_A2HQ	BLCA	diagnosis_subtype	Non-Papillary	270
TCGA_XF_A9SL	BLCA	diagnosis_subtype	Non-Papillary	270
TCGA_4Z_AA7Y	BLCA	diagnosis_subtype	Papillary	132
TCGA_2F_A9KP	BLCA	diagnosis_subtype	Non-Papillary	270
TCGA_K4_A54R	BLCA	diagnosis_subtype	Papillary	132
TCGA_BT_A2LB	BLCA	diagnosis_subtype	Non-Papillary	270
TCGA_GU_A42Q	BLCA	diagnosis_subtype	Non-Papillary	270
TCGA_XF_AAMR	BLCA	diagnosis_subtype	Non-Papillary	270
TCGA_FD_A5BS	BLCA	diagnosis_subtype	Non-Papillary	270
TCGA_G2_A3VY	BLCA	diagnosis_subtype	Non-Papillary	270
TCGA_4Z_AA7W	BLCA	diagnosis_subtype	Non-Papillary	270
TCGA_DK_A1AC	BLCA	diagnosis_subtype	Non-Papillary	270
TCGA_FJ_A871	BLCA	diagnosis_subtype	Non-Papillary	270
TCGA_E7_A85H	BLCA	diagnosis_subtype	Non-Papillary	270
TCGA_CF_A3MG	BLCA	diagnosis_subtype	Papillary	132
TCGA_FD_A6TG	BLCA	diagnosis_subtype	Non-Papillary	270
TCGA_CF_A47Y	BLCA	diagnosis_subtype	Papillary	132
TCGA_DK_A3IL	BLCA	diagnosis_subtype	Non-Papillary	270
TCGA_CF_A47X	BLCA	diagnosis_subtype	Papillary	132
TCGA_G2_AA3F	BLCA	diagnosis_subtype	Non-Papillary	270
TCGA_UY_A8OC	BLCA	diagnosis_subtype	Non-Papillary	270
TCGA_XF_A9T8	BLCA	diagnosis_subtype	Non-Papillary	270
TCGA_DK_AA6M	BLCA	diagnosis_subtype	Non-Papillary	270
TCGA_DK_A1AF	BLCA	diagnosis_subtype	Non-Papillary	270
TCGA_FD_A6TI	BLCA	diagnosis_subtype	Non-Papillary	270
TCGA_BL_A5ZZ	BLCA	diagnosis_subtype	Papillary	132
TCGA_C4_A0F6	BLCA	diagnosis_subtype	Non-Papillary	270
TCGA_FD_A62P	BLCA	diagnosis_subtype	Non-Papillary	270
TCGA_XF_A8HB	BLCA	diagnosis_subtype	Papillary	132
TCGA_K4_A4AB	BLCA	diagnosis_subtype	Non-Papillary	270
TCGA_CF_A9FL	BLCA	diagnosis_subtype	Papillary	132
TCGA_DK_A1AG	BLCA	diagnosis_subtype	Papillary	132
TCGA_GC_A3BM	BLCA	diagnosis_subtype	Non-Papillary	270
TCGA_FD_A5BV	BLCA	diagnosis_subtype	Non-Papillary	270
TCGA_BT_A20Q	BLCA	diagnosis_subtype	Non-Papillary	270
TCGA_E7_A6ME	BLCA	diagnosis_subtype	Non-Papillary	270
TCGA_SY_A9G5	BLCA	diagnosis_subtype	Papillary	132
TCGA_G2_A2EO	BLCA	diagnosis_subtype	Non-Papillary	270
TCGA_CF_A9FM	BLCA	diagnosis_subtype	Papillary	132
TCGA_CF_A47W	BLCA	diagnosis_subtype	Papillary	132
TCGA_XF_A8HI	BLCA	diagnosis_subtype	Papillary	132
TCGA_E7_A4XJ	BLCA	diagnosis_subtype	Non-Papillary	270
TCGA_DK_AA75	BLCA	diagnosis_subtype	Non-Papillary	270
TCGA_FD_A3SJ	BLCA	diagnosis_subtype	Non-Papillary	270
TCGA_4Z_AA81	BLCA	diagnosis_subtype	Papillary	132
TCGA_G2_A2EC	BLCA	diagnosis_subtype	Non-Papillary	270
TCGA_FD_A6TE	BLCA	diagnosis_subtype	Non-Papillary	270
TCGA_E7_A8O8	BLCA	diagnosis_subtype	Non-Papillary	270
TCGA_ZF_A9RM	BLCA	diagnosis_subtype	Papillary	132
TCGA_FD_A62O	BLCA	diagnosis_subtype	Non-Papillary	270
TCGA_2F_A9KO	BLCA	diagnosis_subtype	Non-Papillary	270
TCGA_DK_A3WX	BLCA	diagnosis_subtype	Non-Papillary	270
TCGA_DK_AA6T	BLCA	diagnosis_subtype	Non-Papillary	270
TCGA_DK_A1AE	BLCA	diagnosis_subtype	Non-Papillary	270
TCGA_R3_A69X	BLCA	diagnosis_subtype	Non-Papillary	270
TCGA_XF_A9T2	BLCA	diagnosis_subtype	Non-Papillary	270
TCGA_4Z_AA83	BLCA	diagnosis_subtype	Papillary	132
TCGA_KQ_A41R	BLCA	diagnosis_subtype	Papillary	132
TCGA_UY_A78N	BLCA	diagnosis_subtype	Non-Papillary	270
TCGA_DK_AA6R	BLCA	diagnosis_subtype	Non-Papillary	270
TCGA_GC_A6I1	BLCA	diagnosis_subtype	Non-Papillary	270
TCGA_XF_AAN4	BLCA	diagnosis_subtype	Non-Papillary	270
TCGA_BL_A13I	BLCA	diagnosis_subtype	Non-Papillary	270
TCGA_BL_A13I	BLCA	diagnosis_subtype	Non-Papillary	270
TCGA_S5_A6DX	BLCA	diagnosis_subtype	Non-Papillary	270
TCGA_DK_A6B6	BLCA	diagnosis_subtype	Papillary	132
TCGA_YF_AA3M	BLCA	diagnosis_subtype	Non-Papillary	270
TCGA_ZF_A9R7	BLCA	diagnosis_subtype	Non-Papillary	270
TCGA_GC_A3RC	BLCA	diagnosis_subtype	Non-Papillary	270
TCGA_CF_A3MF	BLCA	diagnosis_subtype	Papillary	132
TCGA_4Z_AA7R	BLCA	diagnosis_subtype	Papillary	132
TCGA_XF_A9SZ	BLCA	diagnosis_subtype	Non-Papillary	270
TCGA_DK_A3IT	BLCA	diagnosis_subtype	Non-Papillary	270
TCGA_XF_AAMZ	BLCA	diagnosis_subtype	Papillary	132
TCGA_G2_AA3D	BLCA	diagnosis_subtype	Non-Papillary	270
TCGA_K4_A5RJ	BLCA	diagnosis_subtype	Papillary	132
TCGA_G2_A2EL	BLCA	diagnosis_subtype	Non-Papillary	270
TCGA_CU_A3QU	BLCA	diagnosis_subtype	Non-Papillary	270
TCGA_FD_A5C1	BLCA	diagnosis_subtype	Non-Papillary	270
TCGA_GD_A76B	BLCA	diagnosis_subtype	Papillary	132
TCGA_GU_AATQ	BLCA	diagnosis_subtype	Non-Papillary	270
TCGA_FD_A5BZ	BLCA	diagnosis_subtype	Non-Papillary	270
TCGA_MV_A51V	BLCA	diagnosis_subtype	Papillary	132
TCGA_BT_A20P	BLCA	diagnosis_subtype	Non-Papillary	270
TCGA_2F_A9KQ	BLCA	diagnosis_subtype	Non-Papillary	270
TCGA_BT_A3PJ	BLCA	diagnosis_subtype	Papillary	132
TCGA_BT_A20O	BLCA	diagnosis_subtype	Non-Papillary	270
TCGA_BT_A20R	BLCA	diagnosis_subtype	Non-Papillary	270
TCGA_GV_A3JW	BLCA	diagnosis_subtype	Non-Papillary	270
TCGA_BT_A20V	BLCA	diagnosis_subtype	Non-Papillary	270
TCGA_PQ_A6FI	BLCA	diagnosis_subtype	Non-Papillary	270
TCGA_UY_A9PB	BLCA	diagnosis_subtype	Non-Papillary	270
TCGA_CF_A9FF	BLCA	diagnosis_subtype	Papillary	132
TCGA_XF_AAN3	BLCA	diagnosis_subtype	Non-Papillary	270
TCGA_ZF_A9RD	BLCA	diagnosis_subtype	Non-Papillary	270
TCGA_KQ_A41O	BLCA	diagnosis_subtype	Papillary	132
TCGA_XF_AAMY	BLCA	diagnosis_subtype	Papillary	132
TCGA_GU_A42P	BLCA	diagnosis_subtype	Papillary	132
TCGA_FD_A6TF	BLCA	diagnosis_subtype	Non-Papillary	270
TCGA_GD_A3OS	BLCA	diagnosis_subtype	Non-Papillary	270
TCGA_XF_A8HH	BLCA	diagnosis_subtype	Non-Papillary	270
TCGA_G2_AA3B	BLCA	diagnosis_subtype	Non-Papillary	270
TCGA_ZF_A9R2	BLCA	diagnosis_subtype	Papillary	132
TCGA_C4_A0F1	BLCA	diagnosis_subtype	Non-Papillary	270
TCGA_ZF_A9RF	BLCA	diagnosis_subtype	Non-Papillary	270
TCGA_KQ_A41Q	BLCA	diagnosis_subtype	Non-Papillary	270
TCGA_UY_A9PF	BLCA	diagnosis_subtype	Papillary	132
TCGA_ZF_AA4W	BLCA	diagnosis_subtype	Non-Papillary	270
TCGA_H4_A2HO	BLCA	diagnosis_subtype	Papillary	132
TCGA_H4_A2HO	BLCA	diagnosis_subtype	Papillary	132
TCGA_FJ_A3Z9	BLCA	diagnosis_subtype	Papillary	132
TCGA_XF_A9ST	BLCA	diagnosis_subtype	Papillary	132
TCGA_UY_A8OB	BLCA	diagnosis_subtype	Non-Papillary	270
TCGA_E7_A4IJ	BLCA	diagnosis_subtype	Papillary	132
TCGA_DK_A6B5	BLCA	diagnosis_subtype	Non-Papillary	270
TCGA_YC_A8S6	BLCA	diagnosis_subtype	Papillary	132
TCGA_BL_A0C8	BLCA	diagnosis_subtype	Non-Papillary	270
TCGA_BL_A0C8	BLCA	diagnosis_subtype	Non-Papillary	270
TCGA_DK_AA71	BLCA	diagnosis_subtype	Papillary	132
TCGA_FD_A43Y	BLCA	diagnosis_subtype	Non-Papillary	270
TCGA_FD_A62S	BLCA	diagnosis_subtype	Non-Papillary	270
TCGA_BT_A0YX	BLCA	diagnosis_subtype	Non-Papillary	270
TCGA_XF_AAMT	BLCA	diagnosis_subtype	Non-Papillary	270
TCGA_GV_A40E	BLCA	diagnosis_subtype	Non-Papillary	270
TCGA_GC_A3I6	BLCA	diagnosis_subtype	Non-Papillary	270
TCGA_ZF_A9RC	BLCA	diagnosis_subtype	Non-Papillary	270
TCGA_E7_A7DU	BLCA	diagnosis_subtype	Papillary	132
TCGA_YC_A89H	BLCA	diagnosis_subtype	Non-Papillary	270
TCGA_CF_A3MI	BLCA	diagnosis_subtype	Papillary	132
TCGA_XF_A9SI	BLCA	diagnosis_subtype	Papillary	132
TCGA_E7_A3X6	BLCA	diagnosis_subtype	Papillary	132
TCGA_XF_A9SY	BLCA	diagnosis_subtype	Non-Papillary	270
TCGA_KQ_A41N	BLCA	diagnosis_subtype	Papillary	132
TCGA_ZF_A9R3	BLCA	diagnosis_subtype	Papillary	132
TCGA_DK_AA6P	BLCA	diagnosis_subtype	Papillary	132
TCGA_4Z_AA86	BLCA	diagnosis_subtype	Non-Papillary	270
TCGA_4Z_AA7M	BLCA	diagnosis_subtype	Non-Papillary	270
TCGA_BT_A42F	BLCA	diagnosis_subtype	Non-Papillary	270
TCGA_E7_A678	BLCA	diagnosis_subtype	Non-Papillary	270
TCGA_GU_A762	BLCA	diagnosis_subtype	Non-Papillary	270
TCGA_DK_AA6Q	BLCA	diagnosis_subtype	Non-Papillary	270
TCGA_DK_A6B1	BLCA	diagnosis_subtype	Papillary	132
TCGA_XF_A9SX	BLCA	diagnosis_subtype	Non-Papillary	270
TCGA_E7_A6MD	BLCA	diagnosis_subtype	Non-Papillary	270
TCGA_4Z_AA7Q	BLCA	diagnosis_subtype	Non-Papillary	270
TCGA_DK_A3X2	BLCA	diagnosis_subtype	Papillary	132
TCGA_UY_A8OD	BLCA	diagnosis_subtype	Non-Papillary	270
TCGA_ZF_A9R5	BLCA	diagnosis_subtype	Papillary	132
TCGA_ZF_A9R0	BLCA	diagnosis_subtype	Non-Papillary	270
TCGA_LT_A8JT	BLCA	diagnosis_subtype	Papillary	132
TCGA_BT_A20X	BLCA	diagnosis_subtype	Non-Papillary	270
TCGA_K4_A3WS	BLCA	diagnosis_subtype	Non-Papillary	270
TCGA_CF_A47V	BLCA	diagnosis_subtype	Papillary	132
TCGA_FD_A5BU	BLCA	diagnosis_subtype	Non-Papillary	270
TCGA_XF_A8HF	BLCA	diagnosis_subtype	Non-Papillary	270
TCGA_BT_A20J	BLCA	diagnosis_subtype	Non-Papillary	270
TCGA_GD_A3OP	BLCA	diagnosis_subtype	Papillary	132
TCGA_CU_A5W6	BLCA	diagnosis_subtype	Non-Papillary	270
TCGA_4Z_AA84	BLCA	diagnosis_subtype	Papillary	132
TCGA_XF_AAMW	BLCA	diagnosis_subtype	Non-Papillary	270
TCGA_5N_A9KM	BLCA	diagnosis_subtype	Non-Papillary	270
TCGA_E7_A541	BLCA	diagnosis_subtype	Papillary	132
TCGA_XF_A9T0	BLCA	diagnosis_subtype	Non-Papillary	270
TCGA_2F_A9KR	BLCA	diagnosis_subtype	Non-Papillary	270
TCGA_XF_AAMX	BLCA	diagnosis_subtype	Non-Papillary	270
TCGA_4Z_AA87	BLCA	diagnosis_subtype	Non-Papillary	270
TCGA_XF_A9SU	BLCA	diagnosis_subtype	Papillary	132
TCGA_ZF_AA51	BLCA	diagnosis_subtype	Papillary	132
TCGA_E7_A6MF	BLCA	diagnosis_subtype	Papillary	132
TCGA_GV_A40G	BLCA	diagnosis_subtype	Non-Papillary	270
TCGA_ZF_A9R1	BLCA	diagnosis_subtype	Non-Papillary	270
TCGA_CF_A1HR	BLCA	diagnosis_subtype	Non-Papillary	270
TCGA_C4_A0F0	BLCA	diagnosis_subtype	Non-Papillary	270
TCGA_K4_A83P	BLCA	diagnosis_subtype	Non-Papillary	270
TCGA_4Z_AA82	BLCA	diagnosis_subtype	Non-Papillary	270
TCGA_ZF_AA5P	BLCA	diagnosis_subtype	Non-Papillary	270
TCGA_BT_A2LD	BLCA	diagnosis_subtype	Non-Papillary	270
TCGA_E7_A97P	BLCA	diagnosis_subtype	Non-Papillary	270
TCGA_DK_A3IK	BLCA	diagnosis_subtype	Papillary	132
TCGA_DK_A1A7	BLCA	diagnosis_subtype	Non-Papillary	270
TCGA_XF_AAN1	BLCA	diagnosis_subtype	Papillary	132
TCGA_DK_A2I4	BLCA	diagnosis_subtype	Papillary	132
TCGA_GC_A3RB	BLCA	diagnosis_subtype	Non-Papillary	270
TCGA_UY_A9PH	BLCA	diagnosis_subtype	Non-Papillary	270
TCGA_BT_A20W	BLCA	diagnosis_subtype	Non-Papillary	270
TCGA_XF_A9T4	BLCA	diagnosis_subtype	Non-Papillary	270
TCGA_G2_A2EF	BLCA	diagnosis_subtype	Non-Papillary	270
TCGA_CF_A27C	BLCA	diagnosis_subtype	Papillary	132
TCGA_LT_A5Z6	BLCA	diagnosis_subtype	Non-Papillary	270
TCGA_E7_A8O7	BLCA	diagnosis_subtype	Papillary	132
TCGA_GC_A3YS	BLCA	diagnosis_subtype	Non-Papillary	270
TCGA_DK_A2I2	BLCA	diagnosis_subtype	Non-Papillary	270
TCGA_E7_A7DV	BLCA	diagnosis_subtype	Papillary	132
TCGA_G2_A2EK	BLCA	diagnosis_subtype	Non-Papillary	270
TCGA_FD_A3B8	BLCA	diagnosis_subtype	Non-Papillary	270
TCGA_XF_A9SH	BLCA	diagnosis_subtype	Non-Papillary	270
TCGA_GV_A3JX	BLCA	diagnosis_subtype	Non-Papillary	270
TCGA_E5_A4U1	BLCA	diagnosis_subtype	Papillary	132
TCGA_GU_A764	BLCA	diagnosis_subtype	Non-Papillary	270
TCGA_CF_A9FH	BLCA	diagnosis_subtype	Papillary	132
TCGA_C4_A0EZ	BLCA	diagnosis_subtype	Non-Papillary	270
TCGA_FD_A43S	BLCA	diagnosis_subtype	Non-Papillary	270
TCGA_KQ_A41P	BLCA	diagnosis_subtype	Non-Papillary	270
TCGA_ZF_A9R4	BLCA	diagnosis_subtype	Non-Papillary	270
TCGA_K4_A6MB	BLCA	diagnosis_subtype	Non-Papillary	270
TCGA_FD_A3SP	BLCA	diagnosis_subtype	Non-Papillary	270
TCGA_K4_A5RH	BLCA	diagnosis_subtype	Non-Papillary	270
TCGA_DK_AA77	BLCA	diagnosis_subtype	Papillary	132
TCGA_FJ_A3ZF	BLCA	diagnosis_subtype	Papillary	132
TCGA_DK_A3IQ	BLCA	diagnosis_subtype	Papillary	132
TCGA_ZF_AA58	BLCA	diagnosis_subtype	Non-Papillary	270
TCGA_G2_A3IB	BLCA	diagnosis_subtype	Non-Papillary	270
TCGA_CF_A8HY	BLCA	diagnosis_subtype	Papillary	132
TCGA_DK_A3WW	BLCA	diagnosis_subtype	Papillary	132
TCGA_GD_A2C5	BLCA	diagnosis_subtype	Papillary	132
TCGA_XF_AAN2	BLCA	diagnosis_subtype	Non-Papillary	270
TCGA_G2_A2ES	BLCA	diagnosis_subtype	Non-Papillary	270
TCGA_2F_A9KW	BLCA	diagnosis_subtype	Non-Papillary	270
TCGA_GV_A3QH	BLCA	diagnosis_subtype	Non-Papillary	270
TCGA_K4_A3WU	BLCA	diagnosis_subtype	Non-Papillary	270
TCGA_GD_A6C6	BLCA	diagnosis_subtype	Papillary	132
TCGA_BT_A3PK	BLCA	diagnosis_subtype	Papillary	132
TCGA_FT_A3EE	BLCA	diagnosis_subtype	Papillary	132
TCGA_DK_A3WY	BLCA	diagnosis_subtype	Non-Papillary	270
TCGA_UY_A9PE	BLCA	diagnosis_subtype	Non-Papillary	270
TCGA_SY_A9G0	BLCA	diagnosis_subtype	Papillary	132
TCGA_XF_A8HC	BLCA	diagnosis_subtype	Papillary	132
TCGA_ZF_AA4R	BLCA	diagnosis_subtype	Non-Papillary	270
TCGA_UY_A78M	BLCA	diagnosis_subtype	Non-Papillary	270
TCGA_S5_AA26	BLCA	diagnosis_subtype	Papillary	132
TCGA_DK_A3X1	BLCA	diagnosis_subtype	Non-Papillary	270
TCGA_XF_AAN7	BLCA	diagnosis_subtype	Non-Papillary	270
TCGA_XF_AAML	BLCA	diagnosis_subtype	Papillary	132
TCGA_C4_A0F7	BLCA	diagnosis_subtype	Non-Papillary	270
TCGA_XF_AAMQ	BLCA	diagnosis_subtype	Papillary	132
TCGA_G2_AA3C	BLCA	diagnosis_subtype	Non-Papillary	270
TCGA_FD_A3NA	BLCA	diagnosis_subtype	Non-Papillary	270
TCGA_E7_A519	BLCA	diagnosis_subtype	Papillary	132
TCGA_E7_A5KF	BLCA	diagnosis_subtype	Non-Papillary	270
TCGA_HQ_A5NE	BLCA	diagnosis_subtype	Non-Papillary	270
TCGA_FD_A6TK	BLCA	diagnosis_subtype	Non-Papillary	270
TCGA_ZF_AA4T	BLCA	diagnosis_subtype	Non-Papillary	270
TCGA_CU_A3KJ	BLCA	diagnosis_subtype	Non-Papillary	270
TCGA_DK_AA6U	BLCA	diagnosis_subtype	Papillary	132
TCGA_UY_A9PD	BLCA	diagnosis_subtype	Non-Papillary	270
TCGA_ZF_AA53	BLCA	diagnosis_subtype	Non-Papillary	270
TCGA_BT_A42E	BLCA	diagnosis_subtype	Non-Papillary	270
TCGA_ZF_AA54	BLCA	diagnosis_subtype	Non-Papillary	270
TCGA_ZF_AA4U	BLCA	diagnosis_subtype	Non-Papillary	270
TCGA_CF_A8HX	BLCA	diagnosis_subtype	Papillary	132
TCGA_ZF_AA52	BLCA	diagnosis_subtype	Papillary	132
TCGA_BL_A13J	BLCA	diagnosis_subtype	Papillary	132
TCGA_BL_A13J	BLCA	diagnosis_subtype	Papillary	132
TCGA_XF_A8HE	BLCA	diagnosis_subtype	Non-Papillary	270
TCGA_GV_A3QI	BLCA	diagnosis_subtype	Papillary	132
TCGA_K4_A6FZ	BLCA	diagnosis_subtype	Non-Papillary	270
TCGA_XF_A9SV	BLCA	diagnosis_subtype	Papillary	132
TCGA_YF_AA3L	BLCA	diagnosis_subtype	Non-Papillary	270
TCGA_CU_A3YL	BLCA	diagnosis_subtype	Papillary	132
TCGA_CU_A0YO	BLCA	diagnosis_subtype	Non-Papillary	270
TCGA_FD_A5BX	BLCA	diagnosis_subtype	Non-Papillary	270
TCGA_GU_A763	BLCA	diagnosis_subtype	Papillary	132
TCGA_UY_A78K	BLCA	diagnosis_subtype	Papillary	132
TCGA_DK_A1AA	BLCA	diagnosis_subtype	Papillary	132
TCGA_DK_A3IV	BLCA	diagnosis_subtype	Non-Papillary	270
TCGA_GC_A3WC	BLCA	diagnosis_subtype	Non-Papillary	270
TCGA_FT_A61P	BLCA	diagnosis_subtype	Papillary	132
TCGA_E7_A7PW	BLCA	diagnosis_subtype	Non-Papillary	270
TCGA_DK_A1AB	BLCA	diagnosis_subtype	Non-Papillary	270
TCGA_GC_A6I3	BLCA	diagnosis_subtype	Non-Papillary	270
TCGA_FD_A3B7	BLCA	diagnosis_subtype	Non-Papillary	270
TCGA_FD_A3SL	BLCA	diagnosis_subtype	Non-Papillary	270
TCGA_DK_AA6X	BLCA	diagnosis_subtype	Papillary	132
TCGA_K4_AAQO	BLCA	diagnosis_subtype	Non-Papillary	270
TCGA_GV_A3JV	BLCA	diagnosis_subtype	Non-Papillary	270
TCGA_GU_A766	BLCA	diagnosis_subtype	Non-Papillary	270
TCGA_GV_A6ZA	BLCA	diagnosis_subtype	Papillary	132
TCGA_E7_A677	BLCA	diagnosis_subtype	Non-Papillary	270
TCGA_E5_A2PC	BLCA	diagnosis_subtype	Non-Papillary	270
TCGA_FD_A3N5	BLCA	diagnosis_subtype	Non-Papillary	270
TCGA_E7_A5KE	BLCA	diagnosis_subtype	Non-Papillary	270
TCGA_UY_A78P	BLCA	diagnosis_subtype	Non-Papillary	270
TCGA_FD_A3SQ	BLCA	diagnosis_subtype	Non-Papillary	270
TCGA_FD_A3SM	BLCA	diagnosis_subtype	Papillary	132
TCGA_CF_A5UA	BLCA	diagnosis_subtype	Papillary	132
TCGA_XF_A9SP	BLCA	diagnosis_subtype	Non-Papillary	270
TCGA_DK_A1A6	BLCA	diagnosis_subtype	Non-Papillary	270
TCGA_FD_A62N	BLCA	diagnosis_subtype	Non-Papillary	270
TCGA_CF_A47T	BLCA	diagnosis_subtype	Papillary	132
TCGA_DK_A6B0	BLCA	diagnosis_subtype	Papillary	132
TCGA_FD_A6TD	BLCA	diagnosis_subtype	Non-Papillary	270
TCGA_BT_A0S7	BLCA	diagnosis_subtype	Non-Papillary	270
TCGA_K4_A4AC	BLCA	diagnosis_subtype	Non-Papillary	270
TCGA_XF_A9T6	BLCA	diagnosis_subtype	Papillary	132
TCGA_FD_A3SR	BLCA	diagnosis_subtype	Non-Papillary	270
TCGA_2F_A9KT	BLCA	diagnosis_subtype	Non-Papillary	270
TCGA_UY_A78O	BLCA	diagnosis_subtype	Non-Papillary	270
TCGA_XF_AAMJ	BLCA	diagnosis_subtype	Non-Papillary	270
TCGA_FD_A43U	BLCA	diagnosis_subtype	Non-Papillary	270
TCGA_FJ_A3Z7	BLCA	diagnosis_subtype	Non-Papillary	270
TCGA_FD_A3SN	BLCA	diagnosis_subtype	Papillary	132
TCGA_4Z_AA80	BLCA	diagnosis_subtype	Papillary	132
TCGA_G2_A3IE	BLCA	diagnosis_subtype	Non-Papillary	270
TCGA_BT_A20N	BLCA	diagnosis_subtype	Non-Papillary	270
TCGA_DK_A1A5	BLCA	diagnosis_subtype	Non-Papillary	270
TCGA_FD_A6TH	BLCA	diagnosis_subtype	Non-Papillary	270
TCGA_FD_A3B5	BLCA	diagnosis_subtype	Non-Papillary	270
TCGA_UY_A9PA	BLCA	diagnosis_subtype	Non-Papillary	270
TCGA_G2_A2EJ	BLCA	diagnosis_subtype	Non-Papillary	270
TCGA_KQ_A41S	BLCA	diagnosis_subtype	Papillary	132
TCGA_BT_A42C	BLCA	diagnosis_subtype	Papillary	132
TCGA_BT_A2LA	BLCA	diagnosis_subtype	Non-Papillary	270
TCGA_ZF_A9R9	BLCA	diagnosis_subtype	Non-Papillary	270
TCGA_DK_A6AW	BLCA	diagnosis_subtype	Non-Papillary	270
TCGA_UY_A78L	BLCA	diagnosis_subtype	Papillary	132
TCGA_4Z_AA7N	BLCA	diagnosis_subtype	Non-Papillary	270
TCGA_YC_A9TC	BLCA	diagnosis_subtype	Papillary	132
TCGA_K4_A5RI	BLCA	diagnosis_subtype	Non-Papillary	270
TCGA_GU_A42R	BLCA	diagnosis_subtype	Papillary	132
TCGA_CF_A3MH	BLCA	diagnosis_subtype	Papillary	132
TCGA_GD_A3OQ	BLCA	diagnosis_subtype	Papillary	132
TCGA_E7_A7XN	BLCA	diagnosis_subtype	Non-Papillary	270
TCGA_E7_A3Y1	BLCA	diagnosis_subtype	Papillary	132
TCGA_XF_A8HD	BLCA	diagnosis_subtype	Non-Papillary	270
TCGA_XF_AAMG	BLCA	diagnosis_subtype	Non-Papillary	270
TCGA_FD_A5BT	BLCA	diagnosis_subtype	Non-Papillary	270
TCGA_GC_A3OO	BLCA	diagnosis_subtype	Non-Papillary	270
TCGA_5N_A9KI	BLCA	diagnosis_subtype	Non-Papillary	270
TCGA_BT_A20U	BLCA	diagnosis_subtype	Non-Papillary	270
TCGA_CF_A7I0	BLCA	diagnosis_subtype	Papillary	132
TCGA_CF_A5U8	BLCA	diagnosis_subtype	Papillary	132
TCGA_DK_A3IM	BLCA	diagnosis_subtype	Papillary	132
TCGA_ZF_A9RN	BLCA	diagnosis_subtype	Non-Papillary	270
TCGA_GC_A3RD	BLCA	diagnosis_subtype	Non-Papillary	270
TCGA_E7_A97Q	BLCA	diagnosis_subtype	Non-Papillary	270
TCGA_ZF_A9RE	BLCA	diagnosis_subtype	Papillary	132
TCGA_XF_A9SM	BLCA	diagnosis_subtype	Non-Papillary	270
TCGA_DK_AA76	BLCA	diagnosis_subtype	Papillary	132
TCGA_PQ_A6FN	BLCA	diagnosis_subtype	Non-Papillary	270
TCGA_FD_A3B4	BLCA	diagnosis_subtype	Non-Papillary	270
TCGA_HQ_A2OE	BLCA	diagnosis_subtype	Papillary	132
TCGA_XF_A9T5	BLCA	diagnosis_subtype	Non-Papillary	270
TCGA_4Z_AA89	BLCA	diagnosis_subtype	Papillary	132
TCGA_ZF_AA4X	BLCA	diagnosis_subtype	Non-Papillary	270
TCGA_XF_AAME	BLCA	diagnosis_subtype	Non-Papillary	270
TCGA_XF_AAMH	BLCA	diagnosis_subtype	Non-Papillary	270
TCGA_FD_A3SS	BLCA	diagnosis_subtype	Non-Papillary	270
TCGA_XF_AAN5	BLCA	diagnosis_subtype	Non-Papillary	270
TCGA_FJ_A3ZE	BLCA	diagnosis_subtype	Non-Papillary	270
TCGA_XF_A9SK	BLCA	diagnosis_subtype	Non-Papillary	270
TCGA_CU_A0YN	BLCA	diagnosis_subtype	Non-Papillary	270
TCGA_GV_A3QG	BLCA	diagnosis_subtype	Papillary	132
TCGA_XF_A9SJ	BLCA	diagnosis_subtype	Non-Papillary	270
TCGA_XF_A9SW	BLCA	diagnosis_subtype	Non-Papillary	270
TCGA_XF_A8HG	BLCA	diagnosis_subtype	Non-Papillary	270
TCGA_XF_A9T3	BLCA	diagnosis_subtype	Non-Papillary	270
TCGA_GV_A3JZ	BLCA	diagnosis_subtype	Non-Papillary	270
TCGA_GV_A3QF	BLCA	diagnosis_subtype	Papillary	132
TCGA_DK_AA6S	BLCA	diagnosis_subtype	Non-Papillary	270
TCGA_FD_A43P	BLCA	diagnosis_subtype	Non-Papillary	270
TCGA_LC_A66R	BLCA	diagnosis_subtype	Papillary	132
TCGA_GV_A3QK	BLCA	diagnosis_subtype	Non-Papillary	270
TCGA_E5_A4TZ	BLCA	diagnosis_subtype	Papillary	132
TCGA_DK_A1AD	BLCA	diagnosis_subtype	Non-Papillary	270
TCGA_K4_A3WV	BLCA	diagnosis_subtype	Non-Papillary	270
TCGA_CU_A0YR	BLCA	diagnosis_subtype	Non-Papillary	270
TCGA_FD_A6TC	BLCA	diagnosis_subtype	Non-Papillary	270
TCGA_FD_A3N6	BLCA	diagnosis_subtype	Non-Papillary	270
TCGA_GU_AATP	BLCA	diagnosis_subtype	Papillary	132
TCGA_FD_A6TB	BLCA	diagnosis_subtype	Non-Papillary	270
TCGA_FD_A3B6	BLCA	diagnosis_subtype	Papillary	132
TCGA_FD_A5BR	BLCA	diagnosis_subtype	Non-Papillary	270
TCGA_DK_A3IN	BLCA	diagnosis_subtype	Papillary	132
TCGA_DK_AA74	BLCA	diagnosis_subtype	Non-Papillary	270
TCGA_CF_A47S	BLCA	diagnosis_subtype	Papillary	132
TCGA_GU_A767	BLCA	diagnosis_subtype	Papillary	132
TCGA_DK_A2HX	BLCA	diagnosis_subtype	Non-Papillary	270
TCGA_FD_A3SO	BLCA	diagnosis_subtype	Non-Papillary	270
TCGA_BT_A3PH	BLCA	diagnosis_subtype	Non-Papillary	270
TCGA_DK_AA6L	BLCA	diagnosis_subtype	Non-Papillary	270
TCGA_XF_AAN0	BLCA	diagnosis_subtype	Non-Papillary	270
TCGA_FD_A6TA	BLCA	diagnosis_subtype	Papillary	132
TCGA_ZF_A9RL	BLCA	diagnosis_subtype	Papillary	132
TCGA_DK_A2I1	BLCA	diagnosis_subtype	Papillary	132
TCGA_BT_A20T	BLCA	diagnosis_subtype	Non-Papillary	270
TCGA_4Z_AA7O	BLCA	diagnosis_subtype	Papillary	132
TCGA_ZF_AA4V	BLCA	diagnosis_subtype	Non-Papillary	270
TCGA_ZF_AA56	BLCA	diagnosis_subtype	Non-Papillary	270
TCGA_CU_A72E	BLCA	diagnosis_subtype	Non-Papillary	270
TCGA_DK_AA6W	BLCA	diagnosis_subtype	Non-Papillary	270
TCGA_DK_A3IS	BLCA	diagnosis_subtype	Papillary	132
TCGA_4Z_AA7S	BLCA	diagnosis_subtype	Non-Papillary	270
TCGA_ZF_AA5H	BLCA	diagnosis_subtype	Non-Papillary	270
TCGA_ZF_AA5N	BLCA	diagnosis_subtype	Non-Papillary	270
TCGA_FD_A43N	BLCA	diagnosis_subtype	Non-Papillary	270
TCGA_DK_A6B2	BLCA	diagnosis_subtype	Non-Papillary	270
TCGA_DK_A6AV	BLCA	diagnosis_subtype	Papillary	132
TCGA_DK_A2I6	BLCA	neoplasm_histologic_grade	High Grade	383
TCGA_FD_A43X	BLCA	neoplasm_histologic_grade	High Grade	383
TCGA_GC_A4ZW	BLCA	neoplasm_histologic_grade	High Grade	383
TCGA_FD_A5C0	BLCA	neoplasm_histologic_grade	High Grade	383
TCGA_GU_AATO	BLCA	neoplasm_histologic_grade	High Grade	383
TCGA_H4_A2HQ	BLCA	neoplasm_histologic_grade	High Grade	383
TCGA_XF_A9SL	BLCA	neoplasm_histologic_grade	High Grade	383
TCGA_4Z_AA7Y	BLCA	neoplasm_histologic_grade	High Grade	383
TCGA_2F_A9KP	BLCA	neoplasm_histologic_grade	High Grade	383
TCGA_K4_A54R	BLCA	neoplasm_histologic_grade	High Grade	383
TCGA_BT_A2LB	BLCA	neoplasm_histologic_grade	High Grade	383
TCGA_GU_A42Q	BLCA	neoplasm_histologic_grade	High Grade	383
TCGA_XF_AAMR	BLCA	neoplasm_histologic_grade	High Grade	383
TCGA_FD_A5BS	BLCA	neoplasm_histologic_grade	High Grade	383
TCGA_G2_A3VY	BLCA	neoplasm_histologic_grade	High Grade	383
TCGA_4Z_AA7W	BLCA	neoplasm_histologic_grade	High Grade	383
TCGA_DK_A1AC	BLCA	neoplasm_histologic_grade	High Grade	383
TCGA_FJ_A871	BLCA	neoplasm_histologic_grade	High Grade	383
TCGA_E7_A85H	BLCA	neoplasm_histologic_grade	High Grade	383
TCGA_CF_A3MG	BLCA	neoplasm_histologic_grade	Low Grade	21
TCGA_FD_A6TG	BLCA	neoplasm_histologic_grade	High Grade	383
TCGA_CF_A47Y	BLCA	neoplasm_histologic_grade	Low Grade	21
TCGA_DK_A3IL	BLCA	neoplasm_histologic_grade	High Grade	383
TCGA_CF_A47X	BLCA	neoplasm_histologic_grade	Low Grade	21
TCGA_G2_AA3F	BLCA	neoplasm_histologic_grade	High Grade	383
TCGA_UY_A8OC	BLCA	neoplasm_histologic_grade	High Grade	383
TCGA_XF_A9T8	BLCA	neoplasm_histologic_grade	High Grade	383
TCGA_DK_AA6M	BLCA	neoplasm_histologic_grade	High Grade	383
TCGA_DK_A1AF	BLCA	neoplasm_histologic_grade	High Grade	383
TCGA_FD_A6TI	BLCA	neoplasm_histologic_grade	High Grade	383
TCGA_BL_A5ZZ	BLCA	neoplasm_histologic_grade	High Grade	383
TCGA_C4_A0F6	BLCA	neoplasm_histologic_grade	High Grade	383
TCGA_FD_A62P	BLCA	neoplasm_histologic_grade	High Grade	383
TCGA_XF_A8HB	BLCA	neoplasm_histologic_grade	High Grade	383
TCGA_FD_A5BY	BLCA	neoplasm_histologic_grade	High Grade	383
TCGA_K4_A4AB	BLCA	neoplasm_histologic_grade	High Grade	383
TCGA_CF_A9FL	BLCA	neoplasm_histologic_grade	High Grade	383
TCGA_DK_A1AG	BLCA	neoplasm_histologic_grade	High Grade	383
TCGA_GC_A3BM	BLCA	neoplasm_histologic_grade	High Grade	383
TCGA_FD_A5BV	BLCA	neoplasm_histologic_grade	High Grade	383
TCGA_BT_A20Q	BLCA	neoplasm_histologic_grade	High Grade	383
TCGA_E7_A6ME	BLCA	neoplasm_histologic_grade	High Grade	383
TCGA_SY_A9G5	BLCA	neoplasm_histologic_grade	High Grade	383
TCGA_G2_A2EO	BLCA	neoplasm_histologic_grade	High Grade	383
TCGA_CF_A9FM	BLCA	neoplasm_histologic_grade	High Grade	383
TCGA_CF_A47W	BLCA	neoplasm_histologic_grade	Low Grade	21
TCGA_XF_A8HI	BLCA	neoplasm_histologic_grade	High Grade	383
TCGA_E7_A4XJ	BLCA	neoplasm_histologic_grade	High Grade	383
TCGA_DK_AA75	BLCA	neoplasm_histologic_grade	High Grade	383
TCGA_FD_A3SJ	BLCA	neoplasm_histologic_grade	High Grade	383
TCGA_4Z_AA81	BLCA	neoplasm_histologic_grade	High Grade	383
TCGA_G2_A2EC	BLCA	neoplasm_histologic_grade	High Grade	383
TCGA_FD_A6TE	BLCA	neoplasm_histologic_grade	High Grade	383
TCGA_E7_A8O8	BLCA	neoplasm_histologic_grade	High Grade	383
TCGA_ZF_A9RM	BLCA	neoplasm_histologic_grade	High Grade	383
TCGA_FD_A62O	BLCA	neoplasm_histologic_grade	High Grade	383
TCGA_2F_A9KO	BLCA	neoplasm_histologic_grade	High Grade	383
TCGA_DK_A3WX	BLCA	neoplasm_histologic_grade	High Grade	383
TCGA_DK_AA6T	BLCA	neoplasm_histologic_grade	High Grade	383
TCGA_DK_A1AE	BLCA	neoplasm_histologic_grade	High Grade	383
TCGA_R3_A69X	BLCA	neoplasm_histologic_grade	High Grade	383
TCGA_XF_A9T2	BLCA	neoplasm_histologic_grade	High Grade	383
TCGA_4Z_AA83	BLCA	neoplasm_histologic_grade	High Grade	383
TCGA_KQ_A41R	BLCA	neoplasm_histologic_grade	High Grade	383
TCGA_UY_A78N	BLCA	neoplasm_histologic_grade	High Grade	383
TCGA_DK_AA6R	BLCA	neoplasm_histologic_grade	High Grade	383
TCGA_GC_A6I1	BLCA	neoplasm_histologic_grade	High Grade	383
TCGA_XF_AAN4	BLCA	neoplasm_histologic_grade	High Grade	383
TCGA_BL_A13I	BLCA	neoplasm_histologic_grade	High Grade	383
TCGA_BL_A13I	BLCA	neoplasm_histologic_grade	High Grade	383
TCGA_S5_A6DX	BLCA	neoplasm_histologic_grade	High Grade	383
TCGA_DK_A6B6	BLCA	neoplasm_histologic_grade	High Grade	383
TCGA_YF_AA3M	BLCA	neoplasm_histologic_grade	High Grade	383
TCGA_ZF_A9R7	BLCA	neoplasm_histologic_grade	High Grade	383
TCGA_GC_A3RC	BLCA	neoplasm_histologic_grade	High Grade	383
TCGA_CF_A3MF	BLCA	neoplasm_histologic_grade	Low Grade	21
TCGA_4Z_AA7R	BLCA	neoplasm_histologic_grade	High Grade	383
TCGA_XF_A9SZ	BLCA	neoplasm_histologic_grade	High Grade	383
TCGA_DK_A3IT	BLCA	neoplasm_histologic_grade	High Grade	383
TCGA_XF_AAMZ	BLCA	neoplasm_histologic_grade	High Grade	383
TCGA_G2_AA3D	BLCA	neoplasm_histologic_grade	High Grade	383
TCGA_K4_A5RJ	BLCA	neoplasm_histologic_grade	High Grade	383
TCGA_G2_A2EL	BLCA	neoplasm_histologic_grade	High Grade	383
TCGA_CU_A3QU	BLCA	neoplasm_histologic_grade	High Grade	383
TCGA_FD_A5C1	BLCA	neoplasm_histologic_grade	High Grade	383
TCGA_GD_A76B	BLCA	neoplasm_histologic_grade	High Grade	383
TCGA_GU_AATQ	BLCA	neoplasm_histologic_grade	High Grade	383
TCGA_FD_A5BZ	BLCA	neoplasm_histologic_grade	High Grade	383
TCGA_MV_A51V	BLCA	neoplasm_histologic_grade	High Grade	383
TCGA_BT_A20P	BLCA	neoplasm_histologic_grade	High Grade	383
TCGA_2F_A9KQ	BLCA	neoplasm_histologic_grade	High Grade	383
TCGA_BT_A3PJ	BLCA	neoplasm_histologic_grade	High Grade	383
TCGA_BT_A20O	BLCA	neoplasm_histologic_grade	High Grade	383
TCGA_BT_A20R	BLCA	neoplasm_histologic_grade	High Grade	383
TCGA_GV_A3JW	BLCA	neoplasm_histologic_grade	High Grade	383
TCGA_BT_A20V	BLCA	neoplasm_histologic_grade	High Grade	383
TCGA_PQ_A6FI	BLCA	neoplasm_histologic_grade	High Grade	383
TCGA_UY_A9PB	BLCA	neoplasm_histologic_grade	High Grade	383
TCGA_CF_A9FF	BLCA	neoplasm_histologic_grade	High Grade	383
TCGA_XF_AAN3	BLCA	neoplasm_histologic_grade	High Grade	383
TCGA_ZF_A9RD	BLCA	neoplasm_histologic_grade	High Grade	383
TCGA_KQ_A41O	BLCA	neoplasm_histologic_grade	High Grade	383
TCGA_XF_AAMY	BLCA	neoplasm_histologic_grade	High Grade	383
TCGA_GU_A42P	BLCA	neoplasm_histologic_grade	High Grade	383
TCGA_FD_A6TF	BLCA	neoplasm_histologic_grade	High Grade	383
TCGA_GD_A3OS	BLCA	neoplasm_histologic_grade	High Grade	383
TCGA_XF_A8HH	BLCA	neoplasm_histologic_grade	High Grade	383
TCGA_G2_AA3B	BLCA	neoplasm_histologic_grade	High Grade	383
TCGA_ZF_A9R2	BLCA	neoplasm_histologic_grade	High Grade	383
TCGA_C4_A0F1	BLCA	neoplasm_histologic_grade	High Grade	383
TCGA_ZF_A9RF	BLCA	neoplasm_histologic_grade	High Grade	383
TCGA_KQ_A41Q	BLCA	neoplasm_histologic_grade	High Grade	383
TCGA_UY_A9PF	BLCA	neoplasm_histologic_grade	High Grade	383
TCGA_ZF_AA4W	BLCA	neoplasm_histologic_grade	High Grade	383
TCGA_H4_A2HO	BLCA	neoplasm_histologic_grade	High Grade	383
TCGA_H4_A2HO	BLCA	neoplasm_histologic_grade	High Grade	383
TCGA_FJ_A3Z9	BLCA	neoplasm_histologic_grade	High Grade	383
TCGA_XF_A9ST	BLCA	neoplasm_histologic_grade	High Grade	383
TCGA_UY_A8OB	BLCA	neoplasm_histologic_grade	High Grade	383
TCGA_E7_A4IJ	BLCA	neoplasm_histologic_grade	High Grade	383
TCGA_DK_A6B5	BLCA	neoplasm_histologic_grade	High Grade	383
TCGA_YC_A8S6	BLCA	neoplasm_histologic_grade	High Grade	383
TCGA_BL_A0C8	BLCA	neoplasm_histologic_grade	High Grade	383
TCGA_BL_A0C8	BLCA	neoplasm_histologic_grade	High Grade	383
TCGA_DK_AA71	BLCA	neoplasm_histologic_grade	High Grade	383
TCGA_FD_A43Y	BLCA	neoplasm_histologic_grade	High Grade	383
TCGA_FD_A62S	BLCA	neoplasm_histologic_grade	High Grade	383
TCGA_BT_A0YX	BLCA	neoplasm_histologic_grade	High Grade	383
TCGA_XF_AAMT	BLCA	neoplasm_histologic_grade	High Grade	383
TCGA_GV_A40E	BLCA	neoplasm_histologic_grade	High Grade	383
TCGA_GC_A3I6	BLCA	neoplasm_histologic_grade	High Grade	383
TCGA_ZF_A9RC	BLCA	neoplasm_histologic_grade	High Grade	383
TCGA_E7_A7DU	BLCA	neoplasm_histologic_grade	Low Grade	21
TCGA_YC_A89H	BLCA	neoplasm_histologic_grade	High Grade	383
TCGA_CF_A3MI	BLCA	neoplasm_histologic_grade	Low Grade	21
TCGA_XF_A9SI	BLCA	neoplasm_histologic_grade	High Grade	383
TCGA_E7_A3X6	BLCA	neoplasm_histologic_grade	Low Grade	21
TCGA_XF_A9SY	BLCA	neoplasm_histologic_grade	High Grade	383
TCGA_KQ_A41N	BLCA	neoplasm_histologic_grade	High Grade	383
TCGA_ZF_A9R3	BLCA	neoplasm_histologic_grade	High Grade	383
TCGA_DK_AA6P	BLCA	neoplasm_histologic_grade	High Grade	383
TCGA_4Z_AA86	BLCA	neoplasm_histologic_grade	High Grade	383
TCGA_4Z_AA7M	BLCA	neoplasm_histologic_grade	High Grade	383
TCGA_BT_A42F	BLCA	neoplasm_histologic_grade	High Grade	383
TCGA_E7_A678	BLCA	neoplasm_histologic_grade	Low Grade	21
TCGA_GU_A762	BLCA	neoplasm_histologic_grade	High Grade	383
TCGA_DK_AA6Q	BLCA	neoplasm_histologic_grade	High Grade	383
TCGA_DK_A6B1	BLCA	neoplasm_histologic_grade	High Grade	383
TCGA_XF_A9SX	BLCA	neoplasm_histologic_grade	High Grade	383
TCGA_E7_A6MD	BLCA	neoplasm_histologic_grade	High Grade	383
TCGA_4Z_AA7Q	BLCA	neoplasm_histologic_grade	High Grade	383
TCGA_DK_A3X2	BLCA	neoplasm_histologic_grade	High Grade	383
TCGA_UY_A8OD	BLCA	neoplasm_histologic_grade	High Grade	383
TCGA_ZF_A9R5	BLCA	neoplasm_histologic_grade	High Grade	383
TCGA_ZF_A9R0	BLCA	neoplasm_histologic_grade	High Grade	383
TCGA_LT_A8JT	BLCA	neoplasm_histologic_grade	High Grade	383
TCGA_BT_A20X	BLCA	neoplasm_histologic_grade	High Grade	383
TCGA_K4_A3WS	BLCA	neoplasm_histologic_grade	High Grade	383
TCGA_CF_A47V	BLCA	neoplasm_histologic_grade	High Grade	383
TCGA_FD_A5BU	BLCA	neoplasm_histologic_grade	High Grade	383
TCGA_XF_A8HF	BLCA	neoplasm_histologic_grade	High Grade	383
TCGA_BT_A20J	BLCA	neoplasm_histologic_grade	High Grade	383
TCGA_GD_A3OP	BLCA	neoplasm_histologic_grade	High Grade	383
TCGA_CU_A5W6	BLCA	neoplasm_histologic_grade	High Grade	383
TCGA_4Z_AA84	BLCA	neoplasm_histologic_grade	High Grade	383
TCGA_XF_AAMW	BLCA	neoplasm_histologic_grade	High Grade	383
TCGA_DK_A1A3	BLCA	neoplasm_histologic_grade	High Grade	383
TCGA_5N_A9KM	BLCA	neoplasm_histologic_grade	High Grade	383
TCGA_E7_A541	BLCA	neoplasm_histologic_grade	High Grade	383
TCGA_XF_A9T0	BLCA	neoplasm_histologic_grade	High Grade	383
TCGA_2F_A9KR	BLCA	neoplasm_histologic_grade	High Grade	383
TCGA_XF_AAMX	BLCA	neoplasm_histologic_grade	High Grade	383
TCGA_4Z_AA87	BLCA	neoplasm_histologic_grade	High Grade	383
TCGA_XF_A9SU	BLCA	neoplasm_histologic_grade	High Grade	383
TCGA_ZF_AA51	BLCA	neoplasm_histologic_grade	High Grade	383
TCGA_E7_A6MF	BLCA	neoplasm_histologic_grade	Low Grade	21
TCGA_GV_A40G	BLCA	neoplasm_histologic_grade	High Grade	383
TCGA_ZF_A9R1	BLCA	neoplasm_histologic_grade	High Grade	383
TCGA_CF_A1HR	BLCA	neoplasm_histologic_grade	High Grade	383
TCGA_C4_A0F0	BLCA	neoplasm_histologic_grade	High Grade	383
TCGA_4Z_AA82	BLCA	neoplasm_histologic_grade	High Grade	383
TCGA_ZF_AA5P	BLCA	neoplasm_histologic_grade	High Grade	383
TCGA_BT_A2LD	BLCA	neoplasm_histologic_grade	High Grade	383
TCGA_E7_A97P	BLCA	neoplasm_histologic_grade	High Grade	383
TCGA_DK_A3IK	BLCA	neoplasm_histologic_grade	High Grade	383
TCGA_DK_A1A7	BLCA	neoplasm_histologic_grade	High Grade	383
TCGA_XF_AAN1	BLCA	neoplasm_histologic_grade	High Grade	383
TCGA_DK_A2I4	BLCA	neoplasm_histologic_grade	High Grade	383
TCGA_GC_A3RB	BLCA	neoplasm_histologic_grade	High Grade	383
TCGA_UY_A9PH	BLCA	neoplasm_histologic_grade	High Grade	383
TCGA_BT_A20W	BLCA	neoplasm_histologic_grade	High Grade	383
TCGA_XF_A9T4	BLCA	neoplasm_histologic_grade	High Grade	383
TCGA_G2_A2EF	BLCA	neoplasm_histologic_grade	High Grade	383
TCGA_CF_A27C	BLCA	neoplasm_histologic_grade	High Grade	383
TCGA_LT_A5Z6	BLCA	neoplasm_histologic_grade	High Grade	383
TCGA_E7_A8O7	BLCA	neoplasm_histologic_grade	Low Grade	21
TCGA_GC_A3YS	BLCA	neoplasm_histologic_grade	High Grade	383
TCGA_DK_A2I2	BLCA	neoplasm_histologic_grade	High Grade	383
TCGA_E7_A7DV	BLCA	neoplasm_histologic_grade	High Grade	383
TCGA_G2_A2EK	BLCA	neoplasm_histologic_grade	High Grade	383
TCGA_FD_A3B8	BLCA	neoplasm_histologic_grade	High Grade	383
TCGA_XF_A9SH	BLCA	neoplasm_histologic_grade	High Grade	383
TCGA_GV_A3JX	BLCA	neoplasm_histologic_grade	High Grade	383
TCGA_E5_A4U1	BLCA	neoplasm_histologic_grade	High Grade	383
TCGA_GU_A764	BLCA	neoplasm_histologic_grade	High Grade	383
TCGA_CF_A9FH	BLCA	neoplasm_histologic_grade	Low Grade	21
TCGA_C4_A0EZ	BLCA	neoplasm_histologic_grade	High Grade	383
TCGA_BL_A3JM	BLCA	neoplasm_histologic_grade	High Grade	383
TCGA_FD_A43S	BLCA	neoplasm_histologic_grade	High Grade	383
TCGA_KQ_A41P	BLCA	neoplasm_histologic_grade	High Grade	383
TCGA_ZF_A9R4	BLCA	neoplasm_histologic_grade	High Grade	383
TCGA_K4_A6MB	BLCA	neoplasm_histologic_grade	High Grade	383
TCGA_FD_A3SP	BLCA	neoplasm_histologic_grade	High Grade	383
TCGA_K4_A5RH	BLCA	neoplasm_histologic_grade	High Grade	383
TCGA_DK_AA77	BLCA	neoplasm_histologic_grade	High Grade	383
TCGA_FJ_A3ZF	BLCA	neoplasm_histologic_grade	High Grade	383
TCGA_DK_A3IQ	BLCA	neoplasm_histologic_grade	High Grade	383
TCGA_ZF_AA58	BLCA	neoplasm_histologic_grade	High Grade	383
TCGA_G2_A3IB	BLCA	neoplasm_histologic_grade	High Grade	383
TCGA_CF_A8HY	BLCA	neoplasm_histologic_grade	High Grade	383
TCGA_DK_A3WW	BLCA	neoplasm_histologic_grade	High Grade	383
TCGA_GD_A2C5	BLCA	neoplasm_histologic_grade	High Grade	383
TCGA_XF_AAN2	BLCA	neoplasm_histologic_grade	High Grade	383
TCGA_G2_A2ES	BLCA	neoplasm_histologic_grade	High Grade	383
TCGA_2F_A9KW	BLCA	neoplasm_histologic_grade	High Grade	383
TCGA_GV_A3QH	BLCA	neoplasm_histologic_grade	High Grade	383
TCGA_K4_A3WU	BLCA	neoplasm_histologic_grade	High Grade	383
TCGA_GD_A6C6	BLCA	neoplasm_histologic_grade	High Grade	383
TCGA_BT_A3PK	BLCA	neoplasm_histologic_grade	High Grade	383
TCGA_FT_A3EE	BLCA	neoplasm_histologic_grade	High Grade	383
TCGA_DK_A3WY	BLCA	neoplasm_histologic_grade	High Grade	383
TCGA_UY_A9PE	BLCA	neoplasm_histologic_grade	High Grade	383
TCGA_SY_A9G0	BLCA	neoplasm_histologic_grade	High Grade	383
TCGA_XF_A8HC	BLCA	neoplasm_histologic_grade	High Grade	383
TCGA_ZF_AA4R	BLCA	neoplasm_histologic_grade	High Grade	383
TCGA_UY_A78M	BLCA	neoplasm_histologic_grade	High Grade	383
TCGA_S5_AA26	BLCA	neoplasm_histologic_grade	High Grade	383
TCGA_DK_A3X1	BLCA	neoplasm_histologic_grade	High Grade	383
TCGA_XF_AAN7	BLCA	neoplasm_histologic_grade	High Grade	383
TCGA_XF_AAML	BLCA	neoplasm_histologic_grade	High Grade	383
TCGA_C4_A0F7	BLCA	neoplasm_histologic_grade	High Grade	383
TCGA_XF_AAMQ	BLCA	neoplasm_histologic_grade	High Grade	383
TCGA_G2_AA3C	BLCA	neoplasm_histologic_grade	High Grade	383
TCGA_FD_A3NA	BLCA	neoplasm_histologic_grade	High Grade	383
TCGA_E7_A519	BLCA	neoplasm_histologic_grade	High Grade	383
TCGA_E7_A5KF	BLCA	neoplasm_histologic_grade	Low Grade	21
TCGA_HQ_A5NE	BLCA	neoplasm_histologic_grade	High Grade	383
TCGA_FD_A6TK	BLCA	neoplasm_histologic_grade	High Grade	383
TCGA_ZF_AA4T	BLCA	neoplasm_histologic_grade	High Grade	383
TCGA_CU_A3KJ	BLCA	neoplasm_histologic_grade	High Grade	383
TCGA_UY_A9PD	BLCA	neoplasm_histologic_grade	High Grade	383
TCGA_ZF_AA53	BLCA	neoplasm_histologic_grade	High Grade	383
TCGA_BT_A42E	BLCA	neoplasm_histologic_grade	High Grade	383
TCGA_ZF_AA54	BLCA	neoplasm_histologic_grade	High Grade	383
TCGA_ZF_AA4U	BLCA	neoplasm_histologic_grade	High Grade	383
TCGA_CF_A8HX	BLCA	neoplasm_histologic_grade	High Grade	383
TCGA_ZF_AA52	BLCA	neoplasm_histologic_grade	High Grade	383
TCGA_BL_A13J	BLCA	neoplasm_histologic_grade	High Grade	383
TCGA_BL_A13J	BLCA	neoplasm_histologic_grade	High Grade	383
TCGA_XF_A8HE	BLCA	neoplasm_histologic_grade	High Grade	383
TCGA_GV_A3QI	BLCA	neoplasm_histologic_grade	High Grade	383
TCGA_K4_A6FZ	BLCA	neoplasm_histologic_grade	High Grade	383
TCGA_XF_A9SV	BLCA	neoplasm_histologic_grade	High Grade	383
TCGA_YF_AA3L	BLCA	neoplasm_histologic_grade	High Grade	383
TCGA_CU_A3YL	BLCA	neoplasm_histologic_grade	High Grade	383
TCGA_CU_A0YO	BLCA	neoplasm_histologic_grade	High Grade	383
TCGA_FD_A5BX	BLCA	neoplasm_histologic_grade	High Grade	383
TCGA_GU_A763	BLCA	neoplasm_histologic_grade	High Grade	383
TCGA_UY_A78K	BLCA	neoplasm_histologic_grade	High Grade	383
TCGA_DK_A1AA	BLCA	neoplasm_histologic_grade	High Grade	383
TCGA_DK_A3IV	BLCA	neoplasm_histologic_grade	High Grade	383
TCGA_GC_A3WC	BLCA	neoplasm_histologic_grade	High Grade	383
TCGA_FT_A61P	BLCA	neoplasm_histologic_grade	High Grade	383
TCGA_E7_A7PW	BLCA	neoplasm_histologic_grade	High Grade	383
TCGA_DK_A1AB	BLCA	neoplasm_histologic_grade	High Grade	383
TCGA_GC_A6I3	BLCA	neoplasm_histologic_grade	High Grade	383
TCGA_FD_A3B7	BLCA	neoplasm_histologic_grade	High Grade	383
TCGA_FD_A3SL	BLCA	neoplasm_histologic_grade	High Grade	383
TCGA_DK_AA6X	BLCA	neoplasm_histologic_grade	High Grade	383
TCGA_K4_AAQO	BLCA	neoplasm_histologic_grade	High Grade	383
TCGA_GV_A3JV	BLCA	neoplasm_histologic_grade	High Grade	383
TCGA_GU_A766	BLCA	neoplasm_histologic_grade	High Grade	383
TCGA_GV_A6ZA	BLCA	neoplasm_histologic_grade	High Grade	383
TCGA_E7_A677	BLCA	neoplasm_histologic_grade	Low Grade	21
TCGA_E5_A2PC	BLCA	neoplasm_histologic_grade	High Grade	383
TCGA_FD_A3N5	BLCA	neoplasm_histologic_grade	High Grade	383
TCGA_E7_A5KE	BLCA	neoplasm_histologic_grade	High Grade	383
TCGA_UY_A78P	BLCA	neoplasm_histologic_grade	High Grade	383
TCGA_FD_A3SQ	BLCA	neoplasm_histologic_grade	High Grade	383
TCGA_FD_A3SM	BLCA	neoplasm_histologic_grade	High Grade	383
TCGA_CF_A5UA	BLCA	neoplasm_histologic_grade	Low Grade	21
TCGA_XF_A9SP	BLCA	neoplasm_histologic_grade	High Grade	383
TCGA_DK_A1A6	BLCA	neoplasm_histologic_grade	High Grade	383
TCGA_FD_A62N	BLCA	neoplasm_histologic_grade	High Grade	383
TCGA_CF_A47T	BLCA	neoplasm_histologic_grade	Low Grade	21
TCGA_DK_A6B0	BLCA	neoplasm_histologic_grade	High Grade	383
TCGA_FD_A6TD	BLCA	neoplasm_histologic_grade	High Grade	383
TCGA_BT_A0S7	BLCA	neoplasm_histologic_grade	High Grade	383
TCGA_K4_A4AC	BLCA	neoplasm_histologic_grade	High Grade	383
TCGA_XF_A9T6	BLCA	neoplasm_histologic_grade	High Grade	383
TCGA_FD_A3SR	BLCA	neoplasm_histologic_grade	High Grade	383
TCGA_2F_A9KT	BLCA	neoplasm_histologic_grade	High Grade	383
TCGA_UY_A78O	BLCA	neoplasm_histologic_grade	High Grade	383
TCGA_XF_AAMJ	BLCA	neoplasm_histologic_grade	High Grade	383
TCGA_FD_A43U	BLCA	neoplasm_histologic_grade	High Grade	383
TCGA_FJ_A3Z7	BLCA	neoplasm_histologic_grade	High Grade	383
TCGA_FD_A3SN	BLCA	neoplasm_histologic_grade	High Grade	383
TCGA_4Z_AA80	BLCA	neoplasm_histologic_grade	High Grade	383
TCGA_G2_A3IE	BLCA	neoplasm_histologic_grade	High Grade	383
TCGA_BT_A20N	BLCA	neoplasm_histologic_grade	High Grade	383
TCGA_DK_A1A5	BLCA	neoplasm_histologic_grade	High Grade	383
TCGA_HQ_A5ND	BLCA	neoplasm_histologic_grade	High Grade	383
TCGA_FD_A6TH	BLCA	neoplasm_histologic_grade	High Grade	383
TCGA_FD_A3B5	BLCA	neoplasm_histologic_grade	High Grade	383
TCGA_UY_A9PA	BLCA	neoplasm_histologic_grade	High Grade	383
TCGA_G2_A2EJ	BLCA	neoplasm_histologic_grade	High Grade	383
TCGA_KQ_A41S	BLCA	neoplasm_histologic_grade	High Grade	383
TCGA_BT_A42C	BLCA	neoplasm_histologic_grade	High Grade	383
TCGA_BT_A2LA	BLCA	neoplasm_histologic_grade	High Grade	383
TCGA_ZF_A9R9	BLCA	neoplasm_histologic_grade	High Grade	383
TCGA_DK_A6AW	BLCA	neoplasm_histologic_grade	High Grade	383
TCGA_UY_A78L	BLCA	neoplasm_histologic_grade	High Grade	383
TCGA_4Z_AA7N	BLCA	neoplasm_histologic_grade	High Grade	383
TCGA_YC_A9TC	BLCA	neoplasm_histologic_grade	High Grade	383
TCGA_K4_A5RI	BLCA	neoplasm_histologic_grade	High Grade	383
TCGA_GU_A42R	BLCA	neoplasm_histologic_grade	High Grade	383
TCGA_CF_A3MH	BLCA	neoplasm_histologic_grade	Low Grade	21
TCGA_GD_A3OQ	BLCA	neoplasm_histologic_grade	High Grade	383
TCGA_E7_A7XN	BLCA	neoplasm_histologic_grade	High Grade	383
TCGA_E7_A3Y1	BLCA	neoplasm_histologic_grade	Low Grade	21
TCGA_XF_A8HD	BLCA	neoplasm_histologic_grade	High Grade	383
TCGA_XF_AAMG	BLCA	neoplasm_histologic_grade	High Grade	383
TCGA_FD_A5BT	BLCA	neoplasm_histologic_grade	High Grade	383
TCGA_GC_A3OO	BLCA	neoplasm_histologic_grade	High Grade	383
TCGA_5N_A9KI	BLCA	neoplasm_histologic_grade	High Grade	383
TCGA_BT_A20U	BLCA	neoplasm_histologic_grade	High Grade	383
TCGA_CF_A7I0	BLCA	neoplasm_histologic_grade	Low Grade	21
TCGA_CF_A5U8	BLCA	neoplasm_histologic_grade	Low Grade	21
TCGA_DK_A3IM	BLCA	neoplasm_histologic_grade	High Grade	383
TCGA_ZF_A9RN	BLCA	neoplasm_histologic_grade	High Grade	383
TCGA_GC_A3RD	BLCA	neoplasm_histologic_grade	High Grade	383
TCGA_E7_A97Q	BLCA	neoplasm_histologic_grade	High Grade	383
TCGA_ZF_A9RE	BLCA	neoplasm_histologic_grade	High Grade	383
TCGA_XF_A9SM	BLCA	neoplasm_histologic_grade	High Grade	383
TCGA_DK_AA76	BLCA	neoplasm_histologic_grade	High Grade	383
TCGA_PQ_A6FN	BLCA	neoplasm_histologic_grade	High Grade	383
TCGA_FD_A3B4	BLCA	neoplasm_histologic_grade	High Grade	383
TCGA_XF_A9T5	BLCA	neoplasm_histologic_grade	High Grade	383
TCGA_4Z_AA89	BLCA	neoplasm_histologic_grade	High Grade	383
TCGA_ZF_AA4X	BLCA	neoplasm_histologic_grade	High Grade	383
TCGA_XF_AAME	BLCA	neoplasm_histologic_grade	High Grade	383
TCGA_XF_AAMH	BLCA	neoplasm_histologic_grade	High Grade	383
TCGA_FD_A3SS	BLCA	neoplasm_histologic_grade	High Grade	383
TCGA_XF_AAN5	BLCA	neoplasm_histologic_grade	High Grade	383
TCGA_FJ_A3ZE	BLCA	neoplasm_histologic_grade	High Grade	383
TCGA_XF_A9SK	BLCA	neoplasm_histologic_grade	High Grade	383
TCGA_CU_A0YN	BLCA	neoplasm_histologic_grade	High Grade	383
TCGA_GV_A3QG	BLCA	neoplasm_histologic_grade	High Grade	383
TCGA_XF_A9SJ	BLCA	neoplasm_histologic_grade	High Grade	383
TCGA_XF_A9SW	BLCA	neoplasm_histologic_grade	High Grade	383
TCGA_XF_A8HG	BLCA	neoplasm_histologic_grade	High Grade	383
TCGA_XF_A9T3	BLCA	neoplasm_histologic_grade	High Grade	383
TCGA_GV_A3JZ	BLCA	neoplasm_histologic_grade	High Grade	383
TCGA_GV_A3QF	BLCA	neoplasm_histologic_grade	High Grade	383
TCGA_DK_AA6S	BLCA	neoplasm_histologic_grade	High Grade	383
TCGA_FD_A43P	BLCA	neoplasm_histologic_grade	High Grade	383
TCGA_LC_A66R	BLCA	neoplasm_histologic_grade	High Grade	383
TCGA_GV_A3QK	BLCA	neoplasm_histologic_grade	High Grade	383
TCGA_E5_A4TZ	BLCA	neoplasm_histologic_grade	High Grade	383
TCGA_DK_A1AD	BLCA	neoplasm_histologic_grade	High Grade	383
TCGA_K4_A3WV	BLCA	neoplasm_histologic_grade	High Grade	383
TCGA_CU_A0YR	BLCA	neoplasm_histologic_grade	High Grade	383
TCGA_FD_A6TC	BLCA	neoplasm_histologic_grade	High Grade	383
TCGA_FD_A3N6	BLCA	neoplasm_histologic_grade	High Grade	383
TCGA_GU_AATP	BLCA	neoplasm_histologic_grade	High Grade	383
TCGA_FD_A6TB	BLCA	neoplasm_histologic_grade	High Grade	383
TCGA_FD_A3B6	BLCA	neoplasm_histologic_grade	High Grade	383
TCGA_FD_A5BR	BLCA	neoplasm_histologic_grade	High Grade	383
TCGA_DK_A3IN	BLCA	neoplasm_histologic_grade	High Grade	383
TCGA_DK_AA74	BLCA	neoplasm_histologic_grade	High Grade	383
TCGA_CF_A47S	BLCA	neoplasm_histologic_grade	Low Grade	21
TCGA_GU_A767	BLCA	neoplasm_histologic_grade	High Grade	383
TCGA_DK_A2HX	BLCA	neoplasm_histologic_grade	High Grade	383
TCGA_FD_A3SO	BLCA	neoplasm_histologic_grade	High Grade	383
TCGA_BT_A3PH	BLCA	neoplasm_histologic_grade	High Grade	383
TCGA_DK_AA6L	BLCA	neoplasm_histologic_grade	High Grade	383
TCGA_XF_AAN0	BLCA	neoplasm_histologic_grade	High Grade	383
TCGA_FD_A6TA	BLCA	neoplasm_histologic_grade	High Grade	383
TCGA_ZF_A9RL	BLCA	neoplasm_histologic_grade	High Grade	383
TCGA_DK_A2I1	BLCA	neoplasm_histologic_grade	High Grade	383
TCGA_BT_A20T	BLCA	neoplasm_histologic_grade	High Grade	383
TCGA_4Z_AA7O	BLCA	neoplasm_histologic_grade	High Grade	383
TCGA_ZF_AA4V	BLCA	neoplasm_histologic_grade	High Grade	383
TCGA_ZF_AA56	BLCA	neoplasm_histologic_grade	High Grade	383
TCGA_CU_A72E	BLCA	neoplasm_histologic_grade	High Grade	383
TCGA_DK_AA6W	BLCA	neoplasm_histologic_grade	High Grade	383
TCGA_DK_A3IS	BLCA	neoplasm_histologic_grade	High Grade	383
TCGA_4Z_AA7S	BLCA	neoplasm_histologic_grade	High Grade	383
TCGA_ZF_AA5H	BLCA	neoplasm_histologic_grade	High Grade	383
TCGA_ZF_AA5N	BLCA	neoplasm_histologic_grade	High Grade	383
TCGA_FD_A43N	BLCA	neoplasm_histologic_grade	High Grade	383
TCGA_DK_A6B2	BLCA	neoplasm_histologic_grade	High Grade	383
TCGA_DK_A3IU	BLCA	neoplasm_histologic_grade	High Grade	383
TCGA_DK_A6AV	BLCA	neoplasm_histologic_grade	High Grade	383
TCGA_DK_A2I6	BLCA	pathologic_N	N+	130
TCGA_FD_A43X	BLCA	pathologic_N	N-	235
TCGA_GC_A4ZW	BLCA	pathologic_N	N-	235
TCGA_FD_A5C0	BLCA	pathologic_N	N+	130
TCGA_GU_AATO	BLCA	pathologic_N	N+	130
TCGA_XF_A9SL	BLCA	pathologic_N	N+	130
TCGA_4Z_AA7Y	BLCA	pathologic_N	N-	235
TCGA_2F_A9KP	BLCA	pathologic_N	N+	130
TCGA_K4_A54R	BLCA	pathologic_N	N-	235
TCGA_BT_A2LB	BLCA	pathologic_N	N-	235
TCGA_GU_A42Q	BLCA	pathologic_N	N-	235
TCGA_XF_AAMR	BLCA	pathologic_N	N-	235
TCGA_FD_A5BS	BLCA	pathologic_N	N-	235
TCGA_4Z_AA7W	BLCA	pathologic_N	N-	235
TCGA_DK_A1AC	BLCA	pathologic_N	N-	235
TCGA_E7_A85H	BLCA	pathologic_N	N-	235
TCGA_CF_A3MG	BLCA	pathologic_N	N-	235
TCGA_FD_A6TG	BLCA	pathologic_N	N+	130
TCGA_CF_A47Y	BLCA	pathologic_N	N-	235
TCGA_DK_A3IL	BLCA	pathologic_N	N+	130
TCGA_CF_A47X	BLCA	pathologic_N	N-	235
TCGA_G2_AA3F	BLCA	pathologic_N	N+	130
TCGA_UY_A8OC	BLCA	pathologic_N	N+	130
TCGA_XF_A9T8	BLCA	pathologic_N	N-	235
TCGA_DK_AA6M	BLCA	pathologic_N	N-	235
TCGA_DK_A1AF	BLCA	pathologic_N	N+	130
TCGA_FD_A6TI	BLCA	pathologic_N	N+	130
TCGA_BL_A5ZZ	BLCA	pathologic_N	N-	235
TCGA_C4_A0F6	BLCA	pathologic_N	N-	235
TCGA_FD_A62P	BLCA	pathologic_N	N-	235
TCGA_XF_A8HB	BLCA	pathologic_N	N-	235
TCGA_FD_A5BY	BLCA	pathologic_N	N-	235
TCGA_K4_A4AB	BLCA	pathologic_N	N-	235
TCGA_CF_A9FL	BLCA	pathologic_N	N-	235
TCGA_DK_A1AG	BLCA	pathologic_N	N-	235
TCGA_GC_A3BM	BLCA	pathologic_N	N-	235
TCGA_FD_A5BV	BLCA	pathologic_N	N-	235
TCGA_BT_A20Q	BLCA	pathologic_N	N+	130
TCGA_SY_A9G5	BLCA	pathologic_N	N-	235
TCGA_G2_A2EO	BLCA	pathologic_N	N-	235
TCGA_CF_A9FM	BLCA	pathologic_N	N-	235
TCGA_CF_A47W	BLCA	pathologic_N	N-	235
TCGA_XF_A8HI	BLCA	pathologic_N	N+	130
TCGA_E7_A4XJ	BLCA	pathologic_N	N-	235
TCGA_DK_AA75	BLCA	pathologic_N	N-	235
TCGA_FD_A3SJ	BLCA	pathologic_N	N+	130
TCGA_4Z_AA81	BLCA	pathologic_N	N-	235
TCGA_G2_A2EC	BLCA	pathologic_N	N-	235
TCGA_FD_A6TE	BLCA	pathologic_N	N+	130
TCGA_E7_A8O8	BLCA	pathologic_N	N-	235
TCGA_ZF_A9RM	BLCA	pathologic_N	N-	235
TCGA_FD_A62O	BLCA	pathologic_N	N+	130
TCGA_2F_A9KO	BLCA	pathologic_N	N+	130
TCGA_DK_A3WX	BLCA	pathologic_N	N-	235
TCGA_DK_AA6T	BLCA	pathologic_N	N-	235
TCGA_DK_A1AE	BLCA	pathologic_N	N-	235
TCGA_R3_A69X	BLCA	pathologic_N	N-	235
TCGA_XF_A9T2	BLCA	pathologic_N	N-	235
TCGA_4Z_AA83	BLCA	pathologic_N	N-	235
TCGA_KQ_A41R	BLCA	pathologic_N	N-	235
TCGA_UY_A78N	BLCA	pathologic_N	N+	130
TCGA_DK_AA6R	BLCA	pathologic_N	N+	130
TCGA_GC_A6I1	BLCA	pathologic_N	N-	235
TCGA_XF_AAN4	BLCA	pathologic_N	N-	235
TCGA_BL_A13I	BLCA	pathologic_N	N-	235
TCGA_BL_A13I	BLCA	pathologic_N	N-	235
TCGA_S5_A6DX	BLCA	pathologic_N	N+	130
TCGA_GC_A3RC	BLCA	pathologic_N	N-	235
TCGA_CF_A3MF	BLCA	pathologic_N	N-	235
TCGA_4Z_AA7R	BLCA	pathologic_N	N-	235
TCGA_XF_A9SZ	BLCA	pathologic_N	N+	130
TCGA_DK_A3IT	BLCA	pathologic_N	N-	235
TCGA_XF_AAMZ	BLCA	pathologic_N	N+	130
TCGA_G2_AA3D	BLCA	pathologic_N	N+	130
TCGA_K4_A5RJ	BLCA	pathologic_N	N-	235
TCGA_G2_A2EL	BLCA	pathologic_N	N-	235
TCGA_CU_A3QU	BLCA	pathologic_N	N+	130
TCGA_FD_A5C1	BLCA	pathologic_N	N-	235
TCGA_GD_A76B	BLCA	pathologic_N	N-	235
TCGA_GU_AATQ	BLCA	pathologic_N	N-	235
TCGA_FD_A5BZ	BLCA	pathologic_N	N+	130
TCGA_MV_A51V	BLCA	pathologic_N	N-	235
TCGA_BT_A20P	BLCA	pathologic_N	N-	235
TCGA_2F_A9KQ	BLCA	pathologic_N	N-	235
TCGA_BT_A3PJ	BLCA	pathologic_N	N-	235
TCGA_BT_A20O	BLCA	pathologic_N	N-	235
TCGA_BT_A20R	BLCA	pathologic_N	N+	130
TCGA_BT_A20V	BLCA	pathologic_N	N+	130
TCGA_PQ_A6FI	BLCA	pathologic_N	N-	235
TCGA_UY_A9PB	BLCA	pathologic_N	N-	235
TCGA_CF_A9FF	BLCA	pathologic_N	N-	235
TCGA_XF_AAN3	BLCA	pathologic_N	N+	130
TCGA_ZF_A9RD	BLCA	pathologic_N	N+	130
TCGA_KQ_A41O	BLCA	pathologic_N	N+	130
TCGA_XF_AAMY	BLCA	pathologic_N	N-	235
TCGA_GU_A42P	BLCA	pathologic_N	N+	130
TCGA_FD_A6TF	BLCA	pathologic_N	N+	130
TCGA_XF_A8HH	BLCA	pathologic_N	N+	130
TCGA_G2_AA3B	BLCA	pathologic_N	N-	235
TCGA_ZF_A9R2	BLCA	pathologic_N	N-	235
TCGA_C4_A0F1	BLCA	pathologic_N	N-	235
TCGA_KQ_A41Q	BLCA	pathologic_N	N-	235
TCGA_UY_A9PF	BLCA	pathologic_N	N+	130
TCGA_ZF_AA4W	BLCA	pathologic_N	N-	235
TCGA_H4_A2HO	BLCA	pathologic_N	N-	235
TCGA_H4_A2HO	BLCA	pathologic_N	N-	235
TCGA_FJ_A3Z9	BLCA	pathologic_N	N-	235
TCGA_XF_A9ST	BLCA	pathologic_N	N-	235
TCGA_UY_A8OB	BLCA	pathologic_N	N+	130
TCGA_DK_A6B5	BLCA	pathologic_N	N+	130
TCGA_YC_A8S6	BLCA	pathologic_N	N-	235
TCGA_DK_AA71	BLCA	pathologic_N	N-	235
TCGA_FD_A43Y	BLCA	pathologic_N	N-	235
TCGA_FD_A62S	BLCA	pathologic_N	N-	235
TCGA_BT_A0YX	BLCA	pathologic_N	N-	235
TCGA_XF_AAMT	BLCA	pathologic_N	N+	130
TCGA_GC_A3I6	BLCA	pathologic_N	N-	235
TCGA_ZF_A9RC	BLCA	pathologic_N	N-	235
TCGA_E7_A7DU	BLCA	pathologic_N	N-	235
TCGA_CF_A3MI	BLCA	pathologic_N	N-	235
TCGA_XF_A9SI	BLCA	pathologic_N	N-	235
TCGA_XF_A9SY	BLCA	pathologic_N	N+	130
TCGA_KQ_A41N	BLCA	pathologic_N	N-	235
TCGA_DK_AA6P	BLCA	pathologic_N	N-	235
TCGA_4Z_AA86	BLCA	pathologic_N	N+	130
TCGA_4Z_AA7M	BLCA	pathologic_N	N-	235
TCGA_BT_A42F	BLCA	pathologic_N	N+	130
TCGA_E7_A678	BLCA	pathologic_N	N-	235
TCGA_GU_A762	BLCA	pathologic_N	N+	130
TCGA_DK_AA6Q	BLCA	pathologic_N	N+	130
TCGA_DK_A6B1	BLCA	pathologic_N	N-	235
TCGA_XF_A9SX	BLCA	pathologic_N	N+	130
TCGA_E7_A6MD	BLCA	pathologic_N	N+	130
TCGA_DK_A3X2	BLCA	pathologic_N	N+	130
TCGA_UY_A8OD	BLCA	pathologic_N	N-	235
TCGA_ZF_A9R5	BLCA	pathologic_N	N-	235
TCGA_LT_A8JT	BLCA	pathologic_N	N-	235
TCGA_BT_A20X	BLCA	pathologic_N	N+	130
TCGA_K4_A3WS	BLCA	pathologic_N	N-	235
TCGA_CF_A47V	BLCA	pathologic_N	N-	235
TCGA_FD_A5BU	BLCA	pathologic_N	N-	235
TCGA_XF_A8HF	BLCA	pathologic_N	N-	235
TCGA_BT_A20J	BLCA	pathologic_N	N-	235
TCGA_GD_A3OP	BLCA	pathologic_N	N+	130
TCGA_CU_A5W6	BLCA	pathologic_N	N-	235
TCGA_4Z_AA84	BLCA	pathologic_N	N+	130
TCGA_XF_AAMW	BLCA	pathologic_N	N-	235
TCGA_DK_A1A3	BLCA	pathologic_N	N+	130
TCGA_5N_A9KM	BLCA	pathologic_N	N-	235
TCGA_E7_A541	BLCA	pathologic_N	N-	235
TCGA_XF_A9T0	BLCA	pathologic_N	N-	235
TCGA_2F_A9KR	BLCA	pathologic_N	N-	235
TCGA_XF_AAMX	BLCA	pathologic_N	N-	235
TCGA_4Z_AA87	BLCA	pathologic_N	N-	235
TCGA_XF_A9SU	BLCA	pathologic_N	N+	130
TCGA_GV_A40G	BLCA	pathologic_N	N-	235
TCGA_ZF_A9R1	BLCA	pathologic_N	N+	130
TCGA_CF_A1HR	BLCA	pathologic_N	N-	235
TCGA_C4_A0F0	BLCA	pathologic_N	N-	235
TCGA_K4_A83P	BLCA	pathologic_N	N+	130
TCGA_4Z_AA82	BLCA	pathologic_N	N+	130
TCGA_ZF_AA5P	BLCA	pathologic_N	N+	130
TCGA_BT_A2LD	BLCA	pathologic_N	N+	130
TCGA_DK_A3IK	BLCA	pathologic_N	N+	130
TCGA_DK_A1A7	BLCA	pathologic_N	N+	130
TCGA_XF_AAN1	BLCA	pathologic_N	N-	235
TCGA_DK_A2I4	BLCA	pathologic_N	N-	235
TCGA_GC_A3RB	BLCA	pathologic_N	N-	235
TCGA_UY_A9PH	BLCA	pathologic_N	N-	235
TCGA_BT_A20W	BLCA	pathologic_N	N-	235
TCGA_XF_A9T4	BLCA	pathologic_N	N+	130
TCGA_G2_A2EF	BLCA	pathologic_N	N-	235
TCGA_CF_A27C	BLCA	pathologic_N	N-	235
TCGA_E7_A8O7	BLCA	pathologic_N	N-	235
TCGA_GC_A3YS	BLCA	pathologic_N	N+	130
TCGA_DK_A2I2	BLCA	pathologic_N	N+	130
TCGA_E7_A7DV	BLCA	pathologic_N	N+	130
TCGA_G2_A2EK	BLCA	pathologic_N	N-	235
TCGA_FD_A3B8	BLCA	pathologic_N	N-	235
TCGA_XF_A9SH	BLCA	pathologic_N	N-	235
TCGA_GV_A3JX	BLCA	pathologic_N	N-	235
TCGA_E5_A4U1	BLCA	pathologic_N	N-	235
TCGA_GU_A764	BLCA	pathologic_N	N-	235
TCGA_CF_A9FH	BLCA	pathologic_N	N-	235
TCGA_C4_A0EZ	BLCA	pathologic_N	N+	130
TCGA_BL_A3JM	BLCA	pathologic_N	N-	235
TCGA_FD_A43S	BLCA	pathologic_N	N-	235
TCGA_KQ_A41P	BLCA	pathologic_N	N+	130
TCGA_K4_A6MB	BLCA	pathologic_N	N+	130
TCGA_FD_A3SP	BLCA	pathologic_N	N-	235
TCGA_K4_A5RH	BLCA	pathologic_N	N-	235
TCGA_DK_AA77	BLCA	pathologic_N	N-	235
TCGA_FJ_A3ZF	BLCA	pathologic_N	N-	235
TCGA_DK_A3IQ	BLCA	pathologic_N	N-	235
TCGA_ZF_AA58	BLCA	pathologic_N	N+	130
TCGA_CF_A8HY	BLCA	pathologic_N	N-	235
TCGA_DK_A3WW	BLCA	pathologic_N	N-	235
TCGA_GD_A2C5	BLCA	pathologic_N	N+	130
TCGA_XF_AAN2	BLCA	pathologic_N	N-	235
TCGA_G2_A2ES	BLCA	pathologic_N	N-	235
[truncated: 66,830 more rows]
