# Supplementary material for: Identification of alternative splicing associated with clinical features: from pan-cancers to genitourinary tumors
Source: Front Oncol. 2023 Sep 25;13:1249932. doi: 10.3389/fonc.2023.1249932 (PMC10557043; doi:10.3389/fonc.2023.1249932)
Supplement: Supplementary file 5 [file Table_2.xlsx]

## Sheet: tableS2_all_ases_morethan50_of_
Supplemental table S2. Alternative splicing events related to 30 clinical features in 24 cancers
Splice_Event	Gene_Symbol	Gene_ID	Chr_Strand	Splice_Type	Upstream_Exon	Downstream_Exon	Alt_Exons	Cancer_Type	CI_Type	CI_Value	PSI_Difference	P_Value	FDR	pct
ABCC5_AD_67824	ABCC5	ENSG00000114770	chr3 | -	AD	7.1	7.6	7.2:7.3:7.4	ACC	pathologic_T	"T3/T4" vs "T1/T2"	-0.3437	0.00136	0.029	0.8987
ABCC5_RI_67821	ABCC5	ENSG00000114770	chr3 | -	RI	7.1	7.6	7.2:7.3:7.4:7.5	ACC	pathologic_T	"T3/T4" vs "T1/T2"	-0.1747	0.00792	0.048	0.962
ARHGAP12_ES_11153	ARHGAP12	ENSG00000165322	chr10 | -	ES	7	10	08:09:00	ACC	pathologic_T	"T3/T4" vs "T1/T2"	0.1292	0.00356	0.036	0.7975
BANF1_AD_16981	BANF1	ENSG00000175334	chr11 | +	AD	2.1	3	2.2	ACC	pathologic_T	"T3/T4" vs "T1/T2"	-0.2468	0.00312	0.036	0.8481
C12orf76_AT_24403	C12orf76	ENSG00000174456	chr12 | -	AT	NA	NA	10.2	ACC	pathologic_T	"T3/T4" vs "T1/T2"	0.1108	0.0027	0.035	1
C14orf93_RI_26685	C14orf93	ENSG00000100802	chr14 | -	RI	3.2	3.4	3.3	ACC	pathologic_T	"T3/T4" vs "T1/T2"	-0.1055	0.000187	0.01	0.962
C18orf56_AT_44455	C18orf56	ENSG00000176912	chr18 | -	AT	NA	NA	3	ACC	pathologic_T	"T3/T4" vs "T1/T2"	-0.1531	0.00587	0.044	0.9241
C18orf56_AT_44456	C18orf56	ENSG00000176912	chr18 | -	AT	NA	NA	2	ACC	pathologic_T	"T3/T4" vs "T1/T2"	0.1531	0.00587	0.044	0.9241
C20orf96_AP_58435	C20orf96	ENSG00000196476	chr20 | -	AP	NA	NA	2.1	ACC	pathologic_T	"T3/T4" vs "T1/T2"	0.1004	0.000871	0.027	1
C20orf96_AP_58436	C20orf96	ENSG00000196476	chr20 | -	AP	NA	NA	1	ACC	pathologic_T	"T3/T4" vs "T1/T2"	-0.1004	0.000871	0.027	1
C6orf141_AT_76449	C6orf141	ENSG00000197261	chr6 | +	AT	NA	NA	5	ACC	pathologic_T	"T3/T4" vs "T1/T2"	0.2114	0.00311	0.036	0.9873
CCDC90B_AD_18086	CCDC90B	ENSG00000137500	chr11 | -	AD	1.1	2	1.2:1.3:1.4:1.5	ACC	pathologic_T	"T3/T4" vs "T1/T2"	0.1374	0.00237	0.033	0.9367
CMC4_AP_90668	CMC4	ENSG00000182712	chrX | -	AP	NA	NA	2	ACC	pathologic_T	"T3/T4" vs "T1/T2"	0.1058	0.00845	0.048	1
CMC4_AP_90669	CMC4	ENSG00000182712	chrX | -	AP	NA	NA	1	ACC	pathologic_T	"T3/T4" vs "T1/T2"	-0.1058	0.00845	0.048	1
CNNM2_AT_12983	CNNM2	ENSG00000148842	chr10 | +	AT	NA	NA	9	ACC	pathologic_T	"T3/T4" vs "T1/T2"	-0.1103	0.0041	0.038	1
CNNM2_AT_12984	CNNM2	ENSG00000148842	chr10 | +	AT	NA	NA	2	ACC	pathologic_T	"T3/T4" vs "T1/T2"	0.1103	0.0041	0.038	1
CREM_AP_11230	CREM	ENSG00000095794	chr10 | +	AP	NA	NA	12	ACC	pathologic_T	"T3/T4" vs "T1/T2"	0.1331	0.00391	0.038	0.9873
CREM_ES_11264	CREM	ENSG00000095794	chr10 | +	ES	4	15	9.2:10.1	ACC	pathologic_T	"T3/T4" vs "T1/T2"	0.134	0.0011	0.028	0.9494
CREM_ES_11293	CREM	ENSG00000095794	chr10 | +	ES	1	15	4	ACC	pathologic_T	"T3/T4" vs "T1/T2"	-0.1476	0.00114	0.028	0.8861
CTBP2_AP_13412	CTBP2	ENSG00000175029	chr10 | -	AP	NA	NA	3	ACC	pathologic_T	"T3/T4" vs "T1/T2"	-0.103	0.004	0.038	0.8734
CXCL12_AT_11342	CXCL12	ENSG00000107562	chr10 | -	AT	NA	NA	5.2	ACC	pathologic_T	"T3/T4" vs "T1/T2"	0.1203	0.00744	0.047	1
D2HGDH_ES_58418	D2HGDH	ENSG00000180902	chr2 | +	ES	6	11.2	8:9:10:11.1	ACC	pathologic_T	"T3/T4" vs "T1/T2"	0.251	0.0062	0.044	0.9873
D2HGDH_ES_58419	D2HGDH	ENSG00000180902	chr2 | +	ES	6	11.2	7.1:7.2:7.3:8:9	ACC	pathologic_T	"T3/T4" vs "T1/T2"	0.2275	0.00642	0.044	0.9873
DEDD_AP_8558	DEDD	ENSG00000158796	chr1 | -	AP	NA	NA	2	ACC	pathologic_T	"T3/T4" vs "T1/T2"	-0.1277	0.00416	0.038	0.8734
DEDD_AP_8560	DEDD	ENSG00000158796	chr1 | -	AP	NA	NA	1	ACC	pathologic_T	"T3/T4" vs "T1/T2"	0.1277	0.00416	0.038	0.8734
DERL2_ES_38704	DERL2	ENSG00000072849	chr17 | -	ES	4.3	6	5.2	ACC	pathologic_T	"T3/T4" vs "T1/T2"	-0.175	0.00242	0.033	0.7722
DISC1_AT_10280	DISC1	ENSG00000162946	chr1 | +	AT	NA	NA	17	ACC	pathologic_T	"T3/T4" vs "T1/T2"	-0.1017	0.00424	0.038	1
DNAH14_AT_9968	DNAH14	ENSG00000185842	chr1 | +	AT	NA	NA	90	ACC	pathologic_T	"T3/T4" vs "T1/T2"	-0.2322	0.00312	0.036	0.8228
DNAH14_AT_9969	DNAH14	ENSG00000185842	chr1 | +	AT	NA	NA	9	ACC	pathologic_T	"T3/T4" vs "T1/T2"	0.2352	0.00312	0.036	0.8228
DPYSL2_AP_83132	DPYSL2	ENSG00000092964	chr8 | +	AP	NA	NA	1	ACC	pathologic_T	"T3/T4" vs "T1/T2"	0.1168	0.000146	0.00938	0.8228
DPYSL3_AP_73957	DPYSL3	ENSG00000113657	chr5 | -	AP	NA	NA	2.1	ACC	pathologic_T	"T3/T4" vs "T1/T2"	-0.2506	0.002	0.032	0.7595
DPYSL3_AP_73958	DPYSL3	ENSG00000113657	chr5 | -	AP	NA	NA	1	ACC	pathologic_T	"T3/T4" vs "T1/T2"	0.2506	0.002	0.032	0.7595
DUT_AP_30484	DUT	ENSG00000128951	chr15 | +	AP	NA	NA	2.1	ACC	pathologic_T	"T3/T4" vs "T1/T2"	-0.1204	4.98e-05	0.00542	0.9873
DUT_AP_30485	DUT	ENSG00000128951	chr15 | +	AP	NA	NA	3.1	ACC	pathologic_T	"T3/T4" vs "T1/T2"	0.1441	5.73e-05	0.00542	0.9873
FAM186B_AT_21593	FAM186B	ENSG00000135436	chr12 | -	AT	NA	NA	8	ACC	pathologic_T	"T3/T4" vs "T1/T2"	0.1155	0.00162	0.031	0.9241
FAM72A_AP_9575	FAM72A	ENSG00000196550	chr1 | +	AP	NA	NA	1	ACC	pathologic_T	"T3/T4" vs "T1/T2"	-0.1777	0.000661	0.025	0.9873
FAM72A_AP_9576	FAM72A	ENSG00000196550	chr1 | +	AP	NA	NA	3.1	ACC	pathologic_T	"T3/T4" vs "T1/T2"	0.1777	0.000661	0.025	0.9873
FAM72A_AT_9577	FAM72A	ENSG00000196550	chr1 | +	AT	NA	NA	2	ACC	pathologic_T	"T3/T4" vs "T1/T2"	-0.1314	0.00554	0.044	1
FAM72A_AT_9578	FAM72A	ENSG00000196550	chr1 | +	AT	NA	NA	6	ACC	pathologic_T	"T3/T4" vs "T1/T2"	0.1711	0.00383	0.038	1
FARP2_AT_58380	FARP2	ENSG00000006607	chr2 | +	AT	NA	NA	18.2	ACC	pathologic_T	"T3/T4" vs "T1/T2"	0.1526	0.00573	0.044	1
FARP2_AT_58381	FARP2	ENSG00000006607	chr2 | +	AT	NA	NA	28	ACC	pathologic_T	"T3/T4" vs "T1/T2"	-0.1526	0.00573	0.044	1
FNDC3A_AP_25871	FNDC3A	ENSG00000102531	chr13 | +	AP	NA	NA	2	ACC	pathologic_T	"T3/T4" vs "T1/T2"	0.104	0.000492	0.022	0.9241
FPGT-TNNI3K_AT_3455	FPGT-TNNI3K	ENSG00000259030	chr1 | +	AT	NA	NA	25	ACC	pathologic_T	"T3/T4" vs "T1/T2"	-0.1834	0.00318	0.036	0.8228
GGCX_ES_54288	GGCX	ENSG00000115486	chr2 | -	ES	1	3.1	2	ACC	pathologic_T	"T3/T4" vs "T1/T2"	-0.114	2.05e-05	0.00542	0.9873
GK5_ES_67108	GK5	ENSG00000175066	chr3 | -	ES	9	11	10	ACC	pathologic_T	"T3/T4" vs "T1/T2"	0.2241	0.008	0.048	0.962
HM13_ES_58892	HM13	ENSG00000101294	chr20 | +	ES	10	13	11:12.1:12.2	ACC	pathologic_T	"T3/T4" vs "T1/T2"	-0.2044	0.00156	0.031	0.9747
HOXC4_AP_22117	HOXC4	ENSG00000198353	chr12 | +	AP	NA	NA	1	ACC	pathologic_T	"T3/T4" vs "T1/T2"	0.1352	0.00807	0.048	0.8354
HOXC4_AP_22118	HOXC4	ENSG00000198353	chr12 | +	AP	NA	NA	3.1	ACC	pathologic_T	"T3/T4" vs "T1/T2"	-0.1352	0.00807	0.048	0.8354
IFI27L1_ES_29061	IFI27L1	ENSG00000165948	chr14 | +	ES	4.3	8	05:06:07.100000	ACC	pathologic_T	"T3/T4" vs "T1/T2"	-0.1064	0.00667	0.045	0.8354
IFIT3_AP_12488	IFIT3	ENSG00000119917	chr10 | +	AP	NA	NA	2	ACC	pathologic_T	"T3/T4" vs "T1/T2"	0.1461	0.00675	0.045	0.9367
IFIT3_AP_12489	IFIT3	ENSG00000119917	chr10 | +	AP	NA	NA	1	ACC	pathologic_T	"T3/T4" vs "T1/T2"	-0.1461	0.00675	0.045	0.9367
ING3_AT_81585	ING3	ENSG00000071243	chr7 | +	AT	NA	NA	4.3	ACC	pathologic_T	"T3/T4" vs "T1/T2"	0.1077	0.00252	0.033	1
ING3_AT_81586	ING3	ENSG00000071243	chr7 | +	AT	NA	NA	12	ACC	pathologic_T	"T3/T4" vs "T1/T2"	-0.1077	0.00252	0.033	1
INO80E_ES_36015	INO80E	ENSG00000169592	chr16 | +	ES	5	11	6.1:6.2:6.3	ACC	pathologic_T	"T3/T4" vs "T1/T2"	-0.2298	0.00351	0.036	1
INO80E_ES_36016	INO80E	ENSG00000169592	chr16 | +	ES	5	11	6.2:6.3	ACC	pathologic_T	"T3/T4" vs "T1/T2"	-0.1129	0.00818	0.048	1
KIF20B_AT_12497	KIF20B	ENSG00000138182	chr10 | +	AT	NA	NA	30	ACC	pathologic_T	"T3/T4" vs "T1/T2"	-0.155	0.00643	0.044	1
KIF20B_AT_12498	KIF20B	ENSG00000138182	chr10 | +	AT	NA	NA	34	ACC	pathologic_T	"T3/T4" vs "T1/T2"	0.155	0.00643	0.044	1
KIF4A_AT_89372	KIF4A	ENSG00000090889	chrX | +	AT	NA	NA	29	ACC	pathologic_T	"T3/T4" vs "T1/T2"	-0.2264	5e-05	0.00542	1
KIF4A_AT_89373	KIF4A	ENSG00000090889	chrX | +	AT	NA	NA	32	ACC	pathologic_T	"T3/T4" vs "T1/T2"	0.2264	5e-05	0.00542	1
KRT8_AP_21907	KRT8	ENSG00000170421	chr12 | -	AP	NA	NA	3.1	ACC	pathologic_T	"T3/T4" vs "T1/T2"	-0.4209	0.0064	0.044	0.7975
LARP6_AT_31442	LARP6	ENSG00000166173	chr15 | -	AT	NA	NA	4	ACC	pathologic_T	"T3/T4" vs "T1/T2"	-0.1997	0.00333	0.036	1
LARP6_AT_31443	LARP6	ENSG00000166173	chr15 | -	AT	NA	NA	2	ACC	pathologic_T	"T3/T4" vs "T1/T2"	0.1997	0.00333	0.036	1
MEIS2_AP_29907	MEIS2	ENSG00000134138	chr15 | -	AP	NA	NA	4.1	ACC	pathologic_T	"T3/T4" vs "T1/T2"	-0.1344	0.00594	0.044	0.9747
MPND_ES_46795	MPND	ENSG00000008382	chr19 | +	ES	10	12	11.1:11.2	ACC	pathologic_T	"T3/T4" vs "T1/T2"	-0.1653	0.00632	0.044	0.7848
MROH6_AP_85423	MROH6	ENSG00000204839	chr8 | -	AP	NA	NA	1	ACC	pathologic_T	"T3/T4" vs "T1/T2"	0.2824	0.00179	0.031	0.8861
MROH6_AP_85424	MROH6	ENSG00000204839	chr8 | -	AP	NA	NA	9.1	ACC	pathologic_T	"T3/T4" vs "T1/T2"	-0.2824	0.00179	0.031	0.8861
MRPL48_ES_17729	MRPL48	ENSG00000175581	chr11 | +	ES	4	8	05:06:00	ACC	pathologic_T	"T3/T4" vs "T1/T2"	0.152	0.0043	0.038	0.8101
MTL5_AT_17328	MTL5	ENSG00000132749	chr11 | -	AT	NA	NA	6.2	ACC	pathologic_T	"T3/T4" vs "T1/T2"	0.1418	0.00179	0.031	1
MTL5_AT_17329	MTL5	ENSG00000132749	chr11 | -	AT	NA	NA	10	ACC	pathologic_T	"T3/T4" vs "T1/T2"	-0.1418	0.00179	0.031	1
MTO1_ES_76748	MTO1	ENSG00000135297	chr6 | +	ES	7	9	8	ACC	pathologic_T	"T3/T4" vs "T1/T2"	0.1423	0.00417	0.038	0.8861
MYL6_ES_22384	MYL6	ENSG00000092841	chr12 | +	ES	1.4	3.1	2.1	ACC	pathologic_T	"T3/T4" vs "T1/T2"	-0.1173	0.000688	0.025	0.9873
NDUFC1_AP_70617	NDUFC1	ENSG00000109390	chr4 | -	AP	NA	NA	2.1	ACC	pathologic_T	"T3/T4" vs "T1/T2"	-0.1621	0.00161	0.031	0.9873
NDUFC1_AP_70618	NDUFC1	ENSG00000109390	chr4 | -	AP	NA	NA	1	ACC	pathologic_T	"T3/T4" vs "T1/T2"	0.1621	0.00161	0.031	0.9873
NEK2_AT_9717	NEK2	ENSG00000117650	chr1 | -	AT	NA	NA	8	ACC	pathologic_T	"T3/T4" vs "T1/T2"	0.1556	0.000428	0.02	1
NEK2_AT_9718	NEK2	ENSG00000117650	chr1 | -	AT	NA	NA	7.2	ACC	pathologic_T	"T3/T4" vs "T1/T2"	-0.1556	0.000419	0.02	1
NFATC4_AP_26986	NFATC4	ENSG00000100968	chr14 | +	AP	NA	NA	9.1	ACC	pathologic_T	"T3/T4" vs "T1/T2"	0.1243	0.00224	0.032	0.7975
ORC3_ES_76971	ORC3	ENSG00000135336	chr6 | +	ES	2	4	3	ACC	pathologic_T	"T3/T4" vs "T1/T2"	0.2209	0.00588	0.044	0.8228
PDZD7_AT_12862	PDZD7	ENSG00000186862	chr10 | -	AT	NA	NA	14	ACC	pathologic_T	"T3/T4" vs "T1/T2"	0.1361	0.00203	0.032	1
PGRMC2_AP_70575	PGRMC2	ENSG00000164040	chr4 | -	AP	NA	NA	2.1	ACC	pathologic_T	"T3/T4" vs "T1/T2"	0.1439	0.00217	0.032	0.9241
PILRB_RI_80936	PILRB	ENSG00000121716	chr7 | +	RI	8.3	8.5	8.4	ACC	pathologic_T	"T3/T4" vs "T1/T2"	-0.1534	0.00582	0.044	1
PISD_AP_61880	PISD	ENSG00000241878	chr22 | -	AP	NA	NA	1	ACC	pathologic_T	"T3/T4" vs "T1/T2"	-0.138	0.00585	0.044	0.8228
PLXNA4_AT_81829	PLXNA4	ENSG00000221866	chr7 | -	AT	NA	NA	36	ACC	pathologic_T	"T3/T4" vs "T1/T2"	0.1613	0.00299	0.036	0.9873
PLXNA4_AT_81831	PLXNA4	ENSG00000221866	chr7 | -	AT	NA	NA	7	ACC	pathologic_T	"T3/T4" vs "T1/T2"	-0.1613	0.00321	0.036	0.9873
PPP4C_ES_94130	PPP4C	ENSG00000149923	chr16 | +	ES	4	6	5.1:5.2	ACC	pathologic_T	"T3/T4" vs "T1/T2"	0.1033	0.00819	0.048	0.9241
RFX3_AT_85742	RFX3	ENSG00000080298	chr9 | -	AT	NA	NA	17.2	ACC	pathologic_T	"T3/T4" vs "T1/T2"	0.1054	0.0074	0.047	1
RFX3_AT_85744	RFX3	ENSG00000080298	chr9 | -	AT	NA	NA	19	ACC	pathologic_T	"T3/T4" vs "T1/T2"	-0.1054	0.0074	0.047	1
RNF180_AT_72195	RNF180	ENSG00000164197	chr5 | +	AT	NA	NA	5.2	ACC	pathologic_T	"T3/T4" vs "T1/T2"	0.2191	3.7e-05	0.00542	1
RNF180_AT_72196	RNF180	ENSG00000164197	chr5 | +	AT	NA	NA	8	ACC	pathologic_T	"T3/T4" vs "T1/T2"	-0.2191	3.7e-05	0.00542	1
RNF216_AA_78675	RNF216	ENSG00000011275	chr7 | -	AA	4	5.2	5.1	ACC	pathologic_T	"T3/T4" vs "T1/T2"	0.1318	0.00734	0.047	0.7975
RPS15A_ES_34260	RPS15A	ENSG00000134419	chr16 | -	ES	2.2	5.1	3.1:3.2:3.3	ACC	pathologic_T	"T3/T4" vs "T1/T2"	0.1203	0.00287	0.036	0.7975
RSRC2_ES_24969	RSRC2	ENSG00000111011	chr12 | -	ES	3	5.1	4	ACC	pathologic_T	"T3/T4" vs "T1/T2"	-0.1636	5.59e-05	0.00542	0.8101
SAC3D1_RI_16732	SAC3D1	ENSG00000168061	chr11 | +	RI	1.1	1.3	1.2	ACC	pathologic_T	"T3/T4" vs "T1/T2"	0.275	0.00674	0.045	0.8228
SCP2_ES_3045	SCP2	ENSG00000116171	chr1 | +	ES	11	13	12	ACC	pathologic_T	"T3/T4" vs "T1/T2"	0.2342	0.00175	0.031	1
SCRN2_ES_42123	SCRN2	ENSG00000141295	chr17 | -	ES	2.2	4.2	00:03:04.100000	ACC	pathologic_T	"T3/T4" vs "T1/T2"	-0.1632	0.00734	0.047	0.9494
SLC25A45_AP_16821	SLC25A45	ENSG00000162241	chr11 | -	AP	NA	NA	1	ACC	pathologic_T	"T3/T4" vs "T1/T2"	0.1512	0.0056	0.044	0.9873
SLC44A1_AT_87112	SLC44A1	ENSG00000070214	chr9 | +	AT	NA	NA	17	ACC	pathologic_T	"T3/T4" vs "T1/T2"	-0.1057	0.00126	0.028	1
SLC44A1_AT_87113	SLC44A1	ENSG00000070214	chr9 | +	AT	NA	NA	16.4	ACC	pathologic_T	"T3/T4" vs "T1/T2"	0.1057	0.00126	0.028	1
SLC7A9_RI_48905	SLC7A9	ENSG00000021488	chr19 | -	RI	7.1	7.3	7.2	ACC	pathologic_T	"T3/T4" vs "T1/T2"	-0.2576	0.00227	0.032	0.9114
ST7_AP_81553	ST7	ENSG00000004866	chr7 | +	AP	NA	NA	1	ACC	pathologic_T	"T3/T4" vs "T1/T2"	0.113	0.00214	0.032	0.9747
ST8SIA1_AT_20726	ST8SIA1	ENSG00000111728	chr12 | -	AT	NA	NA	7	ACC	pathologic_T	"T3/T4" vs "T1/T2"	-0.1566	0.000143	0.00938	1
ST8SIA1_AT_20727	ST8SIA1	ENSG00000111728	chr12 | -	AT	NA	NA	3	ACC	pathologic_T	"T3/T4" vs "T1/T2"	0.1566	0.000143	0.00938	1
SUOX_ES_22342	SUOX	ENSG00000139531	chr12 | +	ES	1	5.2	4	ACC	pathologic_T	"T3/T4" vs "T1/T2"	0.2551	0.00107	0.028	0.9367
SUOX_ES_22343	SUOX	ENSG00000139531	chr12 | +	ES	1	5.2	02:03:00	ACC	pathologic_T	"T3/T4" vs "T1/T2"	0.1764	0.00217	0.032	0.9873
SUV420H1_AT_17293	SUV420H1	ENSG00000110066	chr11 | -	AT	NA	NA	12.3	ACC	pathologic_T	"T3/T4" vs "T1/T2"	0.151	0.00612	0.044	1
SUV420H1_AT_17294	SUV420H1	ENSG00000110066	chr11 | -	AT	NA	NA	13	ACC	pathologic_T	"T3/T4" vs "T1/T2"	-0.151	0.00612	0.044	1
TANK_ES_55743	TANK	ENSG00000136560	chr2 | +	ES	2.2	4	3	ACC	pathologic_T	"T3/T4" vs "T1/T2"	0.1048	0.00116	0.028	0.9367
TANK_ES_55744	TANK	ENSG00000136560	chr2 | +	ES	2.1	4	2.2:3	ACC	pathologic_T	"T3/T4" vs "T1/T2"	0.2635	0.000951	0.027	0.8608
THAP2_AT_23408	THAP2	ENSG00000173451	chr12 | +	AT	NA	NA	2	ACC	pathologic_T	"T3/T4" vs "T1/T2"	0.1764	0.00345	0.036	1
THAP2_AT_23409	THAP2	ENSG00000173451	chr12 | +	AT	NA	NA	4	ACC	pathologic_T	"T3/T4" vs "T1/T2"	-0.1764	0.00345	0.036	1
TIMMDC1_ES_66310	TIMMDC1	ENSG00000113845	chr3 | +	ES	1.1	5	1.2:2:3:4	ACC	pathologic_T	"T3/T4" vs "T1/T2"	0.212	0.00493	0.041	0.8734
TMEM91_RI_50046	TMEM91	ENSG00000142046	chr19 | +	RI	7.1	7.4	7.2:7.3	ACC	pathologic_T	"T3/T4" vs "T1/T2"	-0.1173	0.000772	0.027	1
TOR2A_AD_87657	TOR2A	ENSG00000160404	chr9 | -	AD	3.1	3.5	3.2:3.3	ACC	pathologic_T	"T3/T4" vs "T1/T2"	-0.1482	0.00442	0.038	1
TROAP_AT_21551	TROAP	ENSG00000135451	chr12 | +	AT	NA	NA	10.2	ACC	pathologic_T	"T3/T4" vs "T1/T2"	-0.1155	0.000602	0.025	1
TTC39A_AT_2951	TTC39A	ENSG00000085831	chr1 | -	AT	NA	NA	21	ACC	pathologic_T	"T3/T4" vs "T1/T2"	-0.103	0.00285	0.036	1
UNG_AP_24277	UNG	ENSG00000076248	chr12 | +	AP	NA	NA	1	ACC	pathologic_T	"T3/T4" vs "T1/T2"	0.1524	0.00098	0.027	0.9873
UNG_AP_24278	UNG	ENSG00000076248	chr12 | +	AP	NA	NA	2.1	ACC	pathologic_T	"T3/T4" vs "T1/T2"	-0.1524	0.00098	0.027	0.9873
WASH4P_AA_32782	WASH4P	ENSG00000234769	chr16 | -	AA	1	3.2	3.1	ACC	pathologic_T	"T3/T4" vs "T1/T2"	-0.103	0.00205	0.032	0.9873
WDR62_RI_49337	WDR62	ENSG00000075702	chr19 | +	RI	25.5	25.8	25.6:25.7	ACC	pathologic_T	"T3/T4" vs "T1/T2"	-0.1161	0.00479	0.04	1
ZNF449_RI_90180	ZNF449	ENSG00000173275	chrX | +	RI	2.1	2.3	2.2	ACC	pathologic_T	"T3/T4" vs "T1/T2"	-0.1184	0.00755	0.047	0.8101
ZNF540_AP_49541	ZNF540	ENSG00000171817	chr19 | +	AP	NA	NA	2	ACC	pathologic_T	"T3/T4" vs "T1/T2"	-0.301	0.000161	0.00938	0.8101
ZNF540_AP_49542	ZNF540	ENSG00000171817	chr19 | +	AP	NA	NA	1	ACC	pathologic_T	"T3/T4" vs "T1/T2"	0.301	0.000152	0.00938	0.8101
ZNF544_ES_52428	ZNF544	ENSG00000198131	chr19 | +	ES	7.2	10.2	00:09:10.100000	ACC	pathologic_T	"T3/T4" vs "T1/T2"	0.1766	0.00777	0.048	1
ZNF670_AT_10507	ZNF670	ENSG00000135747	chr1 | -	AT	NA	NA	4	ACC	pathologic_T	"T3/T4" vs "T1/T2"	-0.1088	0.00874	0.049	1
ZNF670_AT_10509	ZNF670	ENSG00000135747	chr1 | -	AT	NA	NA	11	ACC	pathologic_T	"T3/T4" vs "T1/T2"	0.115	0.00846	0.048	1
ACOT11_AT_3145	ACOT11	ENSG00000162390	chr1 | +	AT	NA	NA	18	ACC	tumor_stage.diagnoses	"stage iii/iv" vs "stage i/ii"	0.2847	0.00719	0.045	1
ACOT11_AT_3146	ACOT11	ENSG00000162390	chr1 | +	AT	NA	NA	16	ACC	tumor_stage.diagnoses	"stage iii/iv" vs "stage i/ii"	-0.2847	0.00719	0.045	1
ADCK3_AP_10035	ADCK3	ENSG00000163050	chr1 | +	AP	NA	NA	7	ACC	tumor_stage.diagnoses	"stage iii/iv" vs "stage i/ii"	-0.1202	0.00652	0.044	1
ADCK3_AP_10036	ADCK3	ENSG00000163050	chr1 | +	AP	NA	NA	1	ACC	tumor_stage.diagnoses	"stage iii/iv" vs "stage i/ii"	0.1202	0.00652	0.044	1
ARL6IP4_AD_25036	ARL6IP4	ENSG00000182196	chr12 | +	AD	1.1	2.1	1.2:1.3:1.4	ACC	tumor_stage.diagnoses	"stage iii/iv" vs "stage i/ii"	-0.2229	0.00319	0.032	0.9494
ASPM_ES_9286	ASPM	ENSG00000066279	chr1 | -	ES	17	19	18	ACC	tumor_stage.diagnoses	"stage iii/iv" vs "stage i/ii"	-0.1529	0.00356	0.034	0.9367
BANF1_AD_16981	BANF1	ENSG00000175334	chr11 | +	AD	2.1	3	2.2	ACC	tumor_stage.diagnoses	"stage iii/iv" vs "stage i/ii"	-0.2468	0.00431	0.037	0.8481
C12orf76_AT_24403	C12orf76	ENSG00000174456	chr12 | -	AT	NA	NA	10.2	ACC	tumor_stage.diagnoses	"stage iii/iv" vs "stage i/ii"	0.112	0.00278	0.032	1
C20orf96_AP_58435	C20orf96	ENSG00000196476	chr20 | -	AP	NA	NA	2.1	ACC	tumor_stage.diagnoses	"stage iii/iv" vs "stage i/ii"	0.1096	0.000255	0.015	1
C20orf96_AP_58436	C20orf96	ENSG00000196476	chr20 | -	AP	NA	NA	1	ACC	tumor_stage.diagnoses	"stage iii/iv" vs "stage i/ii"	-0.1096	0.000255	0.015	1
C4orf19_AT_69000	C4orf19	ENSG00000154274	chr4 | +	AT	NA	NA	6	ACC	tumor_stage.diagnoses	"stage iii/iv" vs "stage i/ii"	0.3519	0.00563	0.042	0.9873
C4orf19_AT_69001	C4orf19	ENSG00000154274	chr4 | +	AT	NA	NA	5	ACC	tumor_stage.diagnoses	"stage iii/iv" vs "stage i/ii"	-0.3519	0.00563	0.042	0.9873
C6orf141_AT_76449	C6orf141	ENSG00000197261	chr6 | +	AT	NA	NA	5	ACC	tumor_stage.diagnoses	"stage iii/iv" vs "stage i/ii"	0.2151	0.00237	0.032	0.9873
CCAR2_AP_83035	CCAR2	ENSG00000158941	chr8 | +	AP	NA	NA	2	ACC	tumor_stage.diagnoses	"stage iii/iv" vs "stage i/ii"	0.1096	0.00375	0.034	0.9494
CCAR2_AP_83036	CCAR2	ENSG00000158941	chr8 | +	AP	NA	NA	1	ACC	tumor_stage.diagnoses	"stage iii/iv" vs "stage i/ii"	-0.1096	0.00375	0.034	0.9494
CMC4_AP_90668	CMC4	ENSG00000182712	chrX | -	AP	NA	NA	2	ACC	tumor_stage.diagnoses	"stage iii/iv" vs "stage i/ii"	0.1324	0.000135	0.012	1
CMC4_AP_90669	CMC4	ENSG00000182712	chrX | -	AP	NA	NA	1	ACC	tumor_stage.diagnoses	"stage iii/iv" vs "stage i/ii"	-0.1324	0.000135	0.012	1
COLCA2_AP_18663	COLCA2	ENSG00000214290	chr11 | +	AP	NA	NA	2	ACC	tumor_stage.diagnoses	"stage iii/iv" vs "stage i/ii"	-0.1355	0.00577	0.042	0.8101
COLCA2_AP_18664	COLCA2	ENSG00000214290	chr11 | +	AP	NA	NA	1	ACC	tumor_stage.diagnoses	"stage iii/iv" vs "stage i/ii"	0.1355	0.00577	0.042	0.8101
CREM_AP_11230	CREM	ENSG00000095794	chr10 | +	AP	NA	NA	12	ACC	tumor_stage.diagnoses	"stage iii/iv" vs "stage i/ii"	0.129	0.00464	0.038	0.9873
CREM_ES_11261	CREM	ENSG00000095794	chr10 | +	ES	4	15	9.2:10.1:11	ACC	tumor_stage.diagnoses	"stage iii/iv" vs "stage i/ii"	0.1852	0.000613	0.017	0.9241
CREM_ES_11264	CREM	ENSG00000095794	chr10 | +	ES	4	15	9.2:10.1	ACC	tumor_stage.diagnoses	"stage iii/iv" vs "stage i/ii"	0.1594	1.41e-05	0.00614	0.9494
CREM_ES_11293	CREM	ENSG00000095794	chr10 | +	ES	1	15	4	ACC	tumor_stage.diagnoses	"stage iii/iv" vs "stage i/ii"	-0.1551	0.000731	0.018	0.8861
CXXC5_AP_73623	CXXC5	ENSG00000171604	chr5 | +	AP	NA	NA	1	ACC	tumor_stage.diagnoses	"stage iii/iv" vs "stage i/ii"	0.1537	0.00576	0.042	0.8734
CXXC5_AP_73624	CXXC5	ENSG00000171604	chr5 | +	AP	NA	NA	2	ACC	tumor_stage.diagnoses	"stage iii/iv" vs "stage i/ii"	-0.1537	0.00576	0.042	0.8734
DDB2_ES_15675	DDB2	ENSG00000134574	chr11 | +	ES	3	8	04:05:07	ACC	tumor_stage.diagnoses	"stage iii/iv" vs "stage i/ii"	-0.1424	0.00611	0.043	0.962
DNAH14_AT_9968	DNAH14	ENSG00000185842	chr1 | +	AT	NA	NA	90	ACC	tumor_stage.diagnoses	"stage iii/iv" vs "stage i/ii"	-0.236	0.000692	0.018	0.8228
DNAH14_AT_9969	DNAH14	ENSG00000185842	chr1 | +	AT	NA	NA	9	ACC	tumor_stage.diagnoses	"stage iii/iv" vs "stage i/ii"	0.236	0.000692	0.018	0.8228
DNASE1L3_RI_65424	DNASE1L3	ENSG00000163687	chr3 | -	RI	9.1	9.3	9.2	ACC	tumor_stage.diagnoses	"stage iii/iv" vs "stage i/ii"	0.1266	0.00105	0.021	0.9873
DPYSL2_AP_83131	DPYSL2	ENSG00000092964	chr8 | +	AP	NA	NA	2	ACC	tumor_stage.diagnoses	"stage iii/iv" vs "stage i/ii"	-0.102	0.00107	0.021	0.8228
DPYSL2_AP_83132	DPYSL2	ENSG00000092964	chr8 | +	AP	NA	NA	1	ACC	tumor_stage.diagnoses	"stage iii/iv" vs "stage i/ii"	0.1108	7.05e-05	0.00869	0.8228
DUT_AP_30484	DUT	ENSG00000128951	chr15 | +	AP	NA	NA	2.1	ACC	tumor_stage.diagnoses	"stage iii/iv" vs "stage i/ii"	-0.1119	6.62e-05	0.00869	0.9873
DUT_AP_30485	DUT	ENSG00000128951	chr15 | +	AP	NA	NA	3.1	ACC	tumor_stage.diagnoses	"stage iii/iv" vs "stage i/ii"	0.1265	0.000124	0.012	0.9873
FAM186B_AT_21593	FAM186B	ENSG00000135436	chr12 | -	AT	NA	NA	8	ACC	tumor_stage.diagnoses	"stage iii/iv" vs "stage i/ii"	0.1299	1.95e-05	0.00614	0.9241
FAM211B_ES_61457	FAM211B	ENSG00000178026	chr22 | -	ES	3	5	4	ACC	tumor_stage.diagnoses	"stage iii/iv" vs "stage i/ii"	-0.122	0.0076	0.046	0.962
FAM72A_AP_9575	FAM72A	ENSG00000196550	chr1 | +	AP	NA	NA	1	ACC	tumor_stage.diagnoses	"stage iii/iv" vs "stage i/ii"	-0.2061	0.000581	0.017	0.9873
FAM72A_AP_9576	FAM72A	ENSG00000196550	chr1 | +	AP	NA	NA	3.1	ACC	tumor_stage.diagnoses	"stage iii/iv" vs "stage i/ii"	0.2061	0.000581	0.017	0.9873
FAM72A_AT_9577	FAM72A	ENSG00000196550	chr1 | +	AT	NA	NA	2	ACC	tumor_stage.diagnoses	"stage iii/iv" vs "stage i/ii"	-0.1366	0.00207	0.03	1
FAM72A_AT_9578	FAM72A	ENSG00000196550	chr1 | +	AT	NA	NA	6	ACC	tumor_stage.diagnoses	"stage iii/iv" vs "stage i/ii"	0.1702	0.00165	0.027	1
FGFR1OP2_ES_20856	FGFR1OP2	ENSG00000111790	chr12 | +	ES	4	6	5.1	ACC	tumor_stage.diagnoses	"stage iii/iv" vs "stage i/ii"	-0.1453	0.00773	0.046	0.9367
FNDC3A_AP_25872	FNDC3A	ENSG00000102531	chr13 | +	AP	NA	NA	5	ACC	tumor_stage.diagnoses	"stage iii/iv" vs "stage i/ii"	-0.1184	0.00676	0.044	0.9241
GABARAP_ES_38869	GABARAP	ENSG00000170296	chr17 | -	ES	1.1	2.1	1.2:1.5	ACC	tumor_stage.diagnoses	"stage iii/iv" vs "stage i/ii"	-0.1172	0.00527	0.042	0.9114
GADL1_AT_63807	GADL1	ENSG00000144644	chr3 | -	AT	NA	NA	15	ACC	tumor_stage.diagnoses	"stage iii/iv" vs "stage i/ii"	-0.1124	0.00302	0.032	1
GADL1_AT_63808	GADL1	ENSG00000144644	chr3 | -	AT	NA	NA	12.2	ACC	tumor_stage.diagnoses	"stage iii/iv" vs "stage i/ii"	0.1124	0.00302	0.032	1
GRAMD1C_AP_66223	GRAMD1C	ENSG00000178075	chr3 | +	AP	NA	NA	8	ACC	tumor_stage.diagnoses	"stage iii/iv" vs "stage i/ii"	-0.3029	0.00431	0.037	0.9494
H2AFY_ME_96931	H2AFY	ENSG00000113648	chr5 | -	ME	6.3	9	7|8	ACC	tumor_stage.diagnoses	"stage iii/iv" vs "stage i/ii"	0.1094	0.0059	0.042	1
ING3_AT_81585	ING3	ENSG00000071243	chr7 | +	AT	NA	NA	4.3	ACC	tumor_stage.diagnoses	"stage iii/iv" vs "stage i/ii"	0.112	0.00319	0.032	1
ING3_AT_81586	ING3	ENSG00000071243	chr7 | +	AT	NA	NA	12	ACC	tumor_stage.diagnoses	"stage iii/iv" vs "stage i/ii"	-0.112	0.00319	0.032	1
INO80E_ES_36015	INO80E	ENSG00000169592	chr16 | +	ES	5	11	6.1:6.2:6.3	ACC	tumor_stage.diagnoses	"stage iii/iv" vs "stage i/ii"	-0.2387	0.00107	0.021	1
INO80E_ES_36016	INO80E	ENSG00000169592	chr16 | +	ES	5	11	6.2:6.3	ACC	tumor_stage.diagnoses	"stage iii/iv" vs "stage i/ii"	-0.1127	0.00346	0.033	1
IRF3_AD_51023	IRF3	ENSG00000126456	chr19 | -	AD	1.1	2	1.2:1.3:1.4:1.5	ACC	tumor_stage.diagnoses	"stage iii/iv" vs "stage i/ii"	-0.1718	0.00623	0.043	0.8481
IRF3_ES_51025	IRF3	ENSG00000126456	chr19 | -	ES	1.1	2	1.4:1.5	ACC	tumor_stage.diagnoses	"stage iii/iv" vs "stage i/ii"	-0.1364	0.00439	0.037	0.7848
KIF20B_AT_12497	KIF20B	ENSG00000138182	chr10 | +	AT	NA	NA	30	ACC	tumor_stage.diagnoses	"stage iii/iv" vs "stage i/ii"	-0.1636	0.00472	0.038	1
KIF20B_AT_12498	KIF20B	ENSG00000138182	chr10 | +	AT	NA	NA	34	ACC	tumor_stage.diagnoses	"stage iii/iv" vs "stage i/ii"	0.1636	0.00472	0.038	1
KIF4A_AT_89372	KIF4A	ENSG00000090889	chrX | +	AT	NA	NA	29	ACC	tumor_stage.diagnoses	"stage iii/iv" vs "stage i/ii"	-0.1636	0.000181	0.014	1
KIF4A_AT_89373	KIF4A	ENSG00000090889	chrX | +	AT	NA	NA	32	ACC	tumor_stage.diagnoses	"stage iii/iv" vs "stage i/ii"	0.1636	0.000181	0.014	1
KRT8_AP_21907	KRT8	ENSG00000170421	chr12 | -	AP	NA	NA	3.1	ACC	tumor_stage.diagnoses	"stage iii/iv" vs "stage i/ii"	-0.4946	0.000561	0.017	0.7975
KRT8_AP_21908	KRT8	ENSG00000170421	chr12 | -	AP	NA	NA	1.1	ACC	tumor_stage.diagnoses	"stage iii/iv" vs "stage i/ii"	0.371	0.0037	0.034	0.7975
LAMC2_AT_9169	LAMC2	ENSG00000058085	chr1 | +	AT	NA	NA	22.2	ACC	tumor_stage.diagnoses	"stage iii/iv" vs "stage i/ii"	0.2794	0.000383	0.016	0.9873
LAMC2_AT_9170	LAMC2	ENSG00000058085	chr1 | +	AT	NA	NA	23	ACC	tumor_stage.diagnoses	"stage iii/iv" vs "stage i/ii"	-0.2794	0.000383	0.016	0.9873
LIG1_AD_50689	LIG1	ENSG00000105486	chr19 | -	AD	24.1	25	24.2	ACC	tumor_stage.diagnoses	"stage iii/iv" vs "stage i/ii"	-0.1276	0.00248	0.032	1
MEIS2_AP_29907	MEIS2	ENSG00000134138	chr15 | -	AP	NA	NA	4.1	ACC	tumor_stage.diagnoses	"stage iii/iv" vs "stage i/ii"	-0.131	0.000711	0.018	0.9747
MKNK2_AA_46570	MKNK2	ENSG00000099875	chr19 | -	AA	13.1	14.2	14.1	ACC	tumor_stage.diagnoses	"stage iii/iv" vs "stage i/ii"	-0.1306	0.00376	0.034	1
MPND_ES_46795	MPND	ENSG00000008382	chr19 | +	ES	10	12	11.1:11.2	ACC	tumor_stage.diagnoses	"stage iii/iv" vs "stage i/ii"	-0.1727	0.00243	0.032	0.7848
MROH6_AP_85423	MROH6	ENSG00000204839	chr8 | -	AP	NA	NA	1	ACC	tumor_stage.diagnoses	"stage iii/iv" vs "stage i/ii"	0.2765	0.00053	0.017	0.8861
MROH6_AP_85424	MROH6	ENSG00000204839	chr8 | -	AP	NA	NA	9.1	ACC	tumor_stage.diagnoses	"stage iii/iv" vs "stage i/ii"	-0.2765	0.00053	0.017	0.8861
MYL6_ES_22384	MYL6	ENSG00000092841	chr12 | +	ES	1.4	3.1	2.1	ACC	tumor_stage.diagnoses	"stage iii/iv" vs "stage i/ii"	-0.1194	0.000604	0.017	0.9873
NDUFB3_AA_56780	NDUFB3	ENSG00000119013	chr2 | +	AA	1	2.2	2.1	ACC	tumor_stage.diagnoses	"stage iii/iv" vs "stage i/ii"	0.1584	0.00545	0.042	0.8101
NEK2_AT_9717	NEK2	ENSG00000117650	chr1 | -	AT	NA	NA	8	ACC	tumor_stage.diagnoses	"stage iii/iv" vs "stage i/ii"	0.1449	0.00211	0.03	1
NEK2_AT_9718	NEK2	ENSG00000117650	chr1 | -	AT	NA	NA	7.2	ACC	tumor_stage.diagnoses	"stage iii/iv" vs "stage i/ii"	-0.1449	0.00178	0.028	1
NFE2L1_ES_42160	NFE2L1	ENSG00000082641	chr17 | +	ES	5.2	7	6	ACC	tumor_stage.diagnoses	"stage iii/iv" vs "stage i/ii"	-0.137	0.0014	0.026	1
OAZ1_ES_46599	OAZ1	ENSG00000104904	chr19 | +	ES	1	4	3.2:3.3:3.4:3.5	ACC	tumor_stage.diagnoses	"stage iii/iv" vs "stage i/ii"	-0.1805	0.00304	0.032	0.9873
ORC3_ES_76971	ORC3	ENSG00000135336	chr6 | +	ES	2	4	3	ACC	tumor_stage.diagnoses	"stage iii/iv" vs "stage i/ii"	0.2178	0.00449	0.037	0.8228
PARP11_ES_19764	PARP11	ENSG00000111224	chr12 | -	ES	3	5	4	ACC	tumor_stage.diagnoses	"stage iii/iv" vs "stage i/ii"	0.1058	0.00728	0.045	0.7975
PDCD5_AP_48877	PDCD5	ENSG00000105185	chr19 | +	AP	NA	NA	1	ACC	tumor_stage.diagnoses	"stage iii/iv" vs "stage i/ii"	0.185	0.00257	0.032	1
PDCD5_AP_48878	PDCD5	ENSG00000105185	chr19 | +	AP	NA	NA	2	ACC	tumor_stage.diagnoses	"stage iii/iv" vs "stage i/ii"	-0.185	0.00257	0.032	1
PDZD7_AT_12862	PDZD7	ENSG00000186862	chr10 | -	AT	NA	NA	14	ACC	tumor_stage.diagnoses	"stage iii/iv" vs "stage i/ii"	0.1504	0.00143	0.026	1
PDZD7_AT_12864	PDZD7	ENSG00000186862	chr10 | -	AT	NA	NA	8	ACC	tumor_stage.diagnoses	"stage iii/iv" vs "stage i/ii"	-0.1011	0.00408	0.036	1
PILRB_RI_80936	PILRB	ENSG00000121716	chr7 | +	RI	8.3	8.5	8.4	ACC	tumor_stage.diagnoses	"stage iii/iv" vs "stage i/ii"	-0.1522	0.00784	0.046	1
PLXNA4_AT_81829	PLXNA4	ENSG00000221866	chr7 | -	AT	NA	NA	36	ACC	tumor_stage.diagnoses	"stage iii/iv" vs "stage i/ii"	0.1537	0.00662	0.044	0.9873
PLXNA4_AT_81831	PLXNA4	ENSG00000221866	chr7 | -	AT	NA	NA	7	ACC	tumor_stage.diagnoses	"stage iii/iv" vs "stage i/ii"	-0.1537	0.00706	0.045	0.9873
PPP4C_ES_94130	PPP4C	ENSG00000149923	chr16 | +	ES	4	6	5.1:5.2	ACC	tumor_stage.diagnoses	"stage iii/iv" vs "stage i/ii"	0.1226	0.00278	0.032	0.9241
RFX3_AT_85742	RFX3	ENSG00000080298	chr9 | -	AT	NA	NA	17.2	ACC	tumor_stage.diagnoses	"stage iii/iv" vs "stage i/ii"	0.1168	0.00139	0.026	1
RFX3_AT_85744	RFX3	ENSG00000080298	chr9 | -	AT	NA	NA	19	ACC	tumor_stage.diagnoses	"stage iii/iv" vs "stage i/ii"	-0.1168	0.00139	0.026	1
RNF165_AT_45394	RNF165	ENSG00000141622	chr18 | +	AT	NA	NA	8	ACC	tumor_stage.diagnoses	"stage iii/iv" vs "stage i/ii"	-0.3664	0.00145	0.026	0.962
RNF165_AT_45395	RNF165	ENSG00000141622	chr18 | +	AT	NA	NA	1.5	ACC	tumor_stage.diagnoses	"stage iii/iv" vs "stage i/ii"	0.3664	0.00145	0.026	0.962
RNF180_AT_72195	RNF180	ENSG00000164197	chr5 | +	AT	NA	NA	5.2	ACC	tumor_stage.diagnoses	"stage iii/iv" vs "stage i/ii"	0.2154	3.73e-05	0.00614	1
RNF180_AT_72196	RNF180	ENSG00000164197	chr5 | +	AT	NA	NA	8	ACC	tumor_stage.diagnoses	"stage iii/iv" vs "stage i/ii"	-0.2154	3.73e-05	0.00614	1
RPL10_AP_90568	RPL10	ENSG00000147403	chrX | +	AP	NA	NA	1	ACC	tumor_stage.diagnoses	"stage iii/iv" vs "stage i/ii"	-0.1956	0.00167	0.027	0.8987
RPL10_AP_90570	RPL10	ENSG00000147403	chrX | +	AP	NA	NA	3	ACC	tumor_stage.diagnoses	"stage iii/iv" vs "stage i/ii"	0.1956	0.00167	0.027	0.8987
RSRC2_ES_24969	RSRC2	ENSG00000111011	chr12 | -	ES	3	5.1	4	ACC	tumor_stage.diagnoses	"stage iii/iv" vs "stage i/ii"	-0.1485	0.000526	0.017	0.8101
RTKN2_AT_11870	RTKN2	ENSG00000182010	chr10 | -	AT	NA	NA	5.2	ACC	tumor_stage.diagnoses	"stage iii/iv" vs "stage i/ii"	0.1327	0.0034	0.033	0.9747
SAC3D1_RI_16732	SAC3D1	ENSG00000168061	chr11 | +	RI	1.1	1.3	1.2	ACC	tumor_stage.diagnoses	"stage iii/iv" vs "stage i/ii"	0.2887	0.00194	0.029	0.8228
SCP2_ES_3045	SCP2	ENSG00000116171	chr1 | +	ES	11	13	12	ACC	tumor_stage.diagnoses	"stage iii/iv" vs "stage i/ii"	0.2291	0.00178	0.028	1
SLC44A2_AP_47558	SLC44A2	ENSG00000129353	chr19 | +	AP	NA	NA	1	ACC	tumor_stage.diagnoses	"stage iii/iv" vs "stage i/ii"	-0.1512	0.00235	0.032	0.8101
SLC44A2_AP_47559	SLC44A2	ENSG00000129353	chr19 | +	AP	NA	NA	2	ACC	tumor_stage.diagnoses	"stage iii/iv" vs "stage i/ii"	0.1512	0.00235	0.032	0.8101
SLC7A9_RI_48905	SLC7A9	ENSG00000021488	chr19 | -	RI	7.1	7.3	7.2	ACC	tumor_stage.diagnoses	"stage iii/iv" vs "stage i/ii"	-0.2416	0.00229	0.032	0.9114
SSFA2_AP_56438	SSFA2	ENSG00000138434	chr2 | +	AP	NA	NA	3	ACC	tumor_stage.diagnoses	"stage iii/iv" vs "stage i/ii"	0.1512	0.00448	0.037	0.9494
SSFA2_AP_56439	SSFA2	ENSG00000138434	chr2 | +	AP	NA	NA	1	ACC	tumor_stage.diagnoses	"stage iii/iv" vs "stage i/ii"	-0.1512	0.00655	0.044	0.9494
ST7_AP_81553	ST7	ENSG00000004866	chr7 | +	AP	NA	NA	1	ACC	tumor_stage.diagnoses	"stage iii/iv" vs "stage i/ii"	0.1014	0.00228	0.032	0.9747
ST8SIA1_AT_20726	ST8SIA1	ENSG00000111728	chr12 | -	AT	NA	NA	7	ACC	tumor_stage.diagnoses	"stage iii/iv" vs "stage i/ii"	-0.14	0.000359	0.016	1
ST8SIA1_AT_20727	ST8SIA1	ENSG00000111728	chr12 | -	AT	NA	NA	3	ACC	tumor_stage.diagnoses	"stage iii/iv" vs "stage i/ii"	0.14	0.000359	0.016	1
STAR_ES_97911	STAR	ENSG00000147465	chr8 | -	ES	4	7	5	ACC	tumor_stage.diagnoses	"stage iii/iv" vs "stage i/ii"	0.1088	0.0034	0.033	0.962
SUOX_ES_22342	SUOX	ENSG00000139531	chr12 | +	ES	1	5.2	4	ACC	tumor_stage.diagnoses	"stage iii/iv" vs "stage i/ii"	0.2358	0.000961	0.021	0.9367
SUOX_ES_22343	SUOX	ENSG00000139531	chr12 | +	ES	1	5.2	02:03:00	ACC	tumor_stage.diagnoses	"stage iii/iv" vs "stage i/ii"	0.182	0.00182	0.028	0.9873
SUV420H1_AT_17293	SUV420H1	ENSG00000110066	chr11 | -	AT	NA	NA	12.3	ACC	tumor_stage.diagnoses	"stage iii/iv" vs "stage i/ii"	0.1686	0.000964	0.021	1
SUV420H1_AT_17294	SUV420H1	ENSG00000110066	chr11 | -	AT	NA	NA	13	ACC	tumor_stage.diagnoses	"stage iii/iv" vs "stage i/ii"	-0.1686	0.000964	0.021	1
TANK_ES_55743	TANK	ENSG00000136560	chr2 | +	ES	2.2	4	3	ACC	tumor_stage.diagnoses	"stage iii/iv" vs "stage i/ii"	0.1133	0.000533	0.017	0.9367
TANK_ES_55744	TANK	ENSG00000136560	chr2 | +	ES	2.1	4	2.2:3	ACC	tumor_stage.diagnoses	"stage iii/iv" vs "stage i/ii"	0.2673	0.00195	0.029	0.8608
TAOK3_AP_24700	TAOK3	ENSG00000135090	chr12 | -	AP	NA	NA	15.1	ACC	tumor_stage.diagnoses	"stage iii/iv" vs "stage i/ii"	-0.2173	0.00303	0.032	0.9747
TFR2_ES_80980	TFR2	ENSG00000106327	chr7 | -	ES	7	11	08:09:10	ACC	tumor_stage.diagnoses	"stage iii/iv" vs "stage i/ii"	-0.161	0.00303	0.032	0.9747
THAP2_AT_23408	THAP2	ENSG00000173451	chr12 | +	AT	NA	NA	2	ACC	tumor_stage.diagnoses	"stage iii/iv" vs "stage i/ii"	0.1682	0.00407	0.036	1
THAP2_AT_23409	THAP2	ENSG00000173451	chr12 | +	AT	NA	NA	4	ACC	tumor_stage.diagnoses	"stage iii/iv" vs "stage i/ii"	-0.1682	0.00407	0.036	1
THTPA_AD_26763	THTPA	ENSG00000259431	chr14 | +	AD	1.1	2	1.2:1.3:1.4	ACC	tumor_stage.diagnoses	"stage iii/iv" vs "stage i/ii"	-0.1094	0.00328	0.033	0.7848
TIMM50_ES_49837	TIMM50	ENSG00000105197	chr19 | +	ES	1	9	2:3:4:6:7:8	ACC	tumor_stage.diagnoses	"stage iii/iv" vs "stage i/ii"	-0.1229	0.00754	0.046	0.8228
TIMMDC1_ES_66310	TIMMDC1	ENSG00000113845	chr3 | +	ES	1.1	5	1.2:2:3:4	ACC	tumor_stage.diagnoses	"stage iii/iv" vs "stage i/ii"	0.2176	0.00703	0.045	0.8734
TMEM91_RI_50046	TMEM91	ENSG00000142046	chr19 | +	RI	7.1	7.4	7.2:7.3	ACC	tumor_stage.diagnoses	"stage iii/iv" vs "stage i/ii"	-0.1222	0.000252	0.015	1
TOR2A_AA_87656	TOR2A	ENSG00000160404	chr9 | -	AA	3.1	3.5	3.3:3.4	ACC	tumor_stage.diagnoses	"stage iii/iv" vs "stage i/ii"	-0.1224	0.00812	0.048	0.8987
TOR2A_AD_87657	TOR2A	ENSG00000160404	chr9 | -	AD	3.1	3.5	3.2:3.3	ACC	tumor_stage.diagnoses	"stage iii/iv" vs "stage i/ii"	-0.154	0.000319	0.016	1
TRABD_AP_62789	TRABD	ENSG00000170638	chr22 | +	AP	NA	NA	2	ACC	tumor_stage.diagnoses	"stage iii/iv" vs "stage i/ii"	-0.1422	0.000848	0.02	0.8734
TRAPPC2L_ES_94318	TRAPPC2L	ENSG00000167515	chr16 | +	ES	3.2	5.1	4.4	ACC	tumor_stage.diagnoses	"stage iii/iv" vs "stage i/ii"	-0.1593	0.000752	0.018	0.8354
TRIM7_AT_75046	TRIM7	ENSG00000146054	chr5 | -	AT	NA	NA	8	ACC	tumor_stage.diagnoses	"stage iii/iv" vs "stage i/ii"	-0.1608	0.00725	0.045	1
TRIM7_AT_75047	TRIM7	ENSG00000146054	chr5 | -	AT	NA	NA	3.3	ACC	tumor_stage.diagnoses	"stage iii/iv" vs "stage i/ii"	0.1608	0.00725	0.045	1
TROAP_AT_21551	TROAP	ENSG00000135451	chr12 | +	AT	NA	NA	10.2	ACC	tumor_stage.diagnoses	"stage iii/iv" vs "stage i/ii"	-0.1198	0.00153	0.027	1
TTC39A_AT_2950	TTC39A	ENSG00000085831	chr1 | -	AT	NA	NA	15.5	ACC	tumor_stage.diagnoses	"stage iii/iv" vs "stage i/ii"	0.1027	0.00165	0.027	1
UGT1A1_AT_58054	UGT1A1	ENSG00000242366	chr2 | +	AT	NA	NA	10	ACC	tumor_stage.diagnoses	"stage iii/iv" vs "stage i/ii"	-0.3063	0.00298	0.032	0.8987
UGT1A1_AT_58055	UGT1A1	ENSG00000242366	chr2 | +	AT	NA	NA	9	ACC	tumor_stage.diagnoses	"stage iii/iv" vs "stage i/ii"	0.3063	0.00298	0.032	0.8987
UNG_AP_24277	UNG	ENSG00000076248	chr12 | +	AP	NA	NA	1	ACC	tumor_stage.diagnoses	"stage iii/iv" vs "stage i/ii"	0.1101	0.00424	0.037	0.9873
UNG_AP_24278	UNG	ENSG00000076248	chr12 | +	AP	NA	NA	2.1	ACC	tumor_stage.diagnoses	"stage iii/iv" vs "stage i/ii"	-0.1101	0.00424	0.037	0.9873
VWA5A_AT_19211	VWA5A	ENSG00000110002	chr11 | +	AT	NA	NA	10.2	ACC	tumor_stage.diagnoses	"stage iii/iv" vs "stage i/ii"	0.1283	0.00277	0.032	1
VWA5A_AT_19212	VWA5A	ENSG00000110002	chr11 | +	AT	NA	NA	18	ACC	tumor_stage.diagnoses	"stage iii/iv" vs "stage i/ii"	-0.1283	0.00277	0.032	1
WDR62_RI_49337	WDR62	ENSG00000075702	chr19 | +	RI	25.5	25.8	25.6:25.7	ACC	tumor_stage.diagnoses	"stage iii/iv" vs "stage i/ii"	-0.1444	0.000596	0.017	1
ZNF331_AP_51722	ZNF331	ENSG00000130844	chr19 | +	AP	NA	NA	1	ACC	tumor_stage.diagnoses	"stage iii/iv" vs "stage i/ii"	0.2186	0.00761	0.046	0.9873
ZNF44_AT_47791	ZNF44	ENSG00000197857	chr19 | -	AT	NA	NA	6.2	ACC	tumor_stage.diagnoses	"stage iii/iv" vs "stage i/ii"	0.101	0.00207	0.03	1
ZNF449_RI_90180	ZNF449	ENSG00000173275	chrX | +	RI	2.1	2.3	2.2	ACC	tumor_stage.diagnoses	"stage iii/iv" vs "stage i/ii"	-0.1114	0.00672	0.044	0.8101
ZNF467_AA_82205	ZNF467	ENSG00000181444	chr7 | -	AA	4	5.2	5.1	ACC	tumor_stage.diagnoses	"stage iii/iv" vs "stage i/ii"	-0.1326	3.08e-05	0.00614	1
ZNF540_AP_49541	ZNF540	ENSG00000171817	chr19 | +	AP	NA	NA	2	ACC	tumor_stage.diagnoses	"stage iii/iv" vs "stage i/ii"	-0.2195	0.000342	0.016	0.8101
ZNF540_AP_49542	ZNF540	ENSG00000171817	chr19 | +	AP	NA	NA	1	ACC	tumor_stage.diagnoses	"stage iii/iv" vs "stage i/ii"	0.153	0.000449	0.017	0.8101
ZNF670_AT_10507	ZNF670	ENSG00000135747	chr1 | -	AT	NA	NA	4	ACC	tumor_stage.diagnoses	"stage iii/iv" vs "stage i/ii"	-0.1027	0.00405	0.036	1
ZNF670_AT_10509	ZNF670	ENSG00000135747	chr1 | -	AT	NA	NA	11	ACC	tumor_stage.diagnoses	"stage iii/iv" vs "stage i/ii"	0.1072	0.00342	0.033	1
ZNF720_AT_36283	ZNF720	ENSG00000197302	chr16 | +	AT	NA	NA	5.4	ACC	tumor_stage.diagnoses	"stage iii/iv" vs "stage i/ii"	0.131	0.00573	0.042	1
ZNF720_AT_36284	ZNF720	ENSG00000197302	chr16 | +	AT	NA	NA	8	ACC	tumor_stage.diagnoses	"stage iii/iv" vs "stage i/ii"	-0.131	0.00573	0.042	1
ABCC6_AT_34219	ABCC6	ENSG00000091262	chr16 | -	AT	NA	NA	2.2	BLCA	diagnosis_subtype	"Papillary" vs "Non-Papillary"	-0.1192	0.0027	0.00715	1
ABCC6_AT_34220	ABCC6	ENSG00000091262	chr16 | -	AT	NA	NA	32	BLCA	diagnosis_subtype	"Papillary" vs "Non-Papillary"	0.1192	0.0027	0.00715	1
ACAP1_AP_38921	ACAP1	ENSG00000072818	chr17 | +	AP	NA	NA	1	BLCA	diagnosis_subtype	"Papillary" vs "Non-Papillary"	-0.1686	0.000998	0.00306	0.9529
ACOT9_ES_88694	ACOT9	ENSG00000123130	chrX | -	ES	5.1	7.1	6	BLCA	diagnosis_subtype	"Papillary" vs "Non-Papillary"	-0.1099	4.12e-05	0.000239	0.9247
ACOXL_AT_54941	ACOXL	ENSG00000153093	chr2 | +	AT	NA	NA	21	BLCA	diagnosis_subtype	"Papillary" vs "Non-Papillary"	0.1012	6.15e-07	9.84e-06	0.9906
ACSL6_AT_73246	ACSL6	ENSG00000164398	chr5 | -	AT	NA	NA	27	BLCA	diagnosis_subtype	"Papillary" vs "Non-Papillary"	0.1436	0.00242	0.00657	0.9953
ACSL6_AT_73248	ACSL6	ENSG00000164398	chr5 | -	AT	NA	NA	39	BLCA	diagnosis_subtype	"Papillary" vs "Non-Papillary"	-0.1436	0.00242	0.00657	0.9953
ADAT2_AP_77977	ADAT2	ENSG00000189007	chr6 | -	AP	NA	NA	1	BLCA	diagnosis_subtype	"Papillary" vs "Non-Papillary"	-0.1006	5.38e-05	0.000295	0.9694
ADAT2_AP_77978	ADAT2	ENSG00000189007	chr6 | -	AP	NA	NA	2	BLCA	diagnosis_subtype	"Papillary" vs "Non-Papillary"	0.1006	5.38e-05	0.000295	0.9694
AHI1_ES_77894	AHI1	ENSG00000135541	chr6 | -	ES	30.1	33	1 day, 7:32:00	BLCA	diagnosis_subtype	"Papillary" vs "Non-Papillary"	0.1358	1.16e-05	9.14e-05	0.9576
AKNAD1_AT_3952	AKNAD1	ENSG00000162641	chr1 | -	AT	NA	NA	9.2	BLCA	diagnosis_subtype	"Papillary" vs "Non-Papillary"	0.103	0.00936	0.02	0.7647
ANGEL1_AP_28557	ANGEL1	ENSG00000013523	chr14 | -	AP	NA	NA	1	BLCA	diagnosis_subtype	"Papillary" vs "Non-Papillary"	-0.128	3.44e-06	3.78e-05	0.9576
ANGEL1_AP_28558	ANGEL1	ENSG00000013523	chr14 | -	AP	NA	NA	7.1	BLCA	diagnosis_subtype	"Papillary" vs "Non-Papillary"	0.128	3.44e-06	3.78e-05	0.9576
ANKRD18A_AT_86459	ANKRD18A	ENSG00000180071	chr9 | -	AT	NA	NA	22	BLCA	diagnosis_subtype	"Papillary" vs "Non-Papillary"	0.1074	0.00048	0.00168	0.9741
ANKRD18A_AT_86460	ANKRD18A	ENSG00000180071	chr9 | -	AT	NA	NA	17.2	BLCA	diagnosis_subtype	"Papillary" vs "Non-Papillary"	-0.1074	0.00048	0.00168	0.9741
ANKRD49_RI_18344	ANKRD49	ENSG00000168876	chr11 | +	RI	2.4	2.8	2.5:2.6:2.7	BLCA	diagnosis_subtype	"Papillary" vs "Non-Papillary"	0.1395	0.0015	0.00445	0.84
ANKRD49_RI_18350	ANKRD49	ENSG00000168876	chr11 | +	RI	2.2	2.8	2.3:2.4:2.5:2.6:2.7	BLCA	diagnosis_subtype	"Papillary" vs "Non-Papillary"	0.1291	1.91e-05	0.000133	0.9365
ANO1_ES_17387	ANO1	ENSG00000131620	chr11 | +	ES	16	18	17	BLCA	diagnosis_subtype	"Papillary" vs "Non-Papillary"	0.1294	0.023	0.041	0.8541
APOC2_RI_50375	APOC2	ENSG00000234906	chr19 | +	RI	4.3	4.5	4.4	BLCA	diagnosis_subtype	"Papillary" vs "Non-Papillary"	0.241	1.26e-07	3.03e-06	0.9906
ARHGAP22_AP_11481	ARHGAP22	ENSG00000128805	chr10 | -	AP	NA	NA	14.1	BLCA	diagnosis_subtype	"Papillary" vs "Non-Papillary"	0.1302	0.00237	0.00645	0.8
ARHGAP22_AP_11485	ARHGAP22	ENSG00000128805	chr10 | -	AP	NA	NA	3	BLCA	diagnosis_subtype	"Papillary" vs "Non-Papillary"	-0.1518	0.000696	0.00225	0.8
ARHGAP23_AP_40574	ARHGAP23	ENSG00000225485	chr17 | +	AP	NA	NA	1	BLCA	diagnosis_subtype	"Papillary" vs "Non-Papillary"	-0.1272	0.000371	0.00139	0.8071
ARHGAP23_AP_40575	ARHGAP23	ENSG00000225485	chr17 | +	AP	NA	NA	2	BLCA	diagnosis_subtype	"Papillary" vs "Non-Papillary"	0.1272	0.000371	0.00139	0.8071
ARHGEF10L_AP_855	ARHGEF10L	ENSG00000074964	chr1 | +	AP	NA	NA	1	BLCA	diagnosis_subtype	"Papillary" vs "Non-Papillary"	0.1455	6.15e-06	5.53e-05	0.7553
ARHGEF10L_AP_858	ARHGEF10L	ENSG00000074964	chr1 | +	AP	NA	NA	10	BLCA	diagnosis_subtype	"Papillary" vs "Non-Papillary"	-0.16	3.79e-06	3.96e-05	0.7553
ARHGEF39_AP_86268	ARHGEF39	ENSG00000137135	chr9 | -	AP	NA	NA	1	BLCA	diagnosis_subtype	"Papillary" vs "Non-Papillary"	0.1007	2.15e-05	0.000146	1
ARHGEF39_AP_86269	ARHGEF39	ENSG00000137135	chr9 | -	AP	NA	NA	3	BLCA	diagnosis_subtype	"Papillary" vs "Non-Papillary"	-0.1007	2.15e-05	0.000146	1
ARIH2_AP_64784	ARIH2	ENSG00000177479	chr3 | +	AP	NA	NA	1	BLCA	diagnosis_subtype	"Papillary" vs "Non-Papillary"	-0.1106	9.04e-08	2.4e-06	0.9976
ARIH2_AP_64785	ARIH2	ENSG00000177479	chr3 | +	AP	NA	NA	4.1	BLCA	diagnosis_subtype	"Papillary" vs "Non-Papillary"	0.1106	9.04e-08	2.4e-06	0.9976
ARTN_AP_2483	ARTN	ENSG00000117407	chr1 | +	AP	NA	NA	4.1	BLCA	diagnosis_subtype	"Papillary" vs "Non-Papillary"	0.1364	2.17e-06	2.74e-05	0.9247
ARTN_AP_2486	ARTN	ENSG00000117407	chr1 | +	AP	NA	NA	1	BLCA	diagnosis_subtype	"Papillary" vs "Non-Papillary"	-0.1078	1.91e-06	2.51e-05	0.9247
ASPHD1_RI_35986	ASPHD1	ENSG00000174939	chr16 | +	RI	1.1	1.3	1.2	BLCA	diagnosis_subtype	"Papillary" vs "Non-Papillary"	0.1738	0.00164	0.00479	0.9059
ATAD3A_AA_176	ATAD3A	ENSG00000197785	chr1 | +	AA	3	4.2	4.1	BLCA	diagnosis_subtype	"Papillary" vs "Non-Papillary"	0.1026	2.65e-05	0.000172	0.9953
ATG12_ES_73035	ATG12	ENSG00000145782	chr5 | -	ES	1.1	4	1.2:3	BLCA	diagnosis_subtype	"Papillary" vs "Non-Papillary"	0.1441	0.00825	0.018	0.8071
ATMIN_AP_37748	ATMIN	ENSG00000166454	chr16 | +	AP	NA	NA	1	BLCA	diagnosis_subtype	"Papillary" vs "Non-Papillary"	-0.1198	1.74e-07	3.67e-06	0.9624
ATP2C1_AP_66756	ATP2C1	ENSG00000017260	chr3 | +	AP	NA	NA	1	BLCA	diagnosis_subtype	"Papillary" vs "Non-Papillary"	-0.1218	5.33e-06	5.02e-05	0.8847
ATP2C1_AP_66758	ATP2C1	ENSG00000017260	chr3 | +	AP	NA	NA	2	BLCA	diagnosis_subtype	"Papillary" vs "Non-Papillary"	0.1035	0.00334	0.00852	0.8847
ATP5G3_RI_56093	ATP5G3	ENSG00000154518	chr2 | -	RI	1.1	1.3	1.2	BLCA	diagnosis_subtype	"Papillary" vs "Non-Papillary"	0.1004	0.000103	0.000497	0.9553
BCAR3_AP_3793	BCAR3	ENSG00000137936	chr1 | -	AP	NA	NA	11	BLCA	diagnosis_subtype	"Papillary" vs "Non-Papillary"	0.1644	0.000419	0.00152	0.8941
BCAR3_AP_3796	BCAR3	ENSG00000137936	chr1 | -	AP	NA	NA	4	BLCA	diagnosis_subtype	"Papillary" vs "Non-Papillary"	-0.1104	0.00139	0.00416	0.8941
BCS1L_AD_57544	BCS1L	ENSG00000074582	chr2 | +	AD	1.1	2	1.2:1.3:1.4:1.5:1.6:1.7:1.8	BLCA	diagnosis_subtype	"Papillary" vs "Non-Papillary"	0.1004	5.66e-05	0.000306	0.9765
BCS1L_RI_57528	BCS1L	ENSG00000074582	chr2 | +	RI	1.1	1.4	1.2:1.3	BLCA	diagnosis_subtype	"Papillary" vs "Non-Papillary"	0.1694	2.17e-09	1.52e-07	0.9318
BEST1_RI_16315	BEST1	ENSG00000167995	chr11 | +	RI	11.1	11.3	11.2	BLCA	diagnosis_subtype	"Papillary" vs "Non-Papillary"	0.1293	0.028	0.05	0.9271
BEST3_AT_23332	BEST3	ENSG00000127325	chr12 | -	AT	NA	NA	6	BLCA	diagnosis_subtype	"Papillary" vs "Non-Papillary"	0.1001	0.000523	0.0018	0.7506
BTN2A1_ES_75671	BTN2A1	ENSG00000112763	chr6 | +	ES	3	5	4	BLCA	diagnosis_subtype	"Papillary" vs "Non-Papillary"	0.117	4.13e-05	0.000239	0.96
C14orf2_ES_29531	C14orf2	ENSG00000156411	chr14 | -	ES	2	7.1	05:06:00	BLCA	diagnosis_subtype	"Papillary" vs "Non-Papillary"	-0.1156	0.000924	0.00287	0.9529
C16orf13_ES_265882	C16orf13	ENSG00000130731	chr16 | -	ES	1	5	4	BLCA	diagnosis_subtype	"Papillary" vs "Non-Papillary"	0.1433	7.42e-06	6.37e-05	0.8635
C17orf62_ES_44358	C17orf62	ENSG00000178927	chr17 | -	ES	1.1	7.1	2:4.2:4.3:5.2:6	BLCA	diagnosis_subtype	"Papillary" vs "Non-Papillary"	0.1243	0.00256	0.00686	0.7859
C1orf63_ES_1145	C1orf63	ENSG00000117616	chr1 | -	ES	4.2	6.2	5.1:5.2:6.1	BLCA	diagnosis_subtype	"Papillary" vs "Non-Papillary"	0.1718	6.88e-05	0.000357	0.9953
C1orf63_ES_1147	C1orf63	ENSG00000117616	chr1 | -	ES	4.2	6.2	5.1:5.2:5.3	BLCA	diagnosis_subtype	"Papillary" vs "Non-Papillary"	0.1268	4.34e-06	4.36e-05	0.9906
C1QTNF1_AP_43983	C1QTNF1	ENSG00000173918	chr17 | +	AP	NA	NA	5	BLCA	diagnosis_subtype	"Papillary" vs "Non-Papillary"	0.1036	0.00699	0.016	0.9788
C7orf43_AP_80904	C7orf43	ENSG00000146826	chr7 | -	AP	NA	NA	1	BLCA	diagnosis_subtype	"Papillary" vs "Non-Papillary"	-0.1014	4.88e-06	4.72e-05	0.9953
C7orf43_AP_80905	C7orf43	ENSG00000146826	chr7 | -	AP	NA	NA	2.1	BLCA	diagnosis_subtype	"Papillary" vs "Non-Papillary"	0.1014	4.88e-06	4.72e-05	0.9953
CC2D2A_ES_68809	CC2D2A	ENSG00000048342	chr4 | +	ES	4	6	5	BLCA	diagnosis_subtype	"Papillary" vs "Non-Papillary"	-0.1296	0.00011	0.000525	0.8776
CCDC14_AP_66486	CCDC14	ENSG00000175455	chr3 | -	AP	NA	NA	1	BLCA	diagnosis_subtype	"Papillary" vs "Non-Papillary"	-0.1076	2.97e-05	0.000188	0.9271
CCDC14_AP_66487	CCDC14	ENSG00000175455	chr3 | -	AP	NA	NA	2.1	BLCA	diagnosis_subtype	"Papillary" vs "Non-Papillary"	0.1152	4.11e-05	0.000239	0.9271
CCDC14_RI_66497	CCDC14	ENSG00000175455	chr3 | -	RI	2.4	2.6	2.5	BLCA	diagnosis_subtype	"Papillary" vs "Non-Papillary"	0.1144	4.58e-05	0.000261	0.8471
CCDC14_RI_66498	CCDC14	ENSG00000175455	chr3 | -	RI	2.2	2.4	2.3	BLCA	diagnosis_subtype	"Papillary" vs "Non-Papillary"	0.1197	3.56e-05	0.000218	0.8682
CCDC50_ES_68126	CCDC50	ENSG00000152492	chr3 | +	ES	5	7	6	BLCA	diagnosis_subtype	"Papillary" vs "Non-Papillary"	0.1412	3.8e-07	7.15e-06	0.9976
CCDC7_AT_11162	CCDC7	ENSG00000216937	chr10 | +	AT	NA	NA	19	BLCA	diagnosis_subtype	"Papillary" vs "Non-Papillary"	0.1654	0.011	0.023	1
CCDC7_AT_11163	CCDC7	ENSG00000216937	chr10 | +	AT	NA	NA	11	BLCA	diagnosis_subtype	"Papillary" vs "Non-Papillary"	-0.1654	0.014	0.027	1
CD33_AT_51313	CD33	ENSG00000105383	chr19 | +	AT	NA	NA	7	BLCA	diagnosis_subtype	"Papillary" vs "Non-Papillary"	-0.1382	6.74e-07	1.05e-05	1
CD33_AT_51314	CD33	ENSG00000105383	chr19 | +	AT	NA	NA	6.3	BLCA	diagnosis_subtype	"Papillary" vs "Non-Papillary"	0.1382	6.74e-07	1.05e-05	1
CD44_ES_15111	CD44	ENSG00000026508	chr11 | +	ES	5	12.1	6:7:8:9.1:9.2:10:11	BLCA	diagnosis_subtype	"Papillary" vs "Non-Papillary"	0.2093	0.000341	0.0013	0.9082
CD44_ES_15114	CD44	ENSG00000026508	chr11 | +	ES	5	12.1	6:7:8:9.2:10:11	BLCA	diagnosis_subtype	"Papillary" vs "Non-Papillary"	0.2026	0.000545	0.00186	0.8753
CD44_ES_15115	CD44	ENSG00000026508	chr11 | +	ES	5	12.1	7:8:9.2:10:11	BLCA	diagnosis_subtype	"Papillary" vs "Non-Papillary"	0.1043	0.00188	0.00532	0.9012
CD44_ES_15127	CD44	ENSG00000026508	chr11 | +	ES	5	15	6:7:8:9.1:9.2:10:11:12.1:13:14	BLCA	diagnosis_subtype	"Papillary" vs "Non-Papillary"	0.2124	0.000454	0.00161	0.9859
CD44_ES_15128	CD44	ENSG00000026508	chr11 | +	ES	5	15	7:8:9.1:9.2:10:11:12.1:13:14	BLCA	diagnosis_subtype	"Papillary" vs "Non-Papillary"	0.1376	0.00181	0.00515	0.9906
CD44_ES_15130	CD44	ENSG00000026508	chr11 | +	ES	5	15	6:7:8:9.2:10:11:12.1:13:14	BLCA	diagnosis_subtype	"Papillary" vs "Non-Papillary"	0.1701	0.000859	0.00269	0.9812
CD44_ES_15131	CD44	ENSG00000026508	chr11 | +	ES	5	15	7:8:9.2:10:11:12.1:13:14	BLCA	diagnosis_subtype	"Papillary" vs "Non-Papillary"	0.1527	0.00264	0.00704	0.9835
CD44_ES_15133	CD44	ENSG00000026508	chr11 | +	ES	5	15	10:11:12.1:13:14	BLCA	diagnosis_subtype	"Papillary" vs "Non-Papillary"	0.1678	0.000201	0.000859	0.76
CD47_ES_66013	CD47	ENSG00000196776	chr3 | -	ES	8	11	09:10:00	BLCA	diagnosis_subtype	"Papillary" vs "Non-Papillary"	0.1148	3.81e-07	7.15e-06	1
CENPI_AP_89628	CENPI	ENSG00000102384	chrX | +	AP	NA	NA	1	BLCA	diagnosis_subtype	"Papillary" vs "Non-Papillary"	-0.1241	0.000416	0.00151	0.9694
CENPI_AP_89629	CENPI	ENSG00000102384	chrX | +	AP	NA	NA	3	BLCA	diagnosis_subtype	"Papillary" vs "Non-Papillary"	0.1241	0.000416	0.00151	0.9694
CENPP_AP_86872	CENPP	ENSG00000188312	chr9 | +	AP	NA	NA	1	BLCA	diagnosis_subtype	"Papillary" vs "Non-Papillary"	-0.1144	0.00045	0.0016	0.9859
CERCAM_RI_87747	CERCAM	ENSG00000167123	chr9 | +	RI	3.1	3.3	3.2	BLCA	diagnosis_subtype	"Papillary" vs "Non-Papillary"	0.1643	1.81e-10	2.31e-08	1
CLCN6_ES_689	CLCN6	ENSG00000011021	chr1 | +	ES	12	14	13	BLCA	diagnosis_subtype	"Papillary" vs "Non-Papillary"	-0.1138	2.58e-05	0.000169	0.76
CLSPN_AT_1730	CLSPN	ENSG00000092853	chr1 | -	AT	NA	NA	25	BLCA	diagnosis_subtype	"Papillary" vs "Non-Papillary"	-0.1024	0.000171	0.000756	1
CLSPN_AT_1731	CLSPN	ENSG00000092853	chr1 | -	AT	NA	NA	26	BLCA	diagnosis_subtype	"Papillary" vs "Non-Papillary"	0.1024	0.000171	0.000756	1
CNEP1R1_AP_36356	CNEP1R1	ENSG00000205423	chr16 | +	AP	NA	NA	1	BLCA	diagnosis_subtype	"Papillary" vs "Non-Papillary"	-0.1038	0.00426	0.011	0.8094
CNEP1R1_AP_36357	CNEP1R1	ENSG00000205423	chr16 | +	AP	NA	NA	2.1	BLCA	diagnosis_subtype	"Papillary" vs "Non-Papillary"	0.1038	0.00426	0.011	0.8094
COL4A6_AP_89855	COL4A6	ENSG00000197565	chrX | -	AP	NA	NA	2	BLCA	diagnosis_subtype	"Papillary" vs "Non-Papillary"	-0.164	1.12e-05	8.86e-05	0.7506
COL4A6_AP_89856	COL4A6	ENSG00000197565	chrX | -	AP	NA	NA	50.1	BLCA	diagnosis_subtype	"Papillary" vs "Non-Papillary"	0.1494	1.91e-05	0.000133	0.7506
COPE_ES_48519	COPE	ENSG00000105669	chr19 | -	ES	3	6	04:05:00	BLCA	diagnosis_subtype	"Papillary" vs "Non-Papillary"	0.1466	2.12e-08	7.23e-07	0.9835
COPS7A_ES_19944	COPS7A	ENSG00000111652	chr12 | +	ES	2.4	7	05:06:00	BLCA	diagnosis_subtype	"Papillary" vs "Non-Papillary"	0.1478	0.012	0.024	0.8024
CORO1B_ES_387271	CORO1B	ENSG00000172725	chr11 | -	ES	3	7	4:5.1:5.3:5.5:5.6:5.7:6	BLCA	diagnosis_subtype	"Papillary" vs "Non-Papillary"	0.1015	0.000213	0.000896	0.84
CPSF6_ES_23310	CPSF6	ENSG00000111605	chr12 | +	ES	2.1	11.2	2.2:3:4:5:6.1:6.2:8.1:8.2:9:10:11.1	BLCA	diagnosis_subtype	"Papillary" vs "Non-Papillary"	0.2529	0.018	0.034	0.8776
CREM_AP_11230	CREM	ENSG00000095794	chr10 | +	AP	NA	NA	12	BLCA	diagnosis_subtype	"Papillary" vs "Non-Papillary"	-0.1028	0.000647	0.00211	0.9953
CSF2RA_ES_88369	CSF2RA	ENSG00000198223	chrX | +	ES	12	14	13	BLCA	diagnosis_subtype	"Papillary" vs "Non-Papillary"	0.187	1.12e-07	2.76e-06	1
CSMD2_AT_1687	CSMD2	ENSG00000121904	chr1 | -	AT	NA	NA	50	BLCA	diagnosis_subtype	"Papillary" vs "Non-Papillary"	0.1564	3.37e-08	1.08e-06	1
CTTN_ES_92712	CTTN	ENSG00000085733	chr11 | +	ES	9	13	10:12:00	BLCA	diagnosis_subtype	"Papillary" vs "Non-Papillary"	0.1002	0.00162	0.00476	0.7671
CWC25_AD_40597	CWC25	ENSG00000108296	chr17 | -	AD	6.1	7	6.2	BLCA	diagnosis_subtype	"Papillary" vs "Non-Papillary"	0.109	3.95e-05	0.000233	0.9953
CXCL12_AT_11342	CXCL12	ENSG00000107562	chr10 | -	AT	NA	NA	5.2	BLCA	diagnosis_subtype	"Papillary" vs "Non-Papillary"	0.1231	0.000872	0.00273	1
CXCL12_AT_11343	CXCL12	ENSG00000107562	chr10 | -	AT	NA	NA	3.3	BLCA	diagnosis_subtype	"Papillary" vs "Non-Papillary"	-0.169	0.00233	0.00638	1
CYB561A3_AA_16164	CYB561A3	ENSG00000162144	chr11 | -	AA	6.4	6.7	6.6	BLCA	diagnosis_subtype	"Papillary" vs "Non-Papillary"	-0.1018	1.61e-07	3.49e-06	1
CYP46A1_AT_29229	CYP46A1	ENSG00000036530	chr14 | +	AT	NA	NA	17	BLCA	diagnosis_subtype	"Papillary" vs "Non-Papillary"	-0.1084	0.00468	0.011	0.9976
CYP46A1_AT_29230	CYP46A1	ENSG00000036530	chr14 | +	AT	NA	NA	9.2	BLCA	diagnosis_subtype	"Papillary" vs "Non-Papillary"	0.1084	0.00468	0.011	0.9976
DACT3_AT_50576	DACT3	ENSG00000197380	chr19 | -	AT	NA	NA	4.2	BLCA	diagnosis_subtype	"Papillary" vs "Non-Papillary"	0.2405	4.3e-09	2.2e-07	1
DACT3_AT_50577	DACT3	ENSG00000197380	chr19 | -	AT	NA	NA	5	BLCA	diagnosis_subtype	"Papillary" vs "Non-Papillary"	-0.2405	4.3e-09	2.2e-07	1
DCTN3_AA_86187	DCTN3	ENSG00000137100	chr9 | -	AA	3.1	3.5	3.3:3.4	BLCA	diagnosis_subtype	"Papillary" vs "Non-Papillary"	0.1072	0.00217	0.00601	0.9953
DCTN3_AD_86188	DCTN3	ENSG00000137100	chr9 | -	AD	3.1	3.5	3.2:3.3	BLCA	diagnosis_subtype	"Papillary" vs "Non-Papillary"	0.1912	0.00921	0.02	0.96
DCUN1D4_AD_69271	DCUN1D4	ENSG00000109184	chr4 | +	AD	9.1	10	9.2:9.3	BLCA	diagnosis_subtype	"Papillary" vs "Non-Papillary"	0.1216	3.88e-08	1.2e-06	0.96
DDAH1_AP_3656	DDAH1	ENSG00000153904	chr1 | -	AP	NA	NA	3	BLCA	diagnosis_subtype	"Papillary" vs "Non-Papillary"	0.1494	1.41e-07	3.19e-06	0.9035
DDAH1_AP_3657	DDAH1	ENSG00000153904	chr1 | -	AP	NA	NA	1	BLCA	diagnosis_subtype	"Papillary" vs "Non-Papillary"	-0.1546	2.95e-08	9.84e-07	0.9035
DENND2D_AP_4141	DENND2D	ENSG00000162777	chr1 | -	AP	NA	NA	2	BLCA	diagnosis_subtype	"Papillary" vs "Non-Papillary"	0.1885	0.000225	0.00092	0.9788
DENND2D_AP_4142	DENND2D	ENSG00000162777	chr1 | -	AP	NA	NA	1	BLCA	diagnosis_subtype	"Papillary" vs "Non-Papillary"	-0.1885	0.000225	0.00092	0.9788
DGKZ_AP_15540	DGKZ	ENSG00000149091	chr11 | +	AP	NA	NA	3	BLCA	diagnosis_subtype	"Papillary" vs "Non-Papillary"	-0.1321	0.00131	0.00394	0.9929
DGKZ_AP_15541	DGKZ	ENSG00000149091	chr11 | +	AP	NA	NA	2	BLCA	diagnosis_subtype	"Papillary" vs "Non-Papillary"	0.1278	0.000237	0.000958	0.9929
DMTF1_ES_80313	DMTF1	ENSG00000135164	chr7 | +	ES	1.1	4.2	1.2:2:3	BLCA	diagnosis_subtype	"Papillary" vs "Non-Papillary"	0.1063	0.00467	0.011	0.9153
DNAJC12_ES_11904	DNAJC12	ENSG00000108176	chr10 | -	ES	1	3	2	BLCA	diagnosis_subtype	"Papillary" vs "Non-Papillary"	0.1368	7.41e-05	0.000383	0.9435
DYM_ES_45472	DYM	ENSG00000141627	chr18 | -	ES	2	6	03:05:00	BLCA	diagnosis_subtype	"Papillary" vs "Non-Papillary"	0.1014	0.00144	0.0043	0.9835
EDEM2_AP_59063	EDEM2	ENSG00000088298	chr20 | -	AP	NA	NA	6	BLCA	diagnosis_subtype	"Papillary" vs "Non-Papillary"	-0.1172	4.14e-05	0.000239	1
EDEM2_AP_59064	EDEM2	ENSG00000088298	chr20 | -	AP	NA	NA	1	BLCA	diagnosis_subtype	"Papillary" vs "Non-Papillary"	0.1268	4.44e-05	0.000253	1
EFHC1_RI_76472	EFHC1	ENSG00000096093	chr6 | +	RI	5.1	5.3	5.2	BLCA	diagnosis_subtype	"Papillary" vs "Non-Papillary"	0.1416	5.15e-05	0.000287	0.9906
EIF5_AP_29441	EIF5	ENSG00000100664	chr14 | +	AP	NA	NA	3.1	BLCA	diagnosis_subtype	"Papillary" vs "Non-Papillary"	0.1416	9.81e-07	1.38e-05	0.8635
EIF5_AP_29442	EIF5	ENSG00000100664	chr14 | +	AP	NA	NA	1	BLCA	diagnosis_subtype	"Papillary" vs "Non-Papillary"	-0.1416	9.81e-07	1.38e-05	0.8635
ELMOD3_AA_54247	ELMOD3	ENSG00000115459	chr2 | +	AA	1	2.3	2.1:2.2	BLCA	diagnosis_subtype	"Papillary" vs "Non-Papillary"	0.143	1.33e-05	9.91e-05	0.7765
ELMOD3_AA_54249	ELMOD3	ENSG00000115459	chr2 | +	AA	1	2.9	2.1:2.2:2.3:2.4:2.5:2.6:2.7:2.8	BLCA	diagnosis_subtype	"Papillary" vs "Non-Papillary"	0.2229	0.00108	0.00327	0.8024
ELMOD3_AA_54251	ELMOD3	ENSG00000115459	chr2 | +	AA	1	2.9	2.3:2.4:2.5:2.6:2.7:2.8	BLCA	diagnosis_subtype	"Papillary" vs "Non-Papillary"	0.1655	0.00553	0.013	0.8824
ELMOD3_RI_54232	ELMOD3	ENSG00000115459	chr2 | +	RI	2.1	2.9	2.2:2.3:2.4:2.5:2.6:2.7:2.8	BLCA	diagnosis_subtype	"Papillary" vs "Non-Papillary"	0.1276	0.021	0.039	0.8212
ELP5_AT_38887	ELP5	ENSG00000170291	chr17 | +	AT	NA	NA	5.2	BLCA	diagnosis_subtype	"Papillary" vs "Non-Papillary"	0.2566	0.00591	0.014	1
ELP5_AT_38888	ELP5	ENSG00000170291	chr17 | +	AT	NA	NA	7.5	BLCA	diagnosis_subtype	"Papillary" vs "Non-Papillary"	-0.2566	0.00591	0.014	1
EMC10_ES_51201	EMC10	ENSG00000161671	chr19 | +	ES	6	8.1	7	BLCA	diagnosis_subtype	"Papillary" vs "Non-Papillary"	0.1348	1.05e-10	1.61e-08	0.9976
EMP1_AA_20538	EMP1	ENSG00000134531	chr12 | +	AA	3	4.5	4.1:4.2:4.3:4.4	BLCA	diagnosis_subtype	"Papillary" vs "Non-Papillary"	0.1542	0.00326	0.00835	0.8729
EMR2_AT_48028	EMR2	ENSG00000127507	chr19 | -	AT	NA	NA	21	BLCA	diagnosis_subtype	"Papillary" vs "Non-Papillary"	0.1397	3.73e-07	7.15e-06	1
EMR2_AT_48029	EMR2	ENSG00000127507	chr19 | -	AT	NA	NA	22	BLCA	diagnosis_subtype	"Papillary" vs "Non-Papillary"	-0.1397	3.28e-07	6.46e-06	1
ENTHD2_AD_44112	ENTHD2	ENSG00000167302	chr17 | -	AD	1.1	2	1.2	BLCA	diagnosis_subtype	"Papillary" vs "Non-Papillary"	0.1084	7.18e-07	1.1e-05	0.9835
ERBB2IP_ES_72263	ERBB2IP	ENSG00000112851	chr5 | +	ES	21	25	22:24.1:24.2:24.3	BLCA	diagnosis_subtype	"Papillary" vs "Non-Papillary"	0.1536	5.88e-05	0.000315	0.8141
ERGIC1_RI_74563	ERGIC1	ENSG00000113719	chr5 | +	RI	6.1	6.3	6.2	BLCA	diagnosis_subtype	"Papillary" vs "Non-Papillary"	0.2238	0.017	0.032	0.8
ETV4_AP_41710	ETV4	ENSG00000175832	chr17 | -	AP	NA	NA	10.1	BLCA	diagnosis_subtype	"Papillary" vs "Non-Papillary"	0.1097	1.43e-05	0.000105	0.8588
EVL_AP_29241	EVL	ENSG00000196405	chr14 | +	AP	NA	NA	3	BLCA	diagnosis_subtype	"Papillary" vs "Non-Papillary"	-0.1485	0.018	0.034	0.9482
EXOC1_ES_69335	EXOC1	ENSG00000090989	chr4 | +	ES	10	12	11	BLCA	diagnosis_subtype	"Papillary" vs "Non-Papillary"	0.1202	7e-09	2.97e-07	0.9741
EXOC7_AA_43567	EXOC7	ENSG00000182473	chr17 | -	AA	7	8.2	8.1	BLCA	diagnosis_subtype	"Papillary" vs "Non-Papillary"	0.1319	3.84e-05	0.00023	0.8729
EXOC7_ES_43565	EXOC7	ENSG00000182473	chr17 | -	ES	7	9	8.1:8.2	BLCA	diagnosis_subtype	"Papillary" vs "Non-Papillary"	0.1109	5.49e-07	9.59e-06	0.9035
FAM110A_AP_58466	FAM110A	ENSG00000125898	chr20 | +	AP	NA	NA	4.1	BLCA	diagnosis_subtype	"Papillary" vs "Non-Papillary"	0.1185	9.69e-06	7.88e-05	0.9953
FAM110A_AP_58467	FAM110A	ENSG00000125898	chr20 | +	AP	NA	NA	1	BLCA	diagnosis_subtype	"Papillary" vs "Non-Papillary"	-0.1206	3.91e-06	4.04e-05	0.9953
FAM111A_AA_16027	FAM111A	ENSG00000166801	chr11 | +	AA	2	3.3	3.1:3.2	BLCA	diagnosis_subtype	"Papillary" vs "Non-Papillary"	0.1597	0.002	0.00563	0.9106
FAM195B_AA_44174	FAM195B	ENSG00000225663	chr17 | -	AA	3.3	4.3	4.1:4.2	BLCA	diagnosis_subtype	"Papillary" vs "Non-Papillary"	0.1054	0.000217	0.000907	0.8259
FAM65A_AP_37081	FAM65A	ENSG00000039523	chr16 | +	AP	NA	NA	3	BLCA	diagnosis_subtype	"Papillary" vs "Non-Papillary"	0.1314	0.000255	0.00103	0.7976
FAM65A_AP_37083	FAM65A	ENSG00000039523	chr16 | +	AP	NA	NA	1	BLCA	diagnosis_subtype	"Papillary" vs "Non-Papillary"	-0.1309	0.000218	0.000907	0.7976
FAM65B_AT_75542	FAM65B	ENSG00000111913	chr6 | -	AT	NA	NA	28	BLCA	diagnosis_subtype	"Papillary" vs "Non-Papillary"	0.1434	8.66e-07	1.24e-05	1
FAM73B_AD_87818	FAM73B	ENSG00000148343	chr9 | +	AD	15.2	16	15.3	BLCA	diagnosis_subtype	"Papillary" vs "Non-Papillary"	0.1136	5.28e-09	2.62e-07	0.9929
FAM76B_ES_18382	FAM76B	ENSG00000077458	chr11 | -	ES	8	10.1	9	BLCA	diagnosis_subtype	"Papillary" vs "Non-Papillary"	0.103	0.000297	0.00116	0.9176
FANCI_ES_32419	FANCI	ENSG00000140525	chr15 | +	ES	1.1	4	1.2:2:3	BLCA	diagnosis_subtype	"Papillary" vs "Non-Papillary"	0.1837	0.00022	0.000913	0.9176
FBLIM1_AP_769	FBLIM1	ENSG00000162458	chr1 | +	AP	NA	NA	3	BLCA	diagnosis_subtype	"Papillary" vs "Non-Papillary"	-0.2174	1.23e-09	9.48e-08	0.9694
FBLIM1_AP_771	FBLIM1	ENSG00000162458	chr1 | +	AP	NA	NA	1	BLCA	diagnosis_subtype	"Papillary" vs "Non-Papillary"	0.2395	1.3e-09	9.52e-08	0.9694
FCGR2B_ES_8681	FCGR2B	ENSG00000072694	chr1 | +	ES	8	10	9	BLCA	diagnosis_subtype	"Papillary" vs "Non-Papillary"	0.1026	9.53e-05	0.00047	0.7671
FSD1L_AT_87120	FSD1L	ENSG00000106701	chr9 | +	AT	NA	NA	5.2	BLCA	diagnosis_subtype	"Papillary" vs "Non-Papillary"	-0.1216	2.88e-05	0.000184	0.9953
FSD1L_AT_87121	FSD1L	ENSG00000106701	chr9 | +	AT	NA	NA	17	BLCA	diagnosis_subtype	"Papillary" vs "Non-Papillary"	0.153	0.000182	0.000795	0.9953
FXYD3_AP_49023	FXYD3	ENSG00000089356	chr19 | +	AP	NA	NA	1.1	BLCA	diagnosis_subtype	"Papillary" vs "Non-Papillary"	-0.1089	0.00779	0.017	0.9459
GABARAP_AD_38867	GABARAP	ENSG00000170296	chr17 | -	AD	1.1	2.1	1.2:1.3:1.4:1.5	BLCA	diagnosis_subtype	"Papillary" vs "Non-Papillary"	0.1081	5.99e-07	9.73e-06	1
GABARAP_ES_38868	GABARAP	ENSG00000170296	chr17 | -	ES	1.1	2.1	1.2:1.3:1.5	BLCA	diagnosis_subtype	"Papillary" vs "Non-Papillary"	0.1394	6.71e-06	5.93e-05	0.8071
GAREML_AP_52882	GAREML	ENSG00000157833	chr2 | +	AP	NA	NA	1	BLCA	diagnosis_subtype	"Papillary" vs "Non-Papillary"	-0.1022	0.011	0.023	1
GAREML_AP_52883	GAREML	ENSG00000157833	chr2 | +	AP	NA	NA	3	BLCA	diagnosis_subtype	"Papillary" vs "Non-Papillary"	0.1022	0.011	0.023	1
GET4_AP_78551	GET4	ENSG00000239857	chr7 | +	AP	NA	NA	1	BLCA	diagnosis_subtype	"Papillary" vs "Non-Papillary"	-0.1031	3.59e-06	3.84e-05	1
GET4_AP_78552	GET4	ENSG00000239857	chr7 | +	AP	NA	NA	2.1	BLCA	diagnosis_subtype	"Papillary" vs "Non-Papillary"	0.1031	3.59e-06	3.84e-05	1
GNB2_AP_80982	GNB2	ENSG00000172354	chr7 | +	AP	NA	NA	1	BLCA	diagnosis_subtype	"Papillary" vs "Non-Papillary"	-0.1204	8.55e-06	7.22e-05	0.8965
GNPDA1_RI_73862	GNPDA1	ENSG00000113552	chr5 | -	RI	2.4	2.6	2.5	BLCA	diagnosis_subtype	"Papillary" vs "Non-Papillary"	0.1364	4.16e-05	0.00024	0.7718
GPR110_AT_76436	GPR110	ENSG00000153292	chr6 | -	AT	NA	NA	17	BLCA	diagnosis_subtype	"Papillary" vs "Non-Papillary"	0.1454	7.75e-07	1.16e-05	0.9718
GPR110_AT_76437	GPR110	ENSG00000153292	chr6 | -	AT	NA	NA	8	BLCA	diagnosis_subtype	"Papillary" vs "Non-Papillary"	-0.1454	7.75e-07	1.16e-05	0.9718
GPS1_RI_44275	GPS1	ENSG00000169727	chr17 | +	RI	1.1	1.3	1.2	BLCA	diagnosis_subtype	"Papillary" vs "Non-Papillary"	0.1009	1.29e-05	9.63e-05	0.8965
GPS1_RI_44276	GPS1	ENSG00000169727	chr17 | +	RI	1.1	1.4	1.2:1.3	BLCA	diagnosis_subtype	"Papillary" vs "Non-Papillary"	0.1119	0.012	0.024	0.8494
GPS1_RI_44278	GPS1	ENSG00000169727	chr17 | +	RI	1.1	1.5	1.2:1.3:1.4	BLCA	diagnosis_subtype	"Papillary" vs "Non-Papillary"	0.1109	0.000137	0.000626	0.9765
GULP1_AT_56499	GULP1	ENSG00000144366	chr2 | +	AT	NA	NA	9.2	BLCA	diagnosis_subtype	"Papillary" vs "Non-Papillary"	0.1152	8.88e-06	7.38e-05	1
GULP1_AT_56500	GULP1	ENSG00000144366	chr2 | +	AT	NA	NA	15	BLCA	diagnosis_subtype	"Papillary" vs "Non-Papillary"	-0.1152	8.88e-06	7.38e-05	1
HMGA2_AT_22880	HMGA2	ENSG00000149948	chr12 | +	AT	NA	NA	10	BLCA	diagnosis_subtype	"Papillary" vs "Non-Papillary"	-0.2797	3.56e-06	3.84e-05	0.9953
HMGA2_AT_22881	HMGA2	ENSG00000149948	chr12 | +	AT	NA	NA	9.3	BLCA	diagnosis_subtype	"Papillary" vs "Non-Papillary"	0.2746	6.9e-09	2.97e-07	0.9953
HNRNPA2B1_ES_79037	HNRNPA2B1	ENSG00000122566	chr7 | -	ES	11	12.4	12.2	BLCA	diagnosis_subtype	"Papillary" vs "Non-Papillary"	0.1074	1.41e-05	0.000104	0.9953
HNRNPF_AP_11325	HNRNPF	ENSG00000169813	chr10 | -	AP	NA	NA	3	BLCA	diagnosis_subtype	"Papillary" vs "Non-Papillary"	-0.1015	6.53e-11	1.26e-08	0.9976
HNRNPF_AP_11326	HNRNPF	ENSG00000169813	chr10 | -	AP	NA	NA	5.1	BLCA	diagnosis_subtype	"Papillary" vs "Non-Papillary"	0.1402	5.3e-13	4.08e-10	0.9976
HOMER3_AP_48535	HOMER3	ENSG00000051128	chr19 | -	AP	NA	NA	1	BLCA	diagnosis_subtype	"Papillary" vs "Non-Papillary"	-0.1055	5.96e-06	5.39e-05	1
HPS4_RI_61503	HPS4	ENSG00000100099	chr22 | -	RI	10.1	10.3	10.2	BLCA	diagnosis_subtype	"Papillary" vs "Non-Papillary"	0.1279	0.00105	0.00319	0.84
HPS4_RI_61504	HPS4	ENSG00000100099	chr22 | -	RI	10.1	10.5	10.2:10.3:10.4	BLCA	diagnosis_subtype	"Papillary" vs "Non-Papillary"	0.1254	1.49e-05	0.000109	0.9506
ICAM3_RI_47503	ICAM3	ENSG00000076662	chr19 | -	RI	3.1	3.3	3.2	BLCA	diagnosis_subtype	"Papillary" vs "Non-Papillary"	0.1912	2.29e-05	0.000153	1
IGFLR1_AP_49256	IGFLR1	ENSG00000126246	chr19 | -	AP	NA	NA	2.1	BLCA	diagnosis_subtype	"Papillary" vs "Non-Papillary"	0.1376	0.000459	0.00163	0.7859
IGFLR1_AP_49257	IGFLR1	ENSG00000126246	chr19 | -	AP	NA	NA	1.1	BLCA	diagnosis_subtype	"Papillary" vs "Non-Papillary"	-0.1376	0.000459	0.00163	0.7859
IL11RA_AP_86208	IL11RA	ENSG00000137070	chr9 | +	AP	NA	NA	2	BLCA	diagnosis_subtype	"Papillary" vs "Non-Papillary"	-0.121	0.00575	0.013	0.9624
IL18BP_RI_17481	IL18BP	ENSG00000137496	chr11 | +	RI	1.6	1.8	1.7	BLCA	diagnosis_subtype	"Papillary" vs "Non-Papillary"	0.1382	5.27e-05	0.000292	0.9718
IL18BP_RI_17496	IL18BP	ENSG00000137496	chr11 | +	RI	1.1	1.8	1.2:1.3:1.4:1.5:1.6:1.7	BLCA	diagnosis_subtype	"Papillary" vs "Non-Papillary"	0.1704	0.000666	0.00216	0.8471
IL1R1_AP_54771	IL1R1	ENSG00000115594	chr2 | +	AP	NA	NA	3	BLCA	diagnosis_subtype	"Papillary" vs "Non-Papillary"	0.1435	1.24e-05	9.31e-05	0.8047
IL1R1_AP_54773	IL1R1	ENSG00000115594	chr2 | +	AP	NA	NA	2	BLCA	diagnosis_subtype	"Papillary" vs "Non-Papillary"	-0.1489	9.35e-06	7.69e-05	0.8047
IL20RB_AP_66943	IL20RB	ENSG00000174564	chr3 | +	AP	NA	NA	2	BLCA	diagnosis_subtype	"Papillary" vs "Non-Papillary"	0.1642	9e-05	0.000445	0.8329
IL20RB_AP_66944	IL20RB	ENSG00000174564	chr3 | +	AP	NA	NA	1	BLCA	diagnosis_subtype	"Papillary" vs "Non-Papillary"	-0.1642	9e-05	0.000445	0.8329
ING3_RI_81588	ING3	ENSG00000071243	chr7 | +	RI	4.1	4.3	4.2	BLCA	diagnosis_subtype	"Papillary" vs "Non-Papillary"	0.1116	8.69e-06	7.3e-05	0.9576
INO80E_ES_36010	INO80E	ENSG00000169592	chr16 | +	ES	5	11	6.2:6.3:7:8:9:10	BLCA	diagnosis_subtype	"Papillary" vs "Non-Papillary"	0.1532	3.1e-05	0.000194	0.9741
INO80E_ES_36012	INO80E	ENSG00000169592	chr16 | +	ES	5	11	6.1:6.2:6.3:10	BLCA	diagnosis_subtype	"Papillary" vs "Non-Papillary"	0.108	3.25e-08	1.06e-06	0.9882
INO80E_ES_36013	INO80E	ENSG00000169592	chr16 | +	ES	5	11	6.2:6.3:10	BLCA	diagnosis_subtype	"Papillary" vs "Non-Papillary"	0.1338	5.68e-07	9.71e-06	0.9929
INO80E_ES_36015	INO80E	ENSG00000169592	chr16 | +	ES	5	11	6.1:6.2:6.3	BLCA	diagnosis_subtype	"Papillary" vs "Non-Papillary"	0.1086	3.91e-08	1.2e-06	0.9953
IP6K2_RI_64745	IP6K2	ENSG00000068745	chr3 | -	RI	11.5	11.9	11.6:11.7:11.8	BLCA	diagnosis_subtype	"Papillary" vs "Non-Papillary"	0.1085	6.77e-05	0.000354	0.9906
IP6K2_RI_64753	IP6K2	ENSG00000068745	chr3 | -	RI	11.2	11.9	11.3:11.4:11.5:11.6:11.7:11.8	BLCA	diagnosis_subtype	"Papillary" vs "Non-Papillary"	0.1004	0.000214	0.000899	1
IRF3_AD_51023	IRF3	ENSG00000126456	chr19 | -	AD	1.1	2	1.2:1.3:1.4:1.5	BLCA	diagnosis_subtype	"Papillary" vs "Non-Papillary"	0.2076	9.74e-05	0.000476	0.8965
IRF3_ES_51008	IRF3	ENSG00000126456	chr19 | -	ES	1.1	3	1.2:1.3:1.4:1.5:2	BLCA	diagnosis_subtype	"Papillary" vs "Non-Papillary"	0.204	0.000611	0.00205	0.9271
IRF3_RI_51030	IRF3	ENSG00000126456	chr19 | -	RI	1.1	1.5	1.2:1.3:1.4	BLCA	diagnosis_subtype	"Papillary" vs "Non-Papillary"	0.1956	1.19e-05	9.27e-05	0.9153
IRF3_RI_51033	IRF3	ENSG00000126456	chr19 | -	RI	1.1	1.4	1.2:1.3	BLCA	diagnosis_subtype	"Papillary" vs "Non-Papillary"	0.1226	1.36e-07	3.16e-06	1
ISOC2_ES_52105	ISOC2	ENSG00000063241	chr19 | -	ES	2	4.2	00:03:04.100000	BLCA	diagnosis_subtype	"Papillary" vs "Non-Papillary"	0.1723	3.85e-09	2.11e-07	0.9953
ITGB3_AT_42067	ITGB3	ENSG00000259207	chr17 | +	AT	NA	NA	15	BLCA	diagnosis_subtype	"Papillary" vs "Non-Papillary"	-0.1201	0.000244	0.000986	0.9835
ITGB3_AT_42068	ITGB3	ENSG00000259207	chr17 | +	AT	NA	NA	19	BLCA	diagnosis_subtype	"Papillary" vs "Non-Papillary"	0.1208	0.0016	0.00471	0.9835
IYD_AT_78139	IYD	ENSG00000009765	chr6 | +	AT	NA	NA	7	BLCA	diagnosis_subtype	"Papillary" vs "Non-Papillary"	0.1089	0.00017	0.000756	1
IYD_AT_78140	IYD	ENSG00000009765	chr6 | +	AT	NA	NA	6.4	BLCA	diagnosis_subtype	"Papillary" vs "Non-Papillary"	-0.1089	0.00017	0.000756	1
KAZN_AT_733	KAZN	ENSG00000189337	chr1 | +	AT	NA	NA	11.2	BLCA	diagnosis_subtype	"Papillary" vs "Non-Papillary"	-0.1126	9.01e-10	7.29e-08	1
KAZN_AT_734	KAZN	ENSG00000189337	chr1 | +	AT	NA	NA	18	BLCA	diagnosis_subtype	"Papillary" vs "Non-Papillary"	0.1126	9.01e-10	7.29e-08	1
KCNN3_AP_7840	KCNN3	ENSG00000143603	chr1 | -	AP	NA	NA	1	BLCA	diagnosis_subtype	"Papillary" vs "Non-Papillary"	0.1499	0.012	0.024	0.8941
KCNN3_AP_7841	KCNN3	ENSG00000143603	chr1 | -	AP	NA	NA	3	BLCA	diagnosis_subtype	"Papillary" vs "Non-Papillary"	-0.1086	0.00994	0.021	0.8941
KIAA1217_ES_11009	KIAA1217	ENSG00000120549	chr10 | +	ES	11	13	12	BLCA	diagnosis_subtype	"Papillary" vs "Non-Papillary"	0.1033	0.00173	0.00497	0.8776
KIFC3_ES_36615	KIFC3	ENSG00000140859	chr16 | -	ES	5	13	7	BLCA	diagnosis_subtype	"Papillary" vs "Non-Papillary"	0.1028	0.00365	0.00919	0.9176
KLHL21_RI_482	KLHL21	ENSG00000162413	chr1 | -	RI	4.1	4.4	4.2:4.3	BLCA	diagnosis_subtype	"Papillary" vs "Non-Papillary"	0.127	2.15e-06	2.74e-05	1
KRT15_RI_40912	KRT15	ENSG00000171346	chr17 | -	RI	7.3	7.5	7.4	BLCA	diagnosis_subtype	"Papillary" vs "Non-Papillary"	0.1155	7.54e-05	0.000388	0.9482
L3MBTL4_AT_44550	L3MBTL4	ENSG00000154655	chr18 | -	AT	NA	NA	19	BLCA	diagnosis_subtype	"Papillary" vs "Non-Papillary"	0.118	0.00681	0.015	1
L3MBTL4_AT_44551	L3MBTL4	ENSG00000154655	chr18 | -	AT	NA	NA	22	BLCA	diagnosis_subtype	"Papillary" vs "Non-Papillary"	-0.118	0.00681	0.015	1
LAMB1_AP_81387	LAMB1	ENSG00000091136	chr7 | -	AP	NA	NA	3.1	BLCA	diagnosis_subtype	"Papillary" vs "Non-Papillary"	0.1435	1.7e-05	0.000121	0.88
LAMB1_AP_81388	LAMB1	ENSG00000091136	chr7 | -	AP	NA	NA	1	BLCA	diagnosis_subtype	"Papillary" vs "Non-Papillary"	-0.1435	1.7e-05	0.000121	0.88
LCLAT1_ES_53117	LCLAT1	ENSG00000172954	chr2 | +	ES	2	4	3	BLCA	diagnosis_subtype	"Papillary" vs "Non-Papillary"	0.1652	0.00101	0.0031	0.7812
LEMD2_AP_75766	LEMD2	ENSG00000161904	chr6 | -	AP	NA	NA	1.1	BLCA	diagnosis_subtype	"Papillary" vs "Non-Papillary"	-0.1047	0.000183	0.000796	0.9906
LEMD2_AP_75767	LEMD2	ENSG00000161904	chr6 | -	AP	NA	NA	2.1	BLCA	diagnosis_subtype	"Papillary" vs "Non-Papillary"	0.1047	0.000183	0.000796	0.9906
LGALS3BP_ES_43932	LGALS3BP	ENSG00000108679	chr17 | -	ES	4.2	6	5.1:5.2:5.3:5.4	BLCA	diagnosis_subtype	"Papillary" vs "Non-Papillary"	0.1106	0.00026	0.00105	0.8729
LIMA1_AP_21688	LIMA1	ENSG00000050405	chr12 | -	AP	NA	NA	4.1	BLCA	diagnosis_subtype	"Papillary" vs "Non-Papillary"	-0.1737	1.21e-05	9.27e-05	1
LIMS1_AP_54883	LIMS1	ENSG00000169756	chr2 | +	AP	NA	NA	5	BLCA	diagnosis_subtype	"Papillary" vs "Non-Papillary"	0.1446	5.69e-07	9.71e-06	0.9765
LIMS1_AP_54885	LIMS1	ENSG00000169756	chr2 | +	AP	NA	NA	1	BLCA	diagnosis_subtype	"Papillary" vs "Non-Papillary"	-0.1272	0.00241	0.00655	0.9765
LIMS2_AP_55227	LIMS2	ENSG00000072163	chr2 | -	AP	NA	NA	2	BLCA	diagnosis_subtype	"Papillary" vs "Non-Papillary"	-0.1277	1.83e-06	2.42e-05	0.76
LIMS3L_AT_54936	LIMS3L	ENSG00000256671	chr2 | -	AT	NA	NA	3	BLCA	diagnosis_subtype	"Papillary" vs "Non-Papillary"	-0.1019	0.000334	0.00128	0.9224
LIMS3L_AT_54938	LIMS3L	ENSG00000256671	chr2 | -	AT	NA	NA	19	BLCA	diagnosis_subtype	"Papillary" vs "Non-Papillary"	0.1019	0.000334	0.00128	0.9224
LMO7_ES_26067	LMO7	ENSG00000136153	chr13 | +	ES	9	13	12	BLCA	diagnosis_subtype	"Papillary" vs "Non-Papillary"	-0.119	0.00308	0.00798	0.7576
LRRC29_AP_36981	LRRC29	ENSG00000125122	chr16 | -	AP	NA	NA	2	BLCA	diagnosis_subtype	"Papillary" vs "Non-Papillary"	-0.1025	0.000665	0.00216	0.8682
LRRFIP2_ES_63960	LRRFIP2	ENSG00000093167	chr3 | -	ES	19	21	20	BLCA	diagnosis_subtype	"Papillary" vs "Non-Papillary"	-0.1301	1.71e-07	3.65e-06	0.9859
LTBP1_AP_53179	LTBP1	ENSG00000049323	chr2 | +	AP	NA	NA	1	BLCA	diagnosis_subtype	"Papillary" vs "Non-Papillary"	0.1852	0.000134	0.000618	0.8753
LTBP1_AP_53180	LTBP1	ENSG00000049323	chr2 | +	AP	NA	NA	5.1	BLCA	diagnosis_subtype	"Papillary" vs "Non-Papillary"	-0.2	8.95e-05	0.000445	0.8753
LTBP3_AP_16862	LTBP3	ENSG00000168056	chr11 | -	AP	NA	NA	1.1	BLCA	diagnosis_subtype	"Papillary" vs "Non-Papillary"	-0.1072	7.67e-05	0.000391	1
LTBR_ES_19852	LTBR	ENSG00000111321	chr12 | +	ES	7	10	00:08:09.100000	BLCA	diagnosis_subtype	"Papillary" vs "Non-Papillary"	0.1001	6.29e-05	0.000332	0.9906
LUC7L_AD_32847	LUC7L	ENSG00000007392	chr16 | -	AD	1.1	2.2	1.2:1.3:1.4	BLCA	diagnosis_subtype	"Papillary" vs "Non-Papillary"	0.2023	2.89e-05	0.000184	0.9859
LUC7L_AP_32836	LUC7L	ENSG00000007392	chr16 | -	AP	NA	NA	1.1	BLCA	diagnosis_subtype	"Papillary" vs "Non-Papillary"	-0.1092	7.14e-06	6.2e-05	1
LUC7L_AP_32837	LUC7L	ENSG00000007392	chr16 | -	AP	NA	NA	2.1	BLCA	diagnosis_subtype	"Papillary" vs "Non-Papillary"	0.1092	7.14e-06	6.2e-05	1
LY75_AT_55707	LY75	ENSG00000054219	chr2 | -	AT	NA	NA	40	BLCA	diagnosis_subtype	"Papillary" vs "Non-Papillary"	-0.1496	6.59e-09	2.97e-07	1
LY75_AT_55708	LY75	ENSG00000054219	chr2 | -	AT	NA	NA	35	BLCA	diagnosis_subtype	"Papillary" vs "Non-Papillary"	0.1496	6.59e-09	2.97e-07	1
LYNX1_AP_85361	LYNX1	ENSG00000180155	chr8 | -	AP	NA	NA	7	BLCA	diagnosis_subtype	"Papillary" vs "Non-Papillary"	-0.259	4.78e-05	0.00027	0.8729
LYNX1_AP_85363	LYNX1	ENSG00000180155	chr8 | -	AP	NA	NA	1	BLCA	diagnosis_subtype	"Papillary" vs "Non-Papillary"	0.13	0.000601	0.00202	0.8729
LYNX1_AT_85365	LYNX1	ENSG00000180155	chr8 | -	AT	NA	NA	6.2	BLCA	diagnosis_subtype	"Papillary" vs "Non-Papillary"	0.155	0.0001	0.000486	1
LYNX1_AT_85366	LYNX1	ENSG00000180155	chr8 | -	AT	NA	NA	9.2	BLCA	diagnosis_subtype	"Papillary" vs "Non-Papillary"	-0.155	0.0001	0.000486	1
MAP1LC3A_AP_59028	MAP1LC3A	ENSG00000101460	chr20 | +	AP	NA	NA	1	BLCA	diagnosis_subtype	"Papillary" vs "Non-Papillary"	0.1198	0.00522	0.012	0.9859
MAP1LC3A_AP_59029	MAP1LC3A	ENSG00000101460	chr20 | +	AP	NA	NA	3	BLCA	diagnosis_subtype	"Papillary" vs "Non-Papillary"	-0.1198	0.00522	0.012	0.9859
MAP4K1_ES_49669	MAP4K1	ENSG00000104814	chr19 | -	ES	30	32	31	BLCA	diagnosis_subtype	"Papillary" vs "Non-Papillary"	0.1036	1.05e-05	8.33e-05	0.9741
MAP7D3_AT_90197	MAP7D3	ENSG00000129680	chrX | -	AT	NA	NA	21	BLCA	diagnosis_subtype	"Papillary" vs "Non-Papillary"	0.1055	1.52e-07	3.33e-06	1
MAP7D3_AT_90198	MAP7D3	ENSG00000129680	chrX | -	AT	NA	NA	20	BLCA	diagnosis_subtype	"Papillary" vs "Non-Papillary"	-0.1055	1.52e-07	3.33e-06	1
MARCH6_AP_71560	2023-03-06	ENSG00000145495	chr5 | +	AP	NA	NA	12.1	BLCA	diagnosis_subtype	"Papillary" vs "Non-Papillary"	0.1374	2.4e-06	2.93e-05	0.9906
MARCH6_AP_71561	2023-03-06	ENSG00000145495	chr5 | +	AP	NA	NA	1	BLCA	diagnosis_subtype	"Papillary" vs "Non-Papillary"	-0.1374	2.4e-06	2.93e-05	0.9906
MAST4_AP_72277	MAST4	ENSG00000069020	chr5 | +	AP	NA	NA	10	BLCA	diagnosis_subtype	"Papillary" vs "Non-Papillary"	0.1234	0.00468	0.011	0.9929
MCC_AP_73004	MCC	ENSG00000171444	chr5 | -	AP	NA	NA	1	BLCA	diagnosis_subtype	"Papillary" vs "Non-Papillary"	0.1542	0.000361	0.00136	0.8776
MCC_AP_73005	MCC	ENSG00000171444	chr5 | -	AP	NA	NA	4	BLCA	diagnosis_subtype	"Papillary" vs "Non-Papillary"	-0.1531	0.000276	0.00109	0.8776
ME3_ES_18199	ME3	ENSG00000151376	chr11 | -	ES	8	11	10	BLCA	diagnosis_subtype	"Papillary" vs "Non-Papillary"	0.1342	1.75e-05	0.000124	0.96
MEIS1_ES_53815	MEIS1	ENSG00000143995	chr2 | +	ES	12.1	12.5	12.3	BLCA	diagnosis_subtype	"Papillary" vs "Non-Papillary"	-0.1104	0.00914	0.019	0.8753
MEIS3_AA_50645	MEIS3	ENSG00000105419	chr19 | -	AA	6	7.2	7.1	BLCA	diagnosis_subtype	"Papillary" vs "Non-Papillary"	-0.1264	1.63e-05	0.000117	0.8918
METTL22_ES_33897	METTL22	ENSG00000067365	chr16 | +	ES	3.4	5	4	BLCA	diagnosis_subtype	"Papillary" vs "Non-Papillary"	-0.1289	2.47e-09	1.52e-07	0.9835
MOK_RI_29377	MOK	ENSG00000080823	chr14 | -	RI	15.1	15.6	15.2:15.3:15.4:15.5	BLCA	diagnosis_subtype	"Papillary" vs "Non-Papillary"	0.1134	0.00344	0.00875	0.9694
MOK_RI_29380	MOK	ENSG00000080823	chr14 | -	RI	15.1	15.5	15.2:15.3:15.4	BLCA	diagnosis_subtype	"Papillary" vs "Non-Papillary"	0.118	2.76e-06	3.29e-05	0.9835
MRPL55_AA_10106	MRPL55	ENSG00000162910	chr1 | -	AA	1.2	2.9	2.2:2.3:2.4:2.5:2.6:2.7:2.8	BLCA	diagnosis_subtype	"Papillary" vs "Non-Papillary"	0.1348	5.41e-06	5.02e-05	0.9976
MRPL55_AA_10129	MRPL55	ENSG00000162910	chr1 | -	AA	1.1	2.9	2.2:2.3:2.4:2.5:2.6:2.7:2.8	BLCA	diagnosis_subtype	"Papillary" vs "Non-Papillary"	0.1166	9.64e-06	7.88e-05	0.9553
MRPL55_ES_10128	MRPL55	ENSG00000162910	chr1 | -	ES	1.1	2.9	1.2:2.2:2.3:2.4:2.5:2.6:2.7:2.8	BLCA	diagnosis_subtype	"Papillary" vs "Non-Papillary"	0.2022	1.53e-05	0.000111	0.9859
MRPL55_RI_10072	MRPL55	ENSG00000162910	chr1 | -	RI	2.6	2.8	2.7	BLCA	diagnosis_subtype	"Papillary" vs "Non-Papillary"	0.119	0.00145	0.00431	0.9765
MTCP1_AP_90670	MTCP1	ENSG00000214827	chrX | -	AP	NA	NA	1	BLCA	diagnosis_subtype	"Papillary" vs "Non-Papillary"	0.4112	5.47e-07	9.59e-06	0.92
MTCP1_AP_90671	MTCP1	ENSG00000214827	chrX | -	AP	NA	NA	2	BLCA	diagnosis_subtype	"Papillary" vs "Non-Papillary"	-0.4112	5.47e-07	9.59e-06	0.92
MTERFD3_RI_24188	MTERFD3	ENSG00000120832	chr12 | -	RI	1.1	1.3	1.2	BLCA	diagnosis_subtype	"Papillary" vs "Non-Papillary"	0.1035	0.000496	0.00172	0.9929
MXRA8_AP_142	MXRA8	ENSG00000162576	chr1 | -	AP	NA	NA	1	BLCA	diagnosis_subtype	"Papillary" vs "Non-Papillary"	0.1509	1.9e-08	6.63e-07	0.9882
MXRA8_AP_143	MXRA8	ENSG00000162576	chr1 | -	AP	NA	NA	2	BLCA	diagnosis_subtype	"Papillary" vs "Non-Papillary"	-0.1509	1.9e-08	6.63e-07	0.9882
MYH11_ES_34188	MYH11	ENSG00000133392	chr16 | -	ES	41	43	42	BLCA	diagnosis_subtype	"Papillary" vs "Non-Papillary"	-0.2058	5.68e-06	5.23e-05	0.8918
MYO1C_AP_38307	MYO1C	ENSG00000197879	chr17 | -	AP	NA	NA	1	BLCA	diagnosis_subtype	"Papillary" vs "Non-Papillary"	0.115	0.000107	0.000514	0.9647
MYO1C_AP_38309	MYO1C	ENSG00000197879	chr17 | -	AP	NA	NA	2	BLCA	diagnosis_subtype	"Papillary" vs "Non-Papillary"	-0.1165	7.05e-09	2.97e-07	0.9647
NAB1_ES_56584	NAB1	ENSG00000138386	chr2 | +	ES	1	4.2	02:03:00	BLCA	diagnosis_subtype	"Papillary" vs "Non-Papillary"	0.1054	0.000643	0.0021	0.8518
NABP1_AA_56613	NABP1	ENSG00000173559	chr2 | +	AA	4	5.2	5.1	BLCA	diagnosis_subtype	"Papillary" vs "Non-Papillary"	0.1204	0.0017	0.0049	0.92
NABP1_ES_56614	NABP1	ENSG00000173559	chr2 | +	ES	3	5.2	00:04:05.100000	BLCA	diagnosis_subtype	"Papillary" vs "Non-Papillary"	0.1206	1.88e-05	0.000132	0.9529
NKIRAS2_ES_40983	NKIRAS2	ENSG00000168256	chr17 | +	ES	5.3	7	5.5:5.6:6	BLCA	diagnosis_subtype	"Papillary" vs "Non-Papillary"	0.111	0.000194	0.000837	0.8941
NKIRAS2_ES_40984	NKIRAS2	ENSG00000168256	chr17 | +	ES	5.3	7	5.6:6	BLCA	diagnosis_subtype	"Papillary" vs "Non-Papillary"	0.106	0.000297	0.00116	0.8894
NLE1_ES_40281	NLE1	ENSG00000073536	chr17 | -	ES	1.3	3.1	2.1:2.2	BLCA	diagnosis_subtype	"Papillary" vs "Non-Papillary"	0.1052	0.014	0.028	0.7741
NR1H3_AP_15692	NR1H3	ENSG00000025434	chr11 | +	AP	NA	NA	1	BLCA	diagnosis_subtype	"Papillary" vs "Non-Papillary"	-0.1095	0.00271	0.00718	0.9341
NRBP2_RI_85507	NRBP2	ENSG00000185189	chr8 | -	RI	5.1	5.3	5.2	BLCA	diagnosis_subtype	"Papillary" vs "Non-Papillary"	0.1383	2.09e-05	0.000143	0.8918
NSMF_AA_88315	NSMF	ENSG00000165802	chr9 | -	AA	9.2	10.3	10.1:10.2	BLCA	diagnosis_subtype	"Papillary" vs "Non-Papillary"	0.1072	0.000921	0.00287	0.7741
NSMF_AP_88307	NSMF	ENSG00000165802	chr9 | -	AP	NA	NA	1	BLCA	diagnosis_subtype	"Papillary" vs "Non-Papillary"	-0.1015	1.22e-05	9.27e-05	0.9435
NXNL2_AT_86786	NXNL2	ENSG00000130045	chr9 | +	AT	NA	NA	4	BLCA	diagnosis_subtype	"Papillary" vs "Non-Papillary"	0.1089	0.00513	0.012	0.9835
NXNL2_AT_86787	NXNL2	ENSG00000130045	chr9 | +	AT	NA	NA	2	BLCA	diagnosis_subtype	"Papillary" vs "Non-Papillary"	-0.1089	0.00513	0.012	0.9835
ORMDL1_RI_56537	ORMDL1	ENSG00000128699	chr2 | -	RI	2.2	2.4	2.3	BLCA	diagnosis_subtype	"Papillary" vs "Non-Papillary"	0.124	1.79e-07	3.72e-06	0.9976
OS9_ES_22702	OS9	ENSG00000135506	chr12 | +	ES	4	9.2	5.1:5.2:5.3:6:7.1:7.2:7.3:7.4:8:9.1	BLCA	diagnosis_subtype	"Papillary" vs "Non-Papillary"	0.1348	0.000323	0.00124	0.9412
P2RY6_AP_17682	P2RY6	ENSG00000171631	chr11 | +	AP	NA	NA	3.1	BLCA	diagnosis_subtype	"Papillary" vs "Non-Papillary"	0.2488	6.12e-10	5.53e-08	0.9341
P2RY6_AP_17683	P2RY6	ENSG00000171631	chr11 | +	AP	NA	NA	1	BLCA	diagnosis_subtype	"Papillary" vs "Non-Papillary"	-0.1606	1.45e-05	0.000106	0.9341
P4HA3_AT_17766	P4HA3	ENSG00000149380	chr11 | -	AT	NA	NA	16	BLCA	diagnosis_subtype	"Papillary" vs "Non-Papillary"	0.2002	2.44e-11	5.35e-09	0.9976
P4HA3_AT_17767	P4HA3	ENSG00000149380	chr11 | -	AT	NA	NA	14.2	BLCA	diagnosis_subtype	"Papillary" vs "Non-Papillary"	-0.2002	2.44e-11	5.35e-09	0.9976
PAK1_AP_17950	PAK1	ENSG00000149269	chr11 | -	AP	NA	NA	2	BLCA	diagnosis_subtype	"Papillary" vs "Non-Papillary"	-0.1966	7.98e-07	1.17e-05	0.9741
PAK1_AP_17951	PAK1	ENSG00000149269	chr11 | -	AP	NA	NA	1	BLCA	diagnosis_subtype	"Papillary" vs "Non-Papillary"	0.1966	7.98e-07	1.17e-05	0.9741
PARPBP_ES_24046	PARPBP	ENSG00000185480	chr12 | +	ES	2	4.1	3	BLCA	diagnosis_subtype	"Papillary" vs "Non-Papillary"	0.134	0.000638	0.0021	0.7506
PCGF3_AA_68406	PCGF3	ENSG00000185619	chr4 | +	AA	5.1	5.4	5.3	BLCA	diagnosis_subtype	"Papillary" vs "Non-Papillary"	0.1162	3.08e-05	0.000193	0.9976
PCSK5_AT_86634	PCSK5	ENSG00000099139	chr9 | +	AT	NA	NA	21	BLCA	diagnosis_subtype	"Papillary" vs "Non-Papillary"	-0.1215	0.000419	0.00152	1
PCYOX1L_AP_74031	PCYOX1L	ENSG00000145882	chr5 | +	AP	NA	NA	1.1	BLCA	diagnosis_subtype	"Papillary" vs "Non-Papillary"	-0.1409	0.000166	0.000744	0.7812
PCYOX1L_AP_74032	PCYOX1L	ENSG00000145882	chr5 | +	AP	NA	NA	2.1	BLCA	diagnosis_subtype	"Papillary" vs "Non-Papillary"	0.1409	0.000166	0.000744	0.7812
PDDC1_ES_13755	PDDC1	ENSG00000177225	chr11 | -	ES	3	5	4.1:4.2	BLCA	diagnosis_subtype	"Papillary" vs "Non-Papillary"	0.1188	0.00807	0.018	0.7694
PFDN5_ES_21997	PFDN5	ENSG00000123349	chr12 | +	ES	1	6.2	2:3:5:6.1	BLCA	diagnosis_subtype	"Papillary" vs "Non-Papillary"	0.1066	0.000206	0.000876	0.7624
PI4KA_AP_61187	PI4KA	ENSG00000241973	chr22 | -	AP	NA	NA	1	BLCA	diagnosis_subtype	"Papillary" vs "Non-Papillary"	-0.1394	0.00399	0.00989	0.8706
PI4KA_AP_61188	PI4KA	ENSG00000241973	chr22 | -	AP	NA	NA	33.1	BLCA	diagnosis_subtype	"Papillary" vs "Non-Papillary"	0.1394	0.00399	0.00989	0.8706
PKD1L2_AT_37760	PKD1L2	ENSG00000166473	chr16 | -	AT	NA	NA	44	BLCA	diagnosis_subtype	"Papillary" vs "Non-Papillary"	-0.1934	0.029	0.05	0.9176
PLA2G10_ES_34100	PLA2G10	ENSG00000069764	chr16 | -	ES	3	5	4	BLCA	diagnosis_subtype	"Papillary" vs "Non-Papillary"	-0.1073	0.00339	0.00862	0.9012
PLA2G6_ES_62205	PLA2G6	ENSG00000184381	chr22 | -	ES	13	15	14	BLCA	diagnosis_subtype	"Papillary" vs "Non-Papillary"	0.1349	5.94e-07	9.73e-06	0.8871
PLEKHG5_AP_465	PLEKHG5	ENSG00000171680	chr1 | -	AP	NA	NA	8	BLCA	diagnosis_subtype	"Papillary" vs "Non-Papillary"	0.1035	0.000171	0.000756	0.7835
PLOD2_ES_67137	PLOD2	ENSG00000152952	chr3 | -	ES	14	16	15	BLCA	diagnosis_subtype	"Papillary" vs "Non-Papillary"	-0.1257	5.3e-05	0.000293	0.9106
PLXNA4_AT_81829	PLXNA4	ENSG00000221866	chr7 | -	AT	NA	NA	36	BLCA	diagnosis_subtype	"Papillary" vs "Non-Papillary"	-0.1803	5.21e-06	4.97e-05	0.9035
PLXNA4_AT_81831	PLXNA4	ENSG00000221866	chr7 | -	AT	NA	NA	7	BLCA	diagnosis_subtype	"Papillary" vs "Non-Papillary"	0.1777	5.42e-06	5.02e-05	0.9035
PODNL1_AP_47947	PODNL1	ENSG00000132000	chr19 | -	AP	NA	NA	2	BLCA	diagnosis_subtype	"Papillary" vs "Non-Papillary"	-0.2138	1.86e-07	3.82e-06	0.8871
PODNL1_AP_47949	PODNL1	ENSG00000132000	chr19 | -	AP	NA	NA	1	BLCA	diagnosis_subtype	"Papillary" vs "Non-Papillary"	0.2214	2.9e-06	3.37e-05	0.8871
POFUT2_ES_60873	POFUT2	ENSG00000186866	chr21 | -	ES	8.1	8.5	8.3	BLCA	diagnosis_subtype	"Papillary" vs "Non-Papillary"	0.1037	0.000369	0.00139	0.9835
POLR2J3_ES_81113	POLR2J3	ENSG00000168255	chr7 | -	ES	4.3	8	06:07:00	BLCA	diagnosis_subtype	"Papillary" vs "Non-Papillary"	0.1038	1.99e-06	2.6e-05	1
PPARG_AP_63414	PPARG	ENSG00000132170	chr3 | +	AP	NA	NA	2	BLCA	diagnosis_subtype	"Papillary" vs "Non-Papillary"	-0.1243	1.01e-08	3.89e-07	0.9059
PPARG_AP_63415	PPARG	ENSG00000132170	chr3 | +	AP	NA	NA	3	BLCA	diagnosis_subtype	"Papillary" vs "Non-Papillary"	0.1069	1.22e-05	9.27e-05	0.9059
PPFIBP2_AP_14200	PPFIBP2	ENSG00000166387	chr11 | +	AP	NA	NA	8	BLCA	diagnosis_subtype	"Papillary" vs "Non-Papillary"	0.2102	1.27e-08	4.76e-07	0.8894
PPFIBP2_AP_14203	PPFIBP2	ENSG00000166387	chr11 | +	AP	NA	NA	1	BLCA	diagnosis_subtype	"Papillary" vs "Non-Papillary"	-0.1178	2.54e-12	1.3e-09	0.8894
PPIL6_ES_77195	PPIL6	ENSG00000185250	chr6 | -	ES	6	9	7	BLCA	diagnosis_subtype	"Papillary" vs "Non-Papillary"	0.118	0.000741	0.00239	0.9082
PPP1R26_AP_88105	PPP1R26	ENSG00000196422	chr9 | +	AP	NA	NA	7.1	BLCA	diagnosis_subtype	"Papillary" vs "Non-Papillary"	0.1059	2.94e-06	3.38e-05	0.8165
PRKAG2_AP_82385	PRKAG2	ENSG00000106617	chr7 | -	AP	NA	NA	1	BLCA	diagnosis_subtype	"Papillary" vs "Non-Papillary"	-0.1618	0.016	0.03	0.8447
PSMC3IP_AD_41077	PSMC3IP	ENSG00000131470	chr17 | -	AD	4.1	5.1	4.2:4.3	BLCA	diagnosis_subtype	"Papillary" vs "Non-Papillary"	0.1239	0.000382	0.00142	0.8588
PSMC5_RI_43009	PSMC5	ENSG00000087191	chr17 | +	RI	2.1	2.3	2.2	BLCA	diagnosis_subtype	"Papillary" vs "Non-Papillary"	0.1386	2.37e-06	2.93e-05	0.9976
PTGER3_AT_3416	PTGER3	ENSG00000050628	chr1 | -	AT	NA	NA	8	BLCA	diagnosis_subtype	"Papillary" vs "Non-Papillary"	0.308	8.09e-11	1.38e-08	1
PTGIR_AT_50569	PTGIR	ENSG00000160013	chr19 | -	AT	NA	NA	4.2	BLCA	diagnosis_subtype	"Papillary" vs "Non-Papillary"	-0.1234	2.99e-05	0.000188	1
PTGIR_AT_50570	PTGIR	ENSG00000160013	chr19 | -	AT	NA	NA	3	BLCA	diagnosis_subtype	"Papillary" vs "Non-Papillary"	0.1234	2.99e-05	0.000188	1
PYHIN1_AT_8389	PYHIN1	ENSG00000163564	chr1 | +	AT	NA	NA	5	BLCA	diagnosis_subtype	"Papillary" vs "Non-Papillary"	0.106	1.22e-05	9.27e-05	1
PYHIN1_AT_8390	PYHIN1	ENSG00000163564	chr1 | +	AT	NA	NA	10	BLCA	diagnosis_subtype	"Papillary" vs "Non-Papillary"	-0.106	1.22e-05	9.27e-05	1
RAD51B_AT_28110	RAD51B	ENSG00000182185	chr14 | +	AT	NA	NA	12	BLCA	diagnosis_subtype	"Papillary" vs "Non-Papillary"	-0.1251	1.6e-06	2.16e-05	0.9976
RASA4_AP_81120	RASA4	ENSG00000105808	chr7 | -	AP	NA	NA	2.1	BLCA	diagnosis_subtype	"Papillary" vs "Non-Papillary"	-0.1005	7.09e-08	2.02e-06	0.9624
RASA4_AP_81121	RASA4	ENSG00000105808	chr7 | -	AP	NA	NA	1.1	BLCA	diagnosis_subtype	"Papillary" vs "Non-Papillary"	0.1005	7.09e-08	2.02e-06	0.9624
RASSF5_AP_9585	RASSF5	ENSG00000136653	chr1 | +	AP	NA	NA	1	BLCA	diagnosis_subtype	"Papillary" vs "Non-Papillary"	0.1411	3.13e-06	3.48e-05	0.9294
RASSF5_AP_9586	RASSF5	ENSG00000136653	chr1 | +	AP	NA	NA	3	BLCA	diagnosis_subtype	"Papillary" vs "Non-Papillary"	-0.1411	3.13e-06	3.48e-05	0.9294
RBM6_RI_64936	RBM6	ENSG00000004534	chr3 | +	RI	14.1	14.3	14.2	BLCA	diagnosis_subtype	"Papillary" vs "Non-Papillary"	0.1098	2.98e-06	3.39e-05	1
RBMX_RI_90220	RBMX	ENSG00000147274	chrX | -	RI	8.1	8.4	8.2:8.3	BLCA	diagnosis_subtype	"Papillary" vs "Non-Papillary"	0.1172	6.59e-07	1.04e-05	1
RCAN1_AP_60494	RCAN1	ENSG00000159200	chr21 | -	AP	NA	NA	5	BLCA	diagnosis_subtype	"Papillary" vs "Non-Papillary"	-0.1246	5.67e-05	0.000306	1
RFC5_AD_24684	RFC5	ENSG00000111445	chr12 | +	AD	2.1	3	2.2	BLCA	diagnosis_subtype	"Papillary" vs "Non-Papillary"	0.1135	0.00266	0.00707	0.8047
RNF128_AP_89804	RNF128	ENSG00000133135	chrX | +	AP	NA	NA	2	BLCA	diagnosis_subtype	"Papillary" vs "Non-Papillary"	-0.3131	1.02e-07	2.61e-06	0.9176
RNF128_AP_89805	RNF128	ENSG00000133135	chrX | +	AP	NA	NA	1	BLCA	diagnosis_subtype	"Papillary" vs "Non-Papillary"	0.3131	1.02e-07	2.61e-06	0.9176
RNH1_AA_13675	RNH1	ENSG00000023191	chr11 | -	AA	2	4.3	4.2	BLCA	diagnosis_subtype	"Papillary" vs "Non-Papillary"	-0.1192	0.00534	0.013	0.8
ROGDI_ES_33858	ROGDI	ENSG00000067836	chr16 | -	ES	3	5	4.1:4.2	BLCA	diagnosis_subtype	"Papillary" vs "Non-Papillary"	0.1004	0.000637	0.0021	0.9247
RPL39L_AP_68070	RPL39L	ENSG00000163923	chr3 | -	AP	NA	NA	1	BLCA	diagnosis_subtype	"Papillary" vs "Non-Papillary"	0.1003	0.013	0.026	1
RPL39L_AP_68071	RPL39L	ENSG00000163923	chr3 | -	AP	NA	NA	3	BLCA	diagnosis_subtype	"Papillary" vs "Non-Papillary"	-0.1003	0.013	0.026	1
RPS24_AA_12297	RPS24	ENSG00000138326	chr10 | +	AA	4	5.2	5.1	BLCA	diagnosis_subtype	"Papillary" vs "Non-Papillary"	0.1359	4.23e-06	4.27e-05	1
RPS24_ES_12295	RPS24	ENSG00000138326	chr10 | +	ES	4	6	5.1:5.2	BLCA	diagnosis_subtype	"Papillary" vs "Non-Papillary"	0.1739	4.4e-06	4.39e-05	1
RPS5_ES_52444	RPS5	ENSG00000083845	chr19 | +	ES	2.3	5	03:04:00	BLCA	diagnosis_subtype	"Papillary" vs "Non-Papillary"	0.159	7.65e-05	0.000391	0.7835
RPS6KA5_ES_28834	RPS6KA5	ENSG00000100784	chr14 | -	ES	1	4	3	BLCA	diagnosis_subtype	"Papillary" vs "Non-Papillary"	0.1179	0.000125	0.000586	0.9224
RPUSD1_AP_33006	RPUSD1	ENSG00000007376	chr16 | -	AP	NA	NA	1	BLCA	diagnosis_subtype	"Papillary" vs "Non-Papillary"	-0.1268	2.81e-06	3.29e-05	0.9529
RPUSD1_AP_33007	RPUSD1	ENSG00000007376	chr16 | -	AP	NA	NA	2.1	BLCA	diagnosis_subtype	"Papillary" vs "Non-Papillary"	0.1268	2.81e-06	3.29e-05	0.9529
RTN4_AP_53582	RTN4	ENSG00000115310	chr2 | -	AP	NA	NA	7	BLCA	diagnosis_subtype	"Papillary" vs "Non-Papillary"	0.1272	0.00825	0.018	0.9906
RTN4_AP_53584	RTN4	ENSG00000115310	chr2 | -	AP	NA	NA	2.1	BLCA	diagnosis_subtype	"Papillary" vs "Non-Papillary"	-0.133	0.0098	0.021	0.9906
RUNX2_AP_76398	RUNX2	ENSG00000124813	chr6 | +	AP	NA	NA	2.1	BLCA	diagnosis_subtype	"Papillary" vs "Non-Papillary"	0.2235	3.95e-05	0.000233	0.8141
RUNX2_AP_76399	RUNX2	ENSG00000124813	chr6 | +	AP	NA	NA	1.1	BLCA	diagnosis_subtype	"Papillary" vs "Non-Papillary"	-0.2235	3.56e-05	0.000218	0.8141
S1PR3_AP_86790	S1PR3	ENSG00000213694	chr9 | +	AP	NA	NA	1	BLCA	diagnosis_subtype	"Papillary" vs "Non-Papillary"	-0.1231	0.000211	0.000892	1
S1PR3_AP_86791	S1PR3	ENSG00000213694	chr9 | +	AP	NA	NA	2.1	BLCA	diagnosis_subtype	"Papillary" vs "Non-Papillary"	0.1231	0.000211	0.000892	1
SAA2_AT_14577	SAA2	ENSG00000134339	chr11 | -	AT	NA	NA	5	BLCA	diagnosis_subtype	"Papillary" vs "Non-Papillary"	0.1519	0.014	0.027	0.9976
SAMD3_AT_77517	SAMD3	ENSG00000164483	chr6 | -	AT	NA	NA	19	BLCA	diagnosis_subtype	"Papillary" vs "Non-Papillary"	-0.1667	2.15e-05	0.000146	0.9412
SAMD3_AT_77518	SAMD3	ENSG00000164483	chr6 | -	AT	NA	NA	13.2	BLCA	diagnosis_subtype	"Papillary" vs "Non-Papillary"	0.1707	2.52e-05	0.000165	0.9412
SAR1B_AP_73412	SAR1B	ENSG00000152700	chr5 | -	AP	NA	NA	7.1	BLCA	diagnosis_subtype	"Papillary" vs "Non-Papillary"	0.2631	4.42e-12	1.7e-09	1
SAR1B_AP_73415	SAR1B	ENSG00000152700	chr5 | -	AP	NA	NA	2	BLCA	diagnosis_subtype	"Papillary" vs "Non-Papillary"	-0.1625	1.8e-10	2.31e-08	1
SCIMP_AT_38666	SCIMP	ENSG00000161929	chr17 | -	AT	NA	NA	5	BLCA	diagnosis_subtype	"Papillary" vs "Non-Papillary"	0.1379	3.33e-09	1.9e-07	1
SCIMP_AT_38667	SCIMP	ENSG00000161929	chr17 | -	AT	NA	NA	6	BLCA	diagnosis_subtype	"Papillary" vs "Non-Papillary"	-0.1378	3.33e-09	1.9e-07	1
SEMA6A_AP_73055	SEMA6A	ENSG00000092421	chr5 | -	AP	NA	NA	1	BLCA	diagnosis_subtype	"Papillary" vs "Non-Papillary"	-0.1118	0.000341	0.0013	0.8541
SEMA6C_AD_7562	SEMA6C	ENSG00000143434	chr1 | -	AD	1.1	2	1.2	BLCA	diagnosis_subtype	"Papillary" vs "Non-Papillary"	0.1799	0.000134	0.000618	0.8941
SEPT5_AP_61071	2023-09-05	ENSG00000184702	chr22 | +	AP	NA	NA	1	BLCA	diagnosis_subtype	"Papillary" vs "Non-Papillary"	-0.1023	2.43e-05	0.000161	0.8306
SEPT5_AP_61072	2023-09-05	ENSG00000184702	chr22 | +	AP	NA	NA	3.1	BLCA	diagnosis_subtype	"Papillary" vs "Non-Papillary"	0.1023	2.43e-05	0.000161	0.8306
SERPINB6_AP_75147	SERPINB6	ENSG00000124570	chr6 | -	AP	NA	NA	4	BLCA	diagnosis_subtype	"Papillary" vs "Non-Papillary"	0.144	1.16e-07	2.84e-06	1
SH3TC2_AP_74001	SH3TC2	ENSG00000169247	chr5 | -	AP	NA	NA	1	BLCA	diagnosis_subtype	"Papillary" vs "Non-Papillary"	-0.1297	0.00594	0.014	0.7624
SH3TC2_AP_74002	SH3TC2	ENSG00000169247	chr5 | -	AP	NA	NA	17.1	BLCA	diagnosis_subtype	"Papillary" vs "Non-Papillary"	0.135	0.00476	0.012	0.7624
SIGIRR_AP_13650	SIGIRR	ENSG00000185187	chr11 | -	AP	NA	NA	2	BLCA	diagnosis_subtype	"Papillary" vs "Non-Papillary"	-0.1284	3.75e-06	3.95e-05	0.9906
SIGIRR_AP_13651	SIGIRR	ENSG00000185187	chr11 | -	AP	NA	NA	1.1	BLCA	diagnosis_subtype	"Papillary" vs "Non-Papillary"	0.1284	3.75e-06	3.95e-05	0.9906
SIMC1_ES_74640	SIMC1	ENSG00000170085	chr5 | +	ES	1	4	02:03:00	BLCA	diagnosis_subtype	"Papillary" vs "Non-Papillary"	0.134	0.000147	0.000668	0.9647
SIN3B_AP_48212	SIN3B	ENSG00000127511	chr19 | +	AP	NA	NA	1	BLCA	diagnosis_subtype	"Papillary" vs "Non-Papillary"	-0.1147	6.6e-05	0.000346	0.9482
SIN3B_AP_48213	SIN3B	ENSG00000127511	chr19 | +	AP	NA	NA	11.1	BLCA	diagnosis_subtype	"Papillary" vs "Non-Papillary"	0.1147	6.6e-05	0.000346	0.9482
SIRT2_AA_49713	SIRT2	ENSG00000068903	chr19 | -	AA	2	3.2	3.1	BLCA	diagnosis_subtype	"Papillary" vs "Non-Papillary"	0.1088	1.08e-05	8.53e-05	0.9506
SLC13A3_AT_59695	SLC13A3	ENSG00000158296	chr20 | -	AT	NA	NA	16	BLCA	diagnosis_subtype	"Papillary" vs "Non-Papillary"	-0.137	0.012	0.024	0.9694
SLC13A3_AT_59696	SLC13A3	ENSG00000158296	chr20 | -	AT	NA	NA	5	BLCA	diagnosis_subtype	"Papillary" vs "Non-Papillary"	0.114	0.022	0.04	0.9694
SLC16A1_AT_4265	SLC16A1	ENSG00000155380	chr1 | -	AT	NA	NA	5.2	BLCA	diagnosis_subtype	"Papillary" vs "Non-Papillary"	0.1746	2.43e-09	1.52e-07	1
SLC16A1_AT_4266	SLC16A1	ENSG00000155380	chr1 | -	AT	NA	NA	6	BLCA	diagnosis_subtype	"Papillary" vs "Non-Papillary"	-0.1746	2.43e-09	1.52e-07	1
SLC26A6_AP_64720	SLC26A6	ENSG00000225697	chr3 | -	AP	NA	NA	2.1	BLCA	diagnosis_subtype	"Papillary" vs "Non-Papillary"	0.1034	4.94e-05	0.000276	0.9247
SLC26A6_AP_64721	SLC26A6	ENSG00000225697	chr3 | -	AP	NA	NA	1	BLCA	diagnosis_subtype	"Papillary" vs "Non-Papillary"	-0.1034	4.94e-05	0.000276	0.9247
SLC27A1_RI_48315	SLC27A1	ENSG00000130304	chr19 | +	RI	4.1	4.4	4.2:4.3	BLCA	diagnosis_subtype	"Papillary" vs "Non-Papillary"	0.1027	0.000119	0.000562	0.7906
SLC29A1_AP_76356	SLC29A1	ENSG00000112759	chr6 | +	AP	NA	NA	3.1	BLCA	diagnosis_subtype	"Papillary" vs "Non-Papillary"	-0.1352	0.000643	0.0021	0.9788
SLC29A1_AP_76359	SLC29A1	ENSG00000112759	chr6 | +	AP	NA	NA	1	BLCA	diagnosis_subtype	"Papillary" vs "Non-Papillary"	0.1291	0.000641	0.0021	0.9788
SLC4A8_AT_21855	SLC4A8	ENSG00000050438	chr12 | +	AT	NA	NA	20	BLCA	diagnosis_subtype	"Papillary" vs "Non-Papillary"	0.1233	0.00124	0.00375	0.9929
SLC6A8_AP_90462	SLC6A8	ENSG00000130821	chrX | +	AP	NA	NA	1	BLCA	diagnosis_subtype	"Papillary" vs "Non-Papillary"	-0.1245	1.26e-06	1.73e-05	0.96
SLC6A8_AP_90463	SLC6A8	ENSG00000130821	chrX | +	AP	NA	NA	2	BLCA	diagnosis_subtype	"Papillary" vs "Non-Papillary"	0.1245	1.26e-06	1.73e-05	0.96
SLC9B2_AP_70167	SLC9B2	ENSG00000164038	chr4 | -	AP	NA	NA	1	BLCA	diagnosis_subtype	"Papillary" vs "Non-Papillary"	0.1082	1.31e-07	3.09e-06	0.9859
SLC9B2_AP_70169	SLC9B2	ENSG00000164038	chr4 | -	AP	NA	NA	6	BLCA	diagnosis_subtype	"Papillary" vs "Non-Papillary"	-0.1038	2.6e-07	5.25e-06	0.9859
SLMAP_ES_65394	SLMAP	ENSG00000163681	chr3 | +	ES	24	26	25	BLCA	diagnosis_subtype	"Papillary" vs "Non-Papillary"	-0.1498	6.25e-06	5.59e-05	0.9929
SMARCC2_ES_22392	SMARCC2	ENSG00000139613	chr12 | -	ES	28.1	29	28.3	BLCA	diagnosis_subtype	"Papillary" vs "Non-Papillary"	0.1054	0.00181	0.00515	0.8965
SPHK2_AP_50779	SPHK2	ENSG00000063176	chr19 | +	AP	NA	NA	3.1	BLCA	diagnosis_subtype	"Papillary" vs "Non-Papillary"	0.1713	5.51e-05	0.000301	0.8188
SPHK2_AP_50780	SPHK2	ENSG00000063176	chr19 | +	AP	NA	NA	1.1	BLCA	diagnosis_subtype	"Papillary" vs "Non-Papillary"	-0.173	2.61e-05	0.00017	0.8188
SPTB_AT_27908	SPTB	ENSG00000070182	chr14 | -	AT	NA	NA	36	BLCA	diagnosis_subtype	"Papillary" vs "Non-Papillary"	-0.1294	0.00889	0.019	1
SPTB_AT_27909	SPTB	ENSG00000070182	chr14 | -	AT	NA	NA	32.2	BLCA	diagnosis_subtype	"Papillary" vs "Non-Papillary"	0.1294	0.00889	0.019	1
ST3GAL4_AP_19391	ST3GAL4	ENSG00000110080	chr11 | +	AP	NA	NA	1	BLCA	diagnosis_subtype	"Papillary" vs "Non-Papillary"	-0.1494	7.2e-09	2.97e-07	0.9929
ST3GAL4_AP_19395	ST3GAL4	ENSG00000110080	chr11 | +	AP	NA	NA	5.1	BLCA	diagnosis_subtype	"Papillary" vs "Non-Papillary"	0.2845	3.77e-13	4.08e-10	0.9929
STRA6_AD_31688	STRA6	ENSG00000137868	chr15 | -	AD	18.1	19	18.2	BLCA	diagnosis_subtype	"Papillary" vs "Non-Papillary"	0.1587	0.000526	0.00181	1
SULT2B1_AP_50773	SULT2B1	ENSG00000088002	chr19 | +	AP	NA	NA	1	BLCA	diagnosis_subtype	"Papillary" vs "Non-Papillary"	-0.1388	0.012	0.024	0.9976
SULT2B1_AP_50774	SULT2B1	ENSG00000088002	chr19 | +	AP	NA	NA	2.1	BLCA	diagnosis_subtype	"Papillary" vs "Non-Papillary"	0.1388	0.012	0.024	0.9976
SUPT7L_RI_53041	SUPT7L	ENSG00000119760	chr2 | -	RI	2.1	2.4	2.2:2.3	BLCA	diagnosis_subtype	"Papillary" vs "Non-Papillary"	0.1124	2.04e-05	0.000141	0.9929
SV2C_AT_72546	SV2C	ENSG00000122012	chr5 | +	AT	NA	NA	14	BLCA	diagnosis_subtype	"Papillary" vs "Non-Papillary"	-0.1386	0.000271	0.00108	0.9953
SV2C_AT_72547	SV2C	ENSG00000122012	chr5 | +	AT	NA	NA	13	BLCA	diagnosis_subtype	"Papillary" vs "Non-Papillary"	0.1386	0.000271	0.00108	0.9953
SYMPK_AP_50529	SYMPK	ENSG00000125755	chr19 | -	AP	NA	NA	1	BLCA	diagnosis_subtype	"Papillary" vs "Non-Papillary"	-0.1053	0.00041	0.0015	1
SYMPK_AP_50530	SYMPK	ENSG00000125755	chr19 | -	AP	NA	NA	2.1	BLCA	diagnosis_subtype	"Papillary" vs "Non-Papillary"	0.1053	0.00041	0.0015	1
SYT8_AP_13856	SYT8	ENSG00000149043	chr11 | +	AP	NA	NA	4	BLCA	diagnosis_subtype	"Papillary" vs "Non-Papillary"	0.1029	0.00253	0.00679	0.9153
SYTL2_AP_18143	SYTL2	ENSG00000137501	chr11 | -	AP	NA	NA	12.1	BLCA	diagnosis_subtype	"Papillary" vs "Non-Papillary"	0.1804	1.78e-05	0.000126	0.9082
TAGLN_RI_18896	TAGLN	ENSG00000149591	chr11 | +	RI	1.1	1.3	1.2	BLCA	diagnosis_subtype	"Papillary" vs "Non-Papillary"	0.1396	3.6e-06	3.84e-05	0.9247
TBXAS1_ES_81971	TBXAS1	ENSG00000059377	chr7 | +	ES	7.1	9	8	BLCA	diagnosis_subtype	"Papillary" vs "Non-Papillary"	0.1549	0.000544	0.00186	0.8118
TCF3_AP_46532	TCF3	ENSG00000071564	chr19 | -	AP	NA	NA	1	BLCA	diagnosis_subtype	"Papillary" vs "Non-Papillary"	-0.1075	3.91e-05	0.000232	0.9529
TCF3_AP_46533	TCF3	ENSG00000071564	chr19 | -	AP	NA	NA	2.1	BLCA	diagnosis_subtype	"Papillary" vs "Non-Papillary"	0.1075	3.91e-05	0.000232	0.9529
TEAD2_AP_50917	TEAD2	ENSG00000074219	chr19 | -	AP	NA	NA	1.1	BLCA	diagnosis_subtype	"Papillary" vs "Non-Papillary"	-0.1279	0.00211	0.00591	0.7788
TECR_ES_564146	TECR	ENSG00000099797	chr19 | +	ES	1	5.3	02:04:00	BLCA	diagnosis_subtype	"Papillary" vs "Non-Papillary"	-0.1023	0.00135	0.00403	0.7835
THAP4_AP_58391	THAP4	ENSG00000176946	chr2 | -	AP	NA	NA	1	BLCA	diagnosis_subtype	"Papillary" vs "Non-Papillary"	-0.3398	8.62e-08	2.37e-06	0.9976
THAP4_AP_58392	THAP4	ENSG00000176946	chr2 | -	AP	NA	NA	3	BLCA	diagnosis_subtype	"Papillary" vs "Non-Papillary"	0.3398	8.62e-08	2.37e-06	0.9976
TLE2_RI_46654	TLE2	ENSG00000065717	chr19 | -	RI	10.1	10.4	10.2:10.3	BLCA	diagnosis_subtype	"Papillary" vs "Non-Papillary"	0.1283	1.02e-05	8.17e-05	0.8118
TLE2_RI_46656	TLE2	ENSG00000065717	chr19 | -	RI	10.1	10.3	10.2	BLCA	diagnosis_subtype	"Papillary" vs "Non-Papillary"	0.1266	6.84e-06	6.01e-05	0.8329
TMEM107_ES_39115	TMEM107	ENSG00000179029	chr17 | -	ES	2	3.7	3.1:3.2:3.3:3.4:3.5	BLCA	diagnosis_subtype	"Papillary" vs "Non-Papillary"	0.1561	0.000446	0.0016	0.8612
TMEM108_AT_66827	TMEM108	ENSG00000144868	chr3 | +	AT	NA	NA	8	BLCA	diagnosis_subtype	"Papillary" vs "Non-Papillary"	-0.2154	8.88e-05	0.000443	1
TMEM108_AT_66828	TMEM108	ENSG00000144868	chr3 | +	AT	NA	NA	6	BLCA	diagnosis_subtype	"Papillary" vs "Non-Papillary"	0.2154	8.88e-05	0.000443	1
TMEM130_AP_80589	TMEM130	ENSG00000166448	chr7 | -	AP	NA	NA	3	BLCA	diagnosis_subtype	"Papillary" vs "Non-Papillary"	0.1054	0.00126	0.0038	0.9553
TMEM161B_AT_72730	TMEM161B	ENSG00000164180	chr5 | -	AT	NA	NA	12.2	BLCA	diagnosis_subtype	"Papillary" vs "Non-Papillary"	-0.1152	2.06e-06	2.66e-05	1
TMEM161B_AT_72731	TMEM161B	ENSG00000164180	chr5 | -	AT	NA	NA	13	BLCA	diagnosis_subtype	"Papillary" vs "Non-Papillary"	0.1152	2.91e-06	3.37e-05	1
TMEM175_ES_68431	TMEM175	ENSG00000127419	chr4 | +	ES	3	5.1	4.1:4.2	BLCA	diagnosis_subtype	"Papillary" vs "Non-Papillary"	0.1069	2.15e-06	2.74e-05	0.9859
TMEM175_ES_68433	TMEM175	ENSG00000127419	chr4 | +	ES	1	5.1	2:3:4.1:4.2	BLCA	diagnosis_subtype	"Papillary" vs "Non-Papillary"	0.1132	2.53e-06	3.06e-05	0.9812
TMEM205_RI_47664	TMEM205	ENSG00000105518	chr19 | -	RI	2.2	2.5	2.3:2.4	BLCA	diagnosis_subtype	"Papillary" vs "Non-Papillary"	0.1346	1.43e-06	1.95e-05	1
TMPRSS13_AT_18947	TMPRSS13	ENSG00000137747	chr11 | -	AT	NA	NA	9.2	BLCA	diagnosis_subtype	"Papillary" vs "Non-Papillary"	0.1278	2.2e-06	2.75e-05	0.9459
TMPRSS13_AT_18949	TMPRSS13	ENSG00000137747	chr11 | -	AT	NA	NA	13	BLCA	diagnosis_subtype	"Papillary" vs "Non-Papillary"	-0.1774	8.91e-09	3.51e-07	0.9459
TNC_ES_87357	TNC	ENSG00000041982	chr9 | -	ES	11	20	12:13:14:15:16:19	BLCA	diagnosis_subtype	"Papillary" vs "Non-Papillary"	-0.1364	0.000447	0.0016	0.8706
TNFRSF12A_AD_33349	TNFRSF12A	ENSG00000006327	chr16 | +	AD	2.1	4	2.2	BLCA	diagnosis_subtype	"Papillary" vs "Non-Papillary"	0.2232	1.52e-08	5.56e-07	0.8847
TNFRSF12A_ES_33347	TNFRSF12A	ENSG00000006327	chr16 | +	ES	2.1	4	3.1:3.2	BLCA	diagnosis_subtype	"Papillary" vs "Non-Papillary"	0.1514	3.09e-07	6.17e-06	0.9012
TOR2A_AD_87657	TOR2A	ENSG00000160404	chr9 | -	AD	3.1	3.5	3.2:3.3	BLCA	diagnosis_subtype	"Papillary" vs "Non-Papillary"	0.1118	0.000122	0.000573	0.9929
TPM1_AP_30979	TPM1	ENSG00000140416	chr15 | +	AP	NA	NA	1	BLCA	diagnosis_subtype	"Papillary" vs "Non-Papillary"	-0.2889	1.69e-11	5.19e-09	1
TPM1_AP_30980	TPM1	ENSG00000140416	chr15 | +	AP	NA	NA	4	BLCA	diagnosis_subtype	"Papillary" vs "Non-Papillary"	0.194	7.35e-09	2.97e-07	1
TPM2_ES_98133	TPM2	ENSG00000198467	chr9 | -	ES	5	7	6	BLCA	diagnosis_subtype	"Papillary" vs "Non-Papillary"	0.1718	4.73e-05	0.000268	0.9082
TPM4_AP_48124	TPM4	ENSG00000167460	chr19 | +	AP	NA	NA	1	BLCA	diagnosis_subtype	"Papillary" vs "Non-Papillary"	-0.189	0.00231	0.00633	1
TPM4_AP_48125	TPM4	ENSG00000167460	chr19 | +	AP	NA	NA	3	BLCA	diagnosis_subtype	"Papillary" vs "Non-Papillary"	0.189	0.00231	0.00633	1
TRAP1_AP_33617	TRAP1	ENSG00000126602	chr16 | -	AP	NA	NA	9.1	BLCA	diagnosis_subtype	"Papillary" vs "Non-Papillary"	0.1025	2.28e-05	0.000153	0.9906
TRAP1_AP_33618	TRAP1	ENSG00000126602	chr16 | -	AP	NA	NA	1	BLCA	diagnosis_subtype	"Papillary" vs "Non-Papillary"	-0.1025	2.28e-05	0.000153	0.9906
TRIM13_RI_25920	TRIM13	ENSG00000204977	chr13 | +	RI	1.2	1.4	1.3	BLCA	diagnosis_subtype	"Papillary" vs "Non-Papillary"	0.1007	0.000137	0.000627	0.9835
TRMT2B_RI_89625	TRMT2B	ENSG00000188917	chrX | -	RI	2.1	2.3	2.2	BLCA	diagnosis_subtype	"Papillary" vs "Non-Papillary"	0.129	0.00474	0.011	0.8376
TTC13_ME_10258	TTC13	ENSG00000143643	chr1 | -	ME	8	11	9|10	BLCA	diagnosis_subtype	"Papillary" vs "Non-Papillary"	-0.1622	1.97e-05	0.000136	0.8188
TTC7A_AP_53482	TTC7A	ENSG00000068724	chr2 | +	AP	NA	NA	3	BLCA	diagnosis_subtype	"Papillary" vs "Non-Papillary"	-0.1059	0.00166	0.00483	0.9835
TTC7A_AP_53483	TTC7A	ENSG00000068724	chr2 | +	AP	NA	NA	1	BLCA	diagnosis_subtype	"Papillary" vs "Non-Papillary"	0.1059	0.00166	0.00483	0.9835
TUBB3_AP_38167	TUBB3	ENSG00000198211	chr16 | +	AP	NA	NA	4	BLCA	diagnosis_subtype	"Papillary" vs "Non-Papillary"	-0.1224	0.00369	0.00927	1
TUBB6_AT_44667	TUBB6	ENSG00000176014	chr18 | +	AT	NA	NA	5.5	BLCA	diagnosis_subtype	"Papillary" vs "Non-Papillary"	-0.1134	3.67e-10	3.76e-08	1
TUBB6_AT_44669	TUBB6	ENSG00000176014	chr18 | +	AT	NA	NA	6	BLCA	diagnosis_subtype	"Papillary" vs "Non-Papillary"	0.1124	4.9e-10	4.7e-08	1
UGT1A1_AP_58049	UGT1A1	ENSG00000242366	chr2 | +	AP	NA	NA	5	BLCA	diagnosis_subtype	"Papillary" vs "Non-Papillary"	0.2536	3.83e-06	3.98e-05	0.8635
UGT1A1_AP_58052	UGT1A1	ENSG00000242366	chr2 | +	AP	NA	NA	1	BLCA	diagnosis_subtype	"Papillary" vs "Non-Papillary"	-0.1438	0.00678	0.015	0.8635
UGT1A6_AP_58058	UGT1A6	ENSG00000167165	chr2 | +	AP	NA	NA	1	BLCA	diagnosis_subtype	"Papillary" vs "Non-Papillary"	-0.1243	3.72e-05	0.000226	0.9106
UGT1A6_AP_58059	UGT1A6	ENSG00000167165	chr2 | +	AP	NA	NA	2.1	BLCA	diagnosis_subtype	"Papillary" vs "Non-Papillary"	0.1243	3.72e-05	0.000226	0.9106
ULK3_RI_31757	ULK3	ENSG00000140474	chr15 | -	RI	6.1	6.3	6.2	BLCA	diagnosis_subtype	"Papillary" vs "Non-Papillary"	0.1003	2.6e-06	3.12e-05	0.9906
UNG_AP_24277	UNG	ENSG00000076248	chr12 | +	AP	NA	NA	1	BLCA	diagnosis_subtype	"Papillary" vs "Non-Papillary"	-0.1067	4.28e-07	7.83e-06	0.9929
UNG_AP_24278	UNG	ENSG00000076248	chr12 | +	AP	NA	NA	2.1	BLCA	diagnosis_subtype	"Papillary" vs "Non-Papillary"	0.1067	4.28e-07	7.83e-06	0.9929
UPF3B_ES_89980	UPF3B	ENSG00000125351	chrX | -	ES	7	9	8	BLCA	diagnosis_subtype	"Papillary" vs "Non-Papillary"	0.112	8.44e-07	1.22e-05	0.9835
UPK3B_AT_80182	UPK3B	ENSG00000243566	chr7 | +	AT	NA	NA	8	BLCA	diagnosis_subtype	"Papillary" vs "Non-Papillary"	0.1082	0.00108	0.00329	1
UPK3B_AT_80183	UPK3B	ENSG00000243566	chr7 | +	AT	NA	NA	6	BLCA	diagnosis_subtype	"Papillary" vs "Non-Papillary"	-0.1044	0.00126	0.0038	1
USP35_AP_18016	USP35	ENSG00000118369	chr11 | +	AP	NA	NA	1	BLCA	diagnosis_subtype	"Papillary" vs "Non-Papillary"	-0.109	6.07e-05	0.000324	0.9459
USP35_AP_18017	USP35	ENSG00000118369	chr11 | +	AP	NA	NA	4.1	BLCA	diagnosis_subtype	"Papillary" vs "Non-Papillary"	0.1077	0.000132	0.000615	0.9459
VLDLR_ES_85739	VLDLR	ENSG00000147852	chr9 | +	ES	15	17	16	BLCA	diagnosis_subtype	"Papillary" vs "Non-Papillary"	-0.1025	0.00015	0.000679	0.8306
VPS39_ES_30131	VPS39	ENSG00000166887	chr15 | -	ES	2	4	3	BLCA	diagnosis_subtype	"Papillary" vs "Non-Papillary"	0.1203	0.00274	0.00723	0.7741
WDR62_RI_49339	WDR62	ENSG00000075702	chr19 | +	RI	25.5	25.7	25.6	BLCA	diagnosis_subtype	"Papillary" vs "Non-Papillary"	0.1262	5.41e-06	5.02e-05	1
WDR66_AT_24918	WDR66	ENSG00000158023	chr12 | +	AT	NA	NA	23	BLCA	diagnosis_subtype	"Papillary" vs "Non-Papillary"	-0.1186	0.000233	0.000944	0.9835
WDR66_AT_24919	WDR66	ENSG00000158023	chr12 | +	AT	NA	NA	18	BLCA	diagnosis_subtype	"Papillary" vs "Non-Papillary"	0.1186	0.000233	0.000944	0.9835
WNT2B_AP_4198	WNT2B	ENSG00000134245	chr1 | +	AP	NA	NA	1	BLCA	diagnosis_subtype	"Papillary" vs "Non-Papillary"	0.1104	4.64e-08	1.37e-06	0.9765
WNT2B_AP_4199	WNT2B	ENSG00000134245	chr1 | +	AP	NA	NA	3	BLCA	diagnosis_subtype	"Papillary" vs "Non-Papillary"	-0.1104	4.64e-08	1.37e-06	0.9765
XAF1_AA_38812	XAF1	ENSG00000132530	chr17 | +	AA	2.1	4.3	4.1:4.2	BLCA	diagnosis_subtype	"Papillary" vs "Non-Papillary"	0.1349	5.32e-06	5.02e-05	0.9318
YME1L1_RI_11060	YME1L1	ENSG00000136758	chr10 | -	RI	3.1	3.3	3.2	BLCA	diagnosis_subtype	"Papillary" vs "Non-Papillary"	0.1456	0.025	0.045	1
ZBTB43_AP_87600	ZBTB43	ENSG00000169155	chr9 | +	AP	NA	NA	3.1	BLCA	diagnosis_subtype	"Papillary" vs "Non-Papillary"	0.1108	0.00187	0.00529	1
ZBTB43_AP_87601	ZBTB43	ENSG00000169155	chr9 | +	AP	NA	NA	1	BLCA	diagnosis_subtype	"Papillary" vs "Non-Papillary"	-0.1108	0.00187	0.00529	1
ZFP64_AP_59809	ZFP64	ENSG00000020256	chr20 | -	AP	NA	NA	1	BLCA	diagnosis_subtype	"Papillary" vs "Non-Papillary"	0.1264	1.29e-05	9.63e-05	0.96
ZNF138_ES_79836	ZNF138	ENSG00000197008	chr7 | +	ES	3	6	4.1:4.2:5	BLCA	diagnosis_subtype	"Papillary" vs "Non-Papillary"	0.152	0.000805	0.00255	0.7882
ZNF223_ES_50275	ZNF223	ENSG00000267022	chr19 | +	ES	7.1	9.1	8	BLCA	diagnosis_subtype	"Papillary" vs "Non-Papillary"	0.1082	0.014	0.028	0.8141
ZNF530_ES_52304	ZNF530	ENSG00000183647	chr19 | +	ES	3	5	4.1	BLCA	diagnosis_subtype	"Papillary" vs "Non-Papillary"	0.1244	0.00304	0.00791	0.9294
ZNF532_AP_45682	ZNF532	ENSG00000074657	chr18 | +	AP	NA	NA	4.1	BLCA	diagnosis_subtype	"Papillary" vs "Non-Papillary"	0.1042	0.000117	0.000556	0.8329
ZNF575_AP_50203	ZNF575	ENSG00000176472	chr19 | +	AP	NA	NA	1	BLCA	diagnosis_subtype	"Papillary" vs "Non-Papillary"	0.1035	0.012	0.024	0.8235
ZNF575_AP_50204	ZNF575	ENSG00000176472	chr19 | +	AP	NA	NA	4	BLCA	diagnosis_subtype	"Papillary" vs "Non-Papillary"	-0.1035	0.012	0.024	0.8235
ZNF626_AT_48723	ZNF626	ENSG00000188171	chr19 | -	AT	NA	NA	4	BLCA	diagnosis_subtype	"Papillary" vs "Non-Papillary"	-0.1642	2.49e-10	2.74e-08	1
ZNF626_AT_48724	ZNF626	ENSG00000188171	chr19 | -	AT	NA	NA	5	BLCA	diagnosis_subtype	"Papillary" vs "Non-Papillary"	0.1642	2.49e-10	2.74e-08	1
ZNF692_RI_10563	ZNF692	ENSG00000171163	chr1 | -	RI	3.4	3.6	3.5	BLCA	diagnosis_subtype	"Papillary" vs "Non-Papillary"	0.1118	6.02e-07	9.73e-06	0.9906
ZNF783_RI_82189	ZNF783	ENSG00000204946	chr7 | +	RI	14.1	14.3	14.2	BLCA	diagnosis_subtype	"Papillary" vs "Non-Papillary"	0.1039	0.000478	0.00168	0.7882
ZNF85_AP_48732	ZNF85	ENSG00000105750	chr19 | +	AP	NA	NA	4	BLCA	diagnosis_subtype	"Papillary" vs "Non-Papillary"	0.1251	4.84e-06	4.72e-05	1
ZNF85_AP_48733	ZNF85	ENSG00000105750	chr19 | +	AP	NA	NA	1.1	BLCA	diagnosis_subtype	"Papillary" vs "Non-Papillary"	-0.1251	4.84e-06	4.72e-05	1
AACS_AP_25170	AACS	ENSG00000081760	chr12 | +	AP	NA	NA	13.1	BLCA	neoplasm_histologic_grade	"Low Grade" vs "High Grade"	0.1519	0.000495	0.00122	1
AACS_AP_25173	AACS	ENSG00000081760	chr12 | +	AP	NA	NA	1	BLCA	neoplasm_histologic_grade	"Low Grade" vs "High Grade"	-0.1979	0.00117	0.00229	1
AAK1_AT_53856	AAK1	ENSG00000115977	chr2 | -	AT	NA	NA	18.2	BLCA	neoplasm_histologic_grade	"Low Grade" vs "High Grade"	0.1632	0.000161	0.000536	1
AAK1_AT_53858	AAK1	ENSG00000115977	chr2 | -	AT	NA	NA	23	BLCA	neoplasm_histologic_grade	"Low Grade" vs "High Grade"	-0.1825	0.000343	0.000936	1
ABCB9_AP_24994	ABCB9	ENSG00000150967	chr12 | -	AP	NA	NA	1	BLCA	neoplasm_histologic_grade	"Low Grade" vs "High Grade"	0.1391	0.000783	0.00174	1
ABCC6_AT_34219	ABCC6	ENSG00000091262	chr16 | -	AT	NA	NA	2.2	BLCA	neoplasm_histologic_grade	"Low Grade" vs "High Grade"	-0.2924	1.25e-05	8.58e-05	1
ABCC6_AT_34220	ABCC6	ENSG00000091262	chr16 | -	AT	NA	NA	32	BLCA	neoplasm_histologic_grade	"Low Grade" vs "High Grade"	0.2924	1.25e-05	8.58e-05	1
ABCE1_ES_70753	ABCE1	ENSG00000164163	chr4 | +	ES	13	15	14	BLCA	neoplasm_histologic_grade	"Low Grade" vs "High Grade"	0.1904	0.00114	0.00227	1
ABCG1_AD_60705	ABCG1	ENSG00000160179	chr21 | +	AD	16.1	17	16.2	BLCA	neoplasm_histologic_grade	"Low Grade" vs "High Grade"	-0.1006	0.012	0.015	0.9224
ABHD3_AD_44778	ABHD3	ENSG00000158201	chr18 | -	AD	5.1	6	5.2	BLCA	neoplasm_histologic_grade	"Low Grade" vs "High Grade"	0.1662	0.00249	0.00409	0.9882
ABHD3_ES_44779	ABHD3	ENSG00000158201	chr18 | -	ES	3	6	4:5.1:5.2	BLCA	neoplasm_histologic_grade	"Low Grade" vs "High Grade"	0.1012	0.02	0.024	0.9812
ABI1_ES_11032	ABI1	ENSG00000136754	chr10 | -	ES	11.2	13	12	BLCA	neoplasm_histologic_grade	"Low Grade" vs "High Grade"	0.1272	5.47e-05	0.000241	0.9859
ABI1_ES_11037	ABI1	ENSG00000136754	chr10 | -	ES	9	13	11.1:11.2:12	BLCA	neoplasm_histologic_grade	"Low Grade" vs "High Grade"	0.1498	0.000209	0.000655	0.9882
ABI1_ES_11038	ABI1	ENSG00000136754	chr10 | -	ES	9	13	11.2:12	BLCA	neoplasm_histologic_grade	"Low Grade" vs "High Grade"	0.1897	0.00155	0.00285	0.9741
ABLIM2_AT_68744	ABLIM2	ENSG00000163995	chr4 | -	AT	NA	NA	25	BLCA	neoplasm_histologic_grade	"Low Grade" vs "High Grade"	0.2018	0.000267	0.000787	0.9906
ABLIM2_AT_68745	ABLIM2	ENSG00000163995	chr4 | -	AT	NA	NA	18.4	BLCA	neoplasm_histologic_grade	"Low Grade" vs "High Grade"	-0.2018	0.000267	0.000787	0.9906
ACAN_AT_32395	ACAN	ENSG00000157766	chr15 | +	AT	NA	NA	18	BLCA	neoplasm_histologic_grade	"Low Grade" vs "High Grade"	-0.1826	0.000214	0.000667	1
ACAN_AT_32396	ACAN	ENSG00000157766	chr15 | +	AT	NA	NA	10.2	BLCA	neoplasm_histologic_grade	"Low Grade" vs "High Grade"	0.1826	0.000214	0.000667	1
ACAP1_AP_38918	ACAP1	ENSG00000072818	chr17 | +	AP	NA	NA	21.1	BLCA	neoplasm_histologic_grade	"Low Grade" vs "High Grade"	0.2554	6.35e-06	5.45e-05	0.9529
ACAP1_AP_38921	ACAP1	ENSG00000072818	chr17 | +	AP	NA	NA	1	BLCA	neoplasm_histologic_grade	"Low Grade" vs "High Grade"	-0.2682	0.000286	0.000816	0.9529
ACAT2_AP_78314	ACAT2	ENSG00000120437	chr6 | +	AP	NA	NA	2	BLCA	neoplasm_histologic_grade	"Low Grade" vs "High Grade"	-0.1004	0.00727	0.00997	1
ACAT2_AP_78315	ACAT2	ENSG00000120437	chr6 | +	AP	NA	NA	1	BLCA	neoplasm_histologic_grade	"Low Grade" vs "High Grade"	0.1004	0.00727	0.00997	1
ACHE_AA_81027	ACHE	ENSG00000087085	chr7 | -	AA	5	6.2	6.1	BLCA	neoplasm_histologic_grade	"Low Grade" vs "High Grade"	-0.1152	0.032	0.036	0.8729
ACIN1_AP_26701	ACIN1	ENSG00000100813	chr14 | -	AP	NA	NA	1	BLCA	neoplasm_histologic_grade	"Low Grade" vs "High Grade"	0.1084	0.00268	0.00435	0.9976
ACIN1_AP_26702	ACIN1	ENSG00000100813	chr14 | -	AP	NA	NA	9.1	BLCA	neoplasm_histologic_grade	"Low Grade" vs "High Grade"	-0.1084	0.00268	0.00435	0.9976
ACOT7_AP_389	ACOT7	ENSG00000097021	chr1 | -	AP	NA	NA	1.1	BLCA	neoplasm_histologic_grade	"Low Grade" vs "High Grade"	-0.1771	0.00618	0.00871	1
ACOT7_AP_390	ACOT7	ENSG00000097021	chr1 | -	AP	NA	NA	4	BLCA	neoplasm_histologic_grade	"Low Grade" vs "High Grade"	0.1894	8.67e-05	0.000337	1
ACOXL_AT_54941	ACOXL	ENSG00000153093	chr2 | +	AT	NA	NA	21	BLCA	neoplasm_histologic_grade	"Low Grade" vs "High Grade"	0.1564	2.21e-07	6.11e-06	0.9906
ACOXL_AT_54942	ACOXL	ENSG00000153093	chr2 | +	AT	NA	NA	11	BLCA	neoplasm_histologic_grade	"Low Grade" vs "High Grade"	-0.1067	1.24e-08	8.07e-07	0.9906
ACPP_AT_66802	ACPP	ENSG00000014257	chr3 | +	AT	NA	NA	10.2	BLCA	neoplasm_histologic_grade	"Low Grade" vs "High Grade"	0.1313	0.00157	0.00288	0.9953
ACPP_AT_66803	ACPP	ENSG00000014257	chr3 | +	AT	NA	NA	11	BLCA	neoplasm_histologic_grade	"Low Grade" vs "High Grade"	-0.1313	0.00157	0.00288	0.9953
ADAL_AT_30232	ADAL	ENSG00000168803	chr15 | +	AT	NA	NA	11.2	BLCA	neoplasm_histologic_grade	"Low Grade" vs "High Grade"	0.1141	0.045	0.05	1
ADAL_AT_30234	ADAL	ENSG00000168803	chr15 | +	AT	NA	NA	13	BLCA	neoplasm_histologic_grade	"Low Grade" vs "High Grade"	-0.1141	0.045	0.05	1
ADAMTS2_AT_74891	ADAMTS2	ENSG00000087116	chr5 | -	AT	NA	NA	11	BLCA	neoplasm_histologic_grade	"Low Grade" vs "High Grade"	0.1372	2.66e-05	0.000146	1
ADAMTS2_AT_74892	ADAMTS2	ENSG00000087116	chr5 | -	AT	NA	NA	23	BLCA	neoplasm_histologic_grade	"Low Grade" vs "High Grade"	-0.1372	2.66e-05	0.000146	1
ADAT2_AP_77977	ADAT2	ENSG00000189007	chr6 | -	AP	NA	NA	1	BLCA	neoplasm_histologic_grade	"Low Grade" vs "High Grade"	-0.1474	0.00103	0.00211	0.9694
ADAT2_AP_77978	ADAT2	ENSG00000189007	chr6 | -	AP	NA	NA	2	BLCA	neoplasm_histologic_grade	"Low Grade" vs "High Grade"	0.1474	0.00103	0.00211	0.9694
ADCK1_ES_28635	ADCK1	ENSG00000063761	chr14 | +	ES	3	5	4	BLCA	neoplasm_histologic_grade	"Low Grade" vs "High Grade"	0.1004	0.00205	0.00354	1
ADCK3_AP_10035	ADCK3	ENSG00000163050	chr1 | +	AP	NA	NA	7	BLCA	neoplasm_histologic_grade	"Low Grade" vs "High Grade"	-0.1206	0.013	0.016	1
ADCK3_AP_10036	ADCK3	ENSG00000163050	chr1 | +	AP	NA	NA	1	BLCA	neoplasm_histologic_grade	"Low Grade" vs "High Grade"	0.1206	0.013	0.016	1
ADD2_AT_53902	ADD2	ENSG00000075340	chr2 | -	AT	NA	NA	14.2	BLCA	neoplasm_histologic_grade	"Low Grade" vs "High Grade"	-0.1305	0.036	0.04	0.9953
ADD2_AT_53903	ADD2	ENSG00000075340	chr2 | -	AT	NA	NA	18.2	BLCA	neoplasm_histologic_grade	"Low Grade" vs "High Grade"	0.1845	0.00586	0.00834	0.9953
ADNP_AP_59788	ADNP	ENSG00000101126	chr20 | -	AP	NA	NA	1	BLCA	neoplasm_histologic_grade	"Low Grade" vs "High Grade"	-0.24	0.024	0.027	0.9506
ADNP_AP_59790	ADNP	ENSG00000101126	chr20 | -	AP	NA	NA	4.1	BLCA	neoplasm_histologic_grade	"Low Grade" vs "High Grade"	0.1178	0.042	0.047	0.9506
AFMID_ES_43804	AFMID	ENSG00000183077	chr17 | +	ES	6	12	7:8:9:10:11.1	BLCA	neoplasm_histologic_grade	"Low Grade" vs "High Grade"	0.1172	0.04	0.044	0.9953
AFMID_ES_43823	AFMID	ENSG00000183077	chr17 | +	ES	2	13	5:6:7:8:9:10:11.1:12	BLCA	neoplasm_histologic_grade	"Low Grade" vs "High Grade"	0.1406	0.015	0.018	0.9435
AGAP8_AP_11527	AGAP8	ENSG00000174194	chr10 | -	AP	NA	NA	2.1	BLCA	neoplasm_histologic_grade	"Low Grade" vs "High Grade"	0.1251	0.00331	0.00519	0.9788
AGAP8_AP_11528	AGAP8	ENSG00000174194	chr10 | -	AP	NA	NA	1	BLCA	neoplasm_histologic_grade	"Low Grade" vs "High Grade"	-0.1251	0.00331	0.00519	0.9788
AHI1_ES_77894	AHI1	ENSG00000135541	chr6 | -	ES	30.1	33	1 day, 7:32:00	BLCA	neoplasm_histologic_grade	"Low Grade" vs "High Grade"	0.206	0.00103	0.00211	0.9576
AIFM1_AP_90067	AIFM1	ENSG00000156709	chrX | -	AP	NA	NA	1	BLCA	neoplasm_histologic_grade	"Low Grade" vs "High Grade"	-0.1722	0.000853	0.00187	1
AIFM1_AP_90068	AIFM1	ENSG00000156709	chrX | -	AP	NA	NA	11.1	BLCA	neoplasm_histologic_grade	"Low Grade" vs "High Grade"	0.1722	0.000853	0.00187	1
AIG1_AT_77972	AIG1	ENSG00000146416	chr6 | +	AT	NA	NA	10	BLCA	neoplasm_histologic_grade	"Low Grade" vs "High Grade"	0.1348	3.02e-08	1.48e-06	1
AK9_AT_77203	AK9	ENSG00000155085	chr6 | -	AT	NA	NA	12.2	BLCA	neoplasm_histologic_grade	"Low Grade" vs "High Grade"	-0.2364	1.24e-06	1.69e-05	1
AK9_AT_77205	AK9	ENSG00000155085	chr6 | -	AT	NA	NA	41	BLCA	neoplasm_histologic_grade	"Low Grade" vs "High Grade"	0.1667	4.25e-07	9.84e-06	1
AKAP10_ES_39785	AKAP10	ENSG00000108599	chr17 | -	ES	2	4.1	3	BLCA	neoplasm_histologic_grade	"Low Grade" vs "High Grade"	0.1754	0.00925	0.012	0.9976
AKT1S1_AP_51108	AKT1S1	ENSG00000204673	chr19 | -	AP	NA	NA	3.1	BLCA	neoplasm_histologic_grade	"Low Grade" vs "High Grade"	0.1539	1.38e-06	1.77e-05	1
AKT1S1_AP_51110	AKT1S1	ENSG00000204673	chr19 | -	AP	NA	NA	1.1	BLCA	neoplasm_histologic_grade	"Low Grade" vs "High Grade"	-0.2041	1.07e-05	7.72e-05	1
AKT3_AT_10463	AKT3	ENSG00000117020	chr1 | -	AT	NA	NA	15	BLCA	neoplasm_histologic_grade	"Low Grade" vs "High Grade"	-0.2252	5.38e-05	0.000239	1
AKT3_AT_10464	AKT3	ENSG00000117020	chr1 | -	AT	NA	NA	16.2	BLCA	neoplasm_histologic_grade	"Low Grade" vs "High Grade"	0.1817	5.13e-05	0.000232	1
ALDH6A1_AP_28366	ALDH6A1	ENSG00000119711	chr14 | -	AP	NA	NA	1	BLCA	neoplasm_histologic_grade	"Low Grade" vs "High Grade"	-0.1479	0.016	0.02	1
ALDH6A1_AP_28367	ALDH6A1	ENSG00000119711	chr14 | -	AP	NA	NA	7.1	BLCA	neoplasm_histologic_grade	"Low Grade" vs "High Grade"	0.1479	0.016	0.02	1
ALG13_AT_89905	ALG13	ENSG00000101901	chrX | +	AT	NA	NA	4	BLCA	neoplasm_histologic_grade	"Low Grade" vs "High Grade"	-0.1787	2.24e-05	0.000129	1
ALG13_AT_89906	ALG13	ENSG00000101901	chrX | +	AT	NA	NA	28	BLCA	neoplasm_histologic_grade	"Low Grade" vs "High Grade"	0.1787	2.24e-05	0.000129	1
ALKBH6_RI_49326	ALKBH6	ENSG00000239382	chr19 | -	RI	1.1	1.3	1.2	BLCA	neoplasm_histologic_grade	"Low Grade" vs "High Grade"	0.1228	0.037	0.042	0.9812
AMPD2_AP_4047	AMPD2	ENSG00000116337	chr1 | +	AP	NA	NA	1	BLCA	neoplasm_histologic_grade	"Low Grade" vs "High Grade"	-0.1181	0.00455	0.00673	0.9835
AMZ2_AP_43127	AMZ2	ENSG00000196704	chr17 | +	AP	NA	NA	3.1	BLCA	neoplasm_histologic_grade	"Low Grade" vs "High Grade"	0.1026	0.018	0.022	0.9882
ANGEL1_AP_28557	ANGEL1	ENSG00000013523	chr14 | -	AP	NA	NA	1	BLCA	neoplasm_histologic_grade	"Low Grade" vs "High Grade"	-0.1442	0.011	0.014	0.9576
ANGEL1_AP_28558	ANGEL1	ENSG00000013523	chr14 | -	AP	NA	NA	7.1	BLCA	neoplasm_histologic_grade	"Low Grade" vs "High Grade"	0.1442	0.011	0.014	0.9576
ANGEL2_AP_9775	ANGEL2	ENSG00000174606	chr1 | -	AP	NA	NA	1	BLCA	neoplasm_histologic_grade	"Low Grade" vs "High Grade"	-0.1621	0.00141	0.00265	0.9812
ANGEL2_AP_9776	ANGEL2	ENSG00000174606	chr1 | -	AP	NA	NA	2	BLCA	neoplasm_histologic_grade	"Low Grade" vs "High Grade"	0.1621	0.00141	0.00265	0.9812
ANKHD1_AT_73653	ANKHD1	ENSG00000131503	chr5 | +	AT	NA	NA	38	BLCA	neoplasm_histologic_grade	"Low Grade" vs "High Grade"	0.1567	4.28e-08	1.97e-06	1
ANKLE2_AP_25295	ANKLE2	ENSG00000176915	chr12 | -	AP	NA	NA	1.1	BLCA	neoplasm_histologic_grade	"Low Grade" vs "High Grade"	-0.1756	0.012	0.015	0.9929
ANKLE2_AP_25296	ANKLE2	ENSG00000176915	chr12 | -	AP	NA	NA	11.1	BLCA	neoplasm_histologic_grade	"Low Grade" vs "High Grade"	0.1756	0.012	0.015	0.9929
ANKLE2_RI_25300	ANKLE2	ENSG00000176915	chr12 | -	RI	1.1	1.3	1.2	BLCA	neoplasm_histologic_grade	"Low Grade" vs "High Grade"	0.1622	0.00436	0.00649	1
ANKRD13D_AP_17155	ANKRD13D	ENSG00000172932	chr11 | +	AP	NA	NA	1	BLCA	neoplasm_histologic_grade	"Low Grade" vs "High Grade"	-0.1173	0.00088	0.0019	1
ANKRD13D_AP_17156	ANKRD13D	ENSG00000172932	chr11 | +	AP	NA	NA	11.1	BLCA	neoplasm_histologic_grade	"Low Grade" vs "High Grade"	0.1173	0.00088	0.0019	1
ANKRD18A_AT_86459	ANKRD18A	ENSG00000180071	chr9 | -	AT	NA	NA	22	BLCA	neoplasm_histologic_grade	"Low Grade" vs "High Grade"	0.1613	9.25e-07	1.43e-05	0.9741
ANKRD18A_AT_86460	ANKRD18A	ENSG00000180071	chr9 | -	AT	NA	NA	17.2	BLCA	neoplasm_histologic_grade	"Low Grade" vs "High Grade"	-0.1613	9.25e-07	1.43e-05	0.9741
ANKRD42_AT_18050	ANKRD42	ENSG00000137494	chr11 | +	AT	NA	NA	6.2	BLCA	neoplasm_histologic_grade	"Low Grade" vs "High Grade"	-0.1436	0.000162	0.000539	1
ANKRD44_AT_56670	ANKRD44	ENSG00000065413	chr2 | -	AT	NA	NA	27	BLCA	neoplasm_histologic_grade	"Low Grade" vs "High Grade"	0.1438	0.039	0.043	0.9482
ANKRD49_AD_18345	ANKRD49	ENSG00000168876	chr11 | +	AD	2.4	2.8	2.5:2.6	BLCA	neoplasm_histologic_grade	"Low Grade" vs "High Grade"	0.1442	0.00199	0.00349	0.92
ANKRD49_AD_18352	ANKRD49	ENSG00000168876	chr11 | +	AD	2.2	2.8	2.3:2.4:2.5:2.6	BLCA	neoplasm_histologic_grade	"Low Grade" vs "High Grade"	0.2366	0.00716	0.00986	0.9624
ANKRD49_RI_18344	ANKRD49	ENSG00000168876	chr11 | +	RI	2.4	2.8	2.5:2.6:2.7	BLCA	neoplasm_histologic_grade	"Low Grade" vs "High Grade"	0.199	7.57e-05	0.000307	0.84
ANKRD49_RI_18350	ANKRD49	ENSG00000168876	chr11 | +	RI	2.2	2.8	2.3:2.4:2.5:2.6:2.7	BLCA	neoplasm_histologic_grade	"Low Grade" vs "High Grade"	0.3186	2.09e-06	2.5e-05	0.9365
ANXA8L2_ES_11459	ANXA8L2	ENSG00000186807	chr10 | +	ES	4	7	5	BLCA	neoplasm_histologic_grade	"Low Grade" vs "High Grade"	0.1018	0.00226	0.0038	0.8
AP1S2_AT_88569	AP1S2	ENSG00000182287	chrX | -	AT	NA	NA	5.2	BLCA	neoplasm_histologic_grade	"Low Grade" vs "High Grade"	0.1486	0.017	0.02	1
AP1S2_AT_88571	AP1S2	ENSG00000182287	chrX | -	AT	NA	NA	6	BLCA	neoplasm_histologic_grade	"Low Grade" vs "High Grade"	-0.1486	0.017	0.02	1
AP1S3_AT_57757	AP1S3	ENSG00000152056	chr2 | -	AT	NA	NA	8	BLCA	neoplasm_histologic_grade	"Low Grade" vs "High Grade"	0.117	0.000153	0.000525	1
AP1S3_AT_57760	AP1S3	ENSG00000152056	chr2 | -	AT	NA	NA	7	BLCA	neoplasm_histologic_grade	"Low Grade" vs "High Grade"	-0.1156	0.000237	0.000722	1
APOBEC3F_AT_62275	APOBEC3F	ENSG00000128394	chr22 | +	AT	NA	NA	8	BLCA	neoplasm_histologic_grade	"Low Grade" vs "High Grade"	-0.1848	0.00021	0.000658	1
APOBEC3F_AT_62276	APOBEC3F	ENSG00000128394	chr22 | +	AT	NA	NA	3	BLCA	neoplasm_histologic_grade	"Low Grade" vs "High Grade"	0.1848	0.00021	0.000658	1
APOC2_RI_50375	APOC2	ENSG00000234906	chr19 | +	RI	4.3	4.5	4.4	BLCA	neoplasm_histologic_grade	"Low Grade" vs "High Grade"	0.3042	6.8e-06	5.74e-05	0.9906
APOD_ES_68181	APOD	ENSG00000189058	chr3 | -	ES	2	4	3	BLCA	neoplasm_histologic_grade	"Low Grade" vs "High Grade"	0.1113	0.021	0.025	0.9906
APOO_AA_88702	APOO	ENSG00000184831	chrX | -	AA	8	9.2	9.1	BLCA	neoplasm_histologic_grade	"Low Grade" vs "High Grade"	-0.1276	0.000476	0.00118	1
APPL2_AP_24126	APPL2	ENSG00000136044	chr12 | -	AP	NA	NA	1	BLCA	neoplasm_histologic_grade	"Low Grade" vs "High Grade"	-0.2217	0.00155	0.00285	0.96
APPL2_AP_24127	APPL2	ENSG00000136044	chr12 | -	AP	NA	NA	21.1	BLCA	neoplasm_histologic_grade	"Low Grade" vs "High Grade"	0.2621	7.41e-05	0.000302	0.96
APTX_ES_86084	APTX	ENSG00000137074	chr9 | -	ES	5.2	7.4	6.1:6.2:7.1:7.2:7.3	BLCA	neoplasm_histologic_grade	"Low Grade" vs "High Grade"	0.1178	0.00147	0.00275	0.9765
ARAP1_ES_17641	ARAP1	ENSG00000186635	chr11 | -	ES	31	33	32	BLCA	neoplasm_histologic_grade	"Low Grade" vs "High Grade"	0.1105	0.00376	0.00577	1
ARFGAP1_ES_60111	ARFGAP1	ENSG00000101199	chr20 | +	ES	12	14.1	13	BLCA	neoplasm_histologic_grade	"Low Grade" vs "High Grade"	0.107	0.013	0.016	0.9953
ARGLU1_ES_26233	ARGLU1	ENSG00000134884	chr13 | -	ES	3	5	4	BLCA	neoplasm_histologic_grade	"Low Grade" vs "High Grade"	0.1912	0.00532	0.00766	0.9976
ARHGAP17_ES_35664	ARHGAP17	ENSG00000140750	chr16 | -	ES	17	19	18	BLCA	neoplasm_histologic_grade	"Low Grade" vs "High Grade"	-0.142	0.00088	0.0019	0.9882
ARHGAP28_AP_44554	ARHGAP28	ENSG00000088756	chr18 | +	AP	NA	NA	2	BLCA	neoplasm_histologic_grade	"Low Grade" vs "High Grade"	0.2401	0.00199	0.00348	1
ARHGAP28_AP_44558	ARHGAP28	ENSG00000088756	chr18 | +	AP	NA	NA	1	BLCA	neoplasm_histologic_grade	"Low Grade" vs "High Grade"	-0.2401	0.00115	0.00228	1
ARHGAP28_AT_44559	ARHGAP28	ENSG00000088756	chr18 | +	AT	NA	NA	22	BLCA	neoplasm_histologic_grade	"Low Grade" vs "High Grade"	0.1044	0.012	0.015	0.9741
ARHGAP28_AT_44561	ARHGAP28	ENSG00000088756	chr18 | +	AT	NA	NA	20	BLCA	neoplasm_histologic_grade	"Low Grade" vs "High Grade"	-0.1044	0.012	0.015	0.9741
ARHGAP32_RI_19451	ARHGAP32	ENSG00000134909	chr11 | -	RI	21.3	21.5	21.4	BLCA	neoplasm_histologic_grade	"Low Grade" vs "High Grade"	0.2384	0.028	0.032	0.9388
ARHGEF1_ES_50100	ARHGEF1	ENSG00000076928	chr19 | +	ES	28	30	29	BLCA	neoplasm_histologic_grade	"Low Grade" vs "High Grade"	-0.1006	2.73e-07	6.89e-06	1
ARHGEF16_AP_307	ARHGEF16	ENSG00000130762	chr1 | +	AP	NA	NA	1	BLCA	neoplasm_histologic_grade	"Low Grade" vs "High Grade"	-0.1178	0.029	0.033	0.7882
ARHGEF16_AP_310	ARHGEF16	ENSG00000130762	chr1 | +	AP	NA	NA	7	BLCA	neoplasm_histologic_grade	"Low Grade" vs "High Grade"	0.1339	0.00579	0.00826	0.7882
ARHGEF39_AP_86268	ARHGEF39	ENSG00000137135	chr9 | -	AP	NA	NA	1	BLCA	neoplasm_histologic_grade	"Low Grade" vs "High Grade"	0.254	6.69e-07	1.27e-05	1
ARHGEF39_AP_86269	ARHGEF39	ENSG00000137135	chr9 | -	AP	NA	NA	3	BLCA	neoplasm_histologic_grade	"Low Grade" vs "High Grade"	-0.254	6.69e-07	1.27e-05	1
ARHGEF6_ES_90216	ARHGEF6	ENSG00000129675	chrX | -	ES	7	9	8	BLCA	neoplasm_histologic_grade	"Low Grade" vs "High Grade"	0.1828	0.027	0.032	0.9059
ARIH2_AP_64784	ARIH2	ENSG00000177479	chr3 | +	AP	NA	NA	1	BLCA	neoplasm_histologic_grade	"Low Grade" vs "High Grade"	-0.2092	8.19e-07	1.37e-05	0.9976
ARIH2_AP_64785	ARIH2	ENSG00000177479	chr3 | +	AP	NA	NA	4.1	BLCA	neoplasm_histologic_grade	"Low Grade" vs "High Grade"	0.2092	8.19e-07	1.37e-05	0.9976
ARMC6_AD_48582	ARMC6	ENSG00000105676	chr19 | +	AD	1.1	5	1.2	BLCA	neoplasm_histologic_grade	"Low Grade" vs "High Grade"	-0.1187	4.75e-05	0.000222	0.9859
ARMCX4_AT_89646	ARMCX4	ENSG00000196440	chrX | +	AT	NA	NA	10.2	BLCA	neoplasm_histologic_grade	"Low Grade" vs "High Grade"	-0.2192	0.000111	0.000419	0.9976
ARMCX4_AT_89649	ARMCX4	ENSG00000196440	chrX | +	AT	NA	NA	18.3	BLCA	neoplasm_histologic_grade	"Low Grade" vs "High Grade"	0.2318	0.0002	0.00064	0.9976
ARRDC1_RI_88335	ARRDC1	ENSG00000197070	chr9 | +	RI	2.1	2.3	2.2	BLCA	neoplasm_histologic_grade	"Low Grade" vs "High Grade"	0.1004	0.00197	0.00347	1
ARSK_AT_72806	ARSK	ENSG00000164291	chr5 | +	AT	NA	NA	11	BLCA	neoplasm_histologic_grade	"Low Grade" vs "High Grade"	-0.1083	0.000927	0.00196	1
ARSK_AT_72807	ARSK	ENSG00000164291	chr5 | +	AT	NA	NA	2	BLCA	neoplasm_histologic_grade	"Low Grade" vs "High Grade"	0.1083	0.000927	0.00196	1
ARTN_AP_2483	ARTN	ENSG00000117407	chr1 | +	AP	NA	NA	4.1	BLCA	neoplasm_histologic_grade	"Low Grade" vs "High Grade"	0.1525	0.000763	0.00171	0.9247
ARTN_AP_2486	ARTN	ENSG00000117407	chr1 | +	AP	NA	NA	1	BLCA	neoplasm_histologic_grade	"Low Grade" vs "High Grade"	-0.1034	0.014	0.018	0.9247
ASCC1_AP_12075	ASCC1	ENSG00000138303	chr10 | -	AP	NA	NA	2	BLCA	neoplasm_histologic_grade	"Low Grade" vs "High Grade"	-0.1239	0.00181	0.00321	0.9859
ASNS_AA_80562	ASNS	ENSG00000070669	chr7 | -	AA	10	11.2	11.1	BLCA	neoplasm_histologic_grade	"Low Grade" vs "High Grade"	0.1252	3.1e-06	3.24e-05	0.9953
ASNS_ES_80575	ASNS	ENSG00000070669	chr7 | -	ES	1	3	2.3	BLCA	neoplasm_histologic_grade	"Low Grade" vs "High Grade"	0.2992	8.01e-07	1.37e-05	0.9247
ASTN2_AT_87368	ASTN2	ENSG00000148219	chr9 | -	AT	NA	NA	25.3	BLCA	neoplasm_histologic_grade	"Low Grade" vs "High Grade"	0.1238	0.02	0.023	1
ASTN2_AT_87369	ASTN2	ENSG00000148219	chr9 | -	AT	NA	NA	21	BLCA	neoplasm_histologic_grade	"Low Grade" vs "High Grade"	-0.1238	0.02	0.023	1
ATAD3A_AA_176	ATAD3A	ENSG00000197785	chr1 | +	AA	3	4.2	4.1	BLCA	neoplasm_histologic_grade	"Low Grade" vs "High Grade"	0.2355	2.36e-05	0.000134	0.9953
ATF3_AA_9737	ATF3	ENSG00000162772	chr1 | +	AA	4	5.3	5.1:5.2	BLCA	neoplasm_histologic_grade	"Low Grade" vs "High Grade"	0.1747	2.54e-05	0.000141	0.9765
ATF5_AP_51133	ATF5	ENSG00000169136	chr19 | +	AP	NA	NA	2.1	BLCA	neoplasm_histologic_grade	"Low Grade" vs "High Grade"	0.1216	0.01	0.014	0.9976
ATF5_AP_51134	ATF5	ENSG00000169136	chr19 | +	AP	NA	NA	1	BLCA	neoplasm_histologic_grade	"Low Grade" vs "High Grade"	-0.1216	0.01	0.014	0.9976
ATG16L2_AD_17651	ATG16L2	ENSG00000168010	chr11 | +	AD	6.3	7	6.4	BLCA	neoplasm_histologic_grade	"Low Grade" vs "High Grade"	0.1087	0.00347	0.00541	0.9929
ATG4B_ES_58402	ATG4B	ENSG00000168397	chr2 | +	ES	3	5	4	BLCA	neoplasm_histologic_grade	"Low Grade" vs "High Grade"	0.1361	0.00013	0.00047	0.8118
ATL2_ES_53248	ATL2	ENSG00000119787	chr2 | -	ES	15	17.2	00:16:17.100000	BLCA	neoplasm_histologic_grade	"Low Grade" vs "High Grade"	0.1533	0.00433	0.00646	0.9976
ATL2_ES_53255	ATL2	ENSG00000119787	chr2 | -	ES	1	5	3	BLCA	neoplasm_histologic_grade	"Low Grade" vs "High Grade"	0.2736	0.000152	0.000524	1
ATP5D_RI_46401	ATP5D	ENSG00000099624	chr19 | +	RI	4.1	4.4	4.2:4.3	BLCA	neoplasm_histologic_grade	"Low Grade" vs "High Grade"	-0.117	0.000839	0.00185	1
ATP5G3_RI_56093	ATP5G3	ENSG00000154518	chr2 | -	RI	1.1	1.3	1.2	BLCA	neoplasm_histologic_grade	"Low Grade" vs "High Grade"	0.1062	0.00755	0.01	0.9553
ATP5SL_ES_50073	ATP5SL	ENSG00000105341	chr19 | -	ES	5	7	6.1	BLCA	neoplasm_histologic_grade	"Low Grade" vs "High Grade"	0.1042	0.00108	0.00217	1
ATP6V0B_ES_2510	ATP6V0B	ENSG00000117410	chr1 | +	ES	1.1	3.2	2.1:2.2	BLCA	neoplasm_histologic_grade	"Low Grade" vs "High Grade"	0.1831	6.02e-06	5.27e-05	0.9953
ATP8B2_AT_7832	ATP8B2	ENSG00000143515	chr1 | +	AT	NA	NA	31	BLCA	neoplasm_histologic_grade	"Low Grade" vs "High Grade"	-0.1635	1.38e-06	1.77e-05	1
ATP8B2_AT_7833	ATP8B2	ENSG00000143515	chr1 | +	AT	NA	NA	16	BLCA	neoplasm_histologic_grade	"Low Grade" vs "High Grade"	0.1705	1.08e-06	1.58e-05	1
ATXN7L1_AT_81310	ATXN7L1	ENSG00000146776	chr7 | -	AT	NA	NA	17.2	BLCA	neoplasm_histologic_grade	"Low Grade" vs "High Grade"	0.1306	0.000451	0.00114	1
AURKAIP1_RI_148	AURKAIP1	ENSG00000175756	chr1 | -	RI	1.2	1.5	1.3:1.4	BLCA	neoplasm_histologic_grade	"Low Grade" vs "High Grade"	-0.1014	0.017	0.021	0.9929
BAIAP2_ES_44096	BAIAP2	ENSG00000175866	chr17 | +	ES	16.1	18.1	17.1	BLCA	neoplasm_histologic_grade	"Low Grade" vs "High Grade"	0.1116	0.00612	0.00864	0.9482
BCL7B_ES_79959	BCL7B	ENSG00000106635	chr7 | -	ES	1	3	2	BLCA	neoplasm_histologic_grade	"Low Grade" vs "High Grade"	0.1044	0.00175	0.00314	1
BCS1L_AD_57544	BCS1L	ENSG00000074582	chr2 | +	AD	1.1	2	1.2:1.3:1.4:1.5:1.6:1.7:1.8	BLCA	neoplasm_histologic_grade	"Low Grade" vs "High Grade"	0.2764	0.000274	0.000802	0.9765
BICD1_AT_21019	BICD1	ENSG00000151746	chr12 | +	AT	NA	NA	10	BLCA	neoplasm_histologic_grade	"Low Grade" vs "High Grade"	0.2178	0.00779	0.011	1
BICD1_AT_21020	BICD1	ENSG00000151746	chr12 | +	AT	NA	NA	1.5	BLCA	neoplasm_histologic_grade	"Low Grade" vs "High Grade"	-0.2102	0.011	0.014	1
BMP1_ES_82988	BMP1	ENSG00000168487	chr8 | +	ES	16	18.1	17.1:17.2	BLCA	neoplasm_histologic_grade	"Low Grade" vs "High Grade"	0.1232	0.000118	0.000433	0.9906
BMP1_ES_82990	BMP1	ENSG00000168487	chr8 | +	ES	16	18.2	17.1:17.2:18.1	BLCA	neoplasm_histologic_grade	"Low Grade" vs "High Grade"	0.1633	8.8e-05	0.00034	0.9976
BMP8B_AT_1911	BMP8B	ENSG00000116985	chr1 | -	AT	NA	NA	6.2	BLCA	neoplasm_histologic_grade	"Low Grade" vs "High Grade"	0.237	5.08e-05	0.000232	1
BMP8B_AT_1912	BMP8B	ENSG00000116985	chr1 | -	AT	NA	NA	8	BLCA	neoplasm_histologic_grade	"Low Grade" vs "High Grade"	-0.237	5.08e-05	0.000232	1
BRD4_AT_48066	BRD4	ENSG00000141867	chr19 | -	AT	NA	NA	15	BLCA	neoplasm_histologic_grade	"Low Grade" vs "High Grade"	-0.1023	2.43e-07	6.62e-06	1
BRF1_AP_29605	BRF1	ENSG00000185024	chr14 | -	AP	NA	NA	13.1	BLCA	neoplasm_histologic_grade	"Low Grade" vs "High Grade"	0.1018	0.0092	0.012	0.9976
BROX_AP_9894	BROX	ENSG00000162819	chr1 | +	AP	NA	NA	2	BLCA	neoplasm_histologic_grade	"Low Grade" vs "High Grade"	-0.1303	0.038	0.042	0.9812
BROX_AP_9895	BROX	ENSG00000162819	chr1 | +	AP	NA	NA	1	BLCA	neoplasm_histologic_grade	"Low Grade" vs "High Grade"	0.1303	0.038	0.042	0.9812
BTBD8_AT_3753	BTBD8	ENSG00000189195	chr1 | +	AT	NA	NA	9	BLCA	neoplasm_histologic_grade	"Low Grade" vs "High Grade"	-0.1535	0.029	0.033	0.8518
BTBD8_AT_3754	BTBD8	ENSG00000189195	chr1 | +	AT	NA	NA	6.2	BLCA	neoplasm_histologic_grade	"Low Grade" vs "High Grade"	0.1535	0.029	0.033	0.8518
BTN2A1_AA_75670	BTN2A1	ENSG00000112763	chr6 | +	AA	8	9.2	9.1	BLCA	neoplasm_histologic_grade	"Low Grade" vs "High Grade"	0.1736	0.000985	0.00205	0.9929
BTN2A1_ES_75671	BTN2A1	ENSG00000112763	chr6 | +	ES	3	5	4	BLCA	neoplasm_histologic_grade	"Low Grade" vs "High Grade"	0.1956	1.32e-06	1.71e-05	0.96
BUB3_AA_13390	BUB3	ENSG00000154473	chr10 | +	AA	7	8.2	8.1	BLCA	neoplasm_histologic_grade	"Low Grade" vs "High Grade"	-0.1175	0.000264	0.000784	1
C11orf48_RI_16388	C11orf48	ENSG00000162194	chr11 | -	RI	1.5	1.7	1.6	BLCA	neoplasm_histologic_grade	"Low Grade" vs "High Grade"	0.1178	0.00446	0.00662	0.9106
C11orf57_RI_18723	C11orf57	ENSG00000150776	chr11 | +	RI	4.1	4.3	4.2	BLCA	neoplasm_histologic_grade	"Low Grade" vs "High Grade"	0.1568	0.000753	0.00169	1
C11orf80_ES_17129	C11orf80	ENSG00000173715	chr11 | +	ES	1	4	02:03:00	BLCA	neoplasm_histologic_grade	"Low Grade" vs "High Grade"	0.1422	1.37e-05	9.08e-05	0.9976
C12orf23_ES_24179	C12orf23	ENSG00000151135	chr12 | +	ES	4.2	6	5	BLCA	neoplasm_histologic_grade	"Low Grade" vs "High Grade"	0.1799	0.014	0.017	0.9953
C12orf43_ES_24819	C12orf43	ENSG00000157895	chr12 | -	ES	1	3.1	2	BLCA	neoplasm_histologic_grade	"Low Grade" vs "High Grade"	0.1086	0.00755	0.01	1
C12orf65_AP_25058	C12orf65	ENSG00000130921	chr12 | +	AP	NA	NA	2	BLCA	neoplasm_histologic_grade	"Low Grade" vs "High Grade"	-0.1602	5e-05	0.00023	0.9976
C12orf65_AP_25059	C12orf65	ENSG00000130921	chr12 | +	AP	NA	NA	3.1	BLCA	neoplasm_histologic_grade	"Low Grade" vs "High Grade"	0.3238	1.19e-05	8.27e-05	0.9976
C12orf65_AP_25060	C12orf65	ENSG00000130921	chr12 | +	AP	NA	NA	1	BLCA	neoplasm_histologic_grade	"Low Grade" vs "High Grade"	-0.1004	0.013	0.016	0.9976
C14orf2_ES_29531	C14orf2	ENSG00000156411	chr14 | -	ES	2	7.1	05:06:00	BLCA	neoplasm_histologic_grade	"Low Grade" vs "High Grade"	-0.1583	0.015	0.018	0.9529
C14orf2_ES_29533	C14orf2	ENSG00000156411	chr14 | -	ES	2	7.1	03:05:00	BLCA	neoplasm_histologic_grade	"Low Grade" vs "High Grade"	-0.1944	0.00728	0.00997	0.96
C14orf2_ME_29528	C14orf2	ENSG00000156411	chr14 | -	ME	2	5	3|4	BLCA	neoplasm_histologic_grade	"Low Grade" vs "High Grade"	-0.1185	0.00102	0.00211	0.9929
C16orf13_ES_32921	C16orf13	ENSG00000130731	chr16 | -	ES	1	5	02:03:00	BLCA	neoplasm_histologic_grade	"Low Grade" vs "High Grade"	0.108	2.71e-06	3.05e-05	1
C16orf13_ES_32923	C16orf13	ENSG00000130731	chr16 | -	ES	1	5	2	BLCA	neoplasm_histologic_grade	"Low Grade" vs "High Grade"	0.1983	0.000239	0.000727	0.9859
C16orf58_RI_36278	C16orf58	ENSG00000140688	chr16 | -	RI	8.2	8.4	8.3	BLCA	neoplasm_histologic_grade	"Low Grade" vs "High Grade"	0.1039	0.000153	0.000525	0.9976
C17orf70_AP_44127	C17orf70	ENSG00000185504	chr17 | -	AP	NA	NA	1	BLCA	neoplasm_histologic_grade	"Low Grade" vs "High Grade"	-0.1494	0.000319	0.000883	1
C17orf70_AP_44128	C17orf70	ENSG00000185504	chr17 | -	AP	NA	NA	5.1	BLCA	neoplasm_histologic_grade	"Low Grade" vs "High Grade"	0.1494	0.000319	0.000883	1
C19orf60_ES_48491	C19orf60	ENSG00000006015	chr19 | +	ES	2	4	3.2	BLCA	neoplasm_histologic_grade	"Low Grade" vs "High Grade"	0.1185	7.63e-06	6.29e-05	0.9953
C1orf63_ES_1145	C1orf63	ENSG00000117616	chr1 | -	ES	4.2	6.2	5.1:5.2:6.1	BLCA	neoplasm_histologic_grade	"Low Grade" vs "High Grade"	0.26	8.34e-05	0.000328	0.9953
C1orf63_ES_1147	C1orf63	ENSG00000117616	chr1 | -	ES	4.2	6.2	5.1:5.2:5.3	BLCA	neoplasm_histologic_grade	"Low Grade" vs "High Grade"	0.2664	3.34e-05	0.000173	0.9906
C21orf59_AA_60358	C21orf59	ENSG00000159079	chr21 | -	AA	5.1	5.5	5.3:5.4	BLCA	neoplasm_histologic_grade	"Low Grade" vs "High Grade"	0.1065	0.00247	0.00407	0.9906
C21orf59_AD_60359	C21orf59	ENSG00000159079	chr21 | -	AD	5.1	5.5	5.2:5.3	BLCA	neoplasm_histologic_grade	"Low Grade" vs "High Grade"	0.1558	0.012	0.016	0.9976
C4orf22_AT_69680	C4orf22	ENSG00000197826	chr4 | +	AT	NA	NA	9	BLCA	neoplasm_histologic_grade	"Low Grade" vs "High Grade"	0.4046	0.026	0.03	0.8988
C7orf10_AT_79305	C7orf10	NA	chrNA | NA	AT	NA	NA	16	BLCA	neoplasm_histologic_grade	"Low Grade" vs "High Grade"	-0.2146	6.81e-05	0.000283	1
C7orf10_AT_79306	C7orf10	NA	chrNA | NA	AT	NA	NA	7	BLCA	neoplasm_histologic_grade	"Low Grade" vs "High Grade"	0.2146	6.81e-05	0.000283	1
C7orf43_AP_80904	C7orf43	ENSG00000146826	chr7 | -	AP	NA	NA	1	BLCA	neoplasm_histologic_grade	"Low Grade" vs "High Grade"	-0.2013	1.03e-06	1.53e-05	0.9953
C7orf43_AP_80905	C7orf43	ENSG00000146826	chr7 | -	AP	NA	NA	2.1	BLCA	neoplasm_histologic_grade	"Low Grade" vs "High Grade"	0.2013	1.03e-06	1.53e-05	0.9953
C7orf49_AD_81878	C7orf49	ENSG00000122783	chr7 | -	AD	1.1	2.1	1.2	BLCA	neoplasm_histologic_grade	"Low Grade" vs "High Grade"	0.1197	2.18e-05	0.000129	1
C8orf82_RI_85632	C8orf82	ENSG00000213563	chr8 | -	RI	2.3	2.5	2.4	BLCA	neoplasm_histologic_grade	"Low Grade" vs "High Grade"	-0.1053	6.21e-06	5.41e-05	1
C9orf156_AP_87023	C9orf156	ENSG00000136932	chr9 | -	AP	NA	NA	1	BLCA	neoplasm_histologic_grade	"Low Grade" vs "High Grade"	-0.125	0.000281	0.000811	0.9741
C9orf156_AP_87024	C9orf156	ENSG00000136932	chr9 | -	AP	NA	NA	4.1	BLCA	neoplasm_histologic_grade	"Low Grade" vs "High Grade"	0.125	0.000281	0.000811	0.9741
C9orf9_AP_87992	C9orf9	ENSG00000165698	chr9 | +	AP	NA	NA	2	BLCA	neoplasm_histologic_grade	"Low Grade" vs "High Grade"	-0.2117	0.000424	0.00109	0.96
C9orf9_AP_87993	C9orf9	ENSG00000165698	chr9 | +	AP	NA	NA	1	BLCA	neoplasm_histologic_grade	"Low Grade" vs "High Grade"	0.2117	0.000424	0.00109	0.96
CACNA2D4_AT_19676	CACNA2D4	ENSG00000151062	chr12 | -	AT	NA	NA	40	BLCA	neoplasm_histologic_grade	"Low Grade" vs "High Grade"	0.1024	0.03	0.034	0.9929
CACNB3_ES_21480	CACNB3	ENSG00000167535	chr12 | +	ES	3	5	4	BLCA	neoplasm_histologic_grade	"Low Grade" vs "High Grade"	0.156	0.000339	0.00093	0.8729
CALCOCO2_ES_42231	CALCOCO2	ENSG00000136436	chr17 | +	ES	2	6	3	BLCA	neoplasm_histologic_grade	"Low Grade" vs "High Grade"	0.1756	0.000676	0.00155	1
CAMKK2_AP_24845	CAMKK2	ENSG00000110931	chr12 | -	AP	NA	NA	1	BLCA	neoplasm_histologic_grade	"Low Grade" vs "High Grade"	0.116	0.02	0.024	0.9976
CAMKK2_AP_24848	CAMKK2	ENSG00000110931	chr12 | -	AP	NA	NA	2	BLCA	neoplasm_histologic_grade	"Low Grade" vs "High Grade"	-0.2166	0.037	0.042	0.9976
CAPN10_ES_58280	CAPN10	ENSG00000142330	chr2 | +	ES	7	9	8	BLCA	neoplasm_histologic_grade	"Low Grade" vs "High Grade"	0.1281	0.0037	0.0057	1
CAPN12_AT_49690	CAPN12	ENSG00000182472	chr19 | -	AT	NA	NA	5	BLCA	neoplasm_histologic_grade	"Low Grade" vs "High Grade"	-0.1386	0.02	0.023	0.9647
CAPN12_AT_49691	CAPN12	ENSG00000182472	chr19 | -	AT	NA	NA	23	BLCA	neoplasm_histologic_grade	"Low Grade" vs "High Grade"	0.1386	0.02	0.023	0.9647
CAPN2_AP_9923	CAPN2	ENSG00000162909	chr1 | +	AP	NA	NA	2	BLCA	neoplasm_histologic_grade	"Low Grade" vs "High Grade"	-0.229	0.000383	0.00102	1
CAPN2_AP_9924	CAPN2	ENSG00000162909	chr1 | +	AP	NA	NA	1	BLCA	neoplasm_histologic_grade	"Low Grade" vs "High Grade"	0.229	0.000383	0.00102	1
CARKD_AA_26254	CARKD	ENSG00000213995	chr13 | +	AA	8	9.2	9.1	BLCA	neoplasm_histologic_grade	"Low Grade" vs "High Grade"	0.1292	0.000311	0.000872	0.9953
CARKD_RI_26255	CARKD	ENSG00000213995	chr13 | +	RI	7.3	7.5	7.4	BLCA	neoplasm_histologic_grade	"Low Grade" vs "High Grade"	0.1455	0.014	0.018	0.9953
CASP1_RI_18519	CASP1	ENSG00000137752	chr11 | -	RI	10.1	10.3	10.2	BLCA	neoplasm_histologic_grade	"Low Grade" vs "High Grade"	0.1309	0.00118	0.00231	0.9976
CBLB_ES_66001	CBLB	ENSG00000114423	chr3 | -	ES	18.2	19	18.4	BLCA	neoplasm_histologic_grade	"Low Grade" vs "High Grade"	-0.1226	0.000442	0.00113	0.9741
CBWD3_AT_86509	CBWD3	ENSG00000196873	chr9 | +	AT	NA	NA	19	BLCA	neoplasm_histologic_grade	"Low Grade" vs "High Grade"	0.199	4.85e-09	4.31e-07	1
CBWD3_AT_86510	CBWD3	ENSG00000196873	chr9 | +	AT	NA	NA	4.2	BLCA	neoplasm_histologic_grade	"Low Grade" vs "High Grade"	-0.199	4.85e-09	4.31e-07	1
CBWD5_AT_86497	CBWD5	ENSG00000147996	chr9 | -	AT	NA	NA	19	BLCA	neoplasm_histologic_grade	"Low Grade" vs "High Grade"	0.1026	0.00501	0.0073	1
CBWD6_AT_86488	CBWD6	ENSG00000204790	chr9 | -	AT	NA	NA	16	BLCA	neoplasm_histologic_grade	"Low Grade" vs "High Grade"	0.1909	1.23e-09	2.59e-07	1
CBWD6_AT_86489	CBWD6	ENSG00000204790	chr9 | -	AT	NA	NA	4.2	BLCA	neoplasm_histologic_grade	"Low Grade" vs "High Grade"	-0.1744	3.23e-09	4.11e-07	1
CBWD6_ES_86491	CBWD6	ENSG00000204790	chr9 | -	ES	5	7	6	BLCA	neoplasm_histologic_grade	"Low Grade" vs "High Grade"	-0.14	0.00133	0.00253	0.9576
CCDC141_AT_56396	CCDC141	ENSG00000163492	chr2 | -	AT	NA	NA	12.2	BLCA	neoplasm_histologic_grade	"Low Grade" vs "High Grade"	0.1485	0.021	0.024	0.9435
CCDC50_ES_68126	CCDC50	ENSG00000152492	chr3 | +	ES	5	7	6	BLCA	neoplasm_histologic_grade	"Low Grade" vs "High Grade"	0.1226	0.012	0.015	0.9976
CCDC53_ME_24021	CCDC53	ENSG00000120860	chr12 | -	ME	2	6	4|5	BLCA	neoplasm_histologic_grade	"Low Grade" vs "High Grade"	-0.1731	0.00712	0.00983	1
CCDC64B_AP_33364	CCDC64B	ENSG00000162069	chr16 | -	AP	NA	NA	3.1	BLCA	neoplasm_histologic_grade	"Low Grade" vs "High Grade"	0.1273	0.031	0.035	0.96
CCDC74A_RI_55387	CCDC74A	ENSG00000163040	chr2 | +	RI	4.1	4.3	4.2	BLCA	neoplasm_histologic_grade	"Low Grade" vs "High Grade"	0.1457	7.08e-05	0.000293	0.9459
CCDC84_AD_19052	CCDC84	ENSG00000186166	chr11 | +	AD	6.1	7	6.2	BLCA	neoplasm_histologic_grade	"Low Grade" vs "High Grade"	0.1306	0.00223	0.00378	0.9976
CCDC92_AA_25123	CCDC92	ENSG00000119242	chr12 | -	AA	1	2.4	2.2:2.3	BLCA	neoplasm_histologic_grade	"Low Grade" vs "High Grade"	0.1079	0.041	0.046	0.7788
CCDC92_AP_25120	CCDC92	ENSG00000119242	chr12 | -	AP	NA	NA	2.1	BLCA	neoplasm_histologic_grade	"Low Grade" vs "High Grade"	0.1246	0.00261	0.00426	0.9812
CCDC92_AP_25121	CCDC92	ENSG00000119242	chr12 | -	AP	NA	NA	1	BLCA	neoplasm_histologic_grade	"Low Grade" vs "High Grade"	-0.1246	0.00261	0.00426	0.9812
CCL28_AT_71946	CCL28	ENSG00000151882	chr5 | -	AT	NA	NA	6	BLCA	neoplasm_histologic_grade	"Low Grade" vs "High Grade"	0.1019	0.00375	0.00576	1
CCL28_AT_71947	CCL28	ENSG00000151882	chr5 | -	AT	NA	NA	5.2	BLCA	neoplasm_histologic_grade	"Low Grade" vs "High Grade"	-0.1019	0.00375	0.00576	1
CCND3_AP_76154	CCND3	ENSG00000112576	chr6 | -	AP	NA	NA	3.1	BLCA	neoplasm_histologic_grade	"Low Grade" vs "High Grade"	-0.172	0.00119	0.00232	1
CCND3_AP_76156	CCND3	ENSG00000112576	chr6 | -	AP	NA	NA	2	BLCA	neoplasm_histologic_grade	"Low Grade" vs "High Grade"	0.1612	0.00954	0.013	1
CCNDBP1_RI_30218	CCNDBP1	ENSG00000166946	chr15 | +	RI	10.1	10.3	10.2	BLCA	neoplasm_histologic_grade	"Low Grade" vs "High Grade"	0.1476	0.042	0.047	0.9576
CCRL2_AP_64450	CCRL2	ENSG00000121797	chr3 | +	AP	NA	NA	3.1	BLCA	neoplasm_histologic_grade	"Low Grade" vs "High Grade"	0.1135	0.000508	0.00125	0.8588
CCSER1_AT_69945	CCSER1	ENSG00000184305	chr4 | +	AT	NA	NA	22	BLCA	neoplasm_histologic_grade	"Low Grade" vs "High Grade"	0.2172	0.00476	0.00699	0.8212
CCT3_ES_8239	CCT3	ENSG00000163468	chr1 | -	ES	1	4	3	BLCA	neoplasm_histologic_grade	"Low Grade" vs "High Grade"	0.1233	5.32e-05	0.000238	1
CD33_AT_51313	CD33	ENSG00000105383	chr19 | +	AT	NA	NA	7	BLCA	neoplasm_histologic_grade	"Low Grade" vs "High Grade"	-0.2734	3.77e-06	3.7e-05	1
CD33_AT_51314	CD33	ENSG00000105383	chr19 | +	AT	NA	NA	6.3	BLCA	neoplasm_histologic_grade	"Low Grade" vs "High Grade"	0.2734	3.77e-06	3.7e-05	1
CD44_ES_15111	CD44	ENSG00000026508	chr11 | +	ES	5	12.1	6:7:8:9.1:9.2:10:11	BLCA	neoplasm_histologic_grade	"Low Grade" vs "High Grade"	0.261	7.34e-05	0.0003	0.9082
CD44_ES_15112	CD44	ENSG00000026508	chr11 | +	ES	5	12.1	7:8:9.1:9.2:10:11	BLCA	neoplasm_histologic_grade	"Low Grade" vs "High Grade"	0.1183	3.42e-05	0.000176	0.9294
CD44_ES_15114	CD44	ENSG00000026508	chr11 | +	ES	5	12.1	6:7:8:9.2:10:11	BLCA	neoplasm_histologic_grade	"Low Grade" vs "High Grade"	0.289	5.92e-05	0.000256	0.8753
CD44_ES_15115	CD44	ENSG00000026508	chr11 | +	ES	5	12.1	7:8:9.2:10:11	BLCA	neoplasm_histologic_grade	"Low Grade" vs "High Grade"	0.1537	1.04e-05	7.68e-05	0.9012
CD44_ES_15127	CD44	ENSG00000026508	chr11 | +	ES	5	15	6:7:8:9.1:9.2:10:11:12.1:13:14	BLCA	neoplasm_histologic_grade	"Low Grade" vs "High Grade"	0.3552	4.07e-06	3.87e-05	0.9859
CD44_ES_15128	CD44	ENSG00000026508	chr11 | +	ES	5	15	7:8:9.1:9.2:10:11:12.1:13:14	BLCA	neoplasm_histologic_grade	"Low Grade" vs "High Grade"	0.3355	2.96e-06	3.16e-05	0.9906
CD44_ES_15130	CD44	ENSG00000026508	chr11 | +	ES	5	15	6:7:8:9.2:10:11:12.1:13:14	BLCA	neoplasm_histologic_grade	"Low Grade" vs "High Grade"	0.3981	5.84e-06	5.16e-05	0.9812
CD44_ES_15131	CD44	ENSG00000026508	chr11 | +	ES	5	15	7:8:9.2:10:11:12.1:13:14	BLCA	neoplasm_histologic_grade	"Low Grade" vs "High Grade"	0.3685	3.72e-06	3.7e-05	0.9835
CD46_ES_9662	CD46	ENSG00000117335	chr1 | +	ES	6	9	07:08:00	BLCA	neoplasm_histologic_grade	"Low Grade" vs "High Grade"	0.1532	0.00738	0.01	0.9671
CD47_ES_66013	CD47	ENSG00000196776	chr3 | -	ES	8	11	09:10:00	BLCA	neoplasm_histologic_grade	"Low Grade" vs "High Grade"	0.2103	8.5e-05	0.000333	1
CDC37_RI_47514	CDC37	ENSG00000105401	chr19 | -	RI	4.1	4.3	4.2	BLCA	neoplasm_histologic_grade	"Low Grade" vs "High Grade"	0.1107	0.000129	0.000466	1
CDC42SE1_ES_7556	CDC42SE1	ENSG00000197622	chr1 | -	ES	4	6	5	BLCA	neoplasm_histologic_grade	"Low Grade" vs "High Grade"	0.1586	5.55e-05	0.000243	0.9953
CDC42SE2_RI_73223	CDC42SE2	ENSG00000158985	chr5 | +	RI	5.1	5.3	5.2	BLCA	neoplasm_histologic_grade	"Low Grade" vs "High Grade"	0.1721	0.00457	0.00676	1
CDH23_AT_12058	CDH23	ENSG00000107736	chr10 | +	AT	NA	NA	15.2	BLCA	neoplasm_histologic_grade	"Low Grade" vs "High Grade"	-0.1564	5.47e-05	0.000241	1
CDH23_AT_12059	CDH23	ENSG00000107736	chr10 | +	AT	NA	NA	27.2	BLCA	neoplasm_histologic_grade	"Low Grade" vs "High Grade"	0.1283	0.043	0.047	1
CDIPT_AP_35968	CDIPT	ENSG00000103502	chr16 | -	AP	NA	NA	1.1	BLCA	neoplasm_histologic_grade	"Low Grade" vs "High Grade"	-0.1788	0.00578	0.00825	0.9929
CDIPT_AP_35969	CDIPT	ENSG00000103502	chr16 | -	AP	NA	NA	3.1	BLCA	neoplasm_histologic_grade	"Low Grade" vs "High Grade"	0.1832	0.00358	0.00557	0.9929
CDK2_RI_22325	CDK2	ENSG00000123374	chr12 | +	RI	1.1	1.3	1.2	BLCA	neoplasm_histologic_grade	"Low Grade" vs "High Grade"	0.2046	8.02e-05	0.00032	0.9812
CENPI_AP_89628	CENPI	ENSG00000102384	chrX | +	AP	NA	NA	1	BLCA	neoplasm_histologic_grade	"Low Grade" vs "High Grade"	-0.221	0.00106	0.00215	0.9694
CENPI_AP_89629	CENPI	ENSG00000102384	chrX | +	AP	NA	NA	3	BLCA	neoplasm_histologic_grade	"Low Grade" vs "High Grade"	0.221	0.00106	0.00215	0.9694
CENPV_AA_39431	CENPV	ENSG00000166582	chr17 | -	AA	2	3.2	3.1	BLCA	neoplasm_histologic_grade	"Low Grade" vs "High Grade"	0.1024	0.00368	0.00568	0.9976
CEP57_RI_18393	CEP57	ENSG00000166037	chr11 | +	RI	10.1	10.3	10.2	BLCA	neoplasm_histologic_grade	"Low Grade" vs "High Grade"	0.1396	0.011	0.014	1
CERCAM_RI_87747	CERCAM	ENSG00000167123	chr9 | +	RI	3.1	3.3	3.2	BLCA	neoplasm_histologic_grade	"Low Grade" vs "High Grade"	0.2874	1.68e-05	0.000109	1
CFLAR_AT_56791	CFLAR	ENSG00000003402	chr2 | +	AT	NA	NA	9	BLCA	neoplasm_histologic_grade	"Low Grade" vs "High Grade"	-0.115	7.3e-05	0.000299	1
CFLAR_AT_56794	CFLAR	ENSG00000003402	chr2 | +	AT	NA	NA	17	BLCA	neoplasm_histologic_grade	"Low Grade" vs "High Grade"	0.102	1.04e-08	7.01e-07	1
CGGBP1_RI_65667	CGGBP1	ENSG00000163320	chr3 | -	RI	5.2	5.4	5.3	BLCA	neoplasm_histologic_grade	"Low Grade" vs "High Grade"	0.1992	0.000643	0.00149	0.9859
CGREF1_AT_52933	CGREF1	ENSG00000138028	chr2 | -	AT	NA	NA	9	BLCA	neoplasm_histologic_grade	"Low Grade" vs "High Grade"	0.324	9.33e-07	1.43e-05	0.9929
CGREF1_AT_52934	CGREF1	ENSG00000138028	chr2 | -	AT	NA	NA	7.4	BLCA	neoplasm_histologic_grade	"Low Grade" vs "High Grade"	-0.324	9.33e-07	1.43e-05	0.9929
CHEK1_AP_19307	CHEK1	ENSG00000149554	chr11 | +	AP	NA	NA	1	BLCA	neoplasm_histologic_grade	"Low Grade" vs "High Grade"	0.1808	1.74e-06	2.15e-05	1
CHEK1_AP_19309	CHEK1	ENSG00000149554	chr11 | +	AP	NA	NA	2.1	BLCA	neoplasm_histologic_grade	"Low Grade" vs "High Grade"	-0.1808	1.99e-06	2.4e-05	1
CHMP7_ES_83073	CHMP7	ENSG00000147457	chr8 | +	ES	3	5	4	BLCA	neoplasm_histologic_grade	"Low Grade" vs "High Grade"	0.2349	0.00162	0.00295	1
CHORDC1_AP_18260	CHORDC1	ENSG00000110172	chr11 | -	AP	NA	NA	1.1	BLCA	neoplasm_histologic_grade	"Low Grade" vs "High Grade"	-0.1065	0.000936	0.00197	1
CHTF8_RI_37265	CHTF8	ENSG00000168802	chr16 | -	RI	4.1	4.6	4.2:4.3:4.4:4.5	BLCA	neoplasm_histologic_grade	"Low Grade" vs "High Grade"	0.1374	0.03	0.034	0.9765
CIRBP_AA_46427	CIRBP	ENSG00000099622	chr19 | +	AA	9.3	9.8	9.5:9.6:9.7	BLCA	neoplasm_histologic_grade	"Low Grade" vs "High Grade"	0.1007	0.012	0.015	1
CIRBP_AD_46429	CIRBP	ENSG00000099622	chr19 | +	AD	9.3	9.8	9.4:9.5:9.6	BLCA	neoplasm_histologic_grade	"Low Grade" vs "High Grade"	0.1288	0.00283	0.00454	1
CIRBP_RI_46426	CIRBP	ENSG00000099622	chr19 | +	RI	9.3	9.8	9.4:9.5:9.6:9.7	BLCA	neoplasm_histologic_grade	"Low Grade" vs "High Grade"	0.1697	0.00266	0.00433	1
CKLF_ES_36733	CKLF	ENSG00000217555	chr16 | +	ES	1	4	2	BLCA	neoplasm_histologic_grade	"Low Grade" vs "High Grade"	-0.1128	0.0087	0.012	0.9859
CKMT1B_AA_30282	CKMT1B	ENSG00000237289	chr15 | +	AA	7.1	8.2	8.1	BLCA	neoplasm_histologic_grade	"Low Grade" vs "High Grade"	0.1028	0.000303	0.000853	0.9482
CLK3_AP_31725	CLK3	ENSG00000179335	chr15 | +	AP	NA	NA	2	BLCA	neoplasm_histologic_grade	"Low Grade" vs "High Grade"	-0.1426	0.011	0.014	0.9929
CLK3_AP_31726	CLK3	ENSG00000179335	chr15 | +	AP	NA	NA	1	BLCA	neoplasm_histologic_grade	"Low Grade" vs "High Grade"	0.1426	0.011	0.014	0.9929
CLN3_ME_35718	CLN3	ENSG00000261832	chr16 | -	ME	15	18	16|17	BLCA	neoplasm_histologic_grade	"Low Grade" vs "High Grade"	0.1169	0.00178	0.00317	0.9953
CLSPN_AT_1730	CLSPN	ENSG00000092853	chr1 | -	AT	NA	NA	25	BLCA	neoplasm_histologic_grade	"Low Grade" vs "High Grade"	-0.2867	5.23e-08	2.27e-06	1
CLSPN_AT_1731	CLSPN	ENSG00000092853	chr1 | -	AT	NA	NA	26	BLCA	neoplasm_histologic_grade	"Low Grade" vs "High Grade"	0.2867	5.23e-08	2.27e-06	1
CMC4_AP_90668	CMC4	ENSG00000182712	chrX | -	AP	NA	NA	2	BLCA	neoplasm_histologic_grade	"Low Grade" vs "High Grade"	0.1453	0.000868	0.00188	1
CMC4_AP_90669	CMC4	ENSG00000182712	chrX | -	AP	NA	NA	1	BLCA	neoplasm_histologic_grade	"Low Grade" vs "High Grade"	-0.1453	0.000868	0.00188	1
CNGB1_AT_36617	CNGB1	ENSG00000070729	chr16 | -	AT	NA	NA	34	BLCA	neoplasm_histologic_grade	"Low Grade" vs "High Grade"	-0.1707	0.00129	0.00247	0.9906
CNGB1_AT_36618	CNGB1	ENSG00000070729	chr16 | -	AT	NA	NA	13	BLCA	neoplasm_histologic_grade	"Low Grade" vs "High Grade"	0.1707	0.00129	0.00247	0.9906
CNN2_ES_46362	CNN2	ENSG00000064666	chr19 | +	ES	4.2	6	5.1:5.2	BLCA	neoplasm_histologic_grade	"Low Grade" vs "High Grade"	0.1488	0.00978	0.013	0.9435
CNNM2_AT_12983	CNNM2	ENSG00000148842	chr10 | +	AT	NA	NA	9	BLCA	neoplasm_histologic_grade	"Low Grade" vs "High Grade"	0.1029	0.00226	0.0038	1
CNNM2_AT_12984	CNNM2	ENSG00000148842	chr10 | +	AT	NA	NA	2	BLCA	neoplasm_histologic_grade	"Low Grade" vs "High Grade"	-0.1028	0.00226	0.0038	1
CNTNAP3B_AT_86482	CNTNAP3B	ENSG00000154529	chr9 | +	AT	NA	NA	25	BLCA	neoplasm_histologic_grade	"Low Grade" vs "High Grade"	0.2046	0.00303	0.0048	0.9953
CNTNAP3B_AT_86484	CNTNAP3B	ENSG00000154529	chr9 | +	AT	NA	NA	17.2	BLCA	neoplasm_histologic_grade	"Low Grade" vs "High Grade"	-0.241	0.029	0.033	0.9953
COG4_ES_37401	COG4	ENSG00000103051	chr16 | -	ES	8	10	9	BLCA	neoplasm_histologic_grade	"Low Grade" vs "High Grade"	0.1712	1.06e-05	7.72e-05	0.9929
COG4_ES_37403	COG4	ENSG00000103051	chr16 | -	ES	3	5.1	4	BLCA	neoplasm_histologic_grade	"Low Grade" vs "High Grade"	0.1087	6.64e-05	0.00028	0.9906
COLCA2_AP_18663	COLCA2	ENSG00000214290	chr11 | +	AP	NA	NA	2	BLCA	neoplasm_histologic_grade	"Low Grade" vs "High Grade"	-0.1073	0.00859	0.011	0.8447
COLCA2_AP_18664	COLCA2	ENSG00000214290	chr11 | +	AP	NA	NA	1	BLCA	neoplasm_histologic_grade	"Low Grade" vs "High Grade"	0.1073	0.00859	0.011	0.8447
COMMD4_ES_31851	COMMD4	ENSG00000140365	chr15 | +	ES	3	5.2	00:04:05.100000	BLCA	neoplasm_histologic_grade	"Low Grade" vs "High Grade"	0.211	0.019	0.023	0.8918
COPE_ES_48519	COPE	ENSG00000105669	chr19 | -	ES	3	6	04:05:00	BLCA	neoplasm_histologic_grade	"Low Grade" vs "High Grade"	0.1938	4.68e-05	0.00022	0.9835
COPS7B_AP_57936	COPS7B	ENSG00000144524	chr2 | +	AP	NA	NA	2	BLCA	neoplasm_histologic_grade	"Low Grade" vs "High Grade"	-0.1048	0.00344	0.00536	0.9976
COPS7B_AP_57937	COPS7B	ENSG00000144524	chr2 | +	AP	NA	NA	1	BLCA	neoplasm_histologic_grade	"Low Grade" vs "High Grade"	0.1048	0.00344	0.00536	0.9976
COX4I1_ES_156376	COX4I1	ENSG00000131143	chr16 | +	ES	4.1	5.4	4.2:5.1	BLCA	neoplasm_histologic_grade	"Low Grade" vs "High Grade"	-0.1045	0.0087	0.012	0.9271
CRCP_ES_79873	CRCP	ENSG00000241258	chr7 | +	ES	3	5	4	BLCA	neoplasm_histologic_grade	"Low Grade" vs "High Grade"	0.1991	0.00125	0.00241	1
CREM_AP_11229	CREM	ENSG00000095794	chr10 | +	AP	NA	NA	1	BLCA	neoplasm_histologic_grade	"Low Grade" vs "High Grade"	0.1056	0.018	0.022	0.9953
CS_ES_22418	CS	ENSG00000062485	chr12 | -	ES	5.2	7	6	BLCA	neoplasm_histologic_grade	"Low Grade" vs "High Grade"	0.1868	0.000619	0.00145	1
CSF2RA_ES_88369	CSF2RA	ENSG00000198223	chrX | +	ES	12	14	13	BLCA	neoplasm_histologic_grade	"Low Grade" vs "High Grade"	0.2054	3.05e-05	0.000161	1
CSMD2_AT_1687	CSMD2	ENSG00000121904	chr1 | -	AT	NA	NA	50	BLCA	neoplasm_histologic_grade	"Low Grade" vs "High Grade"	0.1973	5.06e-06	4.57e-05	1
CTAGE5_AP_27372	CTAGE5	ENSG00000150527	chr14 | +	AP	NA	NA	2	BLCA	neoplasm_histologic_grade	"Low Grade" vs "High Grade"	0.1648	0.00421	0.00632	0.9953
CTBP1_AP_68460	CTBP1	ENSG00000159692	chr4 | -	AP	NA	NA	2.1	BLCA	neoplasm_histologic_grade	"Low Grade" vs "High Grade"	0.1723	0.00729	0.00997	0.9953
CTBP1_AP_68461	CTBP1	ENSG00000159692	chr4 | -	AP	NA	NA	1	BLCA	neoplasm_histologic_grade	"Low Grade" vs "High Grade"	-0.1723	0.00729	0.00997	0.9953
CTNNBIP1_AP_580	CTNNBIP1	ENSG00000178585	chr1 | -	AP	NA	NA	4	BLCA	neoplasm_histologic_grade	"Low Grade" vs "High Grade"	0.1084	0.00676	0.00938	0.9929
CUZD1_AP_13374	CUZD1	ENSG00000138161	chr10 | -	AP	NA	NA	3	BLCA	neoplasm_histologic_grade	"Low Grade" vs "High Grade"	0.1452	0.00241	0.00401	0.9318
CUZD1_AP_13376	CUZD1	ENSG00000138161	chr10 | -	AP	NA	NA	1	BLCA	neoplasm_histologic_grade	"Low Grade" vs "High Grade"	-0.1452	0.00241	0.00401	0.9318
CWC25_AD_40597	CWC25	ENSG00000108296	chr17 | -	AD	6.1	7	6.2	BLCA	neoplasm_histologic_grade	"Low Grade" vs "High Grade"	0.2883	1.45e-06	1.84e-05	0.9953
CXorf40A_AP_90295	CXorf40A	ENSG00000197620	chrX | +	AP	NA	NA	2	BLCA	neoplasm_histologic_grade	"Low Grade" vs "High Grade"	0.1773	0.011	0.014	0.9953
CXorf40A_AP_90298	CXorf40A	ENSG00000197620	chrX | +	AP	NA	NA	1.1	BLCA	neoplasm_histologic_grade	"Low Grade" vs "High Grade"	-0.1726	0.016	0.019	0.9953
CYB561A3_AA_16164	CYB561A3	ENSG00000162144	chr11 | -	AA	6.4	6.7	6.6	BLCA	neoplasm_histologic_grade	"Low Grade" vs "High Grade"	-0.1251	0.000101	0.000387	1
CYFIP1_AP_29674	CYFIP1	ENSG00000068793	chr15 | +	AP	NA	NA	18.1	BLCA	neoplasm_histologic_grade	"Low Grade" vs "High Grade"	0.1955	0.00618	0.00871	0.9647
CYFIP1_AP_29675	CYFIP1	ENSG00000068793	chr15 | +	AP	NA	NA	1	BLCA	neoplasm_histologic_grade	"Low Grade" vs "High Grade"	-0.1955	0.0062	0.00871	0.9647
CYGB_AP_43589	CYGB	ENSG00000161544	chr17 | -	AP	NA	NA	1	BLCA	neoplasm_histologic_grade	"Low Grade" vs "High Grade"	0.2167	0.000469	0.00117	0.9953
CYGB_AP_43591	CYGB	ENSG00000161544	chr17 | -	AP	NA	NA	2	BLCA	neoplasm_histologic_grade	"Low Grade" vs "High Grade"	-0.2382	0.000748	0.00168	0.9953
CYP2R1_AP_14479	CYP2R1	ENSG00000186104	chr11 | -	AP	NA	NA	4.1	BLCA	neoplasm_histologic_grade	"Low Grade" vs "High Grade"	0.133	0.000159	0.000533	0.9953
CYP46A1_AT_29229	CYP46A1	ENSG00000036530	chr14 | +	AT	NA	NA	17	BLCA	neoplasm_histologic_grade	"Low Grade" vs "High Grade"	-0.167	0.025	0.029	0.9976
CYP46A1_AT_29230	CYP46A1	ENSG00000036530	chr14 | +	AT	NA	NA	9.2	BLCA	neoplasm_histologic_grade	"Low Grade" vs "High Grade"	0.167	0.025	0.029	0.9976
CYP4F12_RI_48110	CYP4F12	ENSG00000186204	chr19 | +	RI	12.1	12.3	12.2	BLCA	neoplasm_histologic_grade	"Low Grade" vs "High Grade"	0.1294	0.000605	0.00143	0.8047
DACT3_AT_50576	DACT3	ENSG00000197380	chr19 | -	AT	NA	NA	4.2	BLCA	neoplasm_histologic_grade	"Low Grade" vs "High Grade"	0.2363	0.000113	0.000422	1
DACT3_AT_50577	DACT3	ENSG00000197380	chr19 | -	AT	NA	NA	5	BLCA	neoplasm_histologic_grade	"Low Grade" vs "High Grade"	-0.2363	0.000113	0.000422	1
DAGLB_AD_78725	DAGLB	ENSG00000164535	chr7 | -	AD	12.2	13	12.3	BLCA	neoplasm_histologic_grade	"Low Grade" vs "High Grade"	0.1199	0.000725	0.00164	1
DAPL1_AT_55686	DAPL1	ENSG00000163331	chr2 | +	AT	NA	NA	6	BLCA	neoplasm_histologic_grade	"Low Grade" vs "High Grade"	-0.3764	0.00105	0.00213	0.9059
DAPL1_AT_55687	DAPL1	ENSG00000163331	chr2 | +	AT	NA	NA	4	BLCA	neoplasm_histologic_grade	"Low Grade" vs "High Grade"	0.3764	0.00105	0.00213	0.9059
DBF4B_AT_41883	DBF4B	ENSG00000161692	chr17 | +	AT	NA	NA	14.3	BLCA	neoplasm_histologic_grade	"Low Grade" vs "High Grade"	0.1985	2.3e-06	2.67e-05	1
DBF4B_AT_41884	DBF4B	ENSG00000161692	chr17 | +	AT	NA	NA	13.2	BLCA	neoplasm_histologic_grade	"Low Grade" vs "High Grade"	-0.1985	2.3e-06	2.67e-05	1
DCTN3_AA_86187	DCTN3	ENSG00000137100	chr9 | -	AA	3.1	3.5	3.3:3.4	BLCA	neoplasm_histologic_grade	"Low Grade" vs "High Grade"	0.1798	0.00125	0.00241	0.9953
DCTN3_AD_86188	DCTN3	ENSG00000137100	chr9 | -	AD	3.1	3.5	3.2:3.3	BLCA	neoplasm_histologic_grade	"Low Grade" vs "High Grade"	0.3	0.00514	0.00745	0.96
DCTN3_RI_86182	DCTN3	ENSG00000137100	chr9 | -	RI	3.5	3.7	3.6	BLCA	neoplasm_histologic_grade	"Low Grade" vs "High Grade"	0.159	0.00114	0.00227	0.9576
DCTN5_ES_35626	DCTN5	ENSG00000166847	chr16 | +	ES	2	5	4	BLCA	neoplasm_histologic_grade	"Low Grade" vs "High Grade"	0.1555	0.00336	0.00525	1
DDB1_AP_16152	DDB1	ENSG00000167986	chr11 | -	AP	NA	NA	3.1	BLCA	neoplasm_histologic_grade	"Low Grade" vs "High Grade"	-0.2109	0.00557	0.00798	0.9976
DDB1_AP_16155	DDB1	ENSG00000167986	chr11 | -	AP	NA	NA	1	BLCA	neoplasm_histologic_grade	"Low Grade" vs "High Grade"	0.1406	7.93e-05	0.000317	0.9976
DDX17_AP_62237	DDX17	ENSG00000100201	chr22 | -	AP	NA	NA	12.1	BLCA	neoplasm_histologic_grade	"Low Grade" vs "High Grade"	0.2382	3.98e-06	3.82e-05	1
DDX17_AP_62238	DDX17	ENSG00000100201	chr22 | -	AP	NA	NA	1	BLCA	neoplasm_histologic_grade	"Low Grade" vs "High Grade"	-0.2382	3.98e-06	3.82e-05	1
DDX19A_ES_37382	DDX19A	ENSG00000168872	chr16 | +	ES	1	3	2	BLCA	neoplasm_histologic_grade	"Low Grade" vs "High Grade"	0.173	0.03	0.034	1
DDX20_RI_4189	DDX20	ENSG00000064703	chr1 | +	RI	5.7	5.9	5.8	BLCA	neoplasm_histologic_grade	"Low Grade" vs "High Grade"	0.1213	0.00983	0.013	0.9129
DDX55_AP_25083	DDX55	ENSG00000111364	chr12 | +	AP	NA	NA	1	BLCA	neoplasm_histologic_grade	"Low Grade" vs "High Grade"	-0.1147	0.000291	0.000827	1
DDX55_AP_25084	DDX55	ENSG00000111364	chr12 | +	AP	NA	NA	12.1	BLCA	neoplasm_histologic_grade	"Low Grade" vs "High Grade"	0.1147	0.000291	0.000827	1
DEF8_ES_38194	DEF8	ENSG00000140995	chr16 | +	ES	1	4	2.1	BLCA	neoplasm_histologic_grade	"Low Grade" vs "High Grade"	0.1304	0.00406	0.00615	0.9906
DENND2A_AT_82008	DENND2A	ENSG00000146966	chr7 | -	AT	NA	NA	14.2	BLCA	neoplasm_histologic_grade	"Low Grade" vs "High Grade"	0.1185	0.00225	0.0038	1
DENND2A_AT_82009	DENND2A	ENSG00000146966	chr7 | -	AT	NA	NA	20	BLCA	neoplasm_histologic_grade	"Low Grade" vs "High Grade"	-0.1185	0.00225	0.0038	1
DENND5B_AT_20993	DENND5B	ENSG00000170456	chr12 | -	AT	NA	NA	12.2	BLCA	neoplasm_histologic_grade	"Low Grade" vs "High Grade"	0.1336	0.000717	0.00162	1
DENND5B_AT_20994	DENND5B	ENSG00000170456	chr12 | -	AT	NA	NA	25	BLCA	neoplasm_histologic_grade	"Low Grade" vs "High Grade"	-0.1336	0.000717	0.00162	1
DFFB_ES_346	DFFB	ENSG00000169598	chr1 | +	ES	4.3	6	5	BLCA	neoplasm_histologic_grade	"Low Grade" vs "High Grade"	0.1814	0.00796	0.011	0.8329
DGKZ_AP_15540	DGKZ	ENSG00000149091	chr11 | +	AP	NA	NA	3	BLCA	neoplasm_histologic_grade	"Low Grade" vs "High Grade"	-0.2268	1.39e-05	9.17e-05	0.9929
DGKZ_AP_15541	DGKZ	ENSG00000149091	chr11 | +	AP	NA	NA	2	BLCA	neoplasm_histologic_grade	"Low Grade" vs "High Grade"	0.2556	1.72e-06	2.14e-05	0.9929
DIABLO_RI_24937	DIABLO	ENSG00000184047	chr12 | -	RI	2.1	2.3	2.2	BLCA	neoplasm_histologic_grade	"Low Grade" vs "High Grade"	0.1602	0.000267	0.000787	1
DMKN_AP_49132	DMKN	ENSG00000161249	chr19 | -	AP	NA	NA	6.1	BLCA	neoplasm_histologic_grade	"Low Grade" vs "High Grade"	0.2063	0.017	0.02	0.9765
DMKN_AP_49133	DMKN	ENSG00000161249	chr19 | -	AP	NA	NA	1	BLCA	neoplasm_histologic_grade	"Low Grade" vs "High Grade"	-0.1287	0.00154	0.00284	0.9765
DMPK_AA_50526	DMPK	ENSG00000104936	chr19 | -	AA	1	2.4	2.2:2.3	BLCA	neoplasm_histologic_grade	"Low Grade" vs "High Grade"	0.1215	0.0052	0.00753	0.9694
DMPK_AP_50519	DMPK	ENSG00000104936	chr19 | -	AP	NA	NA	2.1	BLCA	neoplasm_histologic_grade	"Low Grade" vs "High Grade"	0.1124	0.00114	0.00227	1
DMPK_AP_50520	DMPK	ENSG00000104936	chr19 | -	AP	NA	NA	1	BLCA	neoplasm_histologic_grade	"Low Grade" vs "High Grade"	-0.1124	0.00114	0.00227	1
DMTF1_AP_80288	DMTF1	ENSG00000135164	chr7 | +	AP	NA	NA	1.1	BLCA	neoplasm_histologic_grade	"Low Grade" vs "High Grade"	-0.2045	0.000166	0.000549	0.9882
DMTF1_AP_80289	DMTF1	ENSG00000135164	chr7 | +	AP	NA	NA	4.1	BLCA	neoplasm_histologic_grade	"Low Grade" vs "High Grade"	0.2046	0.000166	0.000549	0.9882
DNAJA3_ES_33726	DNAJA3	ENSG00000103423	chr16 | +	ES	1	3	2	BLCA	neoplasm_histologic_grade	"Low Grade" vs "High Grade"	0.2554	0.000199	0.000638	1
DNAJA4_AP_32067	DNAJA4	ENSG00000140403	chr15 | +	AP	NA	NA	1	BLCA	neoplasm_histologic_grade	"Low Grade" vs "High Grade"	0.1081	8.45e-05	0.000332	0.9271
DNASE1L3_RI_65424	DNASE1L3	ENSG00000163687	chr3 | -	RI	9.1	9.3	9.2	BLCA	neoplasm_histologic_grade	"Low Grade" vs "High Grade"	0.1319	0.043	0.048	0.9671
DNM1L_ES_21045	DNM1L	ENSG00000087470	chr12 | +	ES	16	19	17:18:00	BLCA	neoplasm_histologic_grade	"Low Grade" vs "High Grade"	0.1163	0.013	0.017	0.9929
DPP9_ES_46826	DPP9	ENSG00000142002	chr19 | -	ES	3	6	4	BLCA	neoplasm_histologic_grade	"Low Grade" vs "High Grade"	0.1061	0.016	0.019	1
DRG2_RI_39548	DRG2	ENSG00000108591	chr17 | +	RI	6.2	6.4	6.3	BLCA	neoplasm_histologic_grade	"Low Grade" vs "High Grade"	0.1135	0.000799	0.00177	1
DST_ES_76561	DST	ENSG00000151914	chr6 | -	ES	103	105	104	BLCA	neoplasm_histologic_grade	"Low Grade" vs "High Grade"	0.1168	0.000226	0.000696	0.9859
DUSP14_AP_40524	DUSP14	ENSG00000161326	chr17 | +	AP	NA	NA	1	BLCA	neoplasm_histologic_grade	"Low Grade" vs "High Grade"	-0.1082	0.000252	0.000755	0.9835
DUSP14_AP_40525	DUSP14	ENSG00000161326	chr17 | +	AP	NA	NA	3.1	BLCA	neoplasm_histologic_grade	"Low Grade" vs "High Grade"	0.1016	5.2e-06	4.67e-05	0.9835
DUSP18_AT_61793	DUSP18	ENSG00000167065	chr22 | -	AT	NA	NA	3	BLCA	neoplasm_histologic_grade	"Low Grade" vs "High Grade"	0.1492	4.19e-05	0.000203	1
DVL1_AD_141	DVL1	ENSG00000107404	chr1 | -	AD	11.1	12	11.2	BLCA	neoplasm_histologic_grade	"Low Grade" vs "High Grade"	0.1428	4.55e-05	0.000215	0.9976
DYM_ES_45472	DYM	ENSG00000141627	chr18 | -	ES	2	6	03:05:00	BLCA	neoplasm_histologic_grade	"Low Grade" vs "High Grade"	0.249	4.42e-05	0.000211	0.9835
DYNC1I2_AP_55938	DYNC1I2	ENSG00000077380	chr2 | +	AP	NA	NA	1	BLCA	neoplasm_histologic_grade	"Low Grade" vs "High Grade"	-0.1012	0.000406	0.00106	1
DYNC1I2_AP_55939	DYNC1I2	ENSG00000077380	chr2 | +	AP	NA	NA	2	BLCA	neoplasm_histologic_grade	"Low Grade" vs "High Grade"	0.1012	0.000406	0.00106	1
ECHDC2_ES_3033	ECHDC2	ENSG00000121310	chr1 | -	ES	2.1	6.2	5.1:6.1	BLCA	neoplasm_histologic_grade	"Low Grade" vs "High Grade"	-0.1394	0.0048	0.00705	0.9812
EDEM2_AP_59063	EDEM2	ENSG00000088298	chr20 | -	AP	NA	NA	6	BLCA	neoplasm_histologic_grade	"Low Grade" vs "High Grade"	-0.155	2.83e-05	0.000152	1
EDEM2_AP_59064	EDEM2	ENSG00000088298	chr20 | -	AP	NA	NA	1	BLCA	neoplasm_histologic_grade	"Low Grade" vs "High Grade"	0.1631	1.98e-05	0.000122	1
EDF1_RI_88229	EDF1	ENSG00000107223	chr9 | -	RI	4.1	4.3	4.2	BLCA	neoplasm_histologic_grade	"Low Grade" vs "High Grade"	0.1085	0.000634	0.00148	1
EEF1D_ES_85447	EEF1D	ENSG00000104529	chr8 | -	ES	8.2	13.2	8.3:9:10.1:10.2:11:12.2:13.1	BLCA	neoplasm_histologic_grade	"Low Grade" vs "High Grade"	0.1167	0.0043	0.00643	0.9976
EFCAB11_AT_28797	EFCAB11	ENSG00000140025	chr14 | -	AT	NA	NA	7	BLCA	neoplasm_histologic_grade	"Low Grade" vs "High Grade"	-0.1192	0.000577	0.00138	1
EFCAB11_AT_28799	EFCAB11	ENSG00000140025	chr14 | -	AT	NA	NA	12	BLCA	neoplasm_histologic_grade	"Low Grade" vs "High Grade"	0.1426	0.000316	0.00088	1
EFHC1_RI_76472	EFHC1	ENSG00000096093	chr6 | +	RI	5.1	5.3	5.2	BLCA	neoplasm_histologic_grade	"Low Grade" vs "High Grade"	0.2439	0.000211	0.000658	0.9906
EFR3B_AT_52846	EFR3B	ENSG00000084710	chr2 | +	AT	NA	NA	21.2	BLCA	neoplasm_histologic_grade	"Low Grade" vs "High Grade"	0.2441	0.000256	0.000765	0.9882
EFR3B_AT_52847	EFR3B	ENSG00000084710	chr2 | +	AT	NA	NA	25	BLCA	neoplasm_histologic_grade	"Low Grade" vs "High Grade"	-0.2441	0.000256	0.000765	0.9882
EHBP1L1_AP_16875	EHBP1L1	ENSG00000173442	chr11 | +	AP	NA	NA	1	BLCA	neoplasm_histologic_grade	"Low Grade" vs "High Grade"	-0.2013	0.00111	0.00222	1
EHBP1L1_AP_16876	EHBP1L1	ENSG00000173442	chr11 | +	AP	NA	NA	17.1	BLCA	neoplasm_histologic_grade	"Low Grade" vs "High Grade"	0.2013	0.00111	0.00222	1
EIF2A_ES_67287	EIF2A	ENSG00000144895	chr3 | +	ES	2	4	3	BLCA	neoplasm_histologic_grade	"Low Grade" vs "High Grade"	0.196	0.000438	0.00112	1
ELF2_AP_70608	ELF2	ENSG00000109381	chr4 | -	AP	NA	NA	1	BLCA	neoplasm_histologic_grade	"Low Grade" vs "High Grade"	-0.1133	8.43e-07	1.38e-05	1
ELF2_AP_70610	ELF2	ENSG00000109381	chr4 | -	AP	NA	NA	8	BLCA	neoplasm_histologic_grade	"Low Grade" vs "High Grade"	0.1133	8.43e-07	1.38e-05	1
ELMOD3_RI_54226	ELMOD3	ENSG00000115459	chr2 | +	RI	2.3	2.9	2.4:2.5:2.6:2.7:2.8	BLCA	neoplasm_histologic_grade	"Low Grade" vs "High Grade"	0.116	0.00256	0.0042	0.9976
EMC10_ES_51201	EMC10	ENSG00000161671	chr19 | +	ES	6	8.1	7	BLCA	neoplasm_histologic_grade	"Low Grade" vs "High Grade"	0.2385	8.18e-09	5.75e-07	0.9976
EMR2_AT_48028	EMR2	ENSG00000127507	chr19 | -	AT	NA	NA	21	BLCA	neoplasm_histologic_grade	"Low Grade" vs "High Grade"	0.3137	8.74e-05	0.000339	1
EMR2_AT_48029	EMR2	ENSG00000127507	chr19 | -	AT	NA	NA	22	BLCA	neoplasm_histologic_grade	"Low Grade" vs "High Grade"	-0.3137	8.07e-05	0.000321	1
ENDOV_ES_44066	ENDOV	ENSG00000173818	chr17 | +	ES	2.4	6.2	5	BLCA	neoplasm_histologic_grade	"Low Grade" vs "High Grade"	0.1696	5.15e-05	0.000232	0.9506
ENO2_AP_20011	ENO2	ENSG00000111674	chr12 | +	AP	NA	NA	2.1	BLCA	neoplasm_histologic_grade	"Low Grade" vs "High Grade"	0.1722	0.00718	0.00987	0.9718
ENO2_AP_20012	ENO2	ENSG00000111674	chr12 | +	AP	NA	NA	1	BLCA	neoplasm_histologic_grade	"Low Grade" vs "High Grade"	-0.1722	0.00718	0.00987	0.9718
ENOSF1_AP_44459	ENOSF1	ENSG00000132199	chr18 | -	AP	NA	NA	11	BLCA	neoplasm_histologic_grade	"Low Grade" vs "High Grade"	0.1023	0.00432	0.00644	1
ENOSF1_AP_44460	ENOSF1	ENSG00000132199	chr18 | -	AP	NA	NA	1.1	BLCA	neoplasm_histologic_grade	"Low Grade" vs "High Grade"	-0.1023	0.00432	0.00644	1
ENOSF1_ES_44474	ENOSF1	ENSG00000132199	chr18 | -	ES	5	7	6	BLCA	neoplasm_histologic_grade	"Low Grade" vs "High Grade"	0.1289	0.031	0.035	0.9788
ENTHD2_AD_44112	ENTHD2	ENSG00000167302	chr17 | -	AD	1.1	2	1.2	BLCA	neoplasm_histologic_grade	"Low Grade" vs "High Grade"	0.249	2.21e-05	0.000129	0.9835
EPB41L5_AT_55145	EPB41L5	ENSG00000115109	chr2 | +	AT	NA	NA	17	BLCA	neoplasm_histologic_grade	"Low Grade" vs "High Grade"	-0.1032	0.000395	0.00104	1
EPB41L5_AT_55146	EPB41L5	ENSG00000115109	chr2 | +	AT	NA	NA	26	BLCA	neoplasm_histologic_grade	"Low Grade" vs "High Grade"	0.1032	0.000395	0.00104	1
EPHA3_AT_65671	EPHA3	ENSG00000044524	chr3 | +	AT	NA	NA	7.2	BLCA	neoplasm_histologic_grade	"Low Grade" vs "High Grade"	0.124	0.000383	0.00102	1
EPHA3_AT_65672	EPHA3	ENSG00000044524	chr3 | +	AT	NA	NA	17	BLCA	neoplasm_histologic_grade	"Low Grade" vs "High Grade"	-0.124	0.000383	0.00102	1
EPHB2_RI_1026	EPHB2	ENSG00000133216	chr1 | +	RI	17.1	17.3	17.2	BLCA	neoplasm_histologic_grade	"Low Grade" vs "High Grade"	0.2865	1.03e-05	7.68e-05	1
EPS15L1_AP_48151	EPS15L1	ENSG00000127527	chr19 | -	AP	NA	NA	1	BLCA	neoplasm_histologic_grade	"Low Grade" vs "High Grade"	-0.1649	0.00194	0.00341	1
EPS15L1_AP_48152	EPS15L1	ENSG00000127527	chr19 | -	AP	NA	NA	7.1	BLCA	neoplasm_histologic_grade	"Low Grade" vs "High Grade"	0.1649	0.00194	0.00341	1
EPS15L1_AT_48153	EPS15L1	ENSG00000127527	chr19 | -	AT	NA	NA	16.3	BLCA	neoplasm_histologic_grade	"Low Grade" vs "High Grade"	-0.1322	1.32e-05	8.93e-05	1
EPS15L1_AT_48158	EPS15L1	ENSG00000127527	chr19 | -	AT	NA	NA	24	BLCA	neoplasm_histologic_grade	"Low Grade" vs "High Grade"	0.1329	4.17e-05	0.000203	1
ERCC4_AT_34064	ERCC4	ENSG00000175595	chr16 | +	AT	NA	NA	11	BLCA	neoplasm_histologic_grade	"Low Grade" vs "High Grade"	-0.1244	0.000115	0.000425	1
ERCC4_AT_34065	ERCC4	ENSG00000175595	chr16 | +	AT	NA	NA	6.2	BLCA	neoplasm_histologic_grade	"Low Grade" vs "High Grade"	0.1244	0.000115	0.000425	1
ERICH1_AT_82553	ERICH1	ENSG00000104714	chr8 | -	AT	NA	NA	6	BLCA	neoplasm_histologic_grade	"Low Grade" vs "High Grade"	-0.1102	0.00535	0.00769	1
ERICH1_AT_82554	ERICH1	ENSG00000104714	chr8 | -	AT	NA	NA	7	BLCA	neoplasm_histologic_grade	"Low Grade" vs "High Grade"	0.1102	0.00535	0.00769	1
ERRFI1_RI_533	ERRFI1	ENSG00000116285	chr1 | -	RI	3.2	3.4	3.3	BLCA	neoplasm_histologic_grade	"Low Grade" vs "High Grade"	0.2168	0.000568	0.00137	0.9906
ESYT2_AP_82534	ESYT2	ENSG00000117868	chr7 | -	AP	NA	NA	1	BLCA	neoplasm_histologic_grade	"Low Grade" vs "High Grade"	-0.225	0.00532	0.00766	1
ESYT2_AP_82535	ESYT2	ENSG00000117868	chr7 | -	AP	NA	NA	16.1	BLCA	neoplasm_histologic_grade	"Low Grade" vs "High Grade"	0.225	0.00532	0.00766	1
ETV4_AP_41709	ETV4	ENSG00000175832	chr17 | -	AP	NA	NA	1	BLCA	neoplasm_histologic_grade	"Low Grade" vs "High Grade"	-0.1916	1.5e-06	1.89e-05	0.8588
ETV4_AP_41710	ETV4	ENSG00000175832	chr17 | -	AP	NA	NA	10.1	BLCA	neoplasm_histologic_grade	"Low Grade" vs "High Grade"	0.2947	6.09e-07	1.22e-05	0.8588
EXD3_AT_88296	EXD3	ENSG00000187609	chr9 | -	AT	NA	NA	3	BLCA	neoplasm_histologic_grade	"Low Grade" vs "High Grade"	-0.1987	0.00133	0.00253	1
EXD3_AT_88298	EXD3	ENSG00000187609	chr9 | -	AT	NA	NA	27	BLCA	neoplasm_histologic_grade	"Low Grade" vs "High Grade"	0.205	0.0007	0.00159	1
EXOC1_ES_69335	EXOC1	ENSG00000090989	chr4 | +	ES	10	12	11	BLCA	neoplasm_histologic_grade	"Low Grade" vs "High Grade"	0.1205	0.000221	0.000683	0.9741
EXOC7_AA_43567	EXOC7	ENSG00000182473	chr17 | -	AA	7	8.2	8.1	BLCA	neoplasm_histologic_grade	"Low Grade" vs "High Grade"	0.1738	1.03e-05	7.68e-05	0.8729
EXOC7_ES_43568	EXOC7	ENSG00000182473	chr17 | -	ES	6	8.2	00:07:08.100000	BLCA	neoplasm_histologic_grade	"Low Grade" vs "High Grade"	0.1194	0.000419	0.00109	0.9459
EXOC7_ES_43570	EXOC7	ENSG00000182473	chr17 | -	ES	6	9	7:8.1:8.2	BLCA	neoplasm_histologic_grade	"Low Grade" vs "High Grade"	0.1466	5.33e-05	0.000238	0.9953
EXOSC10_ES_647	EXOSC10	ENSG00000171824	chr1 | -	ES	3	5	4	BLCA	neoplasm_histologic_grade	"Low Grade" vs "High Grade"	0.1241	0.012	0.015	1
EXOSC9_RI_70501	EXOSC9	ENSG00000123737	chr4 | +	RI	10.1	10.3	10.2	BLCA	neoplasm_histologic_grade	"Low Grade" vs "High Grade"	0.1257	0.00178	0.00317	1
EZH2_RI_82155	EZH2	ENSG00000106462	chr7 | -	RI	14.3	14.5	14.4	BLCA	neoplasm_histologic_grade	"Low Grade" vs "High Grade"	0.1152	0.00217	0.00372	0.9765
FADS1_AP_16298	FADS1	ENSG00000149485	chr11 | -	AP	NA	NA	9.1	BLCA	neoplasm_histologic_grade	"Low Grade" vs "High Grade"	0.1739	0.000615	0.00145	1
FADS1_AP_16299	FADS1	ENSG00000149485	chr11 | -	AP	NA	NA	1	BLCA	neoplasm_histologic_grade	"Low Grade" vs "High Grade"	-0.1588	0.000376	0.00101	1
FAH_RI_32179	FAH	ENSG00000103876	chr15 | +	RI	1.2	1.4	1.3	BLCA	neoplasm_histologic_grade	"Low Grade" vs "High Grade"	0.143	0.011	0.014	0.9271
FAM110A_AP_58466	FAM110A	ENSG00000125898	chr20 | +	AP	NA	NA	4.1	BLCA	neoplasm_histologic_grade	"Low Grade" vs "High Grade"	0.2152	0.000297	0.00084	0.9953
FAM110A_AP_58467	FAM110A	ENSG00000125898	chr20 | +	AP	NA	NA	1	BLCA	neoplasm_histologic_grade	"Low Grade" vs "High Grade"	-0.2102	2.57e-05	0.000142	0.9953
FAM110A_ES_58470	FAM110A	ENSG00000125898	chr20 | +	ES	1	4.2	3	BLCA	neoplasm_histologic_grade	"Low Grade" vs "High Grade"	0.1552	0.00175	0.00314	0.9976
FAM111A_AA_16027	FAM111A	ENSG00000166801	chr11 | +	AA	2	3.3	3.1:3.2	BLCA	neoplasm_histologic_grade	"Low Grade" vs "High Grade"	0.2316	0.00681	0.00944	0.9106
FAM111A_AP_16022	FAM111A	ENSG00000166801	chr11 | +	AP	NA	NA	4.1	BLCA	neoplasm_histologic_grade	"Low Grade" vs "High Grade"	0.1604	0.00196	0.00345	0.9059
FAM111A_AP_16023	FAM111A	ENSG00000166801	chr11 | +	AP	NA	NA	1.1	BLCA	neoplasm_histologic_grade	"Low Grade" vs "High Grade"	-0.156	0.00295	0.00471	0.9059
FAM131A_AP_67924	FAM131A	ENSG00000175182	chr3 | +	AP	NA	NA	6.1	BLCA	neoplasm_histologic_grade	"Low Grade" vs "High Grade"	0.1327	7.45e-05	0.000302	0.9953
FAM131A_AP_67927	FAM131A	ENSG00000175182	chr3 | +	AP	NA	NA	1	BLCA	neoplasm_histologic_grade	"Low Grade" vs "High Grade"	-0.1752	0.000171	0.000564	0.9953
FAM134C_AP_41082	FAM134C	ENSG00000141699	chr17 | -	AP	NA	NA	1	BLCA	neoplasm_histologic_grade	"Low Grade" vs "High Grade"	0.147	0.013	0.016	0.9906
FAM134C_AP_41083	FAM134C	ENSG00000141699	chr17 | -	AP	NA	NA	2.1	BLCA	neoplasm_histologic_grade	"Low Grade" vs "High Grade"	-0.147	0.013	0.016	0.9906
FAM136A_ES_53891	FAM136A	ENSG00000035141	chr2 | -	ES	1.1	2	1.3	BLCA	neoplasm_histologic_grade	"Low Grade" vs "High Grade"	0.1145	0.0062	0.00871	1
FAM192A_AP_36527	FAM192A	ENSG00000172775	chr16 | -	AP	NA	NA	1.1	BLCA	neoplasm_histologic_grade	"Low Grade" vs "High Grade"	-0.1166	0.00309	0.0049	1
FAM195A_ES_32927	FAM195A	ENSG00000172366	chr16 | +	ES	2	4	3	BLCA	neoplasm_histologic_grade	"Low Grade" vs "High Grade"	0.1887	1.17e-05	8.18e-05	1
FAM219B_ES_31798	FAM219B	ENSG00000178761	chr15 | -	ES	2	4	3.1:3.2	BLCA	neoplasm_histologic_grade	"Low Grade" vs "High Grade"	0.1492	0.00119	0.00232	0.9976
FAM221A_ES_78990	FAM221A	ENSG00000188732	chr7 | +	ES	2	4	3.1:3.2:3.3	BLCA	neoplasm_histologic_grade	"Low Grade" vs "High Grade"	0.1198	0.012	0.015	1
FAM47E_AT_69601	FAM47E	ENSG00000189157	chr4 | +	AT	NA	NA	11	BLCA	neoplasm_histologic_grade	"Low Grade" vs "High Grade"	-0.1044	0.00611	0.00864	1
FAM47E_AT_69602	FAM47E	ENSG00000189157	chr4 | +	AT	NA	NA	10	BLCA	neoplasm_histologic_grade	"Low Grade" vs "High Grade"	0.1044	0.00611	0.00864	1
FAM65B_AT_75540	FAM65B	ENSG00000111913	chr6 | -	AT	NA	NA	18	BLCA	neoplasm_histologic_grade	"Low Grade" vs "High Grade"	-0.111	0.000262	0.000781	1
FAM65B_AT_75541	FAM65B	ENSG00000111913	chr6 | -	AT	NA	NA	19	BLCA	neoplasm_histologic_grade	"Low Grade" vs "High Grade"	-0.1438	6.35e-06	5.45e-05	1
FAM65B_AT_75542	FAM65B	ENSG00000111913	chr6 | -	AT	NA	NA	28	BLCA	neoplasm_histologic_grade	"Low Grade" vs "High Grade"	0.3131	3.52e-07	8.43e-06	1
FAM72A_AP_9575	FAM72A	ENSG00000196550	chr1 | +	AP	NA	NA	1	BLCA	neoplasm_histologic_grade	"Low Grade" vs "High Grade"	0.181	0.00115	0.00228	0.9976
FAM72A_AP_9576	FAM72A	ENSG00000196550	chr1 | +	AP	NA	NA	3.1	BLCA	neoplasm_histologic_grade	"Low Grade" vs "High Grade"	-0.181	0.00115	0.00228	0.9976
FAM73B_AD_87818	FAM73B	ENSG00000148343	chr9 | +	AD	15.2	16	15.3	BLCA	neoplasm_histologic_grade	"Low Grade" vs "High Grade"	0.1007	0.000891	0.00192	0.9929
FAM86C1_ES_17441	FAM86C1	ENSG00000158483	chr11 | +	ES	2	5.1	3.2	BLCA	neoplasm_histologic_grade	"Low Grade" vs "High Grade"	0.1094	0.000139	0.000489	0.9671
FARP2_AT_58380	FARP2	ENSG00000006607	chr2 | +	AT	NA	NA	18.2	BLCA	neoplasm_histologic_grade	"Low Grade" vs "High Grade"	-0.1536	0.000533	0.0013	0.9976
FARP2_AT_58381	FARP2	ENSG00000006607	chr2 | +	AT	NA	NA	28	BLCA	neoplasm_histologic_grade	"Low Grade" vs "High Grade"	0.1536	0.000533	0.0013	0.9976
FBLIM1_AP_769	FBLIM1	ENSG00000162458	chr1 | +	AP	NA	NA	3	BLCA	neoplasm_histologic_grade	"Low Grade" vs "High Grade"	-0.2319	0.00241	0.00401	0.9694
FBLIM1_AP_771	FBLIM1	ENSG00000162458	chr1 | +	AP	NA	NA	1	BLCA	neoplasm_histologic_grade	"Low Grade" vs "High Grade"	0.2762	0.00292	0.00468	0.9694
FBLN5_ES_28893	FBLN5	ENSG00000140092	chr14 | -	ES	5	8	7	BLCA	neoplasm_histologic_grade	"Low Grade" vs "High Grade"	0.1964	0.000872	0.00189	0.9976
FBXL22_AT_31065	FBXL22	ENSG00000197361	chr15 | +	AT	NA	NA	3	BLCA	neoplasm_histologic_grade	"Low Grade" vs "High Grade"	0.1221	0.000117	0.000431	0.9882
FBXL22_AT_31066	FBXL22	ENSG00000197361	chr15 | +	AT	NA	NA	2	BLCA	neoplasm_histologic_grade	"Low Grade" vs "High Grade"	-0.1221	0.000117	0.000431	0.9882
FBXO18_AP_10669	FBXO18	ENSG00000134452	chr10 | +	AP	NA	NA	1	BLCA	neoplasm_histologic_grade	"Low Grade" vs "High Grade"	0.1124	0.00224	0.00379	0.9788
FBXO44_ES_657	FBXO44	ENSG00000132879	chr1 | +	ES	5.1	7	5.2:6	BLCA	neoplasm_histologic_grade	"Low Grade" vs "High Grade"	0.1548	4.88e-07	1.1e-05	0.9929
FCER1G_AT_8599	FCER1G	ENSG00000158869	chr1 | +	AT	NA	NA	5	BLCA	neoplasm_histologic_grade	"Low Grade" vs "High Grade"	-0.1121	9.17e-07	1.43e-05	1
FCER1G_AT_8600	FCER1G	ENSG00000158869	chr1 | +	AT	NA	NA	6	BLCA	neoplasm_histologic_grade	"Low Grade" vs "High Grade"	0.1121	9.17e-07	1.43e-05	1
FMO5_AT_7368	FMO5	ENSG00000131781	chr1 | -	AT	NA	NA	10	BLCA	neoplasm_histologic_grade	"Low Grade" vs "High Grade"	0.1862	0.000404	0.00106	1
FNTB_AP_27914	FNTB	ENSG00000257365	chr14 | +	AP	NA	NA	1	BLCA	neoplasm_histologic_grade	"Low Grade" vs "High Grade"	0.1035	0.000237	0.000722	1
FNTB_AP_27915	FNTB	ENSG00000257365	chr14 | +	AP	NA	NA	4	BLCA	neoplasm_histologic_grade	"Low Grade" vs "High Grade"	-0.1035	0.000237	0.000722	1
FOS_AP_28489	FOS	ENSG00000170345	chr14 | +	AP	NA	NA	2.1	BLCA	neoplasm_histologic_grade	"Low Grade" vs "High Grade"	0.1387	8.21e-06	6.6e-05	1
FOS_AP_28490	FOS	ENSG00000170345	chr14 | +	AP	NA	NA	1	BLCA	neoplasm_histologic_grade	"Low Grade" vs "High Grade"	-0.1382	8.28e-06	6.6e-05	1
FOS_RI_28494	FOS	ENSG00000170345	chr14 | +	RI	2.4	2.6	2.5	BLCA	neoplasm_histologic_grade	"Low Grade" vs "High Grade"	0.1065	3.98e-06	3.82e-05	0.9976
FOS_RI_28499	FOS	ENSG00000170345	chr14 | +	RI	2.2	2.4	2.3	BLCA	neoplasm_histologic_grade	"Low Grade" vs "High Grade"	0.1332	9.62e-06	7.29e-05	0.9953
FOSB_AP_50448	FOSB	ENSG00000125740	chr19 | +	AP	NA	NA	1	BLCA	neoplasm_histologic_grade	"Low Grade" vs "High Grade"	-0.2401	5.44e-07	1.13e-05	0.9859
FOSB_AP_50449	FOSB	ENSG00000125740	chr19 | +	AP	NA	NA	2.1	BLCA	neoplasm_histologic_grade	"Low Grade" vs "High Grade"	0.2401	5.44e-07	1.13e-05	0.9859
FSD1L_AT_87121	FSD1L	ENSG00000106701	chr9 | +	AT	NA	NA	17	BLCA	neoplasm_histologic_grade	"Low Grade" vs "High Grade"	0.1302	0.000219	0.000678	0.9953
FUT3_ES_46944	FUT3	ENSG00000171124	chr19 | -	ES	1	3	2.1:2.2:2.3	BLCA	neoplasm_histologic_grade	"Low Grade" vs "High Grade"	0.1072	0.019	0.022	0.7694
FUT8_AP_28010	FUT8	ENSG00000033170	chr14 | +	AP	NA	NA	2	BLCA	neoplasm_histologic_grade	"Low Grade" vs "High Grade"	-0.2036	0.00812	0.011	0.9929
FUT8_AP_28012	FUT8	ENSG00000033170	chr14 | +	AP	NA	NA	1	BLCA	neoplasm_histologic_grade	"Low Grade" vs "High Grade"	0.2036	0.00812	0.011	0.9929
GAREML_AP_52882	GAREML	ENSG00000157833	chr2 | +	AP	NA	NA	1	BLCA	neoplasm_histologic_grade	"Low Grade" vs "High Grade"	-0.2913	0.00101	0.00208	1
GAREML_AP_52883	GAREML	ENSG00000157833	chr2 | +	AP	NA	NA	3	BLCA	neoplasm_histologic_grade	"Low Grade" vs "High Grade"	0.2913	0.00101	0.00208	1
GAS2L1_RI_61596	GAS2L1	ENSG00000185340	chr22 | +	RI	1.1	1.5	1.2:1.3:1.4	BLCA	neoplasm_histologic_grade	"Low Grade" vs "High Grade"	0.113	0.00366	0.00567	0.9435
GCFC2_AT_54158	GCFC2	ENSG00000005436	chr2 | -	AT	NA	NA	3.3	BLCA	neoplasm_histologic_grade	"Low Grade" vs "High Grade"	-0.1558	1.8e-07	5.34e-06	1
GCFC2_AT_54159	GCFC2	ENSG00000005436	chr2 | -	AT	NA	NA	17	BLCA	neoplasm_histologic_grade	"Low Grade" vs "High Grade"	0.1558	1.8e-07	5.34e-06	1
GCHFR_AP_30029	GCHFR	ENSG00000137880	chr15 | +	AP	NA	NA	1	BLCA	neoplasm_histologic_grade	"Low Grade" vs "High Grade"	-0.1037	0.00221	0.00377	1
GEMIN2_ES_27356	GEMIN2	ENSG00000092208	chr14 | +	ES	4	6	5	BLCA	neoplasm_histologic_grade	"Low Grade" vs "High Grade"	0.1625	0.000146	0.000509	1
GEMIN4_AP_38259	GEMIN4	ENSG00000179409	chr17 | -	AP	NA	NA	2.1	BLCA	neoplasm_histologic_grade	"Low Grade" vs "High Grade"	0.2188	0.000953	0.00199	0.9906
GEMIN4_AP_38260	GEMIN4	ENSG00000179409	chr17 | -	AP	NA	NA	1	BLCA	neoplasm_histologic_grade	"Low Grade" vs "High Grade"	-0.2188	0.000953	0.00199	0.9906
GET4_AP_78551	GET4	ENSG00000239857	chr7 | +	AP	NA	NA	1	BLCA	neoplasm_histologic_grade	"Low Grade" vs "High Grade"	-0.1774	0.000643	0.00149	1
GET4_AP_78552	GET4	ENSG00000239857	chr7 | +	AP	NA	NA	2.1	BLCA	neoplasm_histologic_grade	"Low Grade" vs "High Grade"	0.1774	0.000643	0.00149	1
GFOD1_AT_75387	GFOD1	ENSG00000145990	chr6 | -	AT	NA	NA	2	BLCA	neoplasm_histologic_grade	"Low Grade" vs "High Grade"	-0.1086	1.23e-06	1.69e-05	1
GFOD1_AT_75388	GFOD1	ENSG00000145990	chr6 | -	AT	NA	NA	4	BLCA	neoplasm_histologic_grade	"Low Grade" vs "High Grade"	0.1086	1.23e-06	1.69e-05	1
GGA3_RI_43399	GGA3	ENSG00000125447	chr17 | -	RI	14.1	14.3	14.2	BLCA	neoplasm_histologic_grade	"Low Grade" vs "High Grade"	0.2154	0.00387	0.00593	0.9835
GGT6_ES_38539	GGT6	ENSG00000167741	chr17 | -	ES	2.2	4	3.1:3.2	BLCA	neoplasm_histologic_grade	"Low Grade" vs "High Grade"	0.1065	0.00771	0.01	0.7929
GINS4_AT_83515	GINS4	ENSG00000147536	chr8 | +	AT	NA	NA	6.3	BLCA	neoplasm_histologic_grade	"Low Grade" vs "High Grade"	-0.1603	2.82e-06	3.06e-05	1
GINS4_AT_83516	GINS4	ENSG00000147536	chr8 | +	AT	NA	NA	3.2	BLCA	neoplasm_histologic_grade	"Low Grade" vs "High Grade"	0.1603	2.82e-06	3.06e-05	1
GK5_ES_67108	GK5	ENSG00000175066	chr3 | -	ES	9	11	10	BLCA	neoplasm_histologic_grade	"Low Grade" vs "High Grade"	0.2061	0.00059	0.0014	0.9976
GLS_AT_56589	GLS	ENSG00000115419	chr2 | +	AT	NA	NA	20	BLCA	neoplasm_histologic_grade	"Low Grade" vs "High Grade"	0.1702	1.56e-08	9.23e-07	1
GLS_AT_56590	GLS	ENSG00000115419	chr2 | +	AT	NA	NA	16	BLCA	neoplasm_histologic_grade	"Low Grade" vs "High Grade"	-0.1702	1.56e-08	9.23e-07	1
GNG5_RI_3606	GNG5	ENSG00000174021	chr1 | -	RI	1.1	1.3	1.2	BLCA	neoplasm_histologic_grade	"Low Grade" vs "High Grade"	0.106	0.023	0.027	0.9576
GNPDA1_RI_73862	GNPDA1	ENSG00000113552	chr5 | -	RI	2.4	2.6	2.5	BLCA	neoplasm_histologic_grade	"Low Grade" vs "High Grade"	0.228	0.00023	0.000709	0.7718
GPATCH2_AT_9838	GPATCH2	ENSG00000092978	chr1 | -	AT	NA	NA	11	BLCA	neoplasm_histologic_grade	"Low Grade" vs "High Grade"	0.2212	9.49e-07	1.43e-05	1
GPATCH2_AT_9839	GPATCH2	ENSG00000092978	chr1 | -	AT	NA	NA	6	BLCA	neoplasm_histologic_grade	"Low Grade" vs "High Grade"	-0.2212	9.49e-07	1.43e-05	1
GPHN_ES_28036	GPHN	ENSG00000171723	chr14 | +	ES	1	3	2	BLCA	neoplasm_histologic_grade	"Low Grade" vs "High Grade"	0.1369	0.00736	0.01	0.9953
GPR110_AT_76436	GPR110	ENSG00000153292	chr6 | -	AT	NA	NA	17	BLCA	neoplasm_histologic_grade	"Low Grade" vs "High Grade"	0.189	5.86e-08	2.36e-06	0.9718
GPR110_AT_76437	GPR110	ENSG00000153292	chr6 | -	AT	NA	NA	8	BLCA	neoplasm_histologic_grade	"Low Grade" vs "High Grade"	-0.189	5.86e-08	2.36e-06	0.9718
GPR116_ES_76429	GPR116	ENSG00000069122	chr6 | -	ES	21	23	22	BLCA	neoplasm_histologic_grade	"Low Grade" vs "High Grade"	0.1516	0.000115	0.000425	0.8871
GPS1_RI_44278	GPS1	ENSG00000169727	chr17 | +	RI	1.1	1.5	1.2:1.3:1.4	BLCA	neoplasm_histologic_grade	"Low Grade" vs "High Grade"	0.2462	0.00246	0.00406	0.9765
GSDMB_AP_40782	GSDMB	ENSG00000073605	chr17 | -	AP	NA	NA	2.1	BLCA	neoplasm_histologic_grade	"Low Grade" vs "High Grade"	-0.2475	0.01	0.013	0.9929
GSDMB_AP_40783	GSDMB	ENSG00000073605	chr17 | -	AP	NA	NA	1	BLCA	neoplasm_histologic_grade	"Low Grade" vs "High Grade"	0.2475	0.01	0.013	0.9929
GSK3A_AP_50137	GSK3A	ENSG00000105723	chr19 | -	AP	NA	NA	2.1	BLCA	neoplasm_histologic_grade	"Low Grade" vs "High Grade"	0.1203	0.00199	0.00348	1
GSK3A_AP_50138	GSK3A	ENSG00000105723	chr19 | -	AP	NA	NA	1	BLCA	neoplasm_histologic_grade	"Low Grade" vs "High Grade"	-0.1203	0.00199	0.00348	1
GSS_RI_59053	GSS	ENSG00000100983	chr20 | -	RI	5.1	5.3	5.2	BLCA	neoplasm_histologic_grade	"Low Grade" vs "High Grade"	0.1381	4.07e-06	3.87e-05	0.9976
GTF2H1_AP_14599	GTF2H1	ENSG00000110768	chr11 | +	AP	NA	NA	1	BLCA	neoplasm_histologic_grade	"Low Grade" vs "High Grade"	-0.2437	2.22e-05	0.000129	1
GTF2H1_AP_14601	GTF2H1	ENSG00000110768	chr11 | +	AP	NA	NA	9.1	BLCA	neoplasm_histologic_grade	"Low Grade" vs "High Grade"	0.1654	0.000583	0.00139	1
GTF3C2_AP_52979	GTF3C2	ENSG00000115207	chr2 | -	AP	NA	NA	2	BLCA	neoplasm_histologic_grade	"Low Grade" vs "High Grade"	0.1022	0.00102	0.00211	0.9859
GTF3C2_AP_52980	GTF3C2	ENSG00000115207	chr2 | -	AP	NA	NA	1	BLCA	neoplasm_histologic_grade	"Low Grade" vs "High Grade"	-0.1022	0.00102	0.00211	0.9859
GULP1_AT_56499	GULP1	ENSG00000144366	chr2 | +	AT	NA	NA	9.2	BLCA	neoplasm_histologic_grade	"Low Grade" vs "High Grade"	0.2258	8.67e-05	0.000337	1
GULP1_AT_56500	GULP1	ENSG00000144366	chr2 | +	AT	NA	NA	15	BLCA	neoplasm_histologic_grade	"Low Grade" vs "High Grade"	-0.2258	8.67e-05	0.000337	1
HARS_AP_73719	HARS	ENSG00000170445	chr5 | -	AP	NA	NA	1	BLCA	neoplasm_histologic_grade	"Low Grade" vs "High Grade"	-0.1094	0.011	0.014	1
HARS_AP_73720	HARS	ENSG00000170445	chr5 | -	AP	NA	NA	3.1	BLCA	neoplasm_histologic_grade	"Low Grade" vs "High Grade"	0.1094	0.011	0.014	1
HARS2_RI_73745	HARS2	ENSG00000112855	chr5 | +	RI	6.1	6.3	6.2	BLCA	neoplasm_histologic_grade	"Low Grade" vs "High Grade"	0.1565	0.019	0.023	0.9906
HAS3_AT_37253	HAS3	ENSG00000103044	chr16 | +	AT	NA	NA	6	BLCA	neoplasm_histologic_grade	"Low Grade" vs "High Grade"	0.1639	7.18e-05	0.000296	1
HAS3_AT_37254	HAS3	ENSG00000103044	chr16 | +	AT	NA	NA	7	BLCA	neoplasm_histologic_grade	"Low Grade" vs "High Grade"	-0.1639	7.18e-05	0.000296	1
HBS1L_AP_77782	HBS1L	ENSG00000112339	chr6 | -	AP	NA	NA	1	BLCA	neoplasm_histologic_grade	"Low Grade" vs "High Grade"	-0.2427	0.00173	0.00312	1
HBS1L_AP_77783	HBS1L	ENSG00000112339	chr6 | -	AP	NA	NA	6	BLCA	neoplasm_histologic_grade	"Low Grade" vs "High Grade"	0.2427	0.00171	0.00309	1
HDAC7_ES_21371	HDAC7	ENSG00000061273	chr12 | -	ES	10.2	12	11	BLCA	neoplasm_histologic_grade	"Low Grade" vs "High Grade"	0.1416	0.000471	0.00117	0.9929
HDAC8_AT_89459	HDAC8	ENSG00000147099	chrX | -	AT	NA	NA	14.2	BLCA	neoplasm_histologic_grade	"Low Grade" vs "High Grade"	0.1489	1.4e-05	9.22e-05	1
HDAC8_AT_89464	HDAC8	ENSG00000147099	chrX | -	AT	NA	NA	9	BLCA	neoplasm_histologic_grade	"Low Grade" vs "High Grade"	-0.1165	2.77e-05	0.00015	1
HDAC9_AT_78891	HDAC9	ENSG00000048052	chr7 | +	AT	NA	NA	16.2	BLCA	neoplasm_histologic_grade	"Low Grade" vs "High Grade"	-0.1064	0.000146	0.000509	0.9976
HDDC3_RI_32522	HDDC3	ENSG00000184508	chr15 | -	RI	3.1	3.3	3.2	BLCA	neoplasm_histologic_grade	"Low Grade" vs "High Grade"	0.1563	0.00134	0.00254	0.8871
HDHD3_AP_87276	HDHD3	ENSG00000119431	chr9 | -	AP	NA	NA	2.1	BLCA	neoplasm_histologic_grade	"Low Grade" vs "High Grade"	0.1324	0.000159	0.000533	1
HDHD3_AP_87277	HDHD3	ENSG00000119431	chr9 | -	AP	NA	NA	1	BLCA	neoplasm_histologic_grade	"Low Grade" vs "High Grade"	-0.1324	0.000159	0.000533	1
HEMK1_AD_65085	HEMK1	ENSG00000114735	chr3 | +	AD	1.3	2.1	1.4	BLCA	neoplasm_histologic_grade	"Low Grade" vs "High Grade"	0.1354	9.16e-06	7.05e-05	0.9012
HES2_AT_400	HES2	ENSG00000069812	chr1 | -	AT	NA	NA	4.3	BLCA	neoplasm_histologic_grade	"Low Grade" vs "High Grade"	-0.1423	0.00155	0.00284	1
HES2_AT_401	HES2	ENSG00000069812	chr1 | -	AT	NA	NA	5	BLCA	neoplasm_histologic_grade	"Low Grade" vs "High Grade"	0.1423	0.00155	0.00284	1
HEXIM2_AP_41949	HEXIM2	ENSG00000168517	chr17 | +	AP	NA	NA	1	BLCA	neoplasm_histologic_grade	"Low Grade" vs "High Grade"	0.1224	0.00612	0.00864	0.9953
HEXIM2_AP_41950	HEXIM2	ENSG00000168517	chr17 | +	AP	NA	NA	2.1	BLCA	neoplasm_histologic_grade	"Low Grade" vs "High Grade"	-0.1224	0.00612	0.00864	0.9953
HKR1_ES_49489	HKR1	ENSG00000181666	chr19 | +	ES	13	17.2	14:15:00	BLCA	neoplasm_histologic_grade	"Low Grade" vs "High Grade"	0.1044	0.00335	0.00525	0.9694
HM13_ES_58892	HM13	ENSG00000101294	chr20 | +	ES	10	13	11:12.1:12.2	BLCA	neoplasm_histologic_grade	"Low Grade" vs "High Grade"	0.2	0.00016	0.000536	0.9882
HM13_ES_58893	HM13	ENSG00000101294	chr20 | +	ES	10	13	00:11:12.100000	BLCA	neoplasm_histologic_grade	"Low Grade" vs "High Grade"	0.2214	0.00202	0.00352	0.9859
HMBS_RI_19098	HMBS	ENSG00000256269	chr11 | +	RI	12.1	12.3	12.2	BLCA	neoplasm_histologic_grade	"Low Grade" vs "High Grade"	0.128	6.76e-05	0.000283	1
HMGA1_AD_75774	HMGA1	ENSG00000137309	chr6 | +	AD	1.1	3.1	1.2:1.3	BLCA	neoplasm_histologic_grade	"Low Grade" vs "High Grade"	0.1135	0.0013	0.00249	0.9906
HMGA2_AT_22880	HMGA2	ENSG00000149948	chr12 | +	AT	NA	NA	10	BLCA	neoplasm_histologic_grade	"Low Grade" vs "High Grade"	-0.3613	0.00186	0.0033	0.9953
HMGA2_AT_22881	HMGA2	ENSG00000149948	chr12 | +	AT	NA	NA	9.3	BLCA	neoplasm_histologic_grade	"Low Grade" vs "High Grade"	0.5378	3.26e-05	0.000169	0.9953
HMGN1_AP_60607	HMGN1	ENSG00000205581	chr21 | -	AP	NA	NA	2	BLCA	neoplasm_histologic_grade	"Low Grade" vs "High Grade"	-0.1354	0.00138	0.0026	1
HMGN1_AP_60609	HMGN1	ENSG00000205581	chr21 | -	AP	NA	NA	8.1	BLCA	neoplasm_histologic_grade	"Low Grade" vs "High Grade"	0.1438	0.00094	0.00197	1
HNRNPA2B1_AA_79035	HNRNPA2B1	ENSG00000122566	chr7 | -	AA	11	12.4	12.2:12.3	BLCA	neoplasm_histologic_grade	"Low Grade" vs "High Grade"	0.173	3.07e-05	0.000162	0.9953
HNRNPA2B1_ES_79037	HNRNPA2B1	ENSG00000122566	chr7 | -	ES	11	12.4	12.2	BLCA	neoplasm_histologic_grade	"Low Grade" vs "High Grade"	0.2223	5.86e-05	0.000254	0.9953
HNRNPDL_ES_69705	HNRNPDL	ENSG00000152795	chr4 | -	ES	7	9	8	BLCA	neoplasm_histologic_grade	"Low Grade" vs "High Grade"	0.1073	0.00659	0.00917	1
HNRNPF_AP_11325	HNRNPF	ENSG00000169813	chr10 | -	AP	NA	NA	3	BLCA	neoplasm_histologic_grade	"Low Grade" vs "High Grade"	-0.142	1.98e-07	5.57e-06	0.9976
HNRNPF_AP_11326	HNRNPF	ENSG00000169813	chr10 | -	AP	NA	NA	5.1	BLCA	neoplasm_histologic_grade	"Low Grade" vs "High Grade"	0.1482	6.17e-07	1.23e-05	0.9976
HOMER3_AP_48535	HOMER3	ENSG00000051128	chr19 | -	AP	NA	NA	1	BLCA	neoplasm_histologic_grade	"Low Grade" vs "High Grade"	-0.1514	0.000286	0.000816	1
HOOK2_AD_47868	HOOK2	ENSG00000095066	chr19 | -	AD	4.1	5	4.2	BLCA	neoplasm_histologic_grade	"Low Grade" vs "High Grade"	0.2433	0.000149	0.000514	0.9812
HOXD3_AP_56114	HOXD3	ENSG00000128652	chr2 | +	AP	NA	NA	4	BLCA	neoplasm_histologic_grade	"Low Grade" vs "High Grade"	0.1918	0.00296	0.00473	0.9459
HOXD3_AP_56116	HOXD3	ENSG00000128652	chr2 | +	AP	NA	NA	1	BLCA	neoplasm_histologic_grade	"Low Grade" vs "High Grade"	-0.2328	0.000554	0.00134	0.9459
HP1BP3_AP_937	HP1BP3	ENSG00000127483	chr1 | -	AP	NA	NA	7.1	BLCA	neoplasm_histologic_grade	"Low Grade" vs "High Grade"	0.1181	0.00581	0.00828	1
HPS4_RI_61502	HPS4	ENSG00000100099	chr22 | -	RI	10.3	10.5	10.4	BLCA	neoplasm_histologic_grade	"Low Grade" vs "High Grade"	0.1798	6.43e-05	0.000273	0.9624
HPS4_RI_61504	HPS4	ENSG00000100099	chr22 | -	RI	10.1	10.5	10.2:10.3:10.4	BLCA	neoplasm_histologic_grade	"Low Grade" vs "High Grade"	0.3066	0.000575	0.00138	0.9506
HRAS_ES_13685	HRAS	ENSG00000174775	chr11 | -	ES	5	7.1	6	BLCA	neoplasm_histologic_grade	"Low Grade" vs "High Grade"	0.1863	0.000332	0.000912	1
HSPA14_AT_10830	HSPA14	ENSG00000187522	chr10 | +	AT	NA	NA	15	BLCA	neoplasm_histologic_grade	"Low Grade" vs "High Grade"	0.1199	0.00962	0.013	1
HSPA14_AT_10831	HSPA14	ENSG00000187522	chr10 | +	AT	NA	NA	4	BLCA	neoplasm_histologic_grade	"Low Grade" vs "High Grade"	-0.1199	0.00962	0.013	1
HYLS1_AP_19361	HYLS1	ENSG00000198331	chr11 | +	AP	NA	NA	1	BLCA	neoplasm_histologic_grade	"Low Grade" vs "High Grade"	0.1364	0.000241	0.00073	0.9976
HYLS1_AP_19362	HYLS1	ENSG00000198331	chr11 | +	AP	NA	NA	2	BLCA	neoplasm_histologic_grade	"Low Grade" vs "High Grade"	-0.1198	0.000319	0.000883	0.9976
HYPK_AP_30317	HYPK	ENSG00000242028	chr15 | +	AP	NA	NA	2.1	BLCA	neoplasm_histologic_grade	"Low Grade" vs "High Grade"	0.153	0.000155	0.000528	1
HYPK_AP_30319	HYPK	ENSG00000242028	chr15 | +	AP	NA	NA	1	BLCA	neoplasm_histologic_grade	"Low Grade" vs "High Grade"	-0.1653	9.46e-05	0.000365	1
ICAM3_RI_47503	ICAM3	ENSG00000076662	chr19 | -	RI	3.1	3.3	3.2	BLCA	neoplasm_histologic_grade	"Low Grade" vs "High Grade"	0.2781	0.000631	0.00148	1
IDS_AP_90286	IDS	ENSG00000010404	chrX | -	AP	NA	NA	1	BLCA	neoplasm_histologic_grade	"Low Grade" vs "High Grade"	0.2989	0.000316	0.00088	1
IDS_AP_90287	IDS	ENSG00000010404	chrX | -	AP	NA	NA	4	BLCA	neoplasm_histologic_grade	"Low Grade" vs "High Grade"	-0.2989	0.000316	0.00088	1
IDS_AT_90291	IDS	ENSG00000010404	chrX | -	AT	NA	NA	14	BLCA	neoplasm_histologic_grade	"Low Grade" vs "High Grade"	-0.1163	0.016	0.019	1
IDUA_AP_68439	IDUA	ENSG00000127415	chr4 | +	AP	NA	NA	3	BLCA	neoplasm_histologic_grade	"Low Grade" vs "High Grade"	0.1496	0.00159	0.0029	0.9624
IDUA_AP_68440	IDUA	ENSG00000127415	chr4 | +	AP	NA	NA	1	BLCA	neoplasm_histologic_grade	"Low Grade" vs "High Grade"	-0.1496	0.00159	0.0029	0.9624
IFITM2_AP_13641	IFITM2	ENSG00000185201	chr11 | +	AP	NA	NA	1	BLCA	neoplasm_histologic_grade	"Low Grade" vs "High Grade"	0.1012	1.92e-05	0.00012	1
IFITM2_AP_13642	IFITM2	ENSG00000185201	chr11 | +	AP	NA	NA	2.1	BLCA	neoplasm_histologic_grade	"Low Grade" vs "High Grade"	-0.1012	1.92e-05	0.00012	1
IFNAR1_AP_60398	IFNAR1	ENSG00000142166	chr21 | +	AP	NA	NA	1	BLCA	neoplasm_histologic_grade	"Low Grade" vs "High Grade"	0.1894	0.0077	0.01	1
IFNAR1_AP_60399	IFNAR1	ENSG00000142166	chr21 | +	AP	NA	NA	2	BLCA	neoplasm_histologic_grade	"Low Grade" vs "High Grade"	-0.1894	0.0077	0.01	1
IFNAR2_AA_60390	IFNAR2	ENSG00000159110	chr21 | +	AA	9	10.2	10.1	BLCA	neoplasm_histologic_grade	"Low Grade" vs "High Grade"	0.1181	0.011	0.015	1
IL18BP_RI_17481	IL18BP	ENSG00000137496	chr11 | +	RI	1.6	1.8	1.7	BLCA	neoplasm_histologic_grade	"Low Grade" vs "High Grade"	0.1596	0.019	0.022	0.9718
IL1RAP_AT_68105	IL1RAP	ENSG00000196083	chr3 | +	AT	NA	NA	10.2	BLCA	neoplasm_histologic_grade	"Low Grade" vs "High Grade"	-0.1043	6.55e-08	2.46e-06	1
ING1_AP_26266	ING1	ENSG00000153487	chr13 | +	AP	NA	NA	3	BLCA	neoplasm_histologic_grade	"Low Grade" vs "High Grade"	-0.1096	0.00716	0.00986	0.9976
ING1_AP_26267	ING1	ENSG00000153487	chr13 | +	AP	NA	NA	2.1	BLCA	neoplasm_histologic_grade	"Low Grade" vs "High Grade"	0.1438	0.0022	0.00376	0.9976
ING3_RI_81588	ING3	ENSG00000071243	chr7 | +	RI	4.1	4.3	4.2	BLCA	neoplasm_histologic_grade	"Low Grade" vs "High Grade"	0.1937	0.00146	0.00272	0.9576
INO80E_ES_36009	INO80E	ENSG00000169592	chr16 | +	ES	5	11	6.1:6.2:6.3:7:8:9:10	BLCA	neoplasm_histologic_grade	"Low Grade" vs "High Grade"	0.1984	0.00425	0.00636	0.9741
INO80E_ES_36010	INO80E	ENSG00000169592	chr16 | +	ES	5	11	6.2:6.3:7:8:9:10	BLCA	neoplasm_histologic_grade	"Low Grade" vs "High Grade"	0.2755	0.00402	0.00612	0.9741
INO80E_ES_36012	INO80E	ENSG00000169592	chr16 | +	ES	5	11	6.1:6.2:6.3:10	BLCA	neoplasm_histologic_grade	"Low Grade" vs "High Grade"	0.2714	1.26e-06	1.69e-05	0.9882
INO80E_ES_36013	INO80E	ENSG00000169592	chr16 | +	ES	5	11	6.2:6.3:10	BLCA	neoplasm_histologic_grade	"Low Grade" vs "High Grade"	0.2142	8.93e-06	6.98e-05	0.9929
INO80E_ES_36015	INO80E	ENSG00000169592	chr16 | +	ES	5	11	6.1:6.2:6.3	BLCA	neoplasm_histologic_grade	"Low Grade" vs "High Grade"	0.1966	1.35e-05	9e-05	0.9953
INTU_AA_70537	INTU	ENSG00000164066	chr4 | +	AA	9	10.3	10.1:10.2	BLCA	neoplasm_histologic_grade	"Low Grade" vs "High Grade"	0.1532	0.012	0.015	0.9482
IP6K2_AA_64751	IP6K2	ENSG00000068745	chr3 | -	AA	11.2	11.7	11.4:11.5:11.6	BLCA	neoplasm_histologic_grade	"Low Grade" vs "High Grade"	-0.3785	4.96e-06	4.51e-05	0.9812
IP6K2_AA_64755	IP6K2	ENSG00000068745	chr3 | -	AA	11.2	11.9	11.7:11.8	BLCA	neoplasm_histologic_grade	"Low Grade" vs "High Grade"	0.1979	4.33e-06	4.09e-05	0.9741
IP6K2_AD_64746	IP6K2	ENSG00000068745	chr3 | -	AD	11.5	11.9	11.6:11.7	BLCA	neoplasm_histologic_grade	"Low Grade" vs "High Grade"	0.4003	3.42e-05	0.000176	0.9788
IP6K2_AD_64748	IP6K2	ENSG00000068745	chr3 | -	AD	11.4	11.9	11.5:11.6:11.7	BLCA	neoplasm_histologic_grade	"Low Grade" vs "High Grade"	0.1079	0.00486	0.0071	0.9388
IP6K2_AD_64756	IP6K2	ENSG00000068745	chr3 | -	AD	11.2	11.9	11.3:11.4:11.5:11.6:11.7	BLCA	neoplasm_histologic_grade	"Low Grade" vs "High Grade"	0.3426	4.83e-05	0.000223	0.9859
IP6K2_AT_64742	IP6K2	ENSG00000068745	chr3 | -	AT	NA	NA	15	BLCA	neoplasm_histologic_grade	"Low Grade" vs "High Grade"	-0.1376	2.13e-05	0.000128	1
IP6K2_AT_64743	IP6K2	ENSG00000068745	chr3 | -	AT	NA	NA	11.9	BLCA	neoplasm_histologic_grade	"Low Grade" vs "High Grade"	0.1376	2.13e-05	0.000128	1
IP6K2_ES_64758	IP6K2	ENSG00000068745	chr3 | -	ES	11.2	11.9	11.7	BLCA	neoplasm_histologic_grade	"Low Grade" vs "High Grade"	0.2746	1.28e-05	8.71e-05	0.9647
IP6K2_ES_64760	IP6K2	ENSG00000068745	chr3 | -	ES	11.2	11.9	11.4:11.5	BLCA	neoplasm_histologic_grade	"Low Grade" vs "High Grade"	-0.1117	0.000436	0.00112	0.9859
IP6K2_RI_64744	IP6K2	ENSG00000068745	chr3 | -	RI	11.7	11.9	11.8	BLCA	neoplasm_histologic_grade	"Low Grade" vs "High Grade"	-0.2876	0.00032	0.000883	0.9882
IP6K2_RI_64745	IP6K2	ENSG00000068745	chr3 | -	RI	11.5	11.9	11.6:11.7:11.8	BLCA	neoplasm_histologic_grade	"Low Grade" vs "High Grade"	0.1434	0.000279	0.00081	0.9906
IP6K2_RI_64750	IP6K2	ENSG00000068745	chr3 | -	RI	11.2	11.7	11.3:11.4:11.5:11.6	BLCA	neoplasm_histologic_grade	"Low Grade" vs "High Grade"	-0.1495	0.000674	0.00155	0.9812
IPO13_AP_2491	IPO13	ENSG00000117408	chr1 | +	AP	NA	NA	16.1	BLCA	neoplasm_histologic_grade	"Low Grade" vs "High Grade"	0.2557	0.000277	0.000807	1
IPO13_AP_2492	IPO13	ENSG00000117408	chr1 | +	AP	NA	NA	1	BLCA	neoplasm_histologic_grade	"Low Grade" vs "High Grade"	-0.2557	0.000277	0.000807	1
IQCC_AD_1564	IQCC	ENSG00000160051	chr1 | +	AD	1.1	2	1.2	BLCA	neoplasm_histologic_grade	"Low Grade" vs "High Grade"	0.3011	9.22e-06	7.05e-05	0.8306
IQCG_AP_68330	IQCG	ENSG00000114473	chr3 | -	AP	NA	NA	3	BLCA	neoplasm_histologic_grade	"Low Grade" vs "High Grade"	-0.1522	0.00246	0.00406	0.9435
IQCG_AP_68331	IQCG	ENSG00000114473	chr3 | -	AP	NA	NA	1	BLCA	neoplasm_histologic_grade	"Low Grade" vs "High Grade"	0.1522	0.00246	0.00406	0.9435
IQCH_AT_31311	IQCH	ENSG00000103599	chr15 | +	AT	NA	NA	24	BLCA	neoplasm_histologic_grade	"Low Grade" vs "High Grade"	0.1126	0.00149	0.00277	0.9882
IREB2_RI_32090	IREB2	ENSG00000136381	chr15 | +	RI	8.1	8.3	8.2	BLCA	neoplasm_histologic_grade	"Low Grade" vs "High Grade"	0.2791	0.016	0.019	1
IRF3_AD_51023	IRF3	ENSG00000126456	chr19 | -	AD	1.1	2	1.2:1.3:1.4:1.5	BLCA	neoplasm_histologic_grade	"Low Grade" vs "High Grade"	0.318	1.91e-05	0.000119	0.8965
IRF3_ES_51008	IRF3	ENSG00000126456	chr19 | -	ES	1.1	3	1.2:1.3:1.4:1.5:2	BLCA	neoplasm_histologic_grade	"Low Grade" vs "High Grade"	0.3052	0.000463	0.00116	0.9271
IRF3_RI_51030	IRF3	ENSG00000126456	chr19 | -	RI	1.1	1.5	1.2:1.3:1.4	BLCA	neoplasm_histologic_grade	"Low Grade" vs "High Grade"	0.3297	0.00106	0.00215	0.9153
IRF3_RI_51033	IRF3	ENSG00000126456	chr19 | -	RI	1.1	1.4	1.2:1.3	BLCA	neoplasm_histologic_grade	"Low Grade" vs "High Grade"	0.2019	2.89e-06	3.11e-05	1
IRF5_ES_81735	IRF5	ENSG00000128604	chr7 | +	ES	4	6.1	5	BLCA	neoplasm_histologic_grade	"Low Grade" vs "High Grade"	0.1214	0.00176	0.00314	0.9388
ISOC2_ES_52105	ISOC2	ENSG00000063241	chr19 | -	ES	2	4.2	00:03:04.100000	BLCA	neoplasm_histologic_grade	"Low Grade" vs "High Grade"	0.2814	7.98e-06	6.48e-05	0.9953
IST1_AP_37509	IST1	ENSG00000182149	chr16 | +	AP	NA	NA	5	BLCA	neoplasm_histologic_grade	"Low Grade" vs "High Grade"	-0.1509	0.00325	0.00511	1
IST1_AP_37514	IST1	ENSG00000182149	chr16 | +	AP	NA	NA	3	BLCA	neoplasm_histologic_grade	"Low Grade" vs "High Grade"	0.1318	0.000962	0.00201	1
IST1_ES_37517	IST1	ENSG00000182149	chr16 | +	ES	12	14.1	13	BLCA	neoplasm_histologic_grade	"Low Grade" vs "High Grade"	0.1398	0.00233	0.00391	0.9953
IST1_ES_37518	IST1	ENSG00000182149	chr16 | +	ES	11	14.1	12:13:00	BLCA	neoplasm_histologic_grade	"Low Grade" vs "High Grade"	0.1272	2.73e-06	3.05e-05	0.9788
ISY1_ES_66700	ISY1	ENSG00000240682	chr3 | -	ES	8	10.1	9	BLCA	neoplasm_histologic_grade	"Low Grade" vs "High Grade"	0.1506	8.28e-06	6.6e-05	1
ITCH_ES_59022	ITCH	ENSG00000078747	chr20 | +	ES	6	8	7	BLCA	neoplasm_histologic_grade	"Low Grade" vs "High Grade"	0.1725	0.000148	0.000511	0.9506
ITGB1BP1_AA_52617	ITGB1BP1	ENSG00000119185	chr2 | -	AA	7	8.3	8.1:8.2	BLCA	neoplasm_histologic_grade	"Low Grade" vs "High Grade"	0.2046	5.08e-05	0.000232	1
IYD_AT_78139	IYD	ENSG00000009765	chr6 | +	AT	NA	NA	7	BLCA	neoplasm_histologic_grade	"Low Grade" vs "High Grade"	0.1473	0.024	0.028	1
IYD_AT_78140	IYD	ENSG00000009765	chr6 | +	AT	NA	NA	6.4	BLCA	neoplasm_histologic_grade	"Low Grade" vs "High Grade"	-0.1473	0.024	0.028	1
JMJD6_ES_43621	JMJD6	ENSG00000070495	chr17 | -	ES	4	6	5.1:5.2	BLCA	neoplasm_histologic_grade	"Low Grade" vs "High Grade"	0.1394	7.88e-05	0.000316	1
JOSD2_AP_51203	JOSD2	ENSG00000161677	chr19 | -	AP	NA	NA	1	BLCA	neoplasm_histologic_grade	"Low Grade" vs "High Grade"	-0.1233	4.94e-06	4.51e-05	0.9976
JOSD2_AP_51204	JOSD2	ENSG00000161677	chr19 | -	AP	NA	NA	2	BLCA	neoplasm_histologic_grade	"Low Grade" vs "High Grade"	0.1233	4.94e-06	4.51e-05	0.9976
KAZN_AT_733	KAZN	ENSG00000189337	chr1 | +	AT	NA	NA	11.2	BLCA	neoplasm_histologic_grade	"Low Grade" vs "High Grade"	-0.2701	7.49e-07	1.33e-05	1
KAZN_AT_734	KAZN	ENSG00000189337	chr1 | +	AT	NA	NA	18	BLCA	neoplasm_histologic_grade	"Low Grade" vs "High Grade"	0.2701	7.49e-07	1.33e-05	1
KCTD7_ES_79882	KCTD7	ENSG00000243335	chr7 | +	ES	12	14	13	BLCA	neoplasm_histologic_grade	"Low Grade" vs "High Grade"	0.2096	0.000697	0.00159	0.9882
KDM5B_ES_9420	KDM5B	ENSG00000117139	chr1 | -	ES	5	7	6	BLCA	neoplasm_histologic_grade	"Low Grade" vs "High Grade"	0.2204	0.037	0.041	1
KIAA0895_AT_79246	KIAA0895	ENSG00000164542	chr7 | -	AT	NA	NA	4.2	BLCA	neoplasm_histologic_grade	"Low Grade" vs "High Grade"	0.1042	0.000272	0.000796	1
KIAA0895_AT_79247	KIAA0895	ENSG00000164542	chr7 | -	AT	NA	NA	9	BLCA	neoplasm_histologic_grade	"Low Grade" vs "High Grade"	-0.1042	0.000272	0.000796	1
KIAA0907_RI_8136	KIAA0907	ENSG00000132680	chr1 | -	RI	13.1	13.3	13.2	BLCA	neoplasm_histologic_grade	"Low Grade" vs "High Grade"	0.1416	0.00133	0.00253	1
KIAA1328_AP_45278	KIAA1328	ENSG00000150477	chr18 | +	AP	NA	NA	2	BLCA	neoplasm_histologic_grade	"Low Grade" vs "High Grade"	0.1138	0.000607	0.00143	0.9906
KIF13A_ES_75457	KIF13A	ENSG00000137177	chr6 | -	ES	39	41.1	40	BLCA	neoplasm_histologic_grade	"Low Grade" vs "High Grade"	0.1188	2.17e-05	0.000129	0.9835
KIF3C_ES_52880	KIF3C	ENSG00000084731	chr2 | -	ES	5	8	6	BLCA	neoplasm_histologic_grade	"Low Grade" vs "High Grade"	0.1567	0.00335	0.00525	0.9718
KIF4A_AT_89372	KIF4A	ENSG00000090889	chrX | +	AT	NA	NA	29	BLCA	neoplasm_histologic_grade	"Low Grade" vs "High Grade"	0.1325	3.39e-06	3.43e-05	1
KIF4A_AT_89373	KIF4A	ENSG00000090889	chrX | +	AT	NA	NA	32	BLCA	neoplasm_histologic_grade	"Low Grade" vs "High Grade"	-0.1325	3.39e-06	3.43e-05	1
KIFC3_ES_36615	KIFC3	ENSG00000140859	chr16 | -	ES	5	13	7	BLCA	neoplasm_histologic_grade	"Low Grade" vs "High Grade"	0.225	0.000901	0.00193	0.9176
KLC1_ES_29469	KLC1	ENSG00000126214	chr14 | +	ES	15	18	16	BLCA	neoplasm_histologic_grade	"Low Grade" vs "High Grade"	0.1379	0.00418	0.00628	0.9953
KLC1_ES_29485	KLC1	ENSG00000126214	chr14 | +	ES	13.2	18	13.3:15	BLCA	neoplasm_histologic_grade	"Low Grade" vs "High Grade"	-0.1109	0.00175	0.00314	1
KLC2_AP_16988	KLC2	ENSG00000174996	chr11 | +	AP	NA	NA	2	BLCA	neoplasm_histologic_grade	"Low Grade" vs "High Grade"	-0.1148	0.00119	0.00233	0.9976
KLC2_AP_16990	KLC2	ENSG00000174996	chr11 | +	AP	NA	NA	4.1	BLCA	neoplasm_histologic_grade	"Low Grade" vs "High Grade"	0.117	0.012	0.016	0.9976
KLHDC2_RI_27443	KLHDC2	ENSG00000165516	chr14 | +	RI	7.1	7.3	7.2	BLCA	neoplasm_histologic_grade	"Low Grade" vs "High Grade"	0.2116	4.28e-05	0.000206	1
KLHL21_RI_482	KLHL21	ENSG00000162413	chr1 | -	RI	4.1	4.4	4.2:4.3	BLCA	neoplasm_histologic_grade	"Low Grade" vs "High Grade"	0.2213	0.00135	0.00256	1
KLHL3_AT_73481	KLHL3	ENSG00000146021	chr5 | -	AT	NA	NA	18	BLCA	neoplasm_histologic_grade	"Low Grade" vs "High Grade"	0.1146	0.000917	0.00195	1
KLHL3_AT_73482	KLHL3	ENSG00000146021	chr5 | -	AT	NA	NA	11	BLCA	neoplasm_histologic_grade	"Low Grade" vs "High Grade"	-0.1146	0.000917	0.00195	1
KLHL5_AT_69041	KLHL5	ENSG00000109790	chr4 | +	AT	NA	NA	11.2	BLCA	neoplasm_histologic_grade	"Low Grade" vs "High Grade"	0.1008	2.71e-05	0.000147	1
KLHL7_AT_78950	KLHL7	ENSG00000122550	chr7 | +	AT	NA	NA	14	BLCA	neoplasm_histologic_grade	"Low Grade" vs "High Grade"	0.1918	3.54e-07	8.43e-06	1
KLHL7_AT_78952	KLHL7	ENSG00000122550	chr7 | +	AT	NA	NA	7	BLCA	neoplasm_histologic_grade	"Low Grade" vs "High Grade"	-0.1738	2.62e-07	6.82e-06	1
KXD1_AP_48453	KXD1	ENSG00000105700	chr19 | +	AP	NA	NA	1.1	BLCA	neoplasm_histologic_grade	"Low Grade" vs "High Grade"	-0.1594	0.00104	0.00212	1
KXD1_AP_48456	KXD1	ENSG00000105700	chr19 | +	AP	NA	NA	4.1	BLCA	neoplasm_histologic_grade	"Low Grade" vs "High Grade"	0.1293	1.81e-05	0.000114	1
LARGE_AP_61939	LARGE	ENSG00000133424	chr22 | -	AP	NA	NA	2	BLCA	neoplasm_histologic_grade	"Low Grade" vs "High Grade"	-0.1607	0.00414	0.00624	0.8471
LARGE_AP_61941	LARGE	ENSG00000133424	chr22 | -	AP	NA	NA	1	BLCA	neoplasm_histologic_grade	"Low Grade" vs "High Grade"	0.1607	0.00368	0.00569	0.8471
LARP1B_AT_70567	LARP1B	ENSG00000138709	chr4 | +	AT	NA	NA	21	BLCA	neoplasm_histologic_grade	"Low Grade" vs "High Grade"	0.1223	1.02e-07	3.51e-06	1
LBH_ES_53112	LBH	ENSG00000213626	chr2 | +	ES	3.1	5	4	BLCA	neoplasm_histologic_grade	"Low Grade" vs "High Grade"	0.1449	0.000347	0.000944	1
LDLRAD3_ES_15419	LDLRAD3	ENSG00000179241	chr11 | +	ES	4	6	5	BLCA	neoplasm_histologic_grade	"Low Grade" vs "High Grade"	0.1039	2.25e-05	0.000129	1
LEMD2_AP_75766	LEMD2	ENSG00000161904	chr6 | -	AP	NA	NA	1.1	BLCA	neoplasm_histologic_grade	"Low Grade" vs "High Grade"	-0.2262	6.81e-05	0.000283	0.9906
LEMD2_AP_75767	LEMD2	ENSG00000161904	chr6 | -	AP	NA	NA	2.1	BLCA	neoplasm_histologic_grade	"Low Grade" vs "High Grade"	0.2262	6.81e-05	0.000283	0.9906
LEPRE1_RI_2106	LEPRE1	ENSG00000117385	chr1 | -	RI	14.2	14.4	14.3	BLCA	neoplasm_histologic_grade	"Low Grade" vs "High Grade"	0.2007	0.000859	0.00188	1
LFNG_AP_78615	LFNG	ENSG00000106003	chr7 | +	AP	NA	NA	3	BLCA	neoplasm_histologic_grade	"Low Grade" vs "High Grade"	0.1032	6.57e-07	1.27e-05	0.9412
LFNG_AP_78616	LFNG	ENSG00000106003	chr7 | +	AP	NA	NA	5	BLCA	neoplasm_histologic_grade	"Low Grade" vs "High Grade"	-0.253	1.58e-08	9.23e-07	0.9412
LGALS3BP_ES_43932	LGALS3BP	ENSG00000108679	chr17 | -	ES	4.2	6	5.1:5.2:5.3:5.4	BLCA	neoplasm_histologic_grade	"Low Grade" vs "High Grade"	0.158	0.00396	0.00603	0.8729
LIMA1_AP_21688	LIMA1	ENSG00000050405	chr12 | -	AP	NA	NA	4.1	BLCA	neoplasm_histologic_grade	"Low Grade" vs "High Grade"	-0.1407	0.017	0.02	1
LIMA1_AP_21689	LIMA1	ENSG00000050405	chr12 | -	AP	NA	NA	7.1	BLCA	neoplasm_histologic_grade	"Low Grade" vs "High Grade"	0.2179	0.00548	0.00787	1
LIMS3L_AT_54936	LIMS3L	ENSG00000256671	chr2 | -	AT	NA	NA	3	BLCA	neoplasm_histologic_grade	"Low Grade" vs "High Grade"	-0.1844	1.8e-06	2.18e-05	0.9224
LIMS3L_AT_54938	LIMS3L	ENSG00000256671	chr2 | -	AT	NA	NA	19	BLCA	neoplasm_histologic_grade	"Low Grade" vs "High Grade"	0.1844	1.8e-06	2.18e-05	0.9224
LMF2_AA_62836	LMF2	ENSG00000100258	chr22 | -	AA	1	2.2	2.1	BLCA	neoplasm_histologic_grade	"Low Grade" vs "High Grade"	0.1769	0.000185	0.000602	0.9882
LMO4_AP_3694	LMO4	ENSG00000143013	chr1 | +	AP	NA	NA	1	BLCA	neoplasm_histologic_grade	"Low Grade" vs "High Grade"	-0.1196	1.06e-05	7.72e-05	0.9976
LMO4_AP_3695	LMO4	ENSG00000143013	chr1 | +	AP	NA	NA	2	BLCA	neoplasm_histologic_grade	"Low Grade" vs "High Grade"	0.1196	1.06e-05	7.72e-05	0.9976
LRP11_AP_78119	LRP11	ENSG00000120256	chr6 | -	AP	NA	NA	1	BLCA	neoplasm_histologic_grade	"Low Grade" vs "High Grade"	0.1421	0.035	0.04	0.9553
LRP11_AP_78120	LRP11	ENSG00000120256	chr6 | -	AP	NA	NA	2	BLCA	neoplasm_histologic_grade	"Low Grade" vs "High Grade"	-0.1421	0.035	0.04	0.9553
LRRC27_AT_13493	LRRC27	ENSG00000148814	chr10 | +	AT	NA	NA	18	BLCA	neoplasm_histologic_grade	"Low Grade" vs "High Grade"	-0.1754	2.49e-05	0.00014	1
LRRC29_AP_36979	LRRC29	ENSG00000125122	chr16 | -	AP	NA	NA	1	BLCA	neoplasm_histologic_grade	"Low Grade" vs "High Grade"	0.1577	0.017	0.021	0.8682
LRRC29_AP_36980	LRRC29	ENSG00000125122	chr16 | -	AP	NA	NA	4.1	BLCA	neoplasm_histologic_grade	"Low Grade" vs "High Grade"	0.1024	0.019	0.022	0.8682
LRRC29_AP_36981	LRRC29	ENSG00000125122	chr16 | -	AP	NA	NA	2	BLCA	neoplasm_histologic_grade	"Low Grade" vs "High Grade"	-0.1562	0.000176	0.000573	0.8682
LRRFIP2_ES_63960	LRRFIP2	ENSG00000093167	chr3 | -	ES	19	21	20	BLCA	neoplasm_histologic_grade	"Low Grade" vs "High Grade"	-0.1288	0.00315	0.00497	0.9859
LSMD1_AP_39058	LSMD1	ENSG00000183011	chr17 | -	AP	NA	NA	1	BLCA	neoplasm_histologic_grade	"Low Grade" vs "High Grade"	0.1189	0.003	0.00477	1
LSMD1_AP_39059	LSMD1	ENSG00000183011	chr17 | -	AP	NA	NA	5.1	BLCA	neoplasm_histologic_grade	"Low Grade" vs "High Grade"	-0.1347	0.0034	0.00531	1
LTBP3_ES_16865	LTBP3	ENSG00000168056	chr11 | -	ES	24	26	25	BLCA	neoplasm_histologic_grade	"Low Grade" vs "High Grade"	0.1604	0.000552	0.00134	0.9953
LTBR_ES_19852	LTBR	ENSG00000111321	chr12 | +	ES	7	10	00:08:09.100000	BLCA	neoplasm_histologic_grade	"Low Grade" vs "High Grade"	0.1456	0.00131	0.00251	0.9906
LUC7L_AD_32845	LUC7L	ENSG00000007392	chr16 | -	AD	1.3	2.2	1.4	BLCA	neoplasm_histologic_grade	"Low Grade" vs "High Grade"	0.103	0.00838	0.011	0.9859
LUC7L_AD_32847	LUC7L	ENSG00000007392	chr16 | -	AD	1.1	2.2	1.2:1.3:1.4	BLCA	neoplasm_histologic_grade	"Low Grade" vs "High Grade"	0.2658	0.00013	0.00047	0.9859
LUC7L_AP_32836	LUC7L	ENSG00000007392	chr16 | -	AP	NA	NA	1.1	BLCA	neoplasm_histologic_grade	"Low Grade" vs "High Grade"	-0.1993	7.64e-06	6.29e-05	1
LUC7L_AP_32837	LUC7L	ENSG00000007392	chr16 | -	AP	NA	NA	2.1	BLCA	neoplasm_histologic_grade	"Low Grade" vs "High Grade"	0.1993	7.64e-06	6.29e-05	1
LUC7L_ES_32844	LUC7L	ENSG00000007392	chr16 | -	ES	3	5	4	BLCA	neoplasm_histologic_grade	"Low Grade" vs "High Grade"	0.1492	0.000464	0.00116	1
LUC7L_ES_32848	LUC7L	ENSG00000007392	chr16 | -	ES	1.1	2.2	1.3:1.4	BLCA	neoplasm_histologic_grade	"Low Grade" vs "High Grade"	0.2324	0.00213	0.00365	0.9812
LY75_AT_55707	LY75	ENSG00000054219	chr2 | -	AT	NA	NA	40	BLCA	neoplasm_histologic_grade	"Low Grade" vs "High Grade"	-0.2312	4.72e-09	4.31e-07	1
LY75_AT_55708	LY75	ENSG00000054219	chr2 | -	AT	NA	NA	35	BLCA	neoplasm_histologic_grade	"Low Grade" vs "High Grade"	0.2312	4.72e-09	4.31e-07	1
LYNX1_AP_85360	LYNX1	ENSG00000180155	chr8 | -	AP	NA	NA	3	BLCA	neoplasm_histologic_grade	"Low Grade" vs "High Grade"	0.2096	2.16e-06	2.57e-05	0.8729
LYNX1_AP_85361	LYNX1	ENSG00000180155	chr8 | -	AP	NA	NA	7	BLCA	neoplasm_histologic_grade	"Low Grade" vs "High Grade"	-0.3702	0.000208	0.000655	0.8729
LYNX1_AP_85363	LYNX1	ENSG00000180155	chr8 | -	AP	NA	NA	1	BLCA	neoplasm_histologic_grade	"Low Grade" vs "High Grade"	0.1862	0.025	0.028	0.8729
LYNX1_AT_85365	LYNX1	ENSG00000180155	chr8 | -	AT	NA	NA	6.2	BLCA	neoplasm_histologic_grade	"Low Grade" vs "High Grade"	0.2202	0.000159	0.000533	1
LYNX1_AT_85366	LYNX1	ENSG00000180155	chr8 | -	AT	NA	NA	9.2	BLCA	neoplasm_histologic_grade	"Low Grade" vs "High Grade"	-0.2202	0.000159	0.000533	1
LYPD6B_AP_55543	LYPD6B	ENSG00000150556	chr2 | +	AP	NA	NA	2	BLCA	neoplasm_histologic_grade	"Low Grade" vs "High Grade"	-0.2416	0.00053	0.0013	0.8729
LYPD6B_AP_55546	LYPD6B	ENSG00000150556	chr2 | +	AP	NA	NA	1	BLCA	neoplasm_histologic_grade	"Low Grade" vs "High Grade"	0.236	0.000801	0.00177	0.8729
LYRM9_RI_39867	LYRM9	ENSG00000232859	chr17 | -	RI	6.1	6.5	6.2:6.3:6.4	BLCA	neoplasm_histologic_grade	"Low Grade" vs "High Grade"	0.1321	0.000102	0.000387	0.8824
MAFK_AP_78580	MAFK	ENSG00000198517	chr7 | +	AP	NA	NA	1	BLCA	neoplasm_histologic_grade	"Low Grade" vs "High Grade"	-0.1515	0.000634	0.00148	0.9953
MAFK_AP_78581	MAFK	ENSG00000198517	chr7 | +	AP	NA	NA	2	BLCA	neoplasm_histologic_grade	"Low Grade" vs "High Grade"	0.1515	0.000634	0.00148	0.9953
MAGED2_AP_89246	MAGED2	ENSG00000102316	chrX | +	AP	NA	NA	3	BLCA	neoplasm_histologic_grade	"Low Grade" vs "High Grade"	-0.1328	2.21e-06	2.61e-05	0.9953
MAN1C1_AP_1192	MAN1C1	ENSG00000117643	chr1 | +	AP	NA	NA	4	BLCA	neoplasm_histologic_grade	"Low Grade" vs "High Grade"	0.1291	0.017	0.021	1
MAN1C1_AP_1193	MAN1C1	ENSG00000117643	chr1 | +	AP	NA	NA	1	BLCA	neoplasm_histologic_grade	"Low Grade" vs "High Grade"	-0.1291	0.017	0.021	1
MANBAL_ES_59340	MANBAL	ENSG00000101363	chr20 | +	ES	1	3	2.2	BLCA	neoplasm_histologic_grade	"Low Grade" vs "High Grade"	-0.137	0.036	0.04	0.9835
MANBAL_ES_59343	MANBAL	ENSG00000101363	chr20 | +	ES	1	4.2	2.2:3	BLCA	neoplasm_histologic_grade	"Low Grade" vs "High Grade"	-0.1366	0.000262	0.000781	0.9953
MAP3K7_ES_77020	MAP3K7	ENSG00000135341	chr6 | -	ES	10	12	11	BLCA	neoplasm_histologic_grade	"Low Grade" vs "High Grade"	0.1394	0.000309	0.000868	0.9835
MAP3K8_AP_11120	MAP3K8	ENSG00000107968	chr10 | +	AP	NA	NA	1	BLCA	neoplasm_histologic_grade	"Low Grade" vs "High Grade"	-0.1235	0.027	0.031	0.9741
MAP3K8_AP_11121	MAP3K8	ENSG00000107968	chr10 | +	AP	NA	NA	3.1	BLCA	neoplasm_histologic_grade	"Low Grade" vs "High Grade"	0.1235	0.027	0.031	0.9741
MAP7D1_AP_1756	MAP7D1	ENSG00000116871	chr1 | +	AP	NA	NA	9	BLCA	neoplasm_histologic_grade	"Low Grade" vs "High Grade"	0.1263	0.00118	0.00231	0.9953
MAP7D1_AP_1757	MAP7D1	ENSG00000116871	chr1 | +	AP	NA	NA	1	BLCA	neoplasm_histologic_grade	"Low Grade" vs "High Grade"	-0.1263	0.00118	0.00231	0.9953
MAP7D3_AT_90197	MAP7D3	ENSG00000129680	chrX | -	AT	NA	NA	21	BLCA	neoplasm_histologic_grade	"Low Grade" vs "High Grade"	0.1427	0.000567	0.00136	1
MAP7D3_AT_90198	MAP7D3	ENSG00000129680	chrX | -	AT	NA	NA	20	BLCA	neoplasm_histologic_grade	"Low Grade" vs "High Grade"	-0.1427	0.000567	0.00136	1
MAPK1_AT_61256	MAPK1	ENSG00000100030	chr22 | -	AT	NA	NA	9	BLCA	neoplasm_histologic_grade	"Low Grade" vs "High Grade"	-0.1168	0.022	0.026	1
MAPK1_AT_61257	MAPK1	ENSG00000100030	chr22 | -	AT	NA	NA	8.2	BLCA	neoplasm_histologic_grade	"Low Grade" vs "High Grade"	0.1168	0.022	0.026	1
MAPK10_ME_69825	MAPK10	ENSG00000109339	chr4 | -	ME	11	14	12|13	BLCA	neoplasm_histologic_grade	"Low Grade" vs "High Grade"	-0.1116	0.00176	0.00314	0.8471
MARCH2_AP_47229	2023-03-02	ENSG00000099785	chr19 | +	AP	NA	NA	2.1	BLCA	neoplasm_histologic_grade	"Low Grade" vs "High Grade"	0.1387	0.032	0.036	0.9694
MARCH2_AP_47230	2023-03-02	ENSG00000099785	chr19 | +	AP	NA	NA	1	BLCA	neoplasm_histologic_grade	"Low Grade" vs "High Grade"	-0.1387	0.032	0.036	0.9694
MARCH6_AP_71560	2023-03-06	ENSG00000145495	chr5 | +	AP	NA	NA	12.1	BLCA	neoplasm_histologic_grade	"Low Grade" vs "High Grade"	0.2552	0.00128	0.00246	0.9906
MARCH6_AP_71561	2023-03-06	ENSG00000145495	chr5 | +	AP	NA	NA	1	BLCA	neoplasm_histologic_grade	"Low Grade" vs "High Grade"	-0.2552	0.00128	0.00246	0.9906
MARK3_ES_29447	MARK3	ENSG00000075413	chr14 | +	ES	16	18	17	BLCA	neoplasm_histologic_grade	"Low Grade" vs "High Grade"	-0.1218	0.00727	0.00997	0.9576
MAST1_AT_47878	MAST1	ENSG00000105613	chr19 | +	AT	NA	NA	14.2	BLCA	neoplasm_histologic_grade	"Low Grade" vs "High Grade"	-0.2247	0.00208	0.00358	0.8988
MAST1_AT_47879	MAST1	ENSG00000105613	chr19 | +	AT	NA	NA	28	BLCA	neoplasm_histologic_grade	"Low Grade" vs "High Grade"	0.2247	0.00208	0.00358	0.8988
MAST4_AP_72279	MAST4	ENSG00000069020	chr5 | +	AP	NA	NA	4	BLCA	neoplasm_histologic_grade	"Low Grade" vs "High Grade"	-0.104	0.013	0.016	0.9929
MAX_ES_28008	MAX	ENSG00000125952	chr14 | -	ES	1.2	3	2	BLCA	neoplasm_histologic_grade	"Low Grade" vs "High Grade"	-0.1227	3.49e-05	0.000179	0.9953
MAX_RI_27935	MAX	ENSG00000125952	chr14 | -	RI	5.5	5.8	5.6:5.7	BLCA	neoplasm_histologic_grade	"Low Grade" vs "High Grade"	0.1163	0.00356	0.00555	0.9929
MCC_AP_73004	MCC	ENSG00000171444	chr5 | -	AP	NA	NA	1	BLCA	neoplasm_histologic_grade	"Low Grade" vs "High Grade"	0.2509	3.26e-05	0.000169	0.8776
MCC_AP_73005	MCC	ENSG00000171444	chr5 | -	AP	NA	NA	4	BLCA	neoplasm_histologic_grade	"Low Grade" vs "High Grade"	-0.2509	4.26e-05	0.000206	0.8776
MCM7_AP_80880	MCM7	ENSG00000166508	chr7 | -	AP	NA	NA	2	BLCA	neoplasm_histologic_grade	"Low Grade" vs "High Grade"	0.2917	5.39e-07	1.13e-05	0.9953
MCM7_AP_80881	MCM7	ENSG00000166508	chr7 | -	AP	NA	NA	1	BLCA	neoplasm_histologic_grade	"Low Grade" vs "High Grade"	-0.2917	5.39e-07	1.13e-05	0.9953
MCM7_RI_80883	MCM7	ENSG00000166508	chr7 | -	RI	5.1	5.3	5.2	BLCA	neoplasm_histologic_grade	"Low Grade" vs "High Grade"	0.2705	6.27e-06	5.43e-05	0.9953
MCM8_ME_58660	MCM8	ENSG00000125885	chr20 | +	ME	10.2	13	11|12	BLCA	neoplasm_histologic_grade	"Low Grade" vs "High Grade"	-0.4462	1.33e-05	8.93e-05	0.9765
MDM1_RI_22927	MDM1	ENSG00000111554	chr12 | -	RI	3.2	3.4	3.3	BLCA	neoplasm_histologic_grade	"Low Grade" vs "High Grade"	0.159	0.028	0.032	0.9953
ME3_ES_18199	ME3	ENSG00000151376	chr11 | -	ES	8	11	10	BLCA	neoplasm_histologic_grade	"Low Grade" vs "High Grade"	0.1735	0.00754	0.01	0.96
MECOM_AP_67567	MECOM	ENSG00000085276	chr3 | -	AP	NA	NA	3	BLCA	neoplasm_histologic_grade	"Low Grade" vs "High Grade"	-0.1592	0.019	0.023	0.9624
MECOM_AP_67570	MECOM	ENSG00000085276	chr3 | -	AP	NA	NA	1	BLCA	neoplasm_histologic_grade	"Low Grade" vs "High Grade"	0.2107	0.000132	0.000474	0.9624
MED24_AP_40828	MED24	ENSG00000008838	chr17 | -	AP	NA	NA	2.1	BLCA	neoplasm_histologic_grade	"Low Grade" vs "High Grade"	0.1563	0.000541	0.00132	1
MED24_AP_40830	MED24	ENSG00000008838	chr17 | -	AP	NA	NA	1	BLCA	neoplasm_histologic_grade	"Low Grade" vs "High Grade"	-0.1563	0.000541	0.00132	1
MEIS1_RI_53810	MEIS1	ENSG00000143995	chr2 | +	RI	12.3	12.5	12.4	BLCA	neoplasm_histologic_grade	"Low Grade" vs "High Grade"	0.286	0.015	0.019	0.9718
MEIS2_AP_29906	MEIS2	ENSG00000134138	chr15 | -	AP	NA	NA	2.1	BLCA	neoplasm_histologic_grade	"Low Grade" vs "High Grade"	-0.1244	1.41e-05	9.24e-05	0.9882
METTL17_AA_26479	METTL17	ENSG00000165792	chr14 | +	AA	3	4.2	4.1	BLCA	neoplasm_histologic_grade	"Low Grade" vs "High Grade"	0.1045	0.00103	0.00211	0.9953
METTL2B_ES_81696	METTL2B	ENSG00000165055	chr7 | +	ES	1	4	2	BLCA	neoplasm_histologic_grade	"Low Grade" vs "High Grade"	-0.1226	0.00106	0.00215	0.9929
METTL3_RI_26596	METTL3	ENSG00000165819	chr14 | -	RI	8.1	8.3	8.2	BLCA	neoplasm_histologic_grade	"Low Grade" vs "High Grade"	0.1069	0.00484	0.00708	1
MFF_ES_57813	MFF	ENSG00000168958	chr2 | +	ES	1	6	03:04:05	BLCA	neoplasm_histologic_grade	"Low Grade" vs "High Grade"	-0.1506	0.00267	0.00433	0.9859
MFI2_AT_68274	MFI2	ENSG00000163975	chr3 | -	AT	NA	NA	17	BLCA	neoplasm_histologic_grade	"Low Grade" vs "High Grade"	0.179	1.09e-05	7.72e-05	1
MFI2_AT_68275	MFI2	ENSG00000163975	chr3 | -	AT	NA	NA	7	BLCA	neoplasm_histologic_grade	"Low Grade" vs "High Grade"	-0.179	1.09e-05	7.72e-05	1
MFSD11_RI_43683	MFSD11	ENSG00000092931	chr17 | +	RI	2.4	2.6	2.5	BLCA	neoplasm_histologic_grade	"Low Grade" vs "High Grade"	0.1412	0.00235	0.00393	0.9976
MFSD11_RI_43686	MFSD11	ENSG00000092931	chr17 | +	RI	2.2	2.6	2.3:2.4:2.5	BLCA	neoplasm_histologic_grade	"Low Grade" vs "High Grade"	0.1038	0.039	0.044	0.9976
MGAT1_AP_75022	MGAT1	ENSG00000131446	chr5 | -	AP	NA	NA	5	BLCA	neoplasm_histologic_grade	"Low Grade" vs "High Grade"	0.1312	0.00783	0.011	1
MGAT4B_AP_74927	MGAT4B	ENSG00000161013	chr5 | -	AP	NA	NA	1	BLCA	neoplasm_histologic_grade	"Low Grade" vs "High Grade"	-0.113	0.000439	0.00112	0.9976
MGAT4B_AP_74928	MGAT4B	ENSG00000161013	chr5 | -	AP	NA	NA	2.1	BLCA	neoplasm_histologic_grade	"Low Grade" vs "High Grade"	0.113	0.000439	0.00112	0.9976
MGRN1_RI_33779	MGRN1	ENSG00000102858	chr16 | +	RI	17.1	17.3	17.2	BLCA	neoplasm_histologic_grade	"Low Grade" vs "High Grade"	0.1567	0.00814	0.011	1
MICAL2_AT_14418	MICAL2	ENSG00000133816	chr11 | +	AT	NA	NA	29	BLCA	neoplasm_histologic_grade	"Low Grade" vs "High Grade"	0.1201	0.024	0.028	1
MIPOL1_AT_27299	MIPOL1	ENSG00000151338	chr14 | +	AT	NA	NA	17	BLCA	neoplasm_histologic_grade	"Low Grade" vs "High Grade"	-0.1048	0.01	0.013	1
MIS18BP1_ES_27410	MIS18BP1	ENSG00000129534	chr14 | -	ES	7	9	8	BLCA	neoplasm_histologic_grade	"Low Grade" vs "High Grade"	0.337	1.54e-06	1.93e-05	0.9035
MLLT10_AT_10970	MLLT10	ENSG00000078403	chr10 | +	AT	NA	NA	26	BLCA	neoplasm_histologic_grade	"Low Grade" vs "High Grade"	0.1029	0.000154	0.000526	1
MLLT10_AT_10971	MLLT10	ENSG00000078403	chr10 | +	AT	NA	NA	5	BLCA	neoplasm_histologic_grade	"Low Grade" vs "High Grade"	-0.1029	0.000154	0.000526	1
MLST8_AP_33211	MLST8	ENSG00000167965	chr16 | +	AP	NA	NA	2	BLCA	neoplasm_histologic_grade	"Low Grade" vs "High Grade"	-0.1624	2.81e-06	3.06e-05	0.9906
MLST8_AP_33212	MLST8	ENSG00000167965	chr16 | +	AP	NA	NA	1	BLCA	neoplasm_histologic_grade	"Low Grade" vs "High Grade"	0.1624	2.81e-06	3.06e-05	0.9906
MLXIP_AP_24922	MLXIP	ENSG00000175727	chr12 | +	AP	NA	NA	9.1	BLCA	neoplasm_histologic_grade	"Low Grade" vs "High Grade"	0.1226	0.00713	0.00983	0.9882
MLXIP_AP_24923	MLXIP	ENSG00000175727	chr12 | +	AP	NA	NA	1	BLCA	neoplasm_histologic_grade	"Low Grade" vs "High Grade"	-0.1226	0.00713	0.00983	0.9882
MOK_RI_29377	MOK	ENSG00000080823	chr14 | -	RI	15.1	15.6	15.2:15.3:15.4:15.5	BLCA	neoplasm_histologic_grade	"Low Grade" vs "High Grade"	0.1118	0.039	0.043	0.9694
MORN1_AT_252	MORN1	ENSG00000116151	chr1 | -	AT	NA	NA	8	BLCA	neoplasm_histologic_grade	"Low Grade" vs "High Grade"	-0.2082	0.00362	0.00562	0.9694
MORN1_AT_253	MORN1	ENSG00000116151	chr1 | -	AT	NA	NA	17	BLCA	neoplasm_histologic_grade	"Low Grade" vs "High Grade"	0.2401	0.00394	0.00601	0.9694
MORN4_AT_12730	MORN4	ENSG00000171160	chr10 | -	AT	NA	NA	2.2	BLCA	neoplasm_histologic_grade	"Low Grade" vs "High Grade"	0.1119	0.00655	0.00912	1
MORN4_AT_12731	MORN4	ENSG00000171160	chr10 | -	AT	NA	NA	5	BLCA	neoplasm_histologic_grade	"Low Grade" vs "High Grade"	-0.1119	0.00655	0.00912	1
MROH1_AT_85542	MROH1	ENSG00000179832	chr8 | +	AT	NA	NA	14	BLCA	neoplasm_histologic_grade	"Low Grade" vs "High Grade"	-0.118	1.93e-07	5.52e-06	1
MROH1_AT_85543	MROH1	ENSG00000179832	chr8 | +	AT	NA	NA	45	BLCA	neoplasm_histologic_grade	"Low Grade" vs "High Grade"	0.118	1.93e-07	5.52e-06	1
MROH6_AP_85423	MROH6	ENSG00000204839	chr8 | -	AP	NA	NA	1	BLCA	neoplasm_histologic_grade	"Low Grade" vs "High Grade"	-0.1094	0.00643	0.00898	0.9765
MROH6_AP_85424	MROH6	ENSG00000204839	chr8 | -	AP	NA	NA	9.1	BLCA	neoplasm_histologic_grade	"Low Grade" vs "High Grade"	0.1094	0.00643	0.00898	0.9765
MRPL36_AD_71493	MRPL36	ENSG00000171421	chr5 | -	AD	2.1	3	2.2:2.3	BLCA	neoplasm_histologic_grade	"Low Grade" vs "High Grade"	0.1244	0.015	0.019	0.9859
MRPL43_AD_12856	MRPL43	ENSG00000055950	chr10 | -	AD	3.1	3.4	3.2	BLCA	neoplasm_histologic_grade	"Low Grade" vs "High Grade"	-0.305	0.00143	0.00268	0.9976
MRPL43_AT_12849	MRPL43	ENSG00000055950	chr10 | -	AT	NA	NA	6	BLCA	neoplasm_histologic_grade	"Low Grade" vs "High Grade"	0.1452	0.000327	0.000901	1
MRPL43_AT_12851	MRPL43	ENSG00000055950	chr10 | -	AT	NA	NA	3.4	BLCA	neoplasm_histologic_grade	"Low Grade" vs "High Grade"	-0.1497	0.000422	0.00109	1
MRPL45_ES_40572	MRPL45	ENSG00000174100	chr17 | +	ES	3	5	4	BLCA	neoplasm_histologic_grade	"Low Grade" vs "High Grade"	0.1134	0.00112	0.00224	1
MRPL52_ES_26638	MRPL52	ENSG00000172590	chr14 | +	ES	2	5	00:03:04.100000	BLCA	neoplasm_histologic_grade	"Low Grade" vs "High Grade"	-0.1142	0.0039	0.00596	0.9953
MRPL55_AA_10106	MRPL55	ENSG00000162910	chr1 | -	AA	1.2	2.9	2.2:2.3:2.4:2.5:2.6:2.7:2.8	BLCA	neoplasm_histologic_grade	"Low Grade" vs "High Grade"	0.2749	4.65e-05	0.000219	0.9976
MRPL55_AA_10129	MRPL55	ENSG00000162910	chr1 | -	AA	1.1	2.9	2.2:2.3:2.4:2.5:2.6:2.7:2.8	BLCA	neoplasm_histologic_grade	"Low Grade" vs "High Grade"	0.2943	8.1e-06	6.54e-05	0.9553
MRPL55_ES_10111	MRPL55	ENSG00000162910	chr1 | -	ES	1.2	2.9	2.2:2.3:2.4:2.5:2.6:2.8	BLCA	neoplasm_histologic_grade	"Low Grade" vs "High Grade"	0.155	0.000119	0.000434	0.9929
MRPL55_ES_10116	MRPL55	ENSG00000162910	chr1 | -	ES	1.2	2.9	2.2:2.8	BLCA	neoplasm_histologic_grade	"Low Grade" vs "High Grade"	0.1656	0.02	0.023	0.9906
MRPL55_ES_10117	MRPL55	ENSG00000162910	chr1 | -	ES	1.2	2.9	2.2:2.3:2.4:2.5:2.6	BLCA	neoplasm_histologic_grade	"Low Grade" vs "High Grade"	0.1205	0.0022	0.00375	1
MRPL55_ES_10128	MRPL55	ENSG00000162910	chr1 | -	ES	1.1	2.9	1.2:2.2:2.3:2.4:2.5:2.6:2.7:2.8	BLCA	neoplasm_histologic_grade	"Low Grade" vs "High Grade"	0.3417	0.000173	0.000567	0.9859
MRPL55_ES_10137	MRPL55	ENSG00000162910	chr1 | -	ES	1.1	2.9	1.2:2.2:2.3:2.4:2.5:2.6:2.8	BLCA	neoplasm_histologic_grade	"Low Grade" vs "High Grade"	0.2192	0.000375	0.00101	0.9812
MRPL55_ES_10138	MRPL55	ENSG00000162910	chr1 | -	ES	1.1	2.9	2.2:2.3:2.4:2.5:2.6:2.8	BLCA	neoplasm_histologic_grade	"Low Grade" vs "High Grade"	0.1538	1.72e-05	0.00011	0.9106
MRPL55_ES_10146	MRPL55	ENSG00000162910	chr1 | -	ES	1.1	2.9	1.2:2.2:2.8	BLCA	neoplasm_histologic_grade	"Low Grade" vs "High Grade"	0.1428	0.021	0.025	0.9859
MRPL55_ES_10148	MRPL55	ENSG00000162910	chr1 | -	ES	1.1	2.9	1.2:2.2:2.3:2.4:2.5:2.6	BLCA	neoplasm_histologic_grade	"Low Grade" vs "High Grade"	0.1225	0.00744	0.01	1
MRPL55_ES_10149	MRPL55	ENSG00000162910	chr1 | -	ES	1.1	2.9	2.2:2.3:2.4:2.5:2.6	BLCA	neoplasm_histologic_grade	"Low Grade" vs "High Grade"	0.1531	0.00092	0.00196	1
MRPL55_RI_10073	MRPL55	ENSG00000162910	chr1 | -	RI	2.6	2.9	2.7:2.8	BLCA	neoplasm_histologic_grade	"Low Grade" vs "High Grade"	0.1399	0.00149	0.00277	0.9976
MRPL55_RI_10075	MRPL55	ENSG00000162910	chr1 | -	RI	2.5	2.9	2.6:2.7:2.8	BLCA	neoplasm_histologic_grade	"Low Grade" vs "High Grade"	0.1135	0.00414	0.00624	0.9482
MRPL55_RI_10081	MRPL55	ENSG00000162910	chr1 | -	RI	2.2	2.8	2.3:2.4:2.5:2.6:2.7	BLCA	neoplasm_histologic_grade	"Low Grade" vs "High Grade"	0.1109	0.00611	0.00864	0.9906
MRRF_AP_87462	MRRF	ENSG00000148187	chr9 | +	AP	NA	NA	1	BLCA	neoplasm_histologic_grade	"Low Grade" vs "High Grade"	-0.106	0.018	0.022	0.9882
MRRF_AP_87463	MRRF	ENSG00000148187	chr9 | +	AP	NA	NA	2.1	BLCA	neoplasm_histologic_grade	"Low Grade" vs "High Grade"	0.106	0.018	0.022	0.9882
MTA1_ES_29647	MTA1	ENSG00000182979	chr14 | +	ES	3	5	4	BLCA	neoplasm_histologic_grade	"Low Grade" vs "High Grade"	0.1145	0.000517	0.00127	0.9929
MTA3_ES_53371	MTA3	ENSG00000057935	chr2 | +	ES	6	8	7	BLCA	neoplasm_histologic_grade	"Low Grade" vs "High Grade"	0.1868	0.000727	0.00164	1
MTCP1_AP_90670	MTCP1	ENSG00000214827	chrX | -	AP	NA	NA	1	BLCA	neoplasm_histologic_grade	"Low Grade" vs "High Grade"	0.363	0.000279	0.00081	0.92
MTCP1_AP_90671	MTCP1	ENSG00000214827	chrX | -	AP	NA	NA	2	BLCA	neoplasm_histologic_grade	"Low Grade" vs "High Grade"	-0.363	0.000279	0.00081	0.92
MTERFD1_AP_84617	MTERFD1	ENSG00000156469	chr8 | -	AP	NA	NA	3.1	BLCA	neoplasm_histologic_grade	"Low Grade" vs "High Grade"	0.1498	1.28e-06	1.69e-05	0.9906
MTERFD1_AP_84619	MTERFD1	ENSG00000156469	chr8 | -	AP	NA	NA	1	BLCA	neoplasm_histologic_grade	"Low Grade" vs "High Grade"	-0.1498	1.28e-06	1.69e-05	0.9906
MTERFD3_RI_24188	MTERFD3	ENSG00000120832	chr12 | -	RI	1.1	1.3	1.2	BLCA	neoplasm_histologic_grade	"Low Grade" vs "High Grade"	0.179	0.00138	0.0026	0.9929
MTFP1_ES_61749	MTFP1	ENSG00000242114	chr22 | +	ES	2	4	3.1:3.2:3.3	BLCA	neoplasm_histologic_grade	"Low Grade" vs "High Grade"	0.1033	0.017	0.021	0.9012
MTFR1L_AA_1212	MTFR1L	ENSG00000117640	chr1 | +	AA	4.2	7.2	7.1	BLCA	neoplasm_histologic_grade	"Low Grade" vs "High Grade"	0.1569	1.7e-05	0.00011	0.9788
MTFR1L_ES_1213	MTFR1L	ENSG00000117640	chr1 | +	ES	4.2	7.2	6	BLCA	neoplasm_histologic_grade	"Low Grade" vs "High Grade"	0.1342	0.00178	0.00317	0.9765
MTIF2_ES_53607	MTIF2	ENSG00000085760	chr2 | -	ES	3	5	4	BLCA	neoplasm_histologic_grade	"Low Grade" vs "High Grade"	0.1932	0.000112	0.000422	1
MTSS1_AP_85105	MTSS1	ENSG00000170873	chr8 | -	AP	NA	NA	1	BLCA	neoplasm_histologic_grade	"Low Grade" vs "High Grade"	-0.1356	0.00789	0.011	0.9929
MTSS1_AP_85106	MTSS1	ENSG00000170873	chr8 | -	AP	NA	NA	8.1	BLCA	neoplasm_histologic_grade	"Low Grade" vs "High Grade"	0.1356	0.00789	0.011	0.9929
MXRA7_AP_43608	MXRA7	ENSG00000182534	chr17 | -	AP	NA	NA	1	BLCA	neoplasm_histologic_grade	"Low Grade" vs "High Grade"	-0.1441	0.000459	0.00115	1
MXRA7_AP_43610	MXRA7	ENSG00000182534	chr17 | -	AP	NA	NA	3.1	BLCA	neoplasm_histologic_grade	"Low Grade" vs "High Grade"	0.15	0.000488	0.00121	1
MXRA8_AP_142	MXRA8	ENSG00000162576	chr1 | -	AP	NA	NA	1	BLCA	neoplasm_histologic_grade	"Low Grade" vs "High Grade"	0.4214	1.5e-07	4.68e-06	0.9882
MXRA8_AP_143	MXRA8	ENSG00000162576	chr1 | -	AP	NA	NA	2	BLCA	neoplasm_histologic_grade	"Low Grade" vs "High Grade"	-0.4214	1.5e-07	4.68e-06	0.9882
MYB_ES_77818	MYB	ENSG00000118513	chr6 | +	ES	16	19.1	17	BLCA	neoplasm_histologic_grade	"Low Grade" vs "High Grade"	0.1792	0.000705	0.0016	0.9859
MYEF2_AT_30479	MYEF2	ENSG00000104177	chr15 | -	AT	NA	NA	6	BLCA	neoplasm_histologic_grade	"Low Grade" vs "High Grade"	-0.12	0.000692	0.00158	1
MYEF2_AT_30481	MYEF2	ENSG00000104177	chr15 | -	AT	NA	NA	18	BLCA	neoplasm_histologic_grade	"Low Grade" vs "High Grade"	0.1506	0.000147	0.000509	1
MYL5_AP_68380	MYL5	ENSG00000215375	chr4 | +	AP	NA	NA	1.1	BLCA	neoplasm_histologic_grade	"Low Grade" vs "High Grade"	-0.1887	0.00274	0.00442	1
MYL5_AP_68382	MYL5	ENSG00000215375	chr4 | +	AP	NA	NA	3	BLCA	neoplasm_histologic_grade	"Low Grade" vs "High Grade"	0.1887	0.00274	0.00442	1
MYL6_ES_22384	MYL6	ENSG00000092841	chr12 | +	ES	1.4	3.1	2.1	BLCA	neoplasm_histologic_grade	"Low Grade" vs "High Grade"	0.1204	0.012	0.015	0.9953
MYO19_AA_40482	MYO19	ENSG00000141140	chr17 | -	AA	20	21.2	21.1	BLCA	neoplasm_histologic_grade	"Low Grade" vs "High Grade"	0.1464	0.000157	0.000532	1
MYO19_ES_40489	MYO19	ENSG00000141140	chr17 | -	ES	11.1	13	11.2:12	BLCA	neoplasm_histologic_grade	"Low Grade" vs "High Grade"	0.1485	0.00682	0.00945	1
MYO1C_AP_38309	MYO1C	ENSG00000197879	chr17 | -	AP	NA	NA	2	BLCA	neoplasm_histologic_grade	"Low Grade" vs "High Grade"	-0.1131	0.00562	0.00804	0.9647
MZF1_AP_52484	MZF1	ENSG00000099326	chr19 | -	AP	NA	NA	1.1	BLCA	neoplasm_histologic_grade	"Low Grade" vs "High Grade"	-0.1658	0.000479	0.00119	0.9835
MZF1_AP_52485	MZF1	ENSG00000099326	chr19 | -	AP	NA	NA	2	BLCA	neoplasm_histologic_grade	"Low Grade" vs "High Grade"	0.1662	0.000411	0.00107	0.9835
NAA25_ES_24574	NAA25	ENSG00000111300	chr12 | -	ES	1	3	2	BLCA	neoplasm_histologic_grade	"Low Grade" vs "High Grade"	0.1997	0.000587	0.0014	0.9859
NADSYN1_AP_17422	NADSYN1	ENSG00000172890	chr11 | +	AP	NA	NA	1	BLCA	neoplasm_histologic_grade	"Low Grade" vs "High Grade"	-0.1903	8.82e-06	6.93e-05	1
NADSYN1_AP_17423	NADSYN1	ENSG00000172890	chr11 | +	AP	NA	NA	12	BLCA	neoplasm_histologic_grade	"Low Grade" vs "High Grade"	0.1903	8.82e-06	6.93e-05	1
NASP_ES_2754	NASP	ENSG00000132780	chr1 | +	ES	1	3	2	BLCA	neoplasm_histologic_grade	"Low Grade" vs "High Grade"	0.1782	8.77e-05	0.00034	1
NAT6_AA_64991	NAT6	ENSG00000243477	chr3 | -	AA	1	3.2	3.1	BLCA	neoplasm_histologic_grade	"Low Grade" vs "High Grade"	0.1116	0.029	0.033	0.9765
NAT9_RI_43298	NAT9	ENSG00000109065	chr17 | -	RI	6.2	6.5	6.3:6.4	BLCA	neoplasm_histologic_grade	"Low Grade" vs "High Grade"	0.1145	0.0027	0.00437	0.9953
NCOA6_AP_59034	NCOA6	ENSG00000198646	chr20 | -	AP	NA	NA	1	BLCA	neoplasm_histologic_grade	"Low Grade" vs "High Grade"	-0.1698	0.00105	0.00213	1
NCOA6_AP_59035	NCOA6	ENSG00000198646	chr20 | -	AP	NA	NA	2	BLCA	neoplasm_histologic_grade	"Low Grade" vs "High Grade"	0.1698	0.00105	0.00213	1
NCOR2_ES_25145	NCOR2	ENSG00000196498	chr12 | -	ES	45	47	46.1	BLCA	neoplasm_histologic_grade	"Low Grade" vs "High Grade"	-0.1238	0.000267	0.000787	0.9812
NDE1_AT_34184	NDE1	ENSG00000072864	chr16 | +	AT	NA	NA	12	BLCA	neoplasm_histologic_grade	"Low Grade" vs "High Grade"	-0.1016	0.00493	0.00718	1
NDE1_AT_34185	NDE1	ENSG00000072864	chr16 | +	AT	NA	NA	13	BLCA	neoplasm_histologic_grade	"Low Grade" vs "High Grade"	0.1016	0.00493	0.00718	1
NDUFA7_AT_47217	NDUFA7	ENSG00000167774	chr19 | -	AT	NA	NA	5.2	BLCA	neoplasm_histologic_grade	"Low Grade" vs "High Grade"	0.1047	0.000924	0.00196	1
NDUFS5_AD_1869	NDUFS5	ENSG00000168653	chr1 | +	AD	1.1	2	1.2	BLCA	neoplasm_histologic_grade	"Low Grade" vs "High Grade"	-0.2541	0.024	0.028	1
NEIL3_AT_71226	NEIL3	ENSG00000109674	chr4 | +	AT	NA	NA	8.2	BLCA	neoplasm_histologic_grade	"Low Grade" vs "High Grade"	0.2944	2.5e-05	0.00014	0.9906
NEIL3_AT_71227	NEIL3	ENSG00000109674	chr4 | +	AT	NA	NA	10	BLCA	neoplasm_histologic_grade	"Low Grade" vs "High Grade"	-0.2944	2.5e-05	0.00014	0.9906
NEK2_AT_9717	NEK2	ENSG00000117650	chr1 | -	AT	NA	NA	8	BLCA	neoplasm_histologic_grade	"Low Grade" vs "High Grade"	-0.1591	3.87e-05	0.000191	1
NEK2_AT_9718	NEK2	ENSG00000117650	chr1 | -	AT	NA	NA	7.2	BLCA	neoplasm_histologic_grade	"Low Grade" vs "High Grade"	0.1591	3.87e-05	0.000191	1
NFATC2IP_AP_35900	NFATC2IP	ENSG00000176953	chr16 | +	AP	NA	NA	2	BLCA	neoplasm_histologic_grade	"Low Grade" vs "High Grade"	-0.1439	0.011	0.015	0.9976
NFATC2IP_AP_35902	NFATC2IP	ENSG00000176953	chr16 | +	AP	NA	NA	7.1	BLCA	neoplasm_histologic_grade	"Low Grade" vs "High Grade"	0.1504	0.00931	0.012	0.9976
NFS1_ES_59219	NFS1	ENSG00000244005	chr20 | -	ES	5	8	7	BLCA	neoplasm_histologic_grade	"Low Grade" vs "High Grade"	0.1343	0.00407	0.00616	1
NFX1_AT_86100	NFX1	ENSG00000086102	chr9 | +	AT	NA	NA	16	BLCA	neoplasm_histologic_grade	"Low Grade" vs "High Grade"	-0.1048	8.15e-07	1.37e-05	1
NFX1_AT_86101	NFX1	ENSG00000086102	chr9 | +	AT	NA	NA	25	BLCA	neoplasm_histologic_grade	"Low Grade" vs "High Grade"	0.1002	4.12e-07	9.67e-06	1
NGLY1_AP_63751	NGLY1	ENSG00000151092	chr3 | -	AP	NA	NA	1	BLCA	neoplasm_histologic_grade	"Low Grade" vs "High Grade"	0.2218	5.12e-05	0.000232	0.9859
NGLY1_AP_63753	NGLY1	ENSG00000151092	chr3 | -	AP	NA	NA	2	BLCA	neoplasm_histologic_grade	"Low Grade" vs "High Grade"	-0.2218	5.12e-05	0.000232	0.9859
NIN_ES_27495	NIN	ENSG00000100503	chr14 | -	ES	17	19	18	BLCA	neoplasm_histologic_grade	"Low Grade" vs "High Grade"	-0.1126	0.024	0.028	0.9859
NIPA1_AP_29687	NIPA1	ENSG00000170113	chr15 | -	AP	NA	NA	3	BLCA	neoplasm_histologic_grade	"Low Grade" vs "High Grade"	-0.1592	0.000342	0.000936	1
NIPA1_AP_29688	NIPA1	ENSG00000170113	chr15 | -	AP	NA	NA	2	BLCA	neoplasm_histologic_grade	"Low Grade" vs "High Grade"	0.1333	0.000455	0.00114	1
NKIRAS2_ES_40982	NKIRAS2	ENSG00000168256	chr17 | +	ES	5.3	7	5.4:5.5:5.6:6	BLCA	neoplasm_histologic_grade	"Low Grade" vs "High Grade"	0.1974	0.00127	0.00246	0.9365
NKIRAS2_ES_40983	NKIRAS2	ENSG00000168256	chr17 | +	ES	5.3	7	5.5:5.6:6	BLCA	neoplasm_histologic_grade	"Low Grade" vs "High Grade"	0.2067	0.00152	0.00282	0.8941
NKIRAS2_ES_40984	NKIRAS2	ENSG00000168256	chr17 | +	ES	5.3	7	5.6:6	BLCA	neoplasm_histologic_grade	"Low Grade" vs "High Grade"	0.205	0.00171	0.00309	0.8894
NMRK1_ES_86630	NMRK1	ENSG00000106733	chr9 | -	ES	2	4	3	BLCA	neoplasm_histologic_grade	"Low Grade" vs "High Grade"	0.11	0.00157	0.00288	0.9976
NNT_AP_71963	NNT	ENSG00000112992	chr5 | +	AP	NA	NA	1	BLCA	neoplasm_histologic_grade	"Low Grade" vs "High Grade"	0.1735	0.013	0.017	0.9082
NNT_AP_71964	NNT	ENSG00000112992	chr5 | +	AP	NA	NA	2	BLCA	neoplasm_histologic_grade	"Low Grade" vs "High Grade"	-0.1735	0.013	0.017	0.9082
NOL6_AP_86114	NOL6	ENSG00000165271	chr9 | -	AP	NA	NA	1	BLCA	neoplasm_histologic_grade	"Low Grade" vs "High Grade"	-0.1845	0.000355	0.000965	0.9624
NOL6_AP_86115	NOL6	ENSG00000165271	chr9 | -	AP	NA	NA	21.1	BLCA	neoplasm_histologic_grade	"Low Grade" vs "High Grade"	0.1845	0.000355	0.000965	0.9624
NOP2_ES_19890	NOP2	ENSG00000111641	chr12 | -	ES	4.5	6	5	BLCA	neoplasm_histologic_grade	"Low Grade" vs "High Grade"	0.1204	0.00122	0.00236	1
NOP2_RI_19891	NOP2	ENSG00000111641	chr12 | -	RI	4.2	4.5	4.3:4.4	BLCA	neoplasm_histologic_grade	"Low Grade" vs "High Grade"	0.2572	2.83e-05	0.000152	0.9506
NOP2_RI_19893	NOP2	ENSG00000111641	chr12 | -	RI	4.2	4.4	4.3	BLCA	neoplasm_histologic_grade	"Low Grade" vs "High Grade"	0.1196	0.000385	0.00102	0.9788
NPEPPS_AD_42080	NPEPPS	ENSG00000141279	chr17 | +	AD	9.1	10	9.2	BLCA	neoplasm_histologic_grade	"Low Grade" vs "High Grade"	0.1814	0.000151	0.000521	0.9859
NPEPPS_AD_42082	NPEPPS	ENSG00000141279	chr17 | +	AD	7.1	8	7.2	BLCA	neoplasm_histologic_grade	"Low Grade" vs "High Grade"	-0.1006	4.54e-05	0.000215	0.9906
NPEPPS_AP_42074	NPEPPS	ENSG00000141279	chr17 | +	AP	NA	NA	11.1	BLCA	neoplasm_histologic_grade	"Low Grade" vs "High Grade"	0.1581	0.00189	0.00335	0.9812
NPEPPS_AP_42075	NPEPPS	ENSG00000141279	chr17 | +	AP	NA	NA	2.1	BLCA	neoplasm_histologic_grade	"Low Grade" vs "High Grade"	-0.1533	0.00241	0.00401	0.9812
NPIPA5_AP_34143	NPIPA5	ENSG00000183793	chr16 | -	AP	NA	NA	2	BLCA	neoplasm_histologic_grade	"Low Grade" vs "High Grade"	-0.1174	0.00203	0.00353	0.9788
NPIPA5_AP_34144	NPIPA5	ENSG00000183793	chr16 | -	AP	NA	NA	1	BLCA	neoplasm_histologic_grade	"Low Grade" vs "High Grade"	0.1174	0.00203	0.00353	0.9788
NPIPB3_AP_34444	NPIPB3	ENSG00000169246	chr16 | -	AP	NA	NA	8.1	BLCA	neoplasm_histologic_grade	"Low Grade" vs "High Grade"	0.161	0.00565	0.00807	1
NPIPB4_AP_34532	NPIPB4	ENSG00000185864	chr16 | -	AP	NA	NA	2.1	BLCA	neoplasm_histologic_grade	"Low Grade" vs "High Grade"	-0.1091	0.00999	0.013	0.9647
NPRL3_ES_32813	NPRL3	ENSG00000103148	chr16 | -	ES	2	4	3	BLCA	neoplasm_histologic_grade	"Low Grade" vs "High Grade"	0.1255	0.00648	0.00903	1
NR1H3_ES_15703	NR1H3	ENSG00000025434	chr11 | +	ES	3.5	5.2	4	BLCA	neoplasm_histologic_grade	"Low Grade" vs "High Grade"	0.1174	0.00104	0.00213	0.9459
NR1H3_RI_15705	NR1H3	ENSG00000025434	chr11 | +	RI	3.2	3.5	3.3:3.4	BLCA	neoplasm_histologic_grade	"Low Grade" vs "High Grade"	0.118	0.017	0.02	0.9624
NR4A1_AP_21884	NR4A1	ENSG00000123358	chr12 | +	AP	NA	NA	4.1	BLCA	neoplasm_histologic_grade	"Low Grade" vs "High Grade"	-0.2509	0.00279	0.00449	1
NR4A1_AP_21887	NR4A1	ENSG00000123358	chr12 | +	AP	NA	NA	2	BLCA	neoplasm_histologic_grade	"Low Grade" vs "High Grade"	0.2301	0.00223	0.00378	1
NR4A2_AP_55613	NR4A2	ENSG00000153234	chr2 | -	AP	NA	NA	1	BLCA	neoplasm_histologic_grade	"Low Grade" vs "High Grade"	0.2028	0.00182	0.00324	0.9976
NR4A2_AP_55614	NR4A2	ENSG00000153234	chr2 | -	AP	NA	NA	2	BLCA	neoplasm_histologic_grade	"Low Grade" vs "High Grade"	-0.1763	0.000612	0.00144	0.9976
NSMF_AP_88305	NSMF	ENSG00000165802	chr9 | -	AP	NA	NA	8	BLCA	neoplasm_histologic_grade	"Low Grade" vs "High Grade"	0.1074	0.00458	0.00677	0.9435
NSMF_AP_88307	NSMF	ENSG00000165802	chr9 | -	AP	NA	NA	1	BLCA	neoplasm_histologic_grade	"Low Grade" vs "High Grade"	-0.1674	0.0018	0.0032	0.9435
NT5C3B_ES_40954	NT5C3B	ENSG00000141698	chr17 | -	ES	2	4	3	BLCA	neoplasm_histologic_grade	"Low Grade" vs "High Grade"	0.1876	7.13e-06	5.99e-05	0.9859
NTMT1_AP_87861	NTMT1	ENSG00000148335	chr9 | +	AP	NA	NA	2	BLCA	neoplasm_histologic_grade	"Low Grade" vs "High Grade"	-0.2696	3.27e-05	0.00017	1
NTMT1_AP_87863	NTMT1	ENSG00000148335	chr9 | +	AP	NA	NA	1	BLCA	neoplasm_histologic_grade	"Low Grade" vs "High Grade"	0.2771	1.39e-05	9.17e-05	1
NTMT1_ES_87869	NTMT1	ENSG00000148335	chr9 | +	ES	2	5.1	4.1	BLCA	neoplasm_histologic_grade	"Low Grade" vs "High Grade"	0.1106	0.0038	0.00582	0.9718
NUCB2_AP_14519	NUCB2	ENSG00000070081	chr11 | +	AP	NA	NA	1	BLCA	neoplasm_histologic_grade	"Low Grade" vs "High Grade"	0.2159	7.35e-07	1.33e-05	1
NUCB2_AP_14520	NUCB2	ENSG00000070081	chr11 | +	AP	NA	NA	6	BLCA	neoplasm_histologic_grade	"Low Grade" vs "High Grade"	-0.2159	7.35e-07	1.33e-05	1
NUDT22_RI_16590	NUDT22	ENSG00000149761	chr11 | +	RI	1.1	1.4	1.2:1.3	BLCA	neoplasm_histologic_grade	"Low Grade" vs "High Grade"	-0.1389	0.000191	0.000615	1
NUMB_AP_28285	NUMB	ENSG00000133961	chr14 | -	AP	NA	NA	1	BLCA	neoplasm_histologic_grade	"Low Grade" vs "High Grade"	-0.2134	0.00242	0.00401	1
NUMB_AP_28287	NUMB	ENSG00000133961	chr14 | -	AP	NA	NA	8.1	BLCA	neoplasm_histologic_grade	"Low Grade" vs "High Grade"	0.2134	0.00239	0.00399	1
NUP62_AD_51124	NUP62	ENSG00000213024	chr19 | -	AD	1.2	2.1	1.3:1.4:1.5	BLCA	neoplasm_histologic_grade	"Low Grade" vs "High Grade"	0.1436	0.000125	0.000454	1
NUP62_ES_51126	NUP62	ENSG00000213024	chr19 | -	ES	1.2	2.1	1.5	BLCA	neoplasm_histologic_grade	"Low Grade" vs "High Grade"	0.1102	0.044	0.049	0.9435
NUP62_RI_51123	NUP62	ENSG00000213024	chr19 | -	RI	1.2	1.4	1.3	BLCA	neoplasm_histologic_grade	"Low Grade" vs "High Grade"	0.1145	0.000297	0.00084	1
NUP88_ES_38676	NUP88	ENSG00000108559	chr17 | -	ES	1	3	2	BLCA	neoplasm_histologic_grade	"Low Grade" vs "High Grade"	0.1043	0.000135	0.000483	0.9388
NUTM2E_RI_12332	NUTM2E	ENSG00000228570	chr10 | +	RI	6.1	6.3	6.2	BLCA	neoplasm_histologic_grade	"Low Grade" vs "High Grade"	0.1686	0.000585	0.0014	0.9435
NUTM2F_AT_86930	NUTM2F	ENSG00000130950	chr9 | -	AT	NA	NA	8	BLCA	neoplasm_histologic_grade	"Low Grade" vs "High Grade"	-0.1327	0.00481	0.00705	0.8894
NUTM2F_AT_86931	NUTM2F	ENSG00000130950	chr9 | -	AT	NA	NA	7	BLCA	neoplasm_histologic_grade	"Low Grade" vs "High Grade"	0.1327	0.00481	0.00705	0.8894
NXF1_RI_16435	NXF1	ENSG00000162231	chr11 | -	RI	11.1	11.3	11.2	BLCA	neoplasm_histologic_grade	"Low Grade" vs "High Grade"	0.1237	2.48e-05	0.00014	1
OAZ1_ES_46599	OAZ1	ENSG00000104904	chr19 | +	ES	1	4	3.2:3.3:3.4:3.5	BLCA	neoplasm_histologic_grade	"Low Grade" vs "High Grade"	0.1582	0.014	0.018	0.9812
OGFOD2_ES_25011	OGFOD2	ENSG00000111325	chr12 | +	ES	6.2	8.3	00:07:08.200000	BLCA	neoplasm_histologic_grade	"Low Grade" vs "High Grade"	0.178	1.19e-05	8.27e-05	0.9882
OLFM1_AT_88101	OLFM1	ENSG00000130558	chr9 | +	AT	NA	NA	8	BLCA	neoplasm_histologic_grade	"Low Grade" vs "High Grade"	0.1074	0.035	0.039	0.9929
OLFM1_AT_88102	OLFM1	ENSG00000130558	chr9 | +	AT	NA	NA	11	BLCA	neoplasm_histologic_grade	"Low Grade" vs "High Grade"	-0.1314	0.034	0.038	0.9929
OPA3_AT_50488	OPA3	ENSG00000125741	chr19 | -	AT	NA	NA	4	BLCA	neoplasm_histologic_grade	"Low Grade" vs "High Grade"	0.1388	0.000118	0.000433	1
OPA3_AT_50489	OPA3	ENSG00000125741	chr19 | -	AT	NA	NA	3	BLCA	neoplasm_histologic_grade	"Low Grade" vs "High Grade"	-0.1388	0.000118	0.000433	1
ORAOV1_RI_17371	ORAOV1	ENSG00000149716	chr11 | -	RI	5.1	5.3	5.2	BLCA	neoplasm_histologic_grade	"Low Grade" vs "High Grade"	0.1828	0.000412	0.00107	0.9976
ORMDL1_AA_56538	ORMDL1	ENSG00000128699	chr2 | -	AA	1	2.4	2.2:2.3	BLCA	neoplasm_histologic_grade	"Low Grade" vs "High Grade"	0.1035	0.00979	0.013	0.9812
ORMDL1_AP_56533	ORMDL1	ENSG00000128699	chr2 | -	AP	NA	NA	2.1	BLCA	neoplasm_histologic_grade	"Low Grade" vs "High Grade"	0.1928	0.00111	0.00223	0.9976
ORMDL1_AP_56534	ORMDL1	ENSG00000128699	chr2 | -	AP	NA	NA	1	BLCA	neoplasm_histologic_grade	"Low Grade" vs "High Grade"	-0.1928	0.00111	0.00223	0.9976
ORMDL1_RI_56537	ORMDL1	ENSG00000128699	chr2 | -	RI	2.2	2.4	2.3	BLCA	neoplasm_histologic_grade	"Low Grade" vs "High Grade"	0.2464	3.96e-06	3.82e-05	0.9976
OSBPL3_AD_79025	OSBPL3	ENSG00000070882	chr7 | -	AD	15.1	16	15.2	BLCA	neoplasm_histologic_grade	"Low Grade" vs "High Grade"	0.1608	0.00223	0.00378	0.9624
OSGEP_RI_26443	OSGEP	ENSG00000092094	chr14 | -	RI	4.2	4.4	4.3	BLCA	neoplasm_histologic_grade	"Low Grade" vs "High Grade"	0.1201	0.00646	0.00901	1
OXNAD1_ES_63642	OXNAD1	ENSG00000154814	chr3 | +	ES	4	6	5	BLCA	neoplasm_histologic_grade	"Low Grade" vs "High Grade"	0.1232	2.97e-05	0.000158	0.9765
P4HA3_AT_17766	P4HA3	ENSG00000149380	chr11 | -	AT	NA	NA	16	BLCA	neoplasm_histologic_grade	"Low Grade" vs "High Grade"	0.4703	6.23e-08	2.39e-06	0.9976
P4HA3_AT_17767	P4HA3	ENSG00000149380	chr11 | -	AT	NA	NA	14.2	BLCA	neoplasm_histologic_grade	"Low Grade" vs "High Grade"	-0.4703	6.23e-08	2.39e-06	0.9976
PACS1_AP_16985	PACS1	ENSG00000175115	chr11 | +	AP	NA	NA	12.1	BLCA	neoplasm_histologic_grade	"Low Grade" vs "High Grade"	0.1979	0.015	0.019	0.9694
PACS1_AP_16987	PACS1	ENSG00000175115	chr11 | +	AP	NA	NA	1	BLCA	neoplasm_histologic_grade	"Low Grade" vs "High Grade"	-0.2344	0.00711	0.00983	0.9694
PACS2_AP_29630	PACS2	ENSG00000179364	chr14 | +	AP	NA	NA	2	BLCA	neoplasm_histologic_grade	"Low Grade" vs "High Grade"	-0.1661	8.45e-06	6.7e-05	0.9953
PACS2_AP_29631	PACS2	ENSG00000179364	chr14 | +	AP	NA	NA	23.1	BLCA	neoplasm_histologic_grade	"Low Grade" vs "High Grade"	0.2382	4.43e-05	0.000211	0.9953
PAM_ES_72906	PAM	ENSG00000145730	chr5 | +	ES	13	15	14	BLCA	neoplasm_histologic_grade	"Low Grade" vs "High Grade"	-0.109	0.02	0.023	0.9906
PAPOLA_RI_29208	PAPOLA	ENSG00000090060	chr14 | +	RI	9.1	9.3	9.2	BLCA	neoplasm_histologic_grade	"Low Grade" vs "High Grade"	0.2424	0.00032	0.000883	1
PARP2_RI_26426	PARP2	ENSG00000129484	chr14 | +	RI	15.1	15.3	15.2	BLCA	neoplasm_histologic_grade	"Low Grade" vs "High Grade"	0.1122	0.00576	0.00823	1
PARP6_ES_31526	PARP6	ENSG00000137817	chr15 | -	ES	17	19	18.1:18.2	BLCA	neoplasm_histologic_grade	"Low Grade" vs "High Grade"	-0.1727	0.000163	0.000541	0.9459
PARP6_ES_31527	PARP6	ENSG00000137817	chr15 | -	ES	17	19	18.2	BLCA	neoplasm_histologic_grade	"Low Grade" vs "High Grade"	-0.1086	0.000115	0.000425	0.9788
PCBP4_ES_65137	PCBP4	ENSG00000090097	chr3 | -	ES	2.2	5	3	BLCA	neoplasm_histologic_grade	"Low Grade" vs "High Grade"	0.1501	0.000595	0.00141	0.8753
PCDHA9_AT_73784	PCDHA9	ENSG00000204961	chr5 | +	AT	NA	NA	4	BLCA	neoplasm_histologic_grade	"Low Grade" vs "High Grade"	-0.3952	9.22e-06	7.05e-05	1
PCDHA9_AT_73785	PCDHA9	ENSG00000204961	chr5 | +	AT	NA	NA	1.2	BLCA	neoplasm_histologic_grade	"Low Grade" vs "High Grade"	0.3952	9.22e-06	7.05e-05	1
PCGF3_AA_68406	PCGF3	ENSG00000185619	chr4 | +	AA	5.1	5.4	5.3	BLCA	neoplasm_histologic_grade	"Low Grade" vs "High Grade"	0.1615	0.00085	0.00187	0.9976
PCGF3_RI_68405	PCGF3	ENSG00000185619	chr4 | +	RI	5.1	5.4	5.2:5.3	BLCA	neoplasm_histologic_grade	"Low Grade" vs "High Grade"	0.1522	0.00314	0.00496	1
PCM1_ES_82839	PCM1	ENSG00000078674	chr8 | +	ES	24	27	1 day, 1:26:00	BLCA	neoplasm_histologic_grade	"Low Grade" vs "High Grade"	0.1062	0.00482	0.00705	0.9624
PCNXL2_AP_10320	PCNXL2	ENSG00000135749	chr1 | -	AP	NA	NA	25.1	BLCA	neoplasm_histologic_grade	"Low Grade" vs "High Grade"	0.2128	0.000647	0.0015	0.9553
PCNXL2_AP_10321	PCNXL2	ENSG00000135749	chr1 | -	AP	NA	NA	1	BLCA	neoplasm_histologic_grade	"Low Grade" vs "High Grade"	-0.2128	0.000661	0.00152	0.9553
PCSK5_AT_86632	PCSK5	ENSG00000099139	chr9 | +	AT	NA	NA	14.2	BLCA	neoplasm_histologic_grade	"Low Grade" vs "High Grade"	0.1662	0.011	0.014	1
PCSK5_AT_86634	PCSK5	ENSG00000099139	chr9 | +	AT	NA	NA	21	BLCA	neoplasm_histologic_grade	"Low Grade" vs "High Grade"	-0.2616	0.000595	0.00141	1
PCSK7_RI_18902	PCSK7	ENSG00000160613	chr11 | -	RI	8.1	8.3	8.2	BLCA	neoplasm_histologic_grade	"Low Grade" vs "High Grade"	0.1238	0.022	0.025	0.9906
PCYOX1_AP_53877	PCYOX1	ENSG00000116005	chr2 | +	AP	NA	NA	2	BLCA	neoplasm_histologic_grade	"Low Grade" vs "High Grade"	-0.155	0.00484	0.00708	1
PCYOX1_AP_53879	PCYOX1	ENSG00000116005	chr2 | +	AP	NA	NA	1	BLCA	neoplasm_histologic_grade	"Low Grade" vs "High Grade"	0.155	0.0051	0.0074	1
PCYT2_AA_44231	PCYT2	ENSG00000185813	chr17 | -	AA	2	3.2	3.1	BLCA	neoplasm_histologic_grade	"Low Grade" vs "High Grade"	0.1621	2.53e-05	0.000141	0.9976
PDGFA_ES_78504	PDGFA	ENSG00000197461	chr7 | -	ES	5	7	6	BLCA	neoplasm_histologic_grade	"Low Grade" vs "High Grade"	0.1968	0.00639	0.00895	0.9812
PEX5_ES_20089	PEX5	ENSG00000139197	chr12 | +	ES	8	10	9	BLCA	neoplasm_histologic_grade	"Low Grade" vs "High Grade"	0.1005	0.00247	0.00407	0.9835
PFKFB2_AT_9616	PFKFB2	ENSG00000123836	chr1 | +	AT	NA	NA	18	BLCA	neoplasm_histologic_grade	"Low Grade" vs "High Grade"	0.1116	0.00206	0.00356	1
PFKFB2_AT_9617	PFKFB2	ENSG00000123836	chr1 | +	AT	NA	NA	17	BLCA	neoplasm_histologic_grade	"Low Grade" vs "High Grade"	-0.1116	0.00206	0.00356	1
PFKM_ES_21429	PFKM	ENSG00000152556	chr12 | +	ES	7.3	9	8	BLCA	neoplasm_histologic_grade	"Low Grade" vs "High Grade"	0.151	0.000802	0.00177	1
PFKM_RI_21423	PFKM	ENSG00000152556	chr12 | +	RI	16.1	16.3	16.2	BLCA	neoplasm_histologic_grade	"Low Grade" vs "High Grade"	0.1988	0.000186	0.000602	0.9859
PFN2_AA_67256	PFN2	ENSG00000070087	chr3 | -	AA	5.4	6.2	6.1	BLCA	neoplasm_histologic_grade	"Low Grade" vs "High Grade"	0.1283	0.00171	0.00309	0.9976
PGAP2_AD_14004	PGAP2	ENSG00000148985	chr11 | +	AD	11.1	12	11.2:11.3	BLCA	neoplasm_histologic_grade	"Low Grade" vs "High Grade"	0.1301	0.00237	0.00397	0.9647
PGBD2_AA_10573	PGBD2	ENSG00000185220	chr1 | +	AA	2	4.2	4.1	BLCA	neoplasm_histologic_grade	"Low Grade" vs "High Grade"	-0.1486	0.022	0.026	0.9506
PHACTR1_AT_75366	PHACTR1	ENSG00000112137	chr6 | +	AT	NA	NA	13.3	BLCA	neoplasm_histologic_grade	"Low Grade" vs "High Grade"	0.1814	0.024	0.028	0.9553
PHACTR1_AT_75368	PHACTR1	ENSG00000112137	chr6 | +	AT	NA	NA	18	BLCA	neoplasm_histologic_grade	"Low Grade" vs "High Grade"	-0.2209	7.72e-05	0.00031	0.9553
PI4K2A_AP_12728	PI4K2A	ENSG00000155252	chr10 | +	AP	NA	NA	1	BLCA	neoplasm_histologic_grade	"Low Grade" vs "High Grade"	0.3212	2.62e-06	2.97e-05	0.9788
PI4K2A_AP_12729	PI4K2A	ENSG00000155252	chr10 | +	AP	NA	NA	3	BLCA	neoplasm_histologic_grade	"Low Grade" vs "High Grade"	-0.3212	2.62e-06	2.97e-05	0.9788
PIDD_AA_13769	PIDD	ENSG00000177595	chr11 | -	AA	2.2	3.2	3.1	BLCA	neoplasm_histologic_grade	"Low Grade" vs "High Grade"	0.1195	0.00265	0.00432	0.9435
PIDD_AP_13764	PIDD	ENSG00000177595	chr11 | -	AP	NA	NA	1	BLCA	neoplasm_histologic_grade	"Low Grade" vs "High Grade"	-0.1002	0.00404	0.00613	0.9576
PIDD_AP_13765	PIDD	ENSG00000177595	chr11 | -	AP	NA	NA	2.1	BLCA	neoplasm_histologic_grade	"Low Grade" vs "High Grade"	0.1002	0.00404	0.00613	0.9576
PIGQ_ES_32903	PIGQ	ENSG00000007541	chr16 | +	ES	11	14	12:13:00	BLCA	neoplasm_histologic_grade	"Low Grade" vs "High Grade"	-0.1751	0.031	0.035	0.9788
PIGQ_ES_32904	PIGQ	ENSG00000007541	chr16 | +	ES	11	14	13	BLCA	neoplasm_histologic_grade	"Low Grade" vs "High Grade"	-0.1072	0.015	0.019	0.9976
PIK3C3_AP_45311	PIK3C3	ENSG00000078142	chr18 | +	AP	NA	NA	23.1	BLCA	neoplasm_histologic_grade	"Low Grade" vs "High Grade"	0.1017	0.016	0.02	0.9459
PIK3C3_AP_45313	PIK3C3	ENSG00000078142	chr18 | +	AP	NA	NA	1	BLCA	neoplasm_histologic_grade	"Low Grade" vs "High Grade"	-0.2072	0.00078	0.00174	0.9459
PIK3R2_AT_48396	PIK3R2	ENSG00000105647	chr19 | +	AT	NA	NA	16.2	BLCA	neoplasm_histologic_grade	"Low Grade" vs "High Grade"	0.2272	4.33e-10	1.04e-07	1
PIK3R2_AT_48398	PIK3R2	ENSG00000105647	chr19 | +	AT	NA	NA	25	BLCA	neoplasm_histologic_grade	"Low Grade" vs "High Grade"	-0.2272	4.33e-10	1.04e-07	1
PKD1L2_AT_37758	PKD1L2	ENSG00000166473	chr16 | -	AT	NA	NA	18	BLCA	neoplasm_histologic_grade	"Low Grade" vs "High Grade"	-0.1921	0.045	0.049	0.9176
PKD1L2_AT_37759	PKD1L2	ENSG00000166473	chr16 | -	AT	NA	NA	16.2	BLCA	neoplasm_histologic_grade	"Low Grade" vs "High Grade"	0.3455	0.00294	0.00471	0.9176
PLA2G10_ES_34100	PLA2G10	ENSG00000069764	chr16 | -	ES	3	5	4	BLCA	neoplasm_histologic_grade	"Low Grade" vs "High Grade"	-0.231	0.000591	0.0014	0.9012
PLA2G15_ES_37203	PLA2G15	ENSG00000103066	chr16 | +	ES	1	3	2	BLCA	neoplasm_histologic_grade	"Low Grade" vs "High Grade"	0.2186	0.000659	0.00152	0.9859
PLA2G16_AP_16516	PLA2G16	ENSG00000176485	chr11 | -	AP	NA	NA	1	BLCA	neoplasm_histologic_grade	"Low Grade" vs "High Grade"	0.1288	0.000551	0.00134	0.9859
PLA2G16_AP_16517	PLA2G16	ENSG00000176485	chr11 | -	AP	NA	NA	2.1	BLCA	neoplasm_histologic_grade	"Low Grade" vs "High Grade"	-0.1288	0.000551	0.00134	0.9859
PLA2G6_ES_62205	PLA2G6	ENSG00000184381	chr22 | -	ES	13	15	14	BLCA	neoplasm_histologic_grade	"Low Grade" vs "High Grade"	0.1522	0.00116	0.00229	0.8871
PLA2R1_AT_55710	PLA2R1	ENSG00000153246	chr2 | -	AT	NA	NA	30	BLCA	neoplasm_histologic_grade	"Low Grade" vs "High Grade"	0.1275	1.18e-06	1.64e-05	1
PLA2R1_AT_55711	PLA2R1	ENSG00000153246	chr2 | -	AT	NA	NA	27.2	BLCA	neoplasm_histologic_grade	"Low Grade" vs "High Grade"	-0.1275	1.18e-06	1.64e-05	1
PLCE1_AT_12578	PLCE1	ENSG00000138193	chr10 | +	AT	NA	NA	34	BLCA	neoplasm_histologic_grade	"Low Grade" vs "High Grade"	0.1086	0.00214	0.00367	1
PLCE1_AT_12579	PLCE1	ENSG00000138193	chr10 | +	AT	NA	NA	33.2	BLCA	neoplasm_histologic_grade	"Low Grade" vs "High Grade"	-0.1086	0.00214	0.00367	1
PLEC_AP_85516	PLEC	ENSG00000178209	chr8 | -	AP	NA	NA	9	BLCA	neoplasm_histologic_grade	"Low Grade" vs "High Grade"	0.1109	0.00106	0.00214	0.9553
PLEKHB2_AP_55366	PLEKHB2	ENSG00000115762	chr2 | +	AP	NA	NA	2	BLCA	neoplasm_histologic_grade	"Low Grade" vs "High Grade"	0.1442	0.011	0.014	1
PLEKHB2_AP_55368	PLEKHB2	ENSG00000115762	chr2 | +	AP	NA	NA	1	BLCA	neoplasm_histologic_grade	"Low Grade" vs "High Grade"	-0.1461	0.013	0.016	1
PLEKHG6_AP_19820	PLEKHG6	ENSG00000008323	chr12 | +	AP	NA	NA	17	BLCA	neoplasm_histologic_grade	"Low Grade" vs "High Grade"	0.1504	0.00778	0.011	0.8706
PLEKHG6_AP_19821	PLEKHG6	ENSG00000008323	chr12 | +	AP	NA	NA	2	BLCA	neoplasm_histologic_grade	"Low Grade" vs "High Grade"	-0.1376	0.015	0.018	0.8706
PLS3_ES_89927	PLS3	ENSG00000102024	chrX | +	ES	3	6	5	BLCA	neoplasm_histologic_grade	"Low Grade" vs "High Grade"	0.3435	0.000215	0.000668	1
PLXNC1_AT_23722	PLXNC1	ENSG00000136040	chr12 | +	AT	NA	NA	32	BLCA	neoplasm_histologic_grade	"Low Grade" vs "High Grade"	-0.1626	1.1e-05	7.72e-05	1
PLXNC1_AT_23723	PLXNC1	ENSG00000136040	chr12 | +	AT	NA	NA	31.2	BLCA	neoplasm_histologic_grade	"Low Grade" vs "High Grade"	0.1626	1.1e-05	7.72e-05	1
PMFBP1_AT_37551	PMFBP1	ENSG00000118557	chr16 | -	AT	NA	NA	22.4	BLCA	neoplasm_histologic_grade	"Low Grade" vs "High Grade"	-0.1028	0.00131	0.00251	0.9624
PMFBP1_AT_37552	PMFBP1	ENSG00000118557	chr16 | -	AT	NA	NA	23	BLCA	neoplasm_histologic_grade	"Low Grade" vs "High Grade"	0.1028	0.00131	0.00251	0.9624
PNPLA6_AP_47108	PNPLA6	ENSG00000032444	chr19 | +	AP	NA	NA	6.1	BLCA	neoplasm_histologic_grade	"Low Grade" vs "High Grade"	-0.2057	0.000448	0.00113	0.9247
PNPLA6_AP_47110	PNPLA6	ENSG00000032444	chr19 | +	AP	NA	NA	2	BLCA	neoplasm_histologic_grade	"Low Grade" vs "High Grade"	0.1602	5.51e-05	0.000242	0.9247
POFUT2_AA_60871	POFUT2	ENSG00000186866	chr21 | -	AA	8.1	8.5	8.3:8.4	BLCA	neoplasm_histologic_grade	"Low Grade" vs "High Grade"	0.1594	0.000282	0.000813	0.9906
POFUT2_AD_60872	POFUT2	ENSG00000186866	chr21 | -	AD	8.1	8.5	8.2:8.3	BLCA	neoplasm_histologic_grade	"Low Grade" vs "High Grade"	0.2164	0.000439	0.00112	0.9929
POFUT2_ES_60873	POFUT2	ENSG00000186866	chr21 | -	ES	8.1	8.5	8.3	BLCA	neoplasm_histologic_grade	"Low Grade" vs "High Grade"	0.2057	0.00389	0.00594	0.9835
POFUT2_RI_60870	POFUT2	ENSG00000186866	chr21 | -	RI	8.1	8.5	8.2:8.3:8.4	BLCA	neoplasm_histologic_grade	"Low Grade" vs "High Grade"	0.1852	0.00112	0.00225	0.9953
POLB_AP_83706	POLB	ENSG00000070501	chr8 | +	AP	NA	NA	13.1	BLCA	neoplasm_histologic_grade	"Low Grade" vs "High Grade"	0.1115	0.000137	0.000487	1
POLB_AP_83707	POLB	ENSG00000070501	chr8 | +	AP	NA	NA	1	BLCA	neoplasm_histologic_grade	"Low Grade" vs "High Grade"	-0.1115	0.000137	0.000487	1
POLR2G_RI_16420	POLR2G	ENSG00000168002	chr11 | +	RI	2.1	2.4	2.2:2.3	BLCA	neoplasm_histologic_grade	"Low Grade" vs "High Grade"	0.1307	0.011	0.014	0.9906
POM121_AT_79927	POM121	ENSG00000196313	chr7 | +	AT	NA	NA	17	BLCA	neoplasm_histologic_grade	"Low Grade" vs "High Grade"	-0.1215	8.13e-05	0.000322	1
POM121_AT_79928	POM121	ENSG00000196313	chr7 | +	AT	NA	NA	18	BLCA	neoplasm_histologic_grade	"Low Grade" vs "High Grade"	0.1214	8.13e-05	0.000322	1
POMZP3_ES_80187	POMZP3	ENSG00000146707	chr7 | -	ES	3	5	4	BLCA	neoplasm_histologic_grade	"Low Grade" vs "High Grade"	0.1575	1.28e-05	8.71e-05	1
POPDC2_AD_66348	POPDC2	ENSG00000121577	chr3 | -	AD	3.1	5	3.2	BLCA	neoplasm_histologic_grade	"Low Grade" vs "High Grade"	0.1158	0.000763	0.00171	0.8541
PPARG_AP_63414	PPARG	ENSG00000132170	chr3 | +	AP	NA	NA	2	BLCA	neoplasm_histologic_grade	"Low Grade" vs "High Grade"	-0.1496	9.84e-05	0.000378	0.9059
PPFIBP2_AP_14200	PPFIBP2	ENSG00000166387	chr11 | +	AP	NA	NA	8	BLCA	neoplasm_histologic_grade	"Low Grade" vs "High Grade"	0.2439	3.36e-06	3.43e-05	0.8894
PPFIBP2_AP_14203	PPFIBP2	ENSG00000166387	chr11 | +	AP	NA	NA	1	BLCA	neoplasm_histologic_grade	"Low Grade" vs "High Grade"	-0.1431	8.71e-11	7.94e-08	0.8894
PPP1CC_AP_24497	PPP1CC	ENSG00000186298	chr12 | -	AP	NA	NA	1	BLCA	neoplasm_histologic_grade	"Low Grade" vs "High Grade"	-0.1435	0.0028	0.00449	1
PPP1CC_AP_24498	PPP1CC	ENSG00000186298	chr12 | -	AP	NA	NA	2.1	BLCA	neoplasm_histologic_grade	"Low Grade" vs "High Grade"	0.1435	0.0028	0.00449	1
PPP2R4_AP_87830	PPP2R4	ENSG00000119383	chr9 | +	AP	NA	NA	2.1	BLCA	neoplasm_histologic_grade	"Low Grade" vs "High Grade"	-0.1125	4.46e-05	0.000212	0.9953
PPP2R4_AP_87833	PPP2R4	ENSG00000119383	chr9 | +	AP	NA	NA	11	BLCA	neoplasm_histologic_grade	"Low Grade" vs "High Grade"	0.1222	0.000426	0.00109	0.9953
PPP3CC_ES_83012	PPP3CC	ENSG00000120910	chr8 | +	ES	13	15	14	BLCA	neoplasm_histologic_grade	"Low Grade" vs "High Grade"	-0.1287	3.61e-05	0.000181	0.9929
PPP4C_ES_94130	PPP4C	ENSG00000149923	chr16 | +	ES	4	6	5.1:5.2	BLCA	neoplasm_histologic_grade	"Low Grade" vs "High Grade"	0.1339	0.00209	0.00359	0.9788
PRKAB1_AP_24704	PRKAB1	ENSG00000111725	chr12 | +	AP	NA	NA	2	BLCA	neoplasm_histologic_grade	"Low Grade" vs "High Grade"	0.1139	0.00761	0.01	1
PRKAB1_AP_24705	PRKAB1	ENSG00000111725	chr12 | +	AP	NA	NA	1.1	BLCA	neoplasm_histologic_grade	"Low Grade" vs "High Grade"	-0.1139	0.00788	0.011	1
PRKAR1A_AP_43141	PRKAR1A	ENSG00000108946	chr17 | +	AP	NA	NA	1	BLCA	neoplasm_histologic_grade	"Low Grade" vs "High Grade"	0.1228	0.000824	0.00182	0.9835
PRKAR1A_AP_43143	PRKAR1A	ENSG00000108946	chr17 | +	AP	NA	NA	2.1	BLCA	neoplasm_histologic_grade	"Low Grade" vs "High Grade"	-0.1268	0.000235	0.000718	0.9835
PRMT2_ES_60964	PRMT2	ENSG00000160310	chr21 | +	ES	1.1	2	1.3	BLCA	neoplasm_histologic_grade	"Low Grade" vs "High Grade"	-0.1703	0.000576	0.00138	0.9976
PRMT2_RI_60962	PRMT2	ENSG00000160310	chr21 | +	RI	1.1	1.3	1.2	BLCA	neoplasm_histologic_grade	"Low Grade" vs "High Grade"	0.1538	9.89e-05	0.000379	0.9882
PRMT7_AA_37220	PRMT7	ENSG00000132600	chr16 | +	AA	16	17.2	17.1	BLCA	neoplasm_histologic_grade	"Low Grade" vs "High Grade"	0.1379	2.5e-05	0.00014	1
PRPF3_ES_7468	PRPF3	ENSG00000117360	chr1 | +	ES	3	5	4	BLCA	neoplasm_histologic_grade	"Low Grade" vs "High Grade"	0.1696	0.00143	0.00267	0.9788
PRPF8_RI_38361	PRPF8	ENSG00000174231	chr17 | -	RI	1.1	1.3	1.2	BLCA	neoplasm_histologic_grade	"Low Grade" vs "High Grade"	0.1728	0.00296	0.00473	0.8729
PSAP_AA_12067	PSAP	ENSG00000197746	chr10 | -	AA	7	8.2	8.1	BLCA	neoplasm_histologic_grade	"Low Grade" vs "High Grade"	0.2018	1.07e-06	1.57e-05	0.9976
PSEN1_AP_28260	PSEN1	ENSG00000080815	chr14 | +	AP	NA	NA	1.1	BLCA	neoplasm_histologic_grade	"Low Grade" vs "High Grade"	-0.1274	0.00139	0.00262	1
PSMC3IP_AD_41076	PSMC3IP	ENSG00000131470	chr17 | -	AD	4.2	5.1	4.3	BLCA	neoplasm_histologic_grade	"Low Grade" vs "High Grade"	0.1004	0.012	0.015	0.9671
PSMC5_AA_43010	PSMC5	ENSG00000087191	chr17 | +	AA	1	2.3	2.1:2.2	BLCA	neoplasm_histologic_grade	"Low Grade" vs "High Grade"	0.1151	5.61e-05	0.000244	1
PSMC5_RI_43009	PSMC5	ENSG00000087191	chr17 | +	RI	2.1	2.3	2.2	BLCA	neoplasm_histologic_grade	"Low Grade" vs "High Grade"	0.1941	0.0002	0.00064	0.9976
PSME3_AP_41143	PSME3	ENSG00000131467	chr17 | +	AP	NA	NA	1	BLCA	neoplasm_histologic_grade	"Low Grade" vs "High Grade"	0.1555	0.00365	0.00565	1
PSME3_AP_41144	PSME3	ENSG00000131467	chr17 | +	AP	NA	NA	4	BLCA	neoplasm_histologic_grade	"Low Grade" vs "High Grade"	-0.1555	0.00365	0.00565	1
PSPH_RI_79777	PSPH	ENSG00000146733	chr7 | -	RI	8.1	8.3	8.2	BLCA	neoplasm_histologic_grade	"Low Grade" vs "High Grade"	-0.1838	0.000497	0.00123	1
PTGER3_AT_3413	PTGER3	ENSG00000050628	chr1 | -	AT	NA	NA	12	BLCA	neoplasm_histologic_grade	"Low Grade" vs "High Grade"	-0.1005	3.57e-05	0.000181	1
PTGER3_AT_3415	PTGER3	ENSG00000050628	chr1 | -	AT	NA	NA	4	BLCA	neoplasm_histologic_grade	"Low Grade" vs "High Grade"	-0.1095	2.45e-08	1.34e-06	1
PTGER3_AT_3416	PTGER3	ENSG00000050628	chr1 | -	AT	NA	NA	8	BLCA	neoplasm_histologic_grade	"Low Grade" vs "High Grade"	0.3181	2.35e-08	1.32e-06	1
PTGIR_AT_50569	PTGIR	ENSG00000160013	chr19 | -	AT	NA	NA	4.2	BLCA	neoplasm_histologic_grade	"Low Grade" vs "High Grade"	-0.1538	0.0012	0.00233	1
PTGIR_AT_50570	PTGIR	ENSG00000160013	chr19 | -	AT	NA	NA	3	BLCA	neoplasm_histologic_grade	"Low Grade" vs "High Grade"	0.1538	0.0012	0.00233	1
PTGR1_AP_87213	PTGR1	ENSG00000106853	chr9 | -	AP	NA	NA	1	BLCA	neoplasm_histologic_grade	"Low Grade" vs "High Grade"	0.216	0.000281	0.000811	0.9976
PTGR1_AP_87215	PTGR1	ENSG00000106853	chr9 | -	AP	NA	NA	2	BLCA	neoplasm_histologic_grade	"Low Grade" vs "High Grade"	-0.216	0.000281	0.000811	0.9976
PTK2_RI_85302	PTK2	ENSG00000169398	chr8 | -	RI	39.2	39.5	39.3:39.4	BLCA	neoplasm_histologic_grade	"Low Grade" vs "High Grade"	0.1228	0.00816	0.011	0.9059
PTK7_AP_76243	PTK7	ENSG00000112655	chr6 | +	AP	NA	NA	1	BLCA	neoplasm_histologic_grade	"Low Grade" vs "High Grade"	-0.2125	0.00241	0.00401	0.9529
PTPRC_AT_9320	PTPRC	ENSG00000081237	chr1 | +	AT	NA	NA	34	BLCA	neoplasm_histologic_grade	"Low Grade" vs "High Grade"	-0.1678	4.4e-05	0.000211	1
PTPRC_AT_9321	PTPRC	ENSG00000081237	chr1 | +	AT	NA	NA	4	BLCA	neoplasm_histologic_grade	"Low Grade" vs "High Grade"	0.1708	3.17e-05	0.000166	1
PTPRO_AT_20575	PTPRO	ENSG00000151490	chr12 | +	AT	NA	NA	26.3	BLCA	neoplasm_histologic_grade	"Low Grade" vs "High Grade"	-0.4494	2.83e-09	3.98e-07	0.9671
PTPRO_AT_20576	PTPRO	ENSG00000151490	chr12 | +	AT	NA	NA	9.2	BLCA	neoplasm_histologic_grade	"Low Grade" vs "High Grade"	0.4494	2.83e-09	3.98e-07	0.9671
PXN_AP_24743	PXN	ENSG00000089159	chr12 | -	AP	NA	NA	10	BLCA	neoplasm_histologic_grade	"Low Grade" vs "High Grade"	0.1192	0.00808	0.011	0.9929
PXN_AP_24744	PXN	ENSG00000089159	chr12 | -	AP	NA	NA	3	BLCA	neoplasm_histologic_grade	"Low Grade" vs "High Grade"	-0.1009	0.00123	0.00239	0.9929
PYHIN1_AT_8389	PYHIN1	ENSG00000163564	chr1 | +	AT	NA	NA	5	BLCA	neoplasm_histologic_grade	"Low Grade" vs "High Grade"	0.1191	0.000375	0.00101	1
PYHIN1_AT_8390	PYHIN1	ENSG00000163564	chr1 | +	AT	NA	NA	10	BLCA	neoplasm_histologic_grade	"Low Grade" vs "High Grade"	-0.1191	0.000375	0.00101	1
PYROXD1_AP_20692	PYROXD1	ENSG00000121350	chr12 | +	AP	NA	NA	1	BLCA	neoplasm_histologic_grade	"Low Grade" vs "High Grade"	-0.1344	0.00254	0.00417	0.9529
PYROXD1_AP_20693	PYROXD1	ENSG00000121350	chr12 | +	AP	NA	NA	2	BLCA	neoplasm_histologic_grade	"Low Grade" vs "High Grade"	0.1344	0.00254	0.00417	0.9529
QSER1_AP_14864	QSER1	ENSG00000060749	chr11 | +	AP	NA	NA	1	BLCA	neoplasm_histologic_grade	"Low Grade" vs "High Grade"	-0.1284	0.000674	0.00155	0.9835
QSER1_AP_14865	QSER1	ENSG00000060749	chr11 | +	AP	NA	NA	2	BLCA	neoplasm_histologic_grade	"Low Grade" vs "High Grade"	0.1284	0.000674	0.00155	0.9835
R3HDM4_RI_46348	R3HDM4	ENSG00000198858	chr19 | -	RI	3.1	3.3	3.2	BLCA	neoplasm_histologic_grade	"Low Grade" vs "High Grade"	0.1506	0.024	0.028	0.9318
RAB11FIP1_AP_83362	RAB11FIP1	ENSG00000156675	chr8 | -	AP	NA	NA	2.1	BLCA	neoplasm_histologic_grade	"Low Grade" vs "High Grade"	0.214	0.033	0.038	1
RAB11FIP1_AP_83363	RAB11FIP1	ENSG00000156675	chr8 | -	AP	NA	NA	1.1	BLCA	neoplasm_histologic_grade	"Low Grade" vs "High Grade"	-0.214	0.033	0.038	1
RAB15_AD_27924	RAB15	ENSG00000139998	chr14 | -	AD	6.1	7	6.2:6.3	BLCA	neoplasm_histologic_grade	"Low Grade" vs "High Grade"	0.2034	0.000186	0.000602	0.8988
RAB3GAP1_ES_55433	RAB3GAP1	ENSG00000115839	chr2 | +	ES	3.1	6	04:05:00	BLCA	neoplasm_histologic_grade	"Low Grade" vs "High Grade"	0.2118	0.00375	0.00576	1
RABEP2_AP_35888	RABEP2	ENSG00000177548	chr16 | -	AP	NA	NA	2.1	BLCA	neoplasm_histologic_grade	"Low Grade" vs "High Grade"	-0.1411	0.00779	0.011	1
RABEP2_AP_35889	RABEP2	ENSG00000177548	chr16 | -	AP	NA	NA	1	BLCA	neoplasm_histologic_grade	"Low Grade" vs "High Grade"	0.1411	0.00779	0.011	1
RAD1_ES_71743	RAD1	ENSG00000113456	chr5 | -	ES	5	8	6	BLCA	neoplasm_histologic_grade	"Low Grade" vs "High Grade"	0.1363	0.015	0.018	0.9271
RAD51B_AT_28110	RAD51B	ENSG00000182185	chr14 | +	AT	NA	NA	12	BLCA	neoplasm_histologic_grade	"Low Grade" vs "High Grade"	-0.2011	7.23e-05	0.000297	0.9976
RANBP1_AP_61136	RANBP1	ENSG00000099901	chr22 | +	AP	NA	NA	1	BLCA	neoplasm_histologic_grade	"Low Grade" vs "High Grade"	0.101	4.82e-05	0.000223	1
RANBP1_AP_61137	RANBP1	ENSG00000099901	chr22 | +	AP	NA	NA	2	BLCA	neoplasm_histologic_grade	"Low Grade" vs "High Grade"	-0.101	4.82e-05	0.000223	1
RANBP3_AA_46963	RANBP3	ENSG00000031823	chr19 | -	AA	8	10.2	10.1	BLCA	neoplasm_histologic_grade	"Low Grade" vs "High Grade"	0.102	0.000139	0.000491	0.9953
RANGRF_AD_39166	RANGRF	ENSG00000108961	chr17 | +	AD	3.1	3.5	3.2:3.3	BLCA	neoplasm_histologic_grade	"Low Grade" vs "High Grade"	0.1214	0.00735	0.01	0.9741
RARA_AP_40856	RARA	ENSG00000131759	chr17 | +	AP	NA	NA	4	BLCA	neoplasm_histologic_grade	"Low Grade" vs "High Grade"	0.1135	0.00759	0.01	1
RARA_AP_40857	RARA	ENSG00000131759	chr17 | +	AP	NA	NA	2	BLCA	neoplasm_histologic_grade	"Low Grade" vs "High Grade"	-0.2351	1.21e-07	4.09e-06	1
RASA4_AP_81120	RASA4	ENSG00000105808	chr7 | -	AP	NA	NA	2.1	BLCA	neoplasm_histologic_grade	"Low Grade" vs "High Grade"	-0.1264	0.000869	0.00188	0.9624
RASA4_AP_81121	RASA4	ENSG00000105808	chr7 | -	AP	NA	NA	1.1	BLCA	neoplasm_histologic_grade	"Low Grade" vs "High Grade"	0.1264	0.000869	0.00188	0.9624
RASSF5_AP_9585	RASSF5	ENSG00000136653	chr1 | +	AP	NA	NA	1	BLCA	neoplasm_histologic_grade	"Low Grade" vs "High Grade"	0.1342	0.013	0.016	0.9294
RASSF5_AP_9586	RASSF5	ENSG00000136653	chr1 | +	AP	NA	NA	3	BLCA	neoplasm_histologic_grade	"Low Grade" vs "High Grade"	-0.1342	0.013	0.016	0.9294
RASSF8_AT_20838	RASSF8	ENSG00000123094	chr12 | +	AT	NA	NA	9	BLCA	neoplasm_histologic_grade	"Low Grade" vs "High Grade"	0.2472	2.62e-07	6.82e-06	1
RASSF8_AT_20839	RASSF8	ENSG00000123094	chr12 | +	AT	NA	NA	8	BLCA	neoplasm_histologic_grade	"Low Grade" vs "High Grade"	-0.2472	2.62e-07	6.82e-06	1
RBCK1_AT_58450	RBCK1	ENSG00000125826	chr20 | +	AT	NA	NA	3	BLCA	neoplasm_histologic_grade	"Low Grade" vs "High Grade"	-0.1064	2.22e-05	0.000129	1
RBCK1_AT_58451	RBCK1	ENSG00000125826	chr20 | +	AT	NA	NA	13	BLCA	neoplasm_histologic_grade	"Low Grade" vs "High Grade"	0.1064	2.22e-05	0.000129	1
RBM39_ES_95936	RBM39	ENSG00000131051	chr20 | -	ES	3	6	04:05:00	BLCA	neoplasm_histologic_grade	"Low Grade" vs "High Grade"	0.1144	0.00453	0.00671	0.9059
RBM42_ES_49233	RBM42	ENSG00000126254	chr19 | +	ES	3.1	9.2	3.2:4:6.1:6.2:6.3:7:8:9.1	BLCA	neoplasm_histologic_grade	"Low Grade" vs "High Grade"	0.1115	1.84e-05	0.000116	0.9624
RBM6_RI_64936	RBM6	ENSG00000004534	chr3 | +	RI	14.1	14.3	14.2	BLCA	neoplasm_histologic_grade	"Low Grade" vs "High Grade"	0.1894	2.82e-06	3.06e-05	1
RBM7_RI_18823	RBM7	ENSG00000076053	chr11 | +	RI	4.2	4.4	4.3	BLCA	neoplasm_histologic_grade	"Low Grade" vs "High Grade"	0.2086	0.000738	0.00166	1
RBMX_RI_90220	RBMX	ENSG00000147274	chrX | -	RI	8.1	8.4	8.2:8.3	BLCA	neoplasm_histologic_grade	"Low Grade" vs "High Grade"	0.2088	4.72e-05	0.000221	1
RC3H2_AT_87484	RC3H2	ENSG00000056586	chr9 | -	AT	NA	NA	22	BLCA	neoplasm_histologic_grade	"Low Grade" vs "High Grade"	-0.1111	0.022	0.026	1
RCAN1_AP_60491	RCAN1	ENSG00000159200	chr21 | -	AP	NA	NA	7.1	BLCA	neoplasm_histologic_grade	"Low Grade" vs "High Grade"	0.2509	0.000116	0.000428	1
RCAN1_AP_60494	RCAN1	ENSG00000159200	chr21 | -	AP	NA	NA	5	BLCA	neoplasm_histologic_grade	"Low Grade" vs "High Grade"	-0.2549	0.000269	0.00079	1
RCC1_ES_1388	RCC1	ENSG00000180198	chr1 | +	ES	6	8	7	BLCA	neoplasm_histologic_grade	"Low Grade" vs "High Grade"	0.157	1.59e-05	0.000104	0.9906
RDM1_AT_40348	RDM1	ENSG00000187456	chr17 | -	AT	NA	NA	6	BLCA	neoplasm_histologic_grade	"Low Grade" vs "High Grade"	-0.2637	0.000416	0.00108	0.9859
RDM1_AT_40349	RDM1	ENSG00000187456	chr17 | -	AT	NA	NA	4.2	BLCA	neoplasm_histologic_grade	"Low Grade" vs "High Grade"	0.2637	0.000416	0.00108	0.9859
RELL2_RI_73812	RELL2	ENSG00000164620	chr5 | +	RI	1.1	1.4	1.2:1.3	BLCA	neoplasm_histologic_grade	"Low Grade" vs "High Grade"	0.1074	0.0062	0.00871	0.9529
RFX3_AT_85742	RFX3	ENSG00000080298	chr9 | -	AT	NA	NA	17.2	BLCA	neoplasm_histologic_grade	"Low Grade" vs "High Grade"	-0.1232	3.03e-06	3.22e-05	1
RFX3_AT_85744	RFX3	ENSG00000080298	chr9 | -	AT	NA	NA	19	BLCA	neoplasm_histologic_grade	"Low Grade" vs "High Grade"	0.1294	3.09e-06	3.24e-05	1
RFX5_ES_7609	RFX5	ENSG00000143390	chr1 | -	ES	6.2	8	7	BLCA	neoplasm_histologic_grade	"Low Grade" vs "High Grade"	0.1804	0.000622	0.00146	0.9835
RGS3_AP_87289	RGS3	ENSG00000138835	chr9 | +	AP	NA	NA	25	BLCA	neoplasm_histologic_grade	"Low Grade" vs "High Grade"	0.2317	3.22e-07	7.87e-06	0.9953
RHOF_AT_24897	RHOF	ENSG00000139725	chr12 | -	AT	NA	NA	4.2	BLCA	neoplasm_histologic_grade	"Low Grade" vs "High Grade"	0.1048	5.38e-05	0.000239	1
RHOF_AT_24898	RHOF	ENSG00000139725	chr12 | -	AT	NA	NA	5	BLCA	neoplasm_histologic_grade	"Low Grade" vs "High Grade"	-0.1048	5.38e-05	0.000239	1
RHOT1_ES_40176	RHOT1	ENSG00000126858	chr17 | +	ES	20	22	21	BLCA	neoplasm_histologic_grade	"Low Grade" vs "High Grade"	0.1074	2.64e-05	0.000145	0.9271
RHOT2_RI_32938	RHOT2	ENSG00000140983	chr16 | +	RI	9.3	9.5	9.4	BLCA	neoplasm_histologic_grade	"Low Grade" vs "High Grade"	0.1864	4.46e-05	0.000212	1
RMDN1_AA_84373	RMDN1	ENSG00000176623	chr8 | -	AA	13.2	14.2	14.1	BLCA	neoplasm_histologic_grade	"Low Grade" vs "High Grade"	-0.1996	0.000841	0.00185	1
RNF121_ES_17462	RNF121	ENSG00000137522	chr11 | +	ES	3	6.1	4	BLCA	neoplasm_histologic_grade	"Low Grade" vs "High Grade"	0.1642	0.00552	0.00792	1
RNF128_AP_89804	RNF128	ENSG00000133135	chrX | +	AP	NA	NA	2	BLCA	neoplasm_histologic_grade	"Low Grade" vs "High Grade"	-0.2958	0.00317	0.005	0.9176
RNF128_AP_89805	RNF128	ENSG00000133135	chrX | +	AP	NA	NA	1	BLCA	neoplasm_histologic_grade	"Low Grade" vs "High Grade"	0.2958	0.00317	0.005	0.9176
RNF166_AP_38013	RNF166	ENSG00000158717	chr16 | -	AP	NA	NA	5.1	BLCA	neoplasm_histologic_grade	"Low Grade" vs "High Grade"	0.128	0.00419	0.00629	0.9835
RNF4_AP_68565	RNF4	ENSG00000063978	chr4 | +	AP	NA	NA	1.1	BLCA	neoplasm_histologic_grade	"Low Grade" vs "High Grade"	-0.1157	0.000315	0.00088	1
RNF4_AP_68566	RNF4	ENSG00000063978	chr4 | +	AP	NA	NA	4	BLCA	neoplasm_histologic_grade	"Low Grade" vs "High Grade"	0.1082	0.000299	0.000843	1
RNF6_AP_25511	RNF6	ENSG00000127870	chr13 | -	AP	NA	NA	2	BLCA	neoplasm_histologic_grade	"Low Grade" vs "High Grade"	-0.1244	0.00927	0.012	1
RNH1_ES_13677	RNH1	ENSG00000023191	chr11 | -	ES	1	4.2	3	BLCA	neoplasm_histologic_grade	"Low Grade" vs "High Grade"	0.1255	0.000154	0.000526	0.9953
RNH1_ES_13680	RNH1	ENSG00000023191	chr11 | -	ES	1	4.3	3	BLCA	neoplasm_histologic_grade	"Low Grade" vs "High Grade"	0.1187	0.000562	0.00136	0.9976
RNPS1_ES_33261	RNPS1	ENSG00000205937	chr16 | -	ES	1.1	4	3	BLCA	neoplasm_histologic_grade	"Low Grade" vs "High Grade"	-0.1029	3.76e-05	0.000187	0.9953
ROGDI_AD_33857	ROGDI	ENSG00000067836	chr16 | -	AD	4.1	5	4.2	BLCA	neoplasm_histologic_grade	"Low Grade" vs "High Grade"	0.1154	0.00125	0.00241	0.9976
ROGDI_ES_33858	ROGDI	ENSG00000067836	chr16 | -	ES	3	5	4.1:4.2	BLCA	neoplasm_histologic_grade	"Low Grade" vs "High Grade"	0.1025	0.011	0.014	0.9247
RPL27A_AA_14257	RPL27A	ENSG00000166441	chr11 | +	AA	1.3	2.2	2.1	BLCA	neoplasm_histologic_grade	"Low Grade" vs "High Grade"	-0.1674	0.0024	0.00401	1
RPL6_ES_399926	RPL6	ENSG00000089009	chr12 | -	ES	1.1	5	1.2:2:3:4	BLCA	neoplasm_histologic_grade	"Low Grade" vs "High Grade"	-0.1244	3.07e-06	3.24e-05	0.8282
RPS15_RI_46483	RPS15	ENSG00000115268	chr19 | +	RI	3.3	3.6	3.4:3.5	BLCA	neoplasm_histologic_grade	"Low Grade" vs "High Grade"	-0.1067	0.02	0.023	0.8847
RPS15A_ES_34260	RPS15A	ENSG00000134419	chr16 | -	ES	2.2	5.1	3.1:3.2:3.3	BLCA	neoplasm_histologic_grade	"Low Grade" vs "High Grade"	-0.1276	0.000206	0.000652	0.9412
RPS2_RI_33175	RPS2	ENSG00000140988	chr16 | -	RI	1.1	1.3	1.2	BLCA	neoplasm_histologic_grade	"Low Grade" vs "High Grade"	-0.1434	0.016	0.019	1
RPS20_RI_83890	RPS20	ENSG00000008988	chr8 | -	RI	1.2	1.4	1.3	BLCA	neoplasm_histologic_grade	"Low Grade" vs "High Grade"	0.1118	0.021	0.024	0.9882
RPS21_AD_60076	RPS21	ENSG00000171858	chr20 | +	AD	3.1	3.5	3.2:3.3	BLCA	neoplasm_histologic_grade	"Low Grade" vs "High Grade"	0.1058	0.021	0.024	0.9671
RPS24_AA_12297	RPS24	ENSG00000138326	chr10 | +	AA	4	5.2	5.1	BLCA	neoplasm_histologic_grade	"Low Grade" vs "High Grade"	0.1104	0.015	0.018	1
RPS24_ES_12295	RPS24	ENSG00000138326	chr10 | +	ES	4	6	5.1:5.2	BLCA	neoplasm_histologic_grade	"Low Grade" vs "High Grade"	0.4131	7.96e-06	6.48e-05	1
RPS24_ES_12296	RPS24	ENSG00000138326	chr10 | +	ES	4	6	5.2	BLCA	neoplasm_histologic_grade	"Low Grade" vs "High Grade"	0.2892	0.000105	0.000399	1
RPS6KA5_ES_28834	RPS6KA5	ENSG00000100784	chr14 | -	ES	1	4	3	BLCA	neoplasm_histologic_grade	"Low Grade" vs "High Grade"	0.2301	0.00875	0.012	0.9224
RPS9_ES_51825	RPS9	ENSG00000170889	chr19 | +	ES	3	4.5	4.1:4.3	BLCA	neoplasm_histologic_grade	"Low Grade" vs "High Grade"	0.1316	0.00115	0.00227	1
RPUSD1_AP_33006	RPUSD1	ENSG00000007376	chr16 | -	AP	NA	NA	1	BLCA	neoplasm_histologic_grade	"Low Grade" vs "High Grade"	-0.2276	7.61e-05	0.000307	0.9529
RPUSD1_AP_33007	RPUSD1	ENSG00000007376	chr16 | -	AP	NA	NA	2.1	BLCA	neoplasm_histologic_grade	"Low Grade" vs "High Grade"	0.2276	7.61e-05	0.000307	0.9529
RQCD1_AT_57493	RQCD1	ENSG00000144580	chr2 | +	AT	NA	NA	12.3	BLCA	neoplasm_histologic_grade	"Low Grade" vs "High Grade"	0.1455	3.7e-06	3.7e-05	1
RQCD1_AT_57495	RQCD1	ENSG00000144580	chr2 | +	AT	NA	NA	11	BLCA	neoplasm_histologic_grade	"Low Grade" vs "High Grade"	-0.1455	3.7e-06	3.7e-05	1
RQCD1_ES_57497	RQCD1	ENSG00000144580	chr2 | +	ES	6	8	7	BLCA	neoplasm_histologic_grade	"Low Grade" vs "High Grade"	0.1011	0.0047	0.00693	1
RQCD1_ES_57499	RQCD1	ENSG00000144580	chr2 | +	ES	1	3	2	BLCA	neoplasm_histologic_grade	"Low Grade" vs "High Grade"	0.1359	0.00734	0.01	0.9694
RSU1_RI_10880	RSU1	ENSG00000148484	chr10 | -	RI	1.1	1.3	1.2	BLCA	neoplasm_histologic_grade	"Low Grade" vs "High Grade"	-0.1633	0.000395	0.00104	0.9859
RTEL1_AT_60144	RTEL1	ENSG00000258366	chr20 | +	AT	NA	NA	35.2	BLCA	neoplasm_histologic_grade	"Low Grade" vs "High Grade"	0.1411	0.00224	0.00379	1
RTEL1_AT_60145	RTEL1	ENSG00000258366	chr20 | +	AT	NA	NA	36	BLCA	neoplasm_histologic_grade	"Low Grade" vs "High Grade"	-0.1411	0.00224	0.00379	1
RTN2_ES_50466	RTN2	ENSG00000125744	chr19 | -	ES	4.1	6	5	BLCA	neoplasm_histologic_grade	"Low Grade" vs "High Grade"	-0.1122	0.00547	0.00786	0.9812
RTN4_AP_53582	RTN4	ENSG00000115310	chr2 | -	AP	NA	NA	7	BLCA	neoplasm_histologic_grade	"Low Grade" vs "High Grade"	0.2248	0.00923	0.012	0.9906
RTN4_AP_53584	RTN4	ENSG00000115310	chr2 | -	AP	NA	NA	2.1	BLCA	neoplasm_histologic_grade	"Low Grade" vs "High Grade"	-0.2344	0.00961	0.013	0.9906
RUVBL2_ES_50865	RUVBL2	ENSG00000183207	chr19 | +	ES	1.2	2	1.4:1.5:1.6	BLCA	neoplasm_histologic_grade	"Low Grade" vs "High Grade"	0.195	0.043	0.047	0.9976
RWDD2A_RI_76867	RWDD2A	ENSG00000013392	chr6 | +	RI	2.2	2.4	2.3	BLCA	neoplasm_histologic_grade	"Low Grade" vs "High Grade"	0.151	0.0015	0.00278	0.9459
S100A13_AP_7731	S100A13	ENSG00000189171	chr1 | -	AP	NA	NA	6	BLCA	neoplasm_histologic_grade	"Low Grade" vs "High Grade"	-0.1423	0.000358	0.00097	1
S100A13_AP_7733	S100A13	ENSG00000189171	chr1 | -	AP	NA	NA	4	BLCA	neoplasm_histologic_grade	"Low Grade" vs "High Grade"	0.1287	4.37e-06	4.1e-05	1
S1PR3_AP_86790	S1PR3	ENSG00000213694	chr9 | +	AP	NA	NA	1	BLCA	neoplasm_histologic_grade	"Low Grade" vs "High Grade"	-0.3382	1.78e-05	0.000113	1
S1PR3_AP_86791	S1PR3	ENSG00000213694	chr9 | +	AP	NA	NA	2.1	BLCA	neoplasm_histologic_grade	"Low Grade" vs "High Grade"	0.3382	1.78e-05	0.000113	1
SAA2_AT_14577	SAA2	ENSG00000134339	chr11 | -	AT	NA	NA	5	BLCA	neoplasm_histologic_grade	"Low Grade" vs "High Grade"	0.2858	0.019	0.022	0.9976
SAA2_AT_14580	SAA2	ENSG00000134339	chr11 | -	AT	NA	NA	4	BLCA	neoplasm_histologic_grade	"Low Grade" vs "High Grade"	-0.2216	0.028	0.032	0.9976
SAMD4B_AT_49801	SAMD4B	ENSG00000179134	chr19 | +	AT	NA	NA	17	BLCA	neoplasm_histologic_grade	"Low Grade" vs "High Grade"	0.1138	0.026	0.03	1
SAMD4B_AT_49802	SAMD4B	ENSG00000179134	chr19 | +	AT	NA	NA	16.2	BLCA	neoplasm_histologic_grade	"Low Grade" vs "High Grade"	-0.1138	0.026	0.03	1
SAR1B_AP_73412	SAR1B	ENSG00000152700	chr5 | -	AP	NA	NA	7.1	BLCA	neoplasm_histologic_grade	"Low Grade" vs "High Grade"	0.3392	6.77e-06	5.74e-05	1
SAR1B_AP_73415	SAR1B	ENSG00000152700	chr5 | -	AP	NA	NA	2	BLCA	neoplasm_histologic_grade	"Low Grade" vs "High Grade"	-0.2167	5.34e-06	4.78e-05	1
SAR1B_ES_73418	SAR1B	ENSG00000152700	chr5 | -	ES	5.2	8	6	BLCA	neoplasm_histologic_grade	"Low Grade" vs "High Grade"	0.1728	0.000189	0.000611	0.9976
SCAF11_AP_21313	SCAF11	ENSG00000139218	chr12 | -	AP	NA	NA	14.1	BLCA	neoplasm_histologic_grade	"Low Grade" vs "High Grade"	0.1973	0.000953	0.00199	1
SCAF11_AP_21316	SCAF11	ENSG00000139218	chr12 | -	AP	NA	NA	2	BLCA	neoplasm_histologic_grade	"Low Grade" vs "High Grade"	-0.2718	0.00357	0.00556	1
SCD5_AT_69715	SCD5	ENSG00000145284	chr4 | -	AT	NA	NA	6	BLCA	neoplasm_histologic_grade	"Low Grade" vs "High Grade"	0.131	0.000208	0.000655	1
SCD5_AT_69716	SCD5	ENSG00000145284	chr4 | -	AT	NA	NA	8	BLCA	neoplasm_histologic_grade	"Low Grade" vs "High Grade"	-0.2203	0.000246	0.000741	1
SCIMP_AT_38666	SCIMP	ENSG00000161929	chr17 | -	AT	NA	NA	5	BLCA	neoplasm_histologic_grade	"Low Grade" vs "High Grade"	0.1745	4.97e-06	4.51e-05	1
SCIMP_AT_38667	SCIMP	ENSG00000161929	chr17 | -	AT	NA	NA	6	BLCA	neoplasm_histologic_grade	"Low Grade" vs "High Grade"	-0.1745	4.97e-06	4.51e-05	1
SCLT1_AT_70588	SCLT1	ENSG00000151466	chr4 | -	AT	NA	NA	5	BLCA	neoplasm_histologic_grade	"Low Grade" vs "High Grade"	-0.1552	8.56e-08	3.14e-06	1
SCLT1_AT_70589	SCLT1	ENSG00000151466	chr4 | -	AT	NA	NA	23	BLCA	neoplasm_histologic_grade	"Low Grade" vs "High Grade"	0.159	9.3e-07	1.43e-05	1
SCO2_AP_62846	SCO2	ENSG00000130489	chr22 | -	AP	NA	NA	3.1	BLCA	neoplasm_histologic_grade	"Low Grade" vs "High Grade"	0.1205	0.00735	0.01	1
SDR39U1_AP_27005	SDR39U1	ENSG00000100445	chr14 | -	AP	NA	NA	3.1	BLCA	neoplasm_histologic_grade	"Low Grade" vs "High Grade"	0.1115	0.00529	0.00764	1
SEC14L1_AP_43701	SEC14L1	ENSG00000129657	chr17 | +	AP	NA	NA	4.1	BLCA	neoplasm_histologic_grade	"Low Grade" vs "High Grade"	-0.1823	3.76e-05	0.000187	1
SEC22A_AP_66461	SEC22A	ENSG00000121542	chr3 | +	AP	NA	NA	1	BLCA	neoplasm_histologic_grade	"Low Grade" vs "High Grade"	-0.1336	0.000896	0.00192	1
SEC22A_AP_66462	SEC22A	ENSG00000121542	chr3 | +	AP	NA	NA	2.1	BLCA	neoplasm_histologic_grade	"Low Grade" vs "High Grade"	0.1336	0.000896	0.00192	1
SEC23A_AP_27345	SEC23A	ENSG00000100934	chr14 | -	AP	NA	NA	7	BLCA	neoplasm_histologic_grade	"Low Grade" vs "High Grade"	0.2522	0.00203	0.00353	1
SEC23A_AP_27346	SEC23A	ENSG00000100934	chr14 | -	AP	NA	NA	1	BLCA	neoplasm_histologic_grade	"Low Grade" vs "High Grade"	-0.2522	0.00204	0.00354	1
SEC23A_AT_27347	SEC23A	ENSG00000100934	chr14 | -	AT	NA	NA	23	BLCA	neoplasm_histologic_grade	"Low Grade" vs "High Grade"	-0.1428	5.04e-07	1.12e-05	1
SEC23A_AT_27348	SEC23A	ENSG00000100934	chr14 | -	AT	NA	NA	4.2	BLCA	neoplasm_histologic_grade	"Low Grade" vs "High Grade"	0.1428	4.89e-07	1.1e-05	1
SEC31A_AD_69735	SEC31A	ENSG00000138674	chr4 | -	AD	10.1	11	10.2	BLCA	neoplasm_histologic_grade	"Low Grade" vs "High Grade"	0.2435	0.000134	0.000478	1
SEMA6A_AP_73055	SEMA6A	ENSG00000092421	chr5 | -	AP	NA	NA	1	BLCA	neoplasm_histologic_grade	"Low Grade" vs "High Grade"	-0.1788	0.00171	0.00309	0.8541
SEMA6A_AP_73057	SEMA6A	ENSG00000092421	chr5 | -	AP	NA	NA	20.1	BLCA	neoplasm_histologic_grade	"Low Grade" vs "High Grade"	0.1747	0.000293	0.00083	0.8541
SEPT6_AT_89963	2023-09-06	ENSG00000125354	chrX | -	AT	NA	NA	14	BLCA	neoplasm_histologic_grade	"Low Grade" vs "High Grade"	0.1011	0.00629	0.00882	1
SEPT6_AT_89964	2023-09-06	ENSG00000125354	chrX | -	AT	NA	NA	13.3	BLCA	neoplasm_histologic_grade	"Low Grade" vs "High Grade"	-0.1244	0.000447	0.00113	1
SEPT6_ES_89975	2023-09-06	ENSG00000125354	chrX | -	ES	11.1	13.2	00:12:13.100000	BLCA	neoplasm_histologic_grade	"Low Grade" vs "High Grade"	0.1162	0.00274	0.00442	0.9694
SEPT9_AP_43716	2023-09-09	ENSG00000184640	chr17 | +	AP	NA	NA	1	BLCA	neoplasm_histologic_grade	"Low Grade" vs "High Grade"	0.1256	0.019	0.023	0.9976
SERINC5_AT_72644	SERINC5	ENSG00000164300	chr5 | -	AT	NA	NA	16	BLCA	neoplasm_histologic_grade	"Low Grade" vs "High Grade"	0.3874	0.013	0.016	1
SERINC5_AT_72645	SERINC5	ENSG00000164300	chr5 | -	AT	NA	NA	12	BLCA	neoplasm_histologic_grade	"Low Grade" vs "High Grade"	-0.3874	0.013	0.016	1
SERPINE3_AT_25931	SERPINE3	ENSG00000253309	chr13 | +	AT	NA	NA	10.2	BLCA	neoplasm_histologic_grade	"Low Grade" vs "High Grade"	0.2462	0.000363	0.000979	0.9976
SERPINE3_AT_25932	SERPINE3	ENSG00000253309	chr13 | +	AT	NA	NA	11	BLCA	neoplasm_histologic_grade	"Low Grade" vs "High Grade"	-0.2462	0.000363	0.000979	0.9976
SERPINF1_AA_38372	SERPINF1	ENSG00000132386	chr17 | +	AA	3	4.2	4.1	BLCA	neoplasm_histologic_grade	"Low Grade" vs "High Grade"	0.34	2.51e-09	3.98e-07	0.9788
SETD6_AA_36663	SETD6	ENSG00000103037	chr16 | +	AA	5	6.2	6.1	BLCA	neoplasm_histologic_grade	"Low Grade" vs "High Grade"	0.1126	0.019	0.022	0.9576
SH2B1_RI_35876	SH2B1	ENSG00000178188	chr16 | +	RI	3.3	3.6	3.4:3.5	BLCA	neoplasm_histologic_grade	"Low Grade" vs "High Grade"	0.1068	0.0037	0.0057	0.9929
SH2B1_RI_35882	SH2B1	ENSG00000178188	chr16 | +	RI	3.2	3.6	3.3:3.4:3.5	BLCA	neoplasm_histologic_grade	"Low Grade" vs "High Grade"	0.1026	0.00183	0.00325	0.9929
SH3BP1_AT_62132	SH3BP1	ENSG00000100092	chr22 | +	AT	NA	NA	21	BLCA	neoplasm_histologic_grade	"Low Grade" vs "High Grade"	-0.1939	2.93e-10	9.91e-08	1
SH3BP1_AT_62134	SH3BP1	ENSG00000100092	chr22 | +	AT	NA	NA	20.3	BLCA	neoplasm_histologic_grade	"Low Grade" vs "High Grade"	0.1939	2.9e-10	9.91e-08	1
SH3GLB2_ES_87814	SH3GLB2	ENSG00000148341	chr9 | -	ES	1	5	02:03:04	BLCA	neoplasm_histologic_grade	"Low Grade" vs "High Grade"	0.1321	0.00247	0.00407	0.8894
SH3RF2_AT_73901	SH3RF2	ENSG00000156463	chr5 | +	AT	NA	NA	11	BLCA	neoplasm_histologic_grade	"Low Grade" vs "High Grade"	-0.1074	0.022	0.026	1
SH3RF2_AT_73902	SH3RF2	ENSG00000156463	chr5 | +	AT	NA	NA	10.2	BLCA	neoplasm_histologic_grade	"Low Grade" vs "High Grade"	0.1074	0.022	0.026	1
SIAH1_AP_36339	SIAH1	ENSG00000196470	chr16 | -	AP	NA	NA	8.1	BLCA	neoplasm_histologic_grade	"Low Grade" vs "High Grade"	0.2814	0.00171	0.00309	1
SIAH1_AP_36340	SIAH1	ENSG00000196470	chr16 | -	AP	NA	NA	6	BLCA	neoplasm_histologic_grade	"Low Grade" vs "High Grade"	-0.173	0.021	0.025	1
SIDT2_RI_18886	SIDT2	ENSG00000149577	chr11 | +	RI	25.1	25.3	25.2	BLCA	neoplasm_histologic_grade	"Low Grade" vs "High Grade"	0.2966	3.17e-05	0.000166	0.9976
SIGIRR_AP_13650	SIGIRR	ENSG00000185187	chr11 | -	AP	NA	NA	2	BLCA	neoplasm_histologic_grade	"Low Grade" vs "High Grade"	-0.1012	0.00599	0.00851	0.9906
SIGIRR_AP_13651	SIGIRR	ENSG00000185187	chr11 | -	AP	NA	NA	1.1	BLCA	neoplasm_histologic_grade	"Low Grade" vs "High Grade"	0.1012	0.00599	0.00851	0.9906
SIRT2_AA_49713	SIRT2	ENSG00000068903	chr19 | -	AA	2	3.2	3.1	BLCA	neoplasm_histologic_grade	"Low Grade" vs "High Grade"	0.2288	8.29e-05	0.000327	0.9506
SIRT2_ES_49711	SIRT2	ENSG00000068903	chr19 | -	ES	4	7	6	BLCA	neoplasm_histologic_grade	"Low Grade" vs "High Grade"	0.1232	0.00132	0.00252	1
SIRT2_ES_49714	SIRT2	ENSG00000068903	chr19 | -	ES	1	3.2	00:02:03.100000	BLCA	neoplasm_histologic_grade	"Low Grade" vs "High Grade"	0.1132	0.000389	0.00103	0.9929
SLC11A2_AT_21729	SLC11A2	ENSG00000110911	chr12 | -	AT	NA	NA	23.3	BLCA	neoplasm_histologic_grade	"Low Grade" vs "High Grade"	0.2716	3.07e-08	1.48e-06	1
SLC11A2_AT_21730	SLC11A2	ENSG00000110911	chr12 | -	AT	NA	NA	22.2	BLCA	neoplasm_histologic_grade	"Low Grade" vs "High Grade"	-0.2716	3.07e-08	1.48e-06	1
SLC13A3_AT_59695	SLC13A3	ENSG00000158296	chr20 | -	AT	NA	NA	16	BLCA	neoplasm_histologic_grade	"Low Grade" vs "High Grade"	-0.1319	0.024	0.028	0.9694
SLC13A3_AT_59696	SLC13A3	ENSG00000158296	chr20 | -	AT	NA	NA	5	BLCA	neoplasm_histologic_grade	"Low Grade" vs "High Grade"	0.1338	0.044	0.048	0.9694
SLC16A1_AT_4265	SLC16A1	ENSG00000155380	chr1 | -	AT	NA	NA	5.2	BLCA	neoplasm_histologic_grade	"Low Grade" vs "High Grade"	0.486	7.01e-09	5.64e-07	1
SLC16A1_AT_4266	SLC16A1	ENSG00000155380	chr1 | -	AT	NA	NA	6	BLCA	neoplasm_histologic_grade	"Low Grade" vs "High Grade"	-0.486	7.01e-09	5.64e-07	1
SLC23A3_AT_57594	SLC23A3	ENSG00000213901	chr2 | -	AT	NA	NA	12.2	BLCA	neoplasm_histologic_grade	"Low Grade" vs "High Grade"	0.1074	0.000766	0.00171	1
SLC23A3_AT_57595	SLC23A3	ENSG00000213901	chr2 | -	AT	NA	NA	19	BLCA	neoplasm_histologic_grade	"Low Grade" vs "High Grade"	-0.1053	0.000794	0.00176	1
SLC25A14_RI_90098	SLC25A14	ENSG00000102078	chrX | +	RI	9.1	9.3	9.2	BLCA	neoplasm_histologic_grade	"Low Grade" vs "High Grade"	0.1437	0.00425	0.00636	0.9953
SLC25A19_AP_43428	SLC25A19	ENSG00000125454	chr17 | -	AP	NA	NA	1	BLCA	neoplasm_histologic_grade	"Low Grade" vs "High Grade"	-0.1874	9.74e-06	7.31e-05	0.9976
SLC25A19_AP_43430	SLC25A19	ENSG00000125454	chr17 | -	AP	NA	NA	4.1	BLCA	neoplasm_histologic_grade	"Low Grade" vs "High Grade"	0.1874	9.74e-06	7.31e-05	0.9976
SLC25A19_ES_43433	SLC25A19	ENSG00000125454	chr17 | -	ES	1	4.2	3	BLCA	neoplasm_histologic_grade	"Low Grade" vs "High Grade"	0.1393	0.000127	0.000461	0.9553
SLC25A29_AA_29256	SLC25A29	ENSG00000197119	chr14 | -	AA	2	3.7	3.2:3.3:3.4:3.5:3.6	BLCA	neoplasm_histologic_grade	"Low Grade" vs "High Grade"	0.1344	0.038	0.043	0.9671
SLC25A45_AP_16821	SLC25A45	ENSG00000162241	chr11 | -	AP	NA	NA	1	BLCA	neoplasm_histologic_grade	"Low Grade" vs "High Grade"	0.123	0.00222	0.00378	0.9976
SLC25A46_AP_72944	SLC25A46	ENSG00000164209	chr5 | +	AP	NA	NA	2	BLCA	neoplasm_histologic_grade	"Low Grade" vs "High Grade"	-0.2106	0.000159	0.000533	0.9812
SLC30A5_AA_72303	SLC30A5	ENSG00000145740	chr5 | +	AA	3	4.2	4.1	BLCA	neoplasm_histologic_grade	"Low Grade" vs "High Grade"	0.2197	0.00394	0.00601	1
SLC35A5_AP_66109	SLC35A5	ENSG00000138459	chr3 | +	AP	NA	NA	1	BLCA	neoplasm_histologic_grade	"Low Grade" vs "High Grade"	-0.1848	0.000706	0.0016	0.9694
SLC35A5_AP_66110	SLC35A5	ENSG00000138459	chr3 | +	AP	NA	NA	3	BLCA	neoplasm_histologic_grade	"Low Grade" vs "High Grade"	0.1848	0.000706	0.0016	0.9694
SLC37A3_AA_81987	SLC37A3	ENSG00000157800	chr7 | -	AA	9	10.2	10.1	BLCA	neoplasm_histologic_grade	"Low Grade" vs "High Grade"	0.2266	0.000173	0.000567	0.9482
SLC37A3_ES_81991	SLC37A3	ENSG00000157800	chr7 | -	ES	3	5	4	BLCA	neoplasm_histologic_grade	"Low Grade" vs "High Grade"	0.3432	1.72e-05	0.00011	0.9718
SLC4A11_AP_58580	SLC4A11	ENSG00000088836	chr20 | -	AP	NA	NA	1.1	BLCA	neoplasm_histologic_grade	"Low Grade" vs "High Grade"	-0.1264	0.00257	0.0042	0.8612
SLC4A8_AT_21855	SLC4A8	ENSG00000050438	chr12 | +	AT	NA	NA	20	BLCA	neoplasm_histologic_grade	"Low Grade" vs "High Grade"	0.2561	6.32e-07	1.24e-05	0.9929
SLC4A8_AT_21857	SLC4A8	ENSG00000050438	chr12 | +	AT	NA	NA	18.2	BLCA	neoplasm_histologic_grade	"Low Grade" vs "High Grade"	-0.1328	0.000426	0.00109	0.9929
SLC52A2_AD_85580	SLC52A2	ENSG00000185803	chr8 | +	AD	1.1	2.2	1.2:1.3:1.4	BLCA	neoplasm_histologic_grade	"Low Grade" vs "High Grade"	0.1274	0.0015	0.00278	0.9765
SLC6A8_AP_90462	SLC6A8	ENSG00000130821	chrX | +	AP	NA	NA	1	BLCA	neoplasm_histologic_grade	"Low Grade" vs "High Grade"	-0.1621	0.00116	0.00229	0.96
SLC6A8_AP_90463	SLC6A8	ENSG00000130821	chrX | +	AP	NA	NA	2	BLCA	neoplasm_histologic_grade	"Low Grade" vs "High Grade"	0.1621	0.00116	0.00229	0.96
SLC7A6_ES_37213	SLC7A6	ENSG00000103064	chr16 | +	ES	2.2	4	3	BLCA	neoplasm_histologic_grade	"Low Grade" vs "High Grade"	0.1592	0.000196	0.000631	0.9953
SLC8B1_AP_24634	SLC8B1	ENSG00000089060	chr12 | -	AP	NA	NA	1	BLCA	neoplasm_histologic_grade	"Low Grade" vs "High Grade"	-0.1429	0.03	0.034	1
SLC9B2_AP_70167	SLC9B2	ENSG00000164038	chr4 | -	AP	NA	NA	1	BLCA	neoplasm_histologic_grade	"Low Grade" vs "High Grade"	0.1605	7.25e-07	1.33e-05	0.9859
SLC9B2_AP_70169	SLC9B2	ENSG00000164038	chr4 | -	AP	NA	NA	6	BLCA	neoplasm_histologic_grade	"Low Grade" vs "High Grade"	-0.1373	1.27e-06	1.69e-05	0.9859
SLMAP_ES_65394	SLMAP	ENSG00000163681	chr3 | +	ES	24	26	25	BLCA	neoplasm_histologic_grade	"Low Grade" vs "High Grade"	-0.27	2.14e-05	0.000128	0.9929
SMARCD3_RI_82363	SMARCD3	ENSG00000082014	chr7 | -	RI	11.1	11.3	11.2	BLCA	neoplasm_histologic_grade	"Low Grade" vs "High Grade"	0.1218	0.00223	0.00378	0.9976
SMIM4_AT_65229	SMIM4	ENSG00000168273	chr3 | +	AT	NA	NA	2	BLCA	neoplasm_histologic_grade	"Low Grade" vs "High Grade"	0.218	0.00763	0.01	1
SMIM4_AT_65230	SMIM4	ENSG00000168273	chr3 | +	AT	NA	NA	3	BLCA	neoplasm_histologic_grade	"Low Grade" vs "High Grade"	-0.218	0.00763	0.01	1
SMPD4_ES_55293	SMPD4	ENSG00000136699	chr2 | -	ES	11	14	12	BLCA	neoplasm_histologic_grade	"Low Grade" vs "High Grade"	0.1455	0.00772	0.01	0.9671
SMPD4_ES_55299	SMPD4	ENSG00000136699	chr2 | -	ES	10	14	11:12:00	BLCA	neoplasm_histologic_grade	"Low Grade" vs "High Grade"	0.1039	0.00942	0.012	0.9647
SNRNP70_AD_50885	SNRNP70	ENSG00000104852	chr19 | +	AD	8.1	9	8.2	BLCA	neoplasm_histologic_grade	"Low Grade" vs "High Grade"	0.1978	5.94e-06	5.22e-05	0.9835
SNRNP70_ES_50886	SNRNP70	ENSG00000104852	chr19 | +	ES	7	9	8.1:8.2:8.3	BLCA	neoplasm_histologic_grade	"Low Grade" vs "High Grade"	0.1463	0.0041	0.00619	1
SNX11_ES_42174	SNX11	ENSG00000002919	chr17 | +	ES	4	6	5	BLCA	neoplasm_histologic_grade	"Low Grade" vs "High Grade"	0.1745	0.000418	0.00108	1
SON_ES_60438	SON	ENSG00000159140	chr21 | +	ES	10	12	11	BLCA	neoplasm_histologic_grade	"Low Grade" vs "High Grade"	0.1155	0.000795	0.00176	0.9929
SP140L_RI_57890	SP140L	ENSG00000185404	chr2 | +	RI	16.1	16.3	16.2	BLCA	neoplasm_histologic_grade	"Low Grade" vs "High Grade"	0.1353	0.00208	0.00359	0.9671
SPAG9_ES_42494	SPAG9	ENSG00000008294	chr17 | -	ES	29	31	30	BLCA	neoplasm_histologic_grade	"Low Grade" vs "High Grade"	-0.1138	0.000205	0.000648	0.9859
SPATA6L_AT_85752	SPATA6L	ENSG00000106686	chr9 | -	AT	NA	NA	19	BLCA	neoplasm_histologic_grade	"Low Grade" vs "High Grade"	-0.1596	0.000217	0.000672	0.9976
SPATA6L_AT_85753	SPATA6L	ENSG00000106686	chr9 | -	AT	NA	NA	16.2	BLCA	neoplasm_histologic_grade	"Low Grade" vs "High Grade"	0.1642	0.000178	0.00058	0.9976
SPG21_AP_31148	SPG21	ENSG00000090487	chr15 | -	AP	NA	NA	1	BLCA	neoplasm_histologic_grade	"Low Grade" vs "High Grade"	-0.1448	0.00667	0.00927	1
SPG21_AP_31149	SPG21	ENSG00000090487	chr15 | -	AP	NA	NA	4.1	BLCA	neoplasm_histologic_grade	"Low Grade" vs "High Grade"	0.1581	0.00532	0.00766	1
SPIN1_ES_86785	SPIN1	ENSG00000106723	chr9 | +	ES	1	5	02:03:04	BLCA	neoplasm_histologic_grade	"Low Grade" vs "High Grade"	0.1882	0.00215	0.00369	0.9906
SPIN3_AT_89291	SPIN3	ENSG00000204271	chrX | -	AT	NA	NA	5	BLCA	neoplasm_histologic_grade	"Low Grade" vs "High Grade"	0.1612	0.00415	0.00625	0.9976
SPIN3_AT_89292	SPIN3	ENSG00000204271	chrX | -	AT	NA	NA	2.2	BLCA	neoplasm_histologic_grade	"Low Grade" vs "High Grade"	-0.1612	0.00415	0.00625	0.9976
SPOP_AP_42302	SPOP	ENSG00000121067	chr17 | -	AP	NA	NA	1	BLCA	neoplasm_histologic_grade	"Low Grade" vs "High Grade"	-0.2511	0.00141	0.00265	1
SPOP_AP_42303	SPOP	ENSG00000121067	chr17 | -	AP	NA	NA	4	BLCA	neoplasm_histologic_grade	"Low Grade" vs "High Grade"	0.2511	0.00141	0.00265	1
SRC_AP_59347	SRC	ENSG00000197122	chr20 | +	AP	NA	NA	1	BLCA	neoplasm_histologic_grade	"Low Grade" vs "High Grade"	0.1092	0.00202	0.00353	0.9765
SRC_AP_59349	SRC	ENSG00000197122	chr20 | +	AP	NA	NA	2	BLCA	neoplasm_histologic_grade	"Low Grade" vs "High Grade"	-0.1092	0.00209	0.0036	0.9765
SREBF1_AP_39500	SREBF1	ENSG00000072310	chr17 | -	AP	NA	NA	1	BLCA	neoplasm_histologic_grade	"Low Grade" vs "High Grade"	-0.1635	0.0045	0.00668	0.9694
SREBF1_AP_39501	SREBF1	ENSG00000072310	chr17 | -	AP	NA	NA	3.1	BLCA	neoplasm_histologic_grade	"Low Grade" vs "High Grade"	0.1646	0.00417	0.00627	0.9694
SRGAP1_AP_22854	SRGAP1	ENSG00000196935	chr12 | +	AP	NA	NA	2.1	BLCA	neoplasm_histologic_grade	"Low Grade" vs "High Grade"	0.2978	5.48e-07	1.13e-05	0.9953
SRGAP1_AP_22855	SRGAP1	ENSG00000196935	chr12 | +	AP	NA	NA	1	BLCA	neoplasm_histologic_grade	"Low Grade" vs "High Grade"	-0.2978	5.48e-07	1.13e-05	0.9953
SRSF1_RI_42632	SRSF1	ENSG00000136450	chr17 | -	RI	3.1	3.3	3.2	BLCA	neoplasm_histologic_grade	"Low Grade" vs "High Grade"	0.1563	3.62e-05	0.000181	1
SRSF11_ES_3387	SRSF11	ENSG00000116754	chr1 | +	ES	4.2	6.5	5:6.1:6.2:6.3:6.4	BLCA	neoplasm_histologic_grade	"Low Grade" vs "High Grade"	0.1584	0.00201	0.00352	0.9741
SRSF2_RI_43663	SRSF2	ENSG00000161547	chr17 | -	RI	2.1	2.5	2.2:2.3:2.4	BLCA	neoplasm_histologic_grade	"Low Grade" vs "High Grade"	0.111	0.00986	0.013	1
SRSF4_ES_1425	SRSF4	ENSG00000116350	chr1 | -	ES	1	5	02:03:04	BLCA	neoplasm_histologic_grade	"Low Grade" vs "High Grade"	0.1472	4.77e-05	0.000222	0.9929
SRSF6_ES_59434	SRSF6	ENSG00000124193	chr20 | +	ES	2	4	3	BLCA	neoplasm_histologic_grade	"Low Grade" vs "High Grade"	0.1648	0.0044	0.00654	1
SRSF7_AA_53281	SRSF7	ENSG00000115875	chr2 | -	AA	4.1	4.6	4.3:4.4:4.5	BLCA	neoplasm_histologic_grade	"Low Grade" vs "High Grade"	0.1069	0.000107	0.000403	1
SRSF7_RI_53279	SRSF7	ENSG00000115875	chr2 | -	RI	4.1	4.3	4.2	BLCA	neoplasm_histologic_grade	"Low Grade" vs "High Grade"	0.1608	0.000939	0.00197	0.9929
SRSF7_RI_53280	SRSF7	ENSG00000115875	chr2 | -	RI	4.1	4.6	4.2:4.3:4.4:4.5	BLCA	neoplasm_histologic_grade	"Low Grade" vs "High Grade"	0.1315	6.34e-05	0.00027	1
SS18_ES_44966	SS18	ENSG00000141380	chr18 | -	ES	3	9	6	BLCA	neoplasm_histologic_grade	"Low Grade" vs "High Grade"	0.1341	0.00259	0.00425	0.9671
SSBP4_AP_48426	SSBP4	ENSG00000130511	chr19 | +	AP	NA	NA	1	BLCA	neoplasm_histologic_grade	"Low Grade" vs "High Grade"	-0.1951	0.00065	0.0015	1
SSBP4_AP_48427	SSBP4	ENSG00000130511	chr19 | +	AP	NA	NA	17.1	BLCA	neoplasm_histologic_grade	"Low Grade" vs "High Grade"	0.1951	0.00065	0.0015	1
ST3GAL4_AP_19391	ST3GAL4	ENSG00000110080	chr11 | +	AP	NA	NA	1	BLCA	neoplasm_histologic_grade	"Low Grade" vs "High Grade"	-0.3129	8.02e-07	1.37e-05	0.9929
ST3GAL4_AP_19394	ST3GAL4	ENSG00000110080	chr11 | +	AP	NA	NA	2	BLCA	neoplasm_histologic_grade	"Low Grade" vs "High Grade"	-0.1355	4.32e-08	1.97e-06	0.9929
ST3GAL4_AP_19395	ST3GAL4	ENSG00000110080	chr11 | +	AP	NA	NA	5.1	BLCA	neoplasm_histologic_grade	"Low Grade" vs "High Grade"	0.5318	2.08e-09	3.91e-07	0.9929
ST6GAL2_AT_54866	ST6GAL2	ENSG00000144057	chr2 | -	AT	NA	NA	8	BLCA	neoplasm_histologic_grade	"Low Grade" vs "High Grade"	-0.2025	0.028	0.032	1
ST6GAL2_AT_54867	ST6GAL2	ENSG00000144057	chr2 | -	AT	NA	NA	7	BLCA	neoplasm_histologic_grade	"Low Grade" vs "High Grade"	0.2025	0.028	0.032	1
ST7_ES_81563	ST7	ENSG00000004866	chr7 | +	ES	9	11.1	10	BLCA	neoplasm_histologic_grade	"Low Grade" vs "High Grade"	-0.1791	0.0027	0.00437	0.9788
ST8SIA1_AT_20726	ST8SIA1	ENSG00000111728	chr12 | -	AT	NA	NA	7	BLCA	neoplasm_histologic_grade	"Low Grade" vs "High Grade"	0.2291	1.14e-06	1.63e-05	1
ST8SIA1_AT_20727	ST8SIA1	ENSG00000111728	chr12 | -	AT	NA	NA	3	BLCA	neoplasm_histologic_grade	"Low Grade" vs "High Grade"	-0.2291	1.14e-06	1.63e-05	1
STAMBP_AT_53987	STAMBP	ENSG00000124356	chr2 | +	AT	NA	NA	11.2	BLCA	neoplasm_histologic_grade	"Low Grade" vs "High Grade"	-0.1525	2.49e-06	2.86e-05	1
STAMBP_AT_53988	STAMBP	ENSG00000124356	chr2 | +	AT	NA	NA	12	BLCA	neoplasm_histologic_grade	"Low Grade" vs "High Grade"	0.1525	2.49e-06	2.86e-05	1
STAU1_ES_59743	STAU1	ENSG00000124214	chr20 | -	ES	1	3	2	BLCA	neoplasm_histologic_grade	"Low Grade" vs "High Grade"	0.1168	0.03	0.034	1
STEAP4_AT_80361	STEAP4	ENSG00000127954	chr7 | -	AT	NA	NA	6	BLCA	neoplasm_histologic_grade	"Low Grade" vs "High Grade"	-0.197	2.02e-05	0.000124	1
STEAP4_AT_80362	STEAP4	ENSG00000127954	chr7 | -	AT	NA	NA	4.2	BLCA	neoplasm_histologic_grade	"Low Grade" vs "High Grade"	0.197	2.03e-05	0.000124	1
STRA13_ES_44265	STRA13	ENSG00000169689	chr17 | -	ES	2	4.1	3.1:3.2	BLCA	neoplasm_histologic_grade	"Low Grade" vs "High Grade"	0.1088	0.000637	0.00148	1
STRA13_ES_44266	STRA13	ENSG00000169689	chr17 | -	ES	2	4.1	3.1	BLCA	neoplasm_histologic_grade	"Low Grade" vs "High Grade"	0.1307	0.000269	0.00079	1
STRA6_AD_31688	STRA6	ENSG00000137868	chr15 | -	AD	18.1	19	18.2	BLCA	neoplasm_histologic_grade	"Low Grade" vs "High Grade"	0.3375	3.04e-05	0.000161	1
STRA6_AT_31685	STRA6	ENSG00000137868	chr15 | -	AT	NA	NA	23	BLCA	neoplasm_histologic_grade	"Low Grade" vs "High Grade"	-0.1375	1.08e-05	7.72e-05	0.9859
STRA6_AT_31687	STRA6	ENSG00000137868	chr15 | -	AT	NA	NA	11.4	BLCA	neoplasm_histologic_grade	"Low Grade" vs "High Grade"	0.1313	6.1e-05	0.000263	0.9859
STXBP2_AP_47122	STXBP2	ENSG00000076944	chr19 | +	AP	NA	NA	1	BLCA	neoplasm_histologic_grade	"Low Grade" vs "High Grade"	-0.1356	0.000761	0.00171	0.9953
STXBP2_AP_47123	STXBP2	ENSG00000076944	chr19 | +	AP	NA	NA	17.1	BLCA	neoplasm_histologic_grade	"Low Grade" vs "High Grade"	0.1356	0.000761	0.00171	0.9953
SUCLA2_AP_25849	SUCLA2	ENSG00000136143	chr13 | -	AP	NA	NA	1	BLCA	neoplasm_histologic_grade	"Low Grade" vs "High Grade"	0.1911	0.00162	0.00296	0.9976
SUCLA2_AP_25850	SUCLA2	ENSG00000136143	chr13 | -	AP	NA	NA	3	BLCA	neoplasm_histologic_grade	"Low Grade" vs "High Grade"	-0.1892	0.00177	0.00316	0.9976
SULF2_ES_59728	SULF2	ENSG00000196562	chr20 | -	ES	19.2	21	20	BLCA	neoplasm_histologic_grade	"Low Grade" vs "High Grade"	-0.1782	0.012	0.015	0.9882
SULT1A2_AA_35758	SULT1A2	ENSG00000197165	chr16 | -	AA	4	5.2	5.1	BLCA	neoplasm_histologic_grade	"Low Grade" vs "High Grade"	0.124	0.00528	0.00764	0.9341
SULT1A2_RI_35811	SULT1A2	ENSG00000197165	chr16 | -	RI	1.1	1.4	1.2:1.3	BLCA	neoplasm_histologic_grade	"Low Grade" vs "High Grade"	-0.2593	0.00141	0.00265	0.9624
SULT2B1_AP_50773	SULT2B1	ENSG00000088002	chr19 | +	AP	NA	NA	1	BLCA	neoplasm_histologic_grade	"Low Grade" vs "High Grade"	-0.2109	0.00629	0.00882	0.9976
SULT2B1_AP_50774	SULT2B1	ENSG00000088002	chr19 | +	AP	NA	NA	2.1	BLCA	neoplasm_histologic_grade	"Low Grade" vs "High Grade"	0.2109	0.00629	0.00882	0.9976
SUOX_AP_22333	SUOX	ENSG00000139531	chr12 | +	AP	NA	NA	5.1	BLCA	neoplasm_histologic_grade	"Low Grade" vs "High Grade"	0.1196	0.025	0.029	0.9812
SUOX_AP_22334	SUOX	ENSG00000139531	chr12 | +	AP	NA	NA	1	BLCA	neoplasm_histologic_grade	"Low Grade" vs "High Grade"	-0.1196	0.025	0.029	0.9812
SUOX_ES_22342	SUOX	ENSG00000139531	chr12 | +	ES	1	5.2	4	BLCA	neoplasm_histologic_grade	"Low Grade" vs "High Grade"	0.1106	0.033	0.038	0.96
SUPT7L_RI_53041	SUPT7L	ENSG00000119760	chr2 | -	RI	2.1	2.4	2.2:2.3	BLCA	neoplasm_histologic_grade	"Low Grade" vs "High Grade"	0.1398	0.00359	0.00558	0.9929
[truncated: 34,547 more rows]
