# Supplementary material for: Identification of alternative splicing associated with clinical features: from pan-cancers to genitourinary tumors
Source: Front Oncol. 2023 Sep 25;13:1249932. doi: 10.3389/fonc.2023.1249932 (PMC10557043; doi:10.3389/fonc.2023.1249932)
Supplement: Supplementary file 6 [file Table_3.xlsx]

## Sheet: tableS3_race_related_ases_wb_wa
Supplemental table S3. Race-related alternative splicing events in WB comparison and WA comparison
Splice_Event	nCancerOfWB	nCancerOfWA	Types
RSU1_AD_10878	13	5	Comon ASEs in WB (White vs African Americans) and WA (White vs Asian Americans)
MRPL36_AD_71493	12	5
NDUFS5_AD_1869	12	5
PSPH_RI_79777	12	5
MRPL43_AD_12856	6	5
SLC3A2_ES_16474	10	4
XRCC4_AA_72698	10	4
ULK3_AD_31756	13	3
BANF1_AD_16981	9	3
C14orf159_AD_28848	9	3
RPS9_AD_51827	9	3
RPGRIP1L_ES_36425	6	3
AURKA_ES_59846	5	3
ARL6IP4_AA_25028	12	NA	WB specific
PSMG4_RI_75176	11	NA
SLC25A26_ES_65549	11	NA
NMRAL1_AD_33740	10	NA
PSMG4_ES_75183	10	NA
ARL6IP4_ES_25030	9	NA
AURKAIP1_RI_147	9	NA
WARS_ES_29291	9	NA
FAM118A_AP_62657	8	NA
FAM86B1_AD_82683	8	NA
NEK3_ES_25993	8	NA
RNF212_AT_68449	8	NA
C14orf80_ES_29662	7	NA
UBE2I_AD_33059	7	NA
ZNF85_AT_48734	7	NA
ZNF85_AT_48735	7	NA
C7orf50_AD_78561	6	NA
CCL4L1_AA_40421	6	NA
FAM118A_AP_62656	6	NA
HSD3B7_AA_36213	6	NA
NMRAL1_RI_33738	6	NA
NT5C_RI_43359	6	NA
RPL10_RI_90572	6	NA
SDR39U1_AP_27007	6	NA
TOP1MT_ES_85418	6	NA
ACPL2_ES_67066	5	NA
CCL4L2_AA_40461	5	NA
FAM86C1_ES_17443	5	NA
GRTP1_AT_26372	5	NA
GRTP1_AT_26373	5	NA
IFT122_ES_66727	5	NA
IMMP1L_ES_14816	5	NA
KIF6_AT_76048	5	NA
KIF6_AT_76049	5	NA
KLHL24_ES_67806	5	NA
NEK3_AA_25992	5	NA
NEK3_ES_25994	5	NA
RRP8_ES_14159	5	NA
SH3D21_AT_1765	5	NA
SH3D21_AT_1766	5	NA
SMUG1_RI_22125	5	NA
ZNF211_ES_52310	5	NA
ZNF880_AT_51449	5	NA
GSKIP_AD_29198	NA	5	WA specific
IP6K2_AA_64751	NA	5
IP6K2_AA_64755	NA	5
IP6K2_AD_64748	NA	5
IP6K2_AD_64756	NA	5
IP6K2_ES_64758	NA	5
IP6K2_RI_64744	NA	5
IP6K2_RI_64750	NA	5
POMZP3_ES_80187	NA	5
TOR1AIP1_AA_9127	NA	5
ZDHHC4_ES_78754	NA	5
COX14_ME_101733	NA	4
IFI44L_ES_3553	NA	4
IP6K2_AD_64759	NA	4
IP6K2_ES_64757	NA	4
MT1G_AA_36491	NA	4
PDXDC1_AT_34113	NA	4
PDXDC1_AT_34115	NA	4
SULT1A2_RI_35811	NA	4
ZNF468_ES_51633	NA	4
ZNF83_RI_51484	NA	4
BFAR_ES_34095	NA	3
C8orf59_ES_84336	NA	3
EMC9_RI_26859	NA	3
KANSL2_AD_21461	NA	3
LRRC27_AT_13494	NA	3
NDUFA3_AD_51784	NA	3
NUDT2_ES_86162	NA	3
PPIL2_AA_61242	NA	3
RCAN1_AP_60494	NA	3
RMDN1_AA_84373	NA	3
STRBP_ES_87506	NA	3
THNSL2_ES_54471	NA	3
WDR27_ES_78474	NA	3
PSMG4_RI_75174	12	1	WB other
RBM23_ES_26652	11	1
RSU1_RI_10880	8	2
ELP5_AT_38887	7	1
ELP5_AT_38888	7	1
PRTG_AT_30742	7	1
PRTG_AT_30743	7	1
AURKA_ES_59866	6	2
AHI1_ES_77894	6	1
C14orf2_ES_29531	5	2
C7orf50_AD_78560	5	2
CCDC74A_AA_55390	5	2
EIF3C_ES_190574	5	2
SLC3A2_ES_16472	5	2
ATAD3A_AA_176	5	1
AURKA_ES_59864	5	1
FAH_AD_32181	5	1
ZNF880_AT_51448	5	1
LGMN_ES_29005	4	4	WA other
CYP3A5_RI_80711	4	3
LIMS3L_AT_54936	3	3
LIMS3L_AT_54938	3	3
TGIF1_AD_44507	3	3
THAP4_AP_58391	3	3
THAP4_AP_58392	3	3
ZNF223_ES_50275	3	3
PIGQ_ES_32903	2	5
PIGQ_ES_32904	2	5
MRPL43_AT_12849	2	4
MRPL43_AT_12851	2	4
P4HA2_ES_73263	2	4
ICAM3_RI_47503	2	3
LRRC27_AT_13493	2	3
MRPL43_ES_12857	2	3
ZDHHC4_AD_78753	2	3
ZNF331_AP_51722	2	3
IP6K2_AD_64746	1	5
IP6K2_RI_64745	1	5
C8orf59_AD_84334	1	4
ACTG1_RI_44121	1	3
IREB2_RI_32090	1	3
SERHL2_AD_62508	1	3
SLC39A1_RI_7767	1	3
TMEM176A_AD_82265	1	3
ZNF410_ES_28329	1	3
ATPIF1_RI_1380	4	NA	other
BCAS4_ES_59783	4	NA
C16orf13_ES_32923	4	NA
CAPN15_ES_32896	4	NA
CDHR1_AT_12397	4	NA
CDHR1_AT_12398	4	NA
CLDN11_AT_67616	4	NA
CLDN11_AT_67617	4	NA
CMC2_ES_37725	4	NA
DDX60L_AA_71119	4	NA
GNB2L1_ES_127737	4	NA
NBPF10_ES_4449	4	NA
NFKB1_AP_70108	4	NA
NOTCH2NL_AT_4437	4	NA
NOTCH2NL_AT_4438	4	NA
NUP85_AP_43382	4	NA
NUP85_AP_43383	4	NA
PSMG4_RI_75175	4	NA
QTRT1_RI_47582	4	NA
RAB7L1_RI_9570	4	NA
RNH1_ES_13674	4	NA
RPS9_ES_51824	4	NA
SAT2_ES_39031	4	NA
ST6GAL2_AT_54866	4	NA
ST6GAL2_AT_54867	4	NA
TIMMDC1_ES_66322	4	NA
ZNF69_AA_47759	4	NA
ZNF786_ES_82164	4	NA
ZNF786_ES_82165	4	NA
ABHD17A_AP_46554	3	NA
ABI2_ES_57061	3	NA
ADAL_ES_30238	3	NA
ALG8_ES_18011	3	NA
ANKRD9_AA_29420	3	NA
ARGLU1_ES_26233	3	NA
ARL6IP4_AA_25031	3	NA
AURKAIP1_RI_148	3	NA
B4GALT4_ES_66288	3	NA
C12orf23_ES_24185	3	NA
CCDC14_ES_66493	3	NA
CD74_AA_99692	3	NA
CD74_ES_152981	3	NA
DHRS4_ES_26788	3	NA
DMKN_ES_49151	3	NA
DMKN_ES_49163	3	NA
DMKN_ES_49173	3	NA
EEF1A1_RI_76758	3	NA
EEF1D_ES_85447	3	NA
EFCAB4B_AT_19757	3	NA
EFCAB4B_AT_19759	3	NA
EIF3M_ES_14856	3	NA
EP400NL_ES_25252	3	NA
FAM86B1_ES_82698	3	NA
FAM86B2_ES_82741	3	NA
FOXRED1_ES_19377	3	NA
FRG1B_ES_58883	3	NA
GNB2L1_ES_190578	3	NA
HIRA_AP_61047	3	NA
HIRA_AP_61048	3	NA
INO80E_ES_36004	3	NA
IRF3_ES_50998	3	NA
JMJD1C_AP_11888	3	NA
JMJD1C_AP_11889	3	NA
KCNN3_AP_7840	3	NA
KCNN3_AP_7841	3	NA
KIAA0586_ES_27717	3	NA
LETMD1_AD_21796	3	NA
MAN2C1_AA_31865	3	NA
MRPL52_RI_26642	3	NA
NFKB1_AP_70110	3	NA
NME4_ES_32879	3	NA
NPIPB4_RI_34760	3	NA
OAS1_AT_24599	3	NA
ODF3B_AA_62858	3	NA
OSGEP_RI_26443	3	NA
PPIL3_ES_127875	3	NA
PPP4C_ES_94130	3	NA
PQLC3_ES_52677	3	NA
PRDM2_ES_725	3	NA
RNF212_AT_68448	3	NA
RNF212_AT_68450	3	NA
RPL10_AP_90568	3	NA
RPS2_RI_33175	3	NA
RRP8_ES_14160	3	NA
RWDD4_ES_71280	3	NA
SDR39U1_AP_27004	3	NA
SLC3A2_ES_16468	3	NA
SLC6A8_AP_90462	3	NA
SLC6A8_AP_90463	3	NA
SMCO4_AP_18299	3	NA
SMCO4_AP_18300	3	NA
SPG20_AP_25638	3	NA
STT3A_ES_19304	3	NA
SYT17_AP_34292	3	NA
TBC1D31_ES_85034	3	NA
TDP1_ES_28815	3	NA
TDRKH_RI_7663	3	NA
TMEM216_AA_16189	3	NA
TMEM66_ES_83269	3	NA
TMPRSS4_AA_18965	3	NA
TUBGCP6_AD_62794	3	NA
WARS_ES_29288	3	NA
ZNF208_AT_48801	3	NA
ABHD17A_AP_46553	2	NA
ABI2_ES_57054	2	NA
ACAA1_RI_64019	2	NA
ADAL_AT_30232	2	NA
ADAL_AT_30234	2	NA
AMPD3_AP_14346	2	NA
ANGPT1_AP_84859	2	NA
ANGPT1_AP_84860	2	NA
ANKLE2_AP_25295	2	NA
ANKLE2_AP_25296	2	NA
APBB2_ES_69101	2	NA
ARHGAP32_RI_19451	2	NA
ARHGEF16_AP_308	2	NA
ARMC5_RI_36260	2	NA
ASB16_AD_41780	2	NA
AURKA_ES_59868	2	NA
B3GAT3_AA_16371	2	NA
BBC3_AP_50632	2	NA
BBC3_AP_50633	2	NA
BCAS4_ES_59784	2	NA
BOLA1_ES_7408	2	NA
BSCL2_AP_16400	2	NA
C14orf105_AA_27661	2	NA
C14orf2_ES_29533	2	NA
C16orf59_RI_33269	2	NA
C16orf93_AA_36186	2	NA
C1orf51_AA_7459	2	NA
C2orf81_AP_54050	2	NA
C2orf81_AP_54051	2	NA
C4orf22_AT_69679	2	NA
C4orf22_AT_69680	2	NA
C5orf45_ES_74969	2	NA
CASP1_AA_18541	2	NA
CASP1_AP_18514	2	NA
CASP1_AP_18515	2	NA
CBWD1_ES_85690	2	NA
CBWD2_ES_55054	2	NA
CCDC106_RI_52130	2	NA
CCL4L1_RI_40420	2	NA
CD74_ES_152982	2	NA
CDH7_AT_45743	2	NA
CDH7_AT_45744	2	NA
CECR1_AP_60971	2	NA
CENPM_AP_62467	2	NA
CERS5_ES_21681	2	NA
CMC2_ES_37720	2	NA
CNTNAP3B_AT_86484	2	NA
CNTNAP3B_ES_86486	2	NA
COA6_RI_10337	2	NA
COL1A2_ES_484881	2	NA
COLEC11_AP_52579	2	NA
COPS3_ES_39473	2	NA
COX7C_RI_72714	2	NA
CPNE1_AP_59179	2	NA
CPNE1_AP_59180	2	NA
CPNE1_ES_59190	2	NA
CPNE1_ES_59198	2	NA
CPNE5_AP_75990	2	NA
CPNE5_AP_75991	2	NA
CREM_ES_11285	2	NA
CSNK1D_ES_44311	2	NA
CXXC5_AP_73623	2	NA
CXXC5_AP_73624	2	NA
DDX11_AA_20974	2	NA
DDX11_ES_20965	2	NA
DDX5_ES_43064	2	NA
DENND1B_ES_9307	2	NA
DENND3_AP_85325	2	NA
DENND3_AP_85326	2	NA
DLC1_AP_82764	2	NA
DMBT1_ES_13366	2	NA
DMKN_ES_49161	2	NA
DNAH2_AT_39052	2	NA
DNAH2_AT_39053	2	NA
DUSP18_AD_61797	2	NA
ECI2_AA_75226	2	NA
EEF1A1_ES_319302	2	NA
EFCAB2_RI_10484	2	NA
EP400NL_AP_25239	2	NA
EP400NL_AP_25240	2	NA
EP400NL_RI_25250	2	NA
ERBB3_AP_22353	2	NA
FADS2_AP_16291	2	NA
FADS3_RI_16305	2	NA
FAIM_ES_67016	2	NA
FAM120C_AT_89237	2	NA
FAM120C_AT_89238	2	NA
FAM177A1_AP_27182	2	NA
FAM177A1_AP_27183	2	NA
FAM177A1_RI_27187	2	NA
FAM195B_RI_44177	2	NA
FAM227B_AD_30549	2	NA
FAM86A_ES_33883	2	NA
FAM86B1_ES_82692	2	NA
FAM86B1_ES_82695	2	NA
FAT3_AT_18278	2	NA
FAT3_AT_18279	2	NA
FCGRT_ES_50968	2	NA
FCRL3_RI_8348	2	NA
FGD3_AP_86892	2	NA
FLNA_ES_499333	2	NA
FMNL1_AP_41952	2	NA
FMNL1_AP_41953	2	NA
FOXP1_AP_65594	2	NA
FOXP1_AP_65598	2	NA
GAS2L1_RI_61596	2	NA
GCAT_ES_62158	2	NA
GNAS_AP_59995	2	NA
GNAS_AP_59996	2	NA
GNB2L1_ES_190579	2	NA
GOLM1_AP_86743	2	NA
GOLM1_AP_86745	2	NA
GPM6B_AA_88529	2	NA
GRN_ES_522183	2	NA
HARS2_AD_73743	2	NA
HAUS5_RI_49218	2	NA
HERC2_ES_29747	2	NA
HES4_RI_6	2	NA
HMGN1_ES_60616	2	NA
HNRNPA1_ES_212638	2	NA
HNRNPA1_ES_212642	2	NA
HNRNPA1_ES_485363	2	NA
HNRNPL_AP_49697	2	NA
HNRNPL_AP_49698	2	NA
HP_ES_37531	2	NA
IL18BP_RI_17496	2	NA
IL32_AD_33439	2	NA
IL32_RI_33417	2	NA
IMMP1L_ES_14821	2	NA
INO80E_ES_36009	2	NA
JAM2_AT_60253	2	NA
JAM2_AT_60254	2	NA
KIAA1377_AP_18434	2	NA
KIAA1377_AP_18435	2	NA
KIF4A_AT_89372	2	NA
KIF4A_AT_89373	2	NA
LPXN_AP_16009	2	NA
LPXN_AP_16010	2	NA
LRP2BP_RI_71339	2	NA
LRRC23_AP_19994	2	NA
LRRC23_AP_19997	2	NA
LRRC29_RI_36982	2	NA
LRRFIP1_AP_58128	2	NA
LRRFIP1_AP_58129	2	NA
LUC7L_ES_32850	2	NA
LUC7L3_RI_42474	2	NA
MACF1_AP_1870	2	NA
MAGI3_ES_4273	2	NA
METRN_AP_32960	2	NA
METRN_AP_32961	2	NA
METTL17_RI_26475	2	NA
METTL3_RI_26595	2	NA
MRPS12_RI_49736	2	NA
MYH10_ES_39199	2	NA
MYLK_AP_66478	2	NA
NADK_AP_228	2	NA
NAPA_ES_50658	2	NA
NBPF10_ES_7268	2	NA
NBPF20_ES_155354	2	NA
NCALD_ES_84757	2	NA
NCBP2_AD_68268	2	NA
NEDD4L_AP_45652	2	NA
NEK2_AT_9717	2	NA
NEK2_AT_9718	2	NA
NFE2L1_AP_42157	2	NA
NFE2L1_AP_42158	2	NA
NFIB_ES_85889	2	NA
NMRAL1_AD_33739	2	NA
NPDC1_AP_88260	2	NA
NPDC1_AP_88261	2	NA
NPIPA5_AD_34149	2	NA
NPIPB3_ES_94006	2	NA
NPIPB4_AP_34534	2	NA
NPIPB4_ES_35510	2	NA
NSMF_AA_88315	2	NA
NSUN5_ES_97504	2	NA
OAZ1_ES_46599	2	NA
PCDHAC1_AT_73787	2	NA
PCDHAC1_AT_73788	2	NA
PDE4DIP_AP_4407	2	NA
PFDN5_ES_22001	2	NA
PHACTR2_ES_77987	2	NA
PHB2_ES_20044	2	NA
PIDD_RI_13768	2	NA
PIGC_RI_9005	2	NA
PKIB_AP_77379	2	NA
PLCH2_ES_274	2	NA
PLEKHM1_ES_41974	2	NA
POLR2J3_ES_81113	2	NA
PPIE_ES_1905	2	NA
PPP1R9A_ES_80519	2	NA
PTCD2_AD_72469	2	NA
PTGIR_AT_50569	2	NA
PTGIR_AT_50570	2	NA
RAB40A_AP_89734	2	NA
RAB40A_AP_89735	2	NA
RBFOX2_AP_61979	2	NA
RBFOX2_AP_61982	2	NA
RHBDL2_AP_1859	2	NA
RIMKLB_AT_20202	2	NA
RIMKLB_AT_20203	2	NA
RNH1_ES_13676	2	NA
RPL13A_ES_264941	2	NA
RPL21_AD_25525	2	NA
RPL23_AA_94524	2	NA
RPL28_RI_52100	2	NA
RPL32_RI_63467	2	NA
RPL34_AT_70298	2	NA
RPL34_AT_70300	2	NA
RPS3A_ES_70824	2	NA
RUFY3_AP_69444	2	NA
RUFY3_AP_69445	2	NA
RWDD3_ES_91021	2	NA
SCNN1A_ES_19842	2	NA
SDHA_ES_220421	2	NA
SEC24C_AA_114552	2	NA
SF3A1_ES_61730	2	NA
SFTPB_AA_54324	2	NA
SHC1_AP_7854	2	NA
SHC1_AP_7855	2	NA
SLC25A3_AD_23856	2	NA
SLC3A2_ES_16470	2	NA
SMAD5_ES_73475	2	NA
SNAPC2_AP_47195	2	NA
SNAPC2_AP_47196	2	NA
SPATA6L_AT_85752	2	NA
SPINK5_ES_73970	2	NA
ST3GAL6_AP_65791	2	NA
STAMBPL1_AP_12468	2	NA
STX2_ES_25202	2	NA
SYT17_AP_34290	2	NA
TBCK_AP_70263	2	NA
TBCK_AP_70265	2	NA
TC2N_AP_28883	2	NA
TC2N_AP_28884	2	NA
TEAD2_AP_50917	2	NA
TENC1_AP_21925	2	NA
TET2_RI_70189	2	NA
TGIF1_AD_44508	2	NA
TGIF1_ES_44512	2	NA
THAP2_AT_23408	2	NA
THAP2_AT_23409	2	NA
TIMMDC1_ES_66313	2	NA
TIMMDC1_ES_66321	2	NA
TLDC1_ES_37852	2	NA
TM4SF1_AD_67224	2	NA
TMBIM4_AD_22897	2	NA
TMSB15B_RI_89789	2	NA
TNFRSF10C_AT_83064	2	NA
TNFRSF10C_AT_83065	2	NA
TNKS_AP_82594	2	NA
TNKS_AP_82595	2	NA
TPM1_ES_31003	2	NA
TPM4_AP_48124	2	NA
TPM4_AP_48125	2	NA
TPSAB1_RI_33047	2	NA
TRIM16_RI_39368	2	NA
TRNT1_ES_62979	2	NA
TROAP_AA_93042	2	NA
TROAP_RI_21560	2	NA
TRPV3_AT_38442	2	NA
TRPV3_AT_38443	2	NA
TSHZ2_AP_59816	2	NA
TSHZ2_AP_59817	2	NA
USP8_ES_30585	2	NA
VPS8_ES_67977	2	NA
WASH4P_AA_32782	2	NA
WDR37_AP_10613	2	NA
WDR52_ES_66201	2	NA
WDR74_AP_16453	2	NA
WDR74_AP_16454	2	NA
XRRA1_ES_17789	2	NA
YIF1B_AP_49603	2	NA
YIF1B_AP_49604	2	NA
YIF1B_AT_49606	2	NA
YIF1B_AT_49607	2	NA
ZCCHC10_AT_73326	2	NA
ZCCHC10_AT_73327	2	NA
ZDHHC4_AD_78748	2	NA
ZKSCAN5_AP_80656	2	NA
ZNF169_AT_86927	2	NA
ZNF208_AT_48798	2	NA
ZNF266_RI_47344	2	NA
ZNF302_AA_48982	2	NA
ZNF493_AT_48769	2	NA
ZNF606_AT_52380	2	NA
ZNF670_AT_10507	2	NA
ZNF692_AP_10547	2	NA
ZNF692_AP_10549	2	NA
ZNF695_AT_10501	2	NA
ZNF695_AT_10502	2	NA
ZSCAN20_AT_1678	2	NA
ZSCAN20_AT_1679	2	NA
ZSWIM7_ES_39406	2	NA
AAMDC_ES_17980	1	NA
ABCA2_AA_88255	1	NA
ABCA9_AT_43157	1	NA
ABCA9_AT_43158	1	NA
ABCC3_RI_42464	1	NA
ABCD4_AD_28384	1	NA
ABCD4_ES_28385	1	NA
ABCE1_ES_70753	1	NA
ABHD14B_ES_65143	1	NA
ABI1_ES_11042	1	NA
ABL2_AP_9101	1	NA
ABL2_AP_9102	1	NA
ACAA1_AD_64017	1	NA
ACACA_AP_40505	1	NA
ACAN_AT_32395	1	NA
ACAN_AT_32396	1	NA
ACAP1_AP_38919	1	NA
ACBD5_AP_11066	1	NA
ACBD5_AP_11067	1	NA
ACBD5_RI_11071	1	NA
ACHE_AA_81027	1	NA
ACMSD_ES_212198	1	NA
ACOT8_ES_59633	1	NA
ACTR10_ES_27682	1	NA
ACY1_ES_390894	1	NA
ADAM15_ES_7913	1	NA
ADAMTS12_AT_71686	1	NA
ADAMTS12_AT_71687	1	NA
ADAMTS13_AP_88045	1	NA
ADAMTS13_AP_88047	1	NA
ADCK5_RI_85590	1	NA
ADD3_AP_13075	1	NA
ADD3_AP_13076	1	NA
ADORA3_AT_4174	1	NA
ADORA3_AT_4175	1	NA
ADRA1A_AT_83135	1	NA
ADRA1A_AT_83140	1	NA
AFTPH_ES_95552	1	NA
AGAP5_ES_402436	1	NA
AGPAT4_RI_78370	1	NA
AK5_AP_3523	1	NA
AK5_AP_3524	1	NA
AKNA_AP_87314	1	NA
AKNA_AP_87317	1	NA
AKR1C2_AT_10650	1	NA
AKR1C2_AT_10651	1	NA
ALAS1_ES_65185	1	NA
ALDH3A1_AP_39769	1	NA
ALDH3A1_AP_39770	1	NA
ALG10_AT_21064	1	NA
ALG10_AT_21065	1	NA
ALG10B_AT_21067	1	NA
ALG10B_AT_21068	1	NA
ALKBH6_RI_49326	1	NA
ALPL_AP_972	1	NA
AMACR_ES_71705	1	NA
AMN1_ES_21013	1	NA
ANK2_ES_70397	1	NA
ANKRD10_ES_26273	1	NA
ANKRD10_ES_26274	1	NA
ANKRD10_ME_105827	1	NA
ANKRD17_AP_69480	1	NA
ANKRD17_AP_69481	1	NA
ANKRD28_AP_63623	1	NA
ANKRD28_AP_63624	1	NA
ANKRD30B_AT_44760	1	NA
ANKRD30B_AT_44762	1	NA
ANKRD36_AT_54595	1	NA
ANKRD54_AP_62161	1	NA
ANKRD54_AP_62163	1	NA
ANO1_ES_17387	1	NA
ANXA8L2_ES_11459	1	NA
AP3S2_ES_32453	1	NA
AP4M1_AP_80884	1	NA
AP4M1_AP_80885	1	NA
APH1A_ES_7452	1	NA
APOC1_ES_50368	1	NA
APOD_ES_68181	1	NA
APOL4_AD_62009	1	NA
APOPT1_ES_29464	1	NA
APTX_ES_86090	1	NA
AQP1_AP_79157	1	NA
AQP1_AP_79158	1	NA
ARFGAP2_ES_15667	1	NA
ARHGAP12_ES_11153	1	NA
ARHGEF16_AP_307	1	NA
ARHGEF3_AP_65361	1	NA
ARHGEF39_AT_86271	1	NA
ARHGEF39_AT_86272	1	NA
ARHGEF7_RI_26294	1	NA
ARL16_AD_44157	1	NA
ARL17A_ES_42031	1	NA
ARMC10_ES_81159	1	NA
ARMC6_AD_48582	1	NA
ARMC8_ES_66965	1	NA
ASH1L_AP_8083	1	NA
ASH1L_AP_8084	1	NA
ATAD3A_AP_174	1	NA
ATAD3A_AP_175	1	NA
ATG4B_AD_58398	1	NA
ATP11A_ES_99395	1	NA
ATP13A3_AP_68152	1	NA
ATP13A3_AP_68153	1	NA
ATP5D_RI_46401	1	NA
ATP5J_AD_60270	1	NA
ATP8B3_AT_46543	1	NA
ATP8B3_AT_46544	1	NA
ATXN2L_AA_35835	1	NA
ATXN7_AP_65517	1	NA
ATXN7L1_ES_81312	1	NA
AZI2_AT_63793	1	NA
AZI2_AT_63794	1	NA
B4GALT2_AP_2514	1	NA
B4GALT2_AP_2515	1	NA
B4GALT4_ES_66287	1	NA
BAX_ES_95287	1	NA
BBIP1_ES_13098	1	NA
BCAR3_AP_3795	1	NA
BCAS3_AP_42864	1	NA
BCAS3_AP_42865	1	NA
BCAS4_ES_59787	1	NA
BCAT2_ES_50814	1	NA
BCL2L11_ES_54965	1	NA
BCL2L11_ME_54952	1	NA
BCL7B_ES_79959	1	NA
BDH1_AP_68297	1	NA
BDH1_AP_68298	1	NA
BEST3_AT_23330	1	NA
BEST3_AT_23332	1	NA
BHMT2_ES_221188	1	NA
BICD1_AT_21019	1	NA
BICD1_AT_21020	1	NA
BIN1_ES_55193	1	NA
BIN1_ES_55200	1	NA
BLOC1S6_ES_30433	1	NA
BLOC1S6_ES_30437	1	NA
BNC2_AT_85934	1	NA
BNC2_AT_85935	1	NA
BOD1_ES_96993	1	NA
BRF1_AP_29605	1	NA
BRF1_AP_29608	1	NA
BROX_AP_9894	1	NA
BROX_AP_9895	1	NA
BSCL2_AD_16409	1	NA
BTN3A2_ES_75623	1	NA
BTNL9_AT_75037	1	NA
C11orf57_AD_18728	1	NA
C11orf73_ES_18187	1	NA
C11orf88_RI_18667	1	NA
C12orf43_ES_24819	1	NA
C12orf65_AP_25058	1	NA
C12orf65_AP_25060	1	NA
C14orf105_AA_27662	1	NA
C14orf105_AD_27664	1	NA
C15orf57_AD_29999	1	NA
C15orf57_AT_29992	1	NA
C15orf57_AT_29993	1	NA
C17orf104_AT_41878	1	NA
C17orf104_AT_41879	1	NA
C17orf80_AP_43218	1	NA
C19orf25_RI_46507	1	NA
C19orf54_AD_49969	1	NA
C19orf82_ES_47381	1	NA
C19orf82_ES_47382	1	NA
C1D_AD_53823	1	NA
C1D_ES_53822	1	NA
C1orf86_AP_244	1	NA
C1orf86_AP_245	1	NA
C20orf196_AT_58656	1	NA
C20orf196_AT_58657	1	NA
C20orf26_AT_58825	1	NA
C20orf26_AT_58827	1	NA
C4orf47_ES_71354	1	NA
C4orf48_AD_68544	1	NA
C5orf38_AT_71502	1	NA
C5orf38_AT_71503	1	NA
C5orf45_ES_74972	1	NA
C5orf63_AT_73181	1	NA
C6orf141_AT_76447	1	NA
C6orf141_AT_76449	1	NA
C6orf163_AP_76953	1	NA
C6orf163_AP_76954	1	NA
C8orf44_AT_84028	1	NA
C8orf44_AT_84029	1	NA
C9orf117_AT_87643	1	NA
C9orf117_AT_87644	1	NA
C9orf117_RI_87645	1	NA
C9orf3_AP_86939	1	NA
C9orf3_AP_86941	1	NA
CA5B_ES_98313	1	NA
CABP1_AP_24774	1	NA
CABP1_AP_24775	1	NA
CABYR_AD_44864	1	NA
CALCOCO1_RI_22108	1	NA
CALD1_AP_81856	1	NA
CAMTA2_AA_38637	1	NA
CAMTA2_ES_38635	1	NA
CARD8_ES_50715	1	NA
CARF_AT_56965	1	NA
CARF_AT_56967	1	NA
CASP3_ES_71300	1	NA
CASP7_AP_13166	1	NA
CATSPERG_ES_49635	1	NA
CBFA2T2_AP_58986	1	NA
CBWD5_ES_86506	1	NA
CC2D2A_AT_68806	1	NA
CC2D2A_AT_68807	1	NA
CCDC108_AT_57579	1	NA
CCDC14_AD_66491	1	NA
CCDC159_AD_47686	1	NA
CCDC28B_RI_1562	1	NA
CCDC64B_AP_33364	1	NA
CCDC74B_AA_55281	1	NA
CCDC74B_AD_55284	1	NA
CCDC84_AD_19052	1	NA
CCDC91_ES_20920	1	NA
CCDC92_AP_25120	1	NA
CCDC92_AP_25121	1	NA
CCL14_AP_40366	1	NA
CCL14_AP_40367	1	NA
CCL4L1_RI_40403	1	NA
CCND3_AP_76154	1	NA
CCNL2_AT_155	1	NA
CCNL2_AT_157	1	NA
CCT7_ES_53963	1	NA
CD200_ES_66103	1	NA
CD320_ES_47212	1	NA
CD33_ES_51316	1	NA
CD44_ES_15142	1	NA
CD44_ES_15143	1	NA
CD44_ES_15268	1	NA
CD44_ES_15270	1	NA
CD44_ES_15274	1	NA
CD46_ES_9661	1	NA
CD74_ES_74082	1	NA
CDC14B_AP_86971	1	NA
CDC14B_AP_86972	1	NA
CDC42SE2_RI_73223	1	NA
CDC7_AP_3736	1	NA
CDC7_AP_3737	1	NA
CDH16_ES_392164	1	NA
CDHR3_AP_81315	1	NA
CDHR3_AP_81316	1	NA
CDK10_ES_38118	1	NA
CDK16_AP_88911	1	NA
CDKL3_AT_73366	1	NA
CDKL3_AT_73367	1	NA
CDKL3_ES_73374	1	NA
CELF1_ES_15768	1	NA
CENPI_AP_89628	1	NA
CENPI_AP_89629	1	NA
CENPM_AP_62466	1	NA
CENPN_AT_37739	1	NA
CENPN_AT_37740	1	NA
CFLAR_ES_56799	1	NA
CGREF1_AP_52930	1	NA
CHI3L2_AP_4144	1	NA
CHI3L2_AP_4146	1	NA
CHID1_AT_13806	1	NA
CHID1_AT_13807	1	NA
CHN1_AP_56046	1	NA
CHN1_AP_56047	1	NA
CHN2_AP_79083	1	NA
CHTOP_AD_7748	1	NA
CKLF-CMTM1_AT_36738	1	NA
CLDN15_RI_81051	1	NA
CLEC1A_ES_20304	1	NA
CLEC2B_AP_20282	1	NA
CLEC2B_AP_20283	1	NA
CLEC3A_AT_37670	1	NA
CLEC3A_AT_37671	1	NA
CLEC7A_ES_20316	1	NA
CLIC5_AT_76410	1	NA
CLIC5_AT_76411	1	NA
CLK4_RI_74874	1	NA
CLOCK_AP_69328	1	NA
CLOCK_AP_69329	1	NA
CLPTM1_AD_50381	1	NA
CLYBL_RI_26188	1	NA
CMC2_AP_37702	1	NA
CMC2_AP_37703	1	NA
CNEP1R1_AP_36356	1	NA
CNEP1R1_AP_36357	1	NA
CNGA1_ES_69194	1	NA
CNOT2_AA_23377	1	NA
CNOT2_ES_23376	1	NA
CNTNAP3_ES_86473	1	NA
COBLL1_ES_55788	1	NA
COL18A1_AP_60874	1	NA
COL18A1_AP_60875	1	NA
COL1A1_ES_265303	1	NA
COL1A1_ES_265304	1	NA
COL1A1_ES_265650	1	NA
COL1A1_ES_316103	1	NA
COL1A1_ES_316104	1	NA
COL1A1_ES_402662	1	NA
COL1A1_ES_402675	1	NA
COL1A1_ES_402696	1	NA
COL1A1_ES_402801	1	NA
COL1A1_ES_402821	1	NA
COL1A1_ES_409259	1	NA
COL1A1_ES_434932	1	NA
COL1A1_ES_435679	1	NA
COL1A1_ES_435704	1	NA
COL1A2_ES_200809	1	NA
COL1A2_ES_216823	1	NA
COL1A2_ES_276597	1	NA
COL1A2_ES_306251	1	NA
COL1A2_ES_306254	1	NA
COL1A2_ES_306273	1	NA
COL1A2_ES_306274	1	NA
COL1A2_ES_306281	1	NA
COL1A2_ES_387254	1	NA
COL1A2_ES_484870	1	NA
COL1A2_ES_484872	1	NA
COL1A2_ES_484874	1	NA
COL1A2_ES_484875	1	NA
COL1A2_ES_484896	1	NA
COL1A2_ES_484928	1	NA
COL3A1_ES_267009	1	NA
COL3A1_ES_306303	1	NA
COL3A1_ES_306304	1	NA
COL3A1_ES_485088	1	NA
COL3A1_ES_485145	1	NA
COL3A1_ES_485146	1	NA
COL3A1_ES_485156	1	NA
COL3A1_ES_485162	1	NA
COL3A1_ES_485163	1	NA
COL3A1_ES_485176	1	NA
COL4A6_AT_89858	1	NA
COL4A6_AT_89859	1	NA
COL6A2_ES_485183	1	NA
COL8A1_ES_65802	1	NA
COLEC11_AP_52578	1	NA
COLEC11_ES_52583	1	NA
COMT_AP_61097	1	NA
COPS7B_ES_57958	1	NA
COQ10A_AP_22414	1	NA
COQ10A_AP_22415	1	NA
COX4I1_AA_156373	1	NA
COX4I1_ES_116582	1	NA
COX4I1_ES_156376	1	NA
CP_AT_67213	1	NA
CP_AT_67214	1	NA
CPLX2_AP_74610	1	NA
CPLX2_AP_74612	1	NA
CPSF7_ES_16203	1	NA
CREB5_AP_79075	1	NA
CRELD1_RI_63293	1	NA
CRELD2_ES_62760	1	NA
CREM_ES_11261	1	NA
CREM_ES_11293	1	NA
CRYGS_AP_68046	1	NA
CRYGS_AP_68047	1	NA
CS_ES_22418	1	NA
CSDE1_ES_4338	1	NA
CSMD2_AT_1689	1	NA
CTCFL_AT_59905	1	NA
CTTN_ES_17403	1	NA
CTTNBP2_AD_81577	1	NA
CUL2_ES_11224	1	NA
CYFIP2_AP_74322	1	NA
CYFIP2_AP_74325	1	NA
CYP46A1_AT_29229	1	NA
CYP46A1_AT_29230	1	NA
D2HGDH_ES_58416	1	NA
D2HGDH_ES_58418	1	NA
D2HGDH_ES_58419	1	NA
D2HGDH_ES_58422	1	NA
D2HGDH_RI_58415	1	NA
DAPK2_ES_31077	1	NA
DAPK2_RI_31075	1	NA
DBNDD1_AP_38196	1	NA
DBNDD1_AP_38197	1	NA
DBNDD2_AP_59536	1	NA
DCAF8_ES_8441	1	NA
DCAF8_ES_8447	1	NA
DCAF8_ES_8448	1	NA
DCLK2_ES_70807	1	NA
DCTN6_ES_83284	1	NA
DCUN1D4_ME_69274	1	NA
DDB2_ES_15675	1	NA
DDX11_ES_20968	1	NA
DDX19A_ES_37382	1	NA
DECR2_ES_32892	1	NA
DENND2A_AT_82008	1	NA
DENND2A_AT_82009	1	NA
DEPDC5_AA_61902	1	NA
DFNB59_AP_56164	1	NA
DFNB59_AP_56165	1	NA
DGKA_AP_22295	1	NA
DHRS4L2_ES_26801	1	NA
DICER1_AP_29159	1	NA
DIP2C_AP_10593	1	NA
DIP2C_AP_10595	1	NA
DISC1_AT_10282	1	NA
DMAP1_RI_2547	1	NA
DMGDH_AT_72617	1	NA
DMGDH_AT_72618	1	NA
DMKN_ES_49166	1	NA
DMKN_ES_49167	1	NA
DMKN_ES_49169	1	NA
DMKN_ES_49170	1	NA
DMKN_ES_49184	1	NA
DMKN_ES_49185	1	NA
DMKN_ES_49186	1	NA
DMKN_ES_49188	1	NA
DMKN_ES_49189	1	NA
DMKN_ES_49204	1	NA
DMPK_ES_50523	1	NA
DMTF1_AA_80303	1	NA
DNAH14_AT_9968	1	NA
DNAH14_AT_9969	1	NA
DNAH7_AT_56629	1	NA
DNAH7_AT_56630	1	NA
DNAJB5_RI_86223	1	NA
DNAJC14_AP_22260	1	NA
DNAJC14_AP_22262	1	NA
DOCK9_AP_26171	1	NA
DOCK9_AP_26172	1	NA
DPP8_ES_31175	1	NA
DPY19L2_AP_22846	1	NA
DPY19L2_AP_22847	1	NA
DRG2_ES_39561	1	NA
DROSHA_ES_96874	1	NA
DSE_AP_77313	1	NA
DTD2_RI_27119	1	NA
DUSP18_AT_61794	1	NA
DUT_AP_30484	1	NA
DYNC2LI1_AA_53400	1	NA
ECHDC2_ES_3028	1	NA
ECT2_ES_67657	1	NA
EED_ES_18181	1	NA
EFNA3_AP_7936	1	NA
EFNA3_AP_7937	1	NA
EIF4E2_AT_58000	1	NA
EIF4G1_ES_67902	1	NA
ELMOD3_AA_54251	1	NA
ELMOD3_AD_54211	1	NA
ELMOD3_ES_54250	1	NA
ELOVL6_RI_70354	1	NA
ELP4_ES_14825	1	NA
EMID1_ME_61575	1	NA
EML2_ES_50500	1	NA
EMP1_AA_20538	1	NA
ENO2_AP_20011	1	NA
ENO2_AP_20012	1	NA
ENOSF1_ES_123119	1	NA
EP400NL_RI_25246	1	NA
EPB41L3_ES_44533	1	NA
EPHA3_AT_65671	1	NA
EPHA3_AT_65672	1	NA
EPS15L1_AP_48151	1	NA
EPS15L1_AP_48152	1	NA
ERBB2_AP_40677	1	NA
ERC1_AD_19664	1	NA
ERN2_AA_35635	1	NA
ERO1LB_AT_10369	1	NA
ERO1LB_AT_10370	1	NA
ESCO2_AT_83184	1	NA
ESCO2_AT_83185	1	NA
ESR2_AT_27869	1	NA
ETFA_ES_31939	1	NA
ETFB_AP_51319	1	NA
ETFB_AP_51320	1	NA
EVL_AP_29240	1	NA
EXOC7_ES_43566	1	NA
EXOSC3_AT_86444	1	NA
EXOSC3_AT_86445	1	NA
FAM104B_AT_89277	1	NA
FAM104B_AT_89278	1	NA
FAM114A1_ES_69037	1	NA
FAM118A_AP_62658	1	NA
FAM134C_AP_41082	1	NA
FAM134C_AP_41083	1	NA
FAM153B_AT_74626	1	NA
FAM153B_AT_74628	1	NA
FAM185A_AD_81138	1	NA
FAM193B_ES_74800	1	NA
FAM214B_AP_86242	1	NA
FAM221A_ES_78994	1	NA
FAM228B_ES_102032	1	NA
FAM228B_ES_52815	1	NA
FAM47E_AP_69599	1	NA
FAM47E_AP_69600	1	NA
FAM49B_AP_85137	1	NA
FAM49B_AP_85138	1	NA
FAM63A_AA_7539	1	NA
FAM76A_ES_1344	1	NA
FAM76B_ES_18383	1	NA
FAM86A_ES_33886	1	NA
FAM86A_ES_33890	1	NA
FAM86B1_AA_82715	1	NA
FAM86B1_ES_82685	1	NA
FAM86B1_ES_82686	1	NA
FAM86B1_ES_82688	1	NA
FAM86B1_ES_82689	1	NA
FAM86B1_ES_82694	1	NA
FAM86B1_ES_82706	1	NA
FAM86B1_ES_82707	1	NA
FAM86B1_ES_82708	1	NA
FAM86B1_ES_82713	1	NA
FAM86B2_AD_82740	1	NA
FAM86C1_ES_17436	1	NA
FAM86C1_ES_17438	1	NA
FAM86C1_ES_17439	1	NA
FARS2_AP_75245	1	NA
FARS2_AP_75246	1	NA
FAU_AA_16772	1	NA
FAU_AD_16773	1	NA
FBP1_AP_86936	1	NA
FBP1_AP_86937	1	NA
FBXL12_AD_47429	1	NA
FBXL19_AP_36199	1	NA
FBXL19_AP_36201	1	NA
FBXO18_AP_10669	1	NA
FBXO36_ES_57858	1	NA
FBXO4_ES_71889	1	NA
FBXW7_AP_70846	1	NA
FBXW7_AP_70849	1	NA
FDFT1_ES_389989	1	NA
FDFT1_ES_82653	1	NA
FDFT1_ES_82657	1	NA
FEZ2_AP_53193	1	NA
FEZ2_AP_53195	1	NA
FGD4_AP_21029	1	NA
FGF13_AP_90231	1	NA
FGF13_AP_90232	1	NA
FGFR1_ES_83430	1	NA
FHL2_ES_54828	1	NA
FIGNL1_AA_79694	1	NA
FILIP1_AT_76788	1	NA
FILIP1_AT_76789	1	NA
FIP1L1_AT_69310	1	NA
FIP1L1_AT_69311	1	NA
FKBP3_ES_27404	1	NA
FKBP7_ES_56166	1	NA
FKBP9_ES_79204	1	NA
FLJ27365_AT_62680	1	NA
FLJ27365_AT_62681	1	NA
FLNB_ES_65420	1	NA
FLT1_AT_25556	1	NA
FLT1_AT_25558	1	NA
FLT3LG_AT_50943	1	NA
FLT3LG_AT_50945	1	NA
FLT4_AT_75015	1	NA
FLT4_AT_75016	1	NA
FNDC3A_AP_25870	1	NA
FNDC3A_AP_25872	1	NA
FNDC5_AT_1641	1	NA
FNDC5_AT_1642	1	NA
FOPNL_ES_34192	1	NA
FOPNL_ES_34207	1	NA
FOXK1_AP_78641	1	NA
FOXK1_AP_78642	1	NA
FOXM1_ES_19721	1	NA
FOXP1_ES_65608	1	NA
FPGT-TNNI3K_AT_3458	1	NA
FRG1_ES_71415	1	NA
FTCDNL1_AT_56723	1	NA
FTCDNL1_AT_56724	1	NA
FUS_ES_268112	1	NA
FUT3_AA_46947	1	NA
FUZ_AD_51083	1	NA
FXYD3_AP_49023	1	NA
FXYD3_AP_49029	1	NA
FXYD3_RI_49035	1	NA
FYN_AP_77269	1	NA
FYN_AP_77272	1	NA
GABRE_AT_90379	1	NA
GABRE_AT_90381	1	NA
GAD1_AT_55906	1	NA
GAD1_AT_55907	1	NA
GALK1_AT_43493	1	NA
GALK1_AT_43494	1	NA
GALK2_ES_30534	1	NA
GALK2_ES_30536	1	NA
GALNT16_AT_28137	1	NA
GALNT16_AT_28139	1	NA
GAREML_AP_52882	1	NA
GAREML_AP_52883	1	NA
GCAT_AT_62155	1	NA
GCAT_AT_62157	1	NA
GEM_AD_84552	1	NA
GFER_AP_33179	1	NA
GFER_AP_33180	1	NA
GGT1_ES_61442	1	NA
GIGYF2_ES_58026	1	NA
GIMAP6_AA_82252	1	NA
GIT2_AA_24375	1	NA
GIT2_ES_24385	1	NA
GJD3_AT_40861	1	NA
GJD3_AT_40862	1	NA
GLS_AP_56586	1	NA
GLS_AP_56587	1	NA
GLT8D1_AP_65249	1	NA
GLT8D1_AP_65250	1	NA
GLUL_RI_9149	1	NA
GMEB2_AP_60138	1	NA
GNB2L1_AD_75066	1	NA
GNG5_RI_3606	1	NA
GOLGA8B_AP_29889	1	NA
GPATCH8_ES_41870	1	NA
GPM6A_AP_71208	1	NA
GPR35_AP_58296	1	NA
GRB10_AP_79711	1	NA
GRB10_ME_79717	1	NA
GRB2_AP_43438	1	NA
GRB2_AP_43439	1	NA
GRIA3_AT_90012	1	NA
GRIA3_AT_90014	1	NA
GRIK2_AT_77096	1	NA
GRIK2_AT_77097	1	NA
GRN_ES_522184	1	NA
GSDMB_ES_40792	1	NA
GTF2IRD1_AP_80080	1	NA
GTF2IRD1_AP_80081	1	NA
GUK1_ES_10191	1	NA
HACE1_ES_77106	1	NA
HAGHL_RI_32971	1	NA
HARS_AP_73719	1	NA
HARS_AP_73720	1	NA
HAUS1_ES_45389	1	NA
HAUS3_ES_68549	1	NA
HAX1_ES_7820	1	NA
HDAC6_RI_89011	1	NA
HDAC9_AP_78887	1	NA
HDLBP_AP_58345	1	NA
HECTD2_AP_12513	1	NA
HECTD2_AP_12514	1	NA
HIGD1A_ES_96334	1	NA
HKR1_AT_49480	1	NA
HKR1_AT_49481	1	NA
HKR1_ES_49492	1	NA
HKR1_ES_49495	1	NA
HM13_ES_58892	1	NA
HMGA1_AD_75774	1	NA
HMGA2_AT_22877	1	NA
HNF1A_AT_24782	1	NA
HNF1A_AT_24784	1	NA
HNRNPA1_ES_212645	1	NA
HNRNPA1_ES_22147	1	NA
HNRNPA2B1_ES_1026936	1	NA
HNRNPA3_AD_56126	1	NA
HNRNPAB_ES_74844	1	NA
HOMER3_AP_48533	1	NA
HOXB3_AP_42193	1	NA
HOXC6_AP_22115	1	NA
HOXC6_AP_22116	1	NA
HP_ES_37535	1	NA
HP1BP3_AP_936	1	NA
HSD11B1L_ES_46899	1	NA
HSD17B1_ES_41059	1	NA
HYAL1_RI_65000	1	NA
HYAL3_AP_64983	1	NA
HYAL3_AP_64984	1	NA
HYDIN_AT_37416	1	NA
HYKK_AT_32096	1	NA
HYKK_AT_32098	1	NA
HYPK_AP_30317	1	NA
IFI27_ES_29078	1	NA
IFI27_ES_29079	1	NA
IFI27_ES_29084	1	NA
IFI27L1_ES_29065	1	NA
IL17RE_AA_63242	1	NA
IL18BP_AD_17485	1	NA
IL18BP_AD_17503	1	NA
IL18BP_RI_17483	1	NA
IL1RL1_AT_54791	1	NA
IL1RL1_AT_54793	1	NA
IL32_ES_33440	1	NA
ILF3_RI_47574	1	NA
IMPDH1_AP_81670	1	NA
IMPDH1_AP_81671	1	NA
INADL_ES_3241	1	NA
ING4_ES_19918	1	NA
INO80C_ES_45189	1	NA
INPP5F_AP_13270	1	NA
INPP5F_AP_13271	1	NA
INPP5F_RI_13276	1	NA
IQSEC2_AP_89209	1	NA
IQSEC2_AP_89210	1	NA
IRF3_ES_51007	1	NA
ITGB1BP1_AP_52612	1	NA
ITGB1BP1_AP_52613	1	NA
ITGB1BP1_ES_100220	1	NA
ITGB1BP1_ES_95415	1	NA
ITGB3BP_ES_3266	1	NA
ITIH5_AT_10715	1	NA
ITIH5_AT_10716	1	NA
JDP2_AP_28500	1	NA
JKAMP_ES_27750	1	NA
KALRN_AP_66518	1	NA
KALRN_AT_66524	1	NA
KARS_ES_37641	1	NA
KATNAL2_AP_45426	1	NA
KATNAL2_AP_45428	1	NA
KATNAL2_AT_45429	1	NA
KATNAL2_AT_45430	1	NA
KCNC4_ES_4100	1	NA
KCTD7_AT_79880	1	NA
KCTD7_AT_79881	1	NA
KHNYN_AD_27003	1	NA
KHNYN_AP_27000	1	NA
KHNYN_AP_27001	1	NA
KIAA1191_ES_97001	1	NA
KIAA1217_AP_10995	1	NA
KIAA1468_ES_107581	1	NA
KIAA1522_AP_1631	1	NA
KIAA1522_AP_1632	1	NA
KIF13A_ES_75458	1	NA
KIF20B_AT_12497	1	NA
KIF20B_AT_12498	1	NA
KIF27_AT_86700	1	NA
KLC1_AT_29467	1	NA
KLC4_RI_76229	1	NA
KLHDC1_ES_27437	1	NA
KLHL24_AT_67804	1	NA
KLHL24_AT_67805	1	NA
KLHL3_AT_73481	1	NA
KLHL3_AT_73482	1	NA
KLK10_AP_51263	1	NA
KLK12_ES_51281	1	NA
KMT2C_AP_82412	1	NA
KMT2C_AP_82413	1	NA
KRT6A_ES_249904	1	NA
KSR1_AP_39847	1	NA
KSR1_AP_39850	1	NA
L3HYPDH_AT_27740	1	NA
L3HYPDH_AT_27741	1	NA
LAMB3_AP_9671	1	NA
LAMB3_AP_9672	1	NA
LARP6_AT_31442	1	NA
LARP6_AT_31443	1	NA
LBH_ES_53112	1	NA
LBX2_AP_54098	1	NA
LBX2_AP_54099	1	NA
LCK_AP_1579	1	NA
LCK_AP_1581	1	NA
LCLAT1_ES_53120	1	NA
LCMT1_ES_35670	1	NA
LEKR1_AD_67374	1	NA
LEPR_AT_3297	1	NA
LETM2_RI_83405	1	NA
LETMD1_ES_21743	1	NA
LETMD1_ES_21747	1	NA
LGALS8_ES_10382	1	NA
LGALS8_RI_10388	1	NA
LGMN_ES_29011	1	NA
LIG1_AD_50689	1	NA
LILRB4_ES_51930	1	NA
LILRB4_ES_51931	1	NA
LILRB5_AA_51850	1	NA
LIMK1_AP_80059	1	NA
LIMK1_AP_80060	1	NA
LIPG_AP_45485	1	NA
LIPG_AP_45486	1	NA
LIPT1_ES_54679	1	NA
LMO7_AP_26060	1	NA
LMO7_AP_26061	1	NA
LONRF1_AP_82748	1	NA
LPAR2_ES_48666	1	NA
LRRC23_ES_20003	1	NA
LRRC69_ME_84428	1	NA
LRRC8A_AP_87787	1	NA
LRRC8A_AP_87788	1	NA
LRRC8D_AP_3726	1	NA
LRRC8D_AP_3727	1	NA
LRRD1_AT_80421	1	NA
LRRD1_AT_80422	1	NA
LSM12_ES_41759	1	NA
LTBP3_ES_137737	1	NA
LUC7L_ES_32844	1	NA
LUC7L_RI_32846	1	NA
LY6K_RI_85358	1	NA
LY9_AT_8500	1	NA
LY9_AT_8502	1	NA
LYST_AP_10360	1	NA
LYST_AP_10361	1	NA
LZTS3_RI_58575	1	NA
MACF1_AP_1872	1	NA
MACF1_AP_1874	1	NA
MAD2L2_ES_665	1	NA
MAFF_AP_62214	1	NA
MAFK_AP_78580	1	NA
MAFK_AP_78581	1	NA
MAP3K4_ES_78357	1	NA
MAP3K4_ES_78359	1	NA
MAP3K8_AP_11120	1	NA
MAP3K8_AP_11121	1	NA
MAP4K4_ES_54757	1	NA
MAPK3_ES_36087	1	NA
MAPK7_AP_39718	1	NA
MAPK7_AP_39719	1	NA
MARCH2_AP_47229	1	NA
MARCH2_AP_47230	1	NA
MARCH3_AT_73177	1	NA
MARCH3_AT_73178	1	NA
MAST4_AP_72276	1	NA
MAST4_AT_72281	1	NA
MAZ_AP_35937	1	NA
MAZ_AP_35938	1	NA
MBNL1_ES_67326	1	NA
MBTD1_AT_42518	1	NA
MBTD1_AT_42519	1	NA
MCCC1_AP_67769	1	NA
MCCC1_AP_67770	1	NA
MCFD2_ES_53478	1	NA
MDH1_ES_53738	1	NA
MDH1B_AA_57152	1	NA
MDK_ES_135487	1	NA
MED1_AT_40644	1	NA
MED1_AT_40646	1	NA
MED11_AT_38577	1	NA
MED11_AT_38578	1	NA
MEGF6_ES_315	1	NA
MESP2_AP_32444	1	NA
MESP2_AP_32445	1	NA
METTL17_RI_26477	1	NA
METTL17_RI_26478	1	NA
METTL21A_AP_57184	1	NA
METTL21A_AP_57188	1	NA
METTL23_AD_43648	1	NA
METTL23_AD_43652	1	NA
METTL23_ES_43643	1	NA
METTL23_ES_43645	1	NA
MFSD11_AD_43690	1	NA
MFSD11_AD_43691	1	NA
MFSD11_RI_43686	1	NA
MFSD11_RI_43689	1	NA
MGLL_AP_66622	1	NA
MGLL_AP_66624	1	NA
MICAL1_AP_77197	1	NA
MICAL1_AP_77198	1	NA
MICAL3_ES_61016	1	NA
MIF4GD_ES_43419	1	NA
MKL1_AP_62348	1	NA
MKL1_AP_62349	1	NA
MKL2_AP_34066	1	NA
MLF1_ME_121012	1	NA
MLF1IP_ES_71315	1	NA
MLK4_AP_10327	1	NA
MLK4_AP_10328	1	NA
MLST8_ES_33219	1	NA
MLST8_ES_33223	1	NA
MMAB_ES_24322	1	NA
MMP19_RI_22274	1	NA
MND1_ES_70870	1	NA
MOAP1_RI_29024	1	NA
MOK_ES_29394	1	NA
MOK_ES_29397	1	NA
MOK_ME_156457	1	NA
MRO_ES_45542	1	NA
MROH6_AP_85423	1	NA
MROH6_AP_85424	1	NA
MRPL35_AA_54420	1	NA
MRPL45_ES_40572	1	NA
MRPL48_AP_17713	1	NA
MRPL48_AP_17714	1	NA
MRPL52_ES_26644	1	NA
MRPL55_ES_10153	1	NA
MRPL55_ES_10166	1	NA
MRPL55_ES_10167	1	NA
MRPL55_RI_10081	1	NA
MRPS28_AP_84264	1	NA
MRPS28_AP_84265	1	NA
MSRB3_ES_22875	1	NA
MST1_RI_64899	1	NA
MTA1_ES_29644	1	NA
MTMR10_RI_29789	1	NA
MTMR8_AT_89314	1	NA
MTMR8_AT_89315	1	NA
MTOR_AP_648	1	NA
MTOR_AP_649	1	NA
MTUS1_AP_82818	1	NA
MUC16_ES_132384	1	NA
MUC16_ES_252123	1	NA
MUC16_ES_252126	1	NA
MVD_ES_38010	1	NA
MVK_ES_24338	1	NA
MX2_AP_60658	1	NA
MX2_AP_60659	1	NA
MXI1_AP_13080	1	NA
MYL12A_ES_44491	1	NA
MYL5_ES_68388	1	NA
MYL6B_RI_22371	1	NA
MYO16_AT_26245	1	NA
MYO16_AT_26246	1	NA
MYO1G_AT_79577	1	NA
MYO1G_AT_79578	1	NA
NAA16_AD_25739	1	NA
NAALADL1_ES_16741	1	NA
NADSYN1_ES_17428	1	NA
NAE1_ES_36876	1	NA
NAE1_ES_36877	1	NA
NAIP_ES_72436	1	NA
NALCN_AT_26202	1	NA
NALCN_AT_26204	1	NA
NAP1L1_AP_23467	1	NA
NAP1L1_AP_23468	1	NA
NARF_ES_44402	1	NA
NASP_ES_2754	1	NA
NAT9_RI_43298	1	NA
NBEA_ES_117489	1	NA
NBPF10_ES_5338	1	NA
NBPF11_ES_7337	1	NA
NBPF11_ES_7342	1	NA
NBPF12_ES_7354	1	NA
NBPF14_ES_155353	1	NA
NCF4_RI_62065	1	NA
NCOA6_AP_59034	1	NA
NCOA6_AP_59035	1	NA
NCOA7_AP_77427	1	NA
NCOA7_AP_77428	1	NA
NDUFA3_AT_51774	1	NA
NDUFA3_AT_51775	1	NA
NDUFA3_AT_51776	1	NA
NDUFAF1_ES_30087	1	NA
NDUFAF6_ES_84597	1	NA
NECAB3_RI_59006	1	NA
NECAP2_ES_823	1	NA
NEDD4L_AP_45651	1	NA
NEIL1_ES_31857	1	NA
NEIL2_ES_82633	1	NA
NEK5_AT_25981	1	NA
NEK5_AT_25982	1	NA
NEU3_AT_17812	1	NA
NFATC2IP_AP_35900	1	NA
NFATC2IP_AP_35902	1	NA
NFIB_ES_85887	1	NA
NFIB_ES_85888	1	NA
NFS1_AT_59212	1	NA
NFS1_AT_59214	1	NA
NFS1_ES_59219	1	NA
NIN_AT_27491	1	NA
NKIRAS2_ES_40978	1	NA
NKIRAS2_ES_40983	1	NA
NKIRAS2_ES_40984	1	NA
NMNAT1_RI_591	1	NA
NOL12_RI_62148	1	NA
NOL8_AD_86866	1	NA
NOP2_ES_19890	1	NA
NPHP1_AT_54927	1	NA
NPHP1_AT_54928	1	NA
NPIPA8_ES_34239	1	NA
NPIPA8_ES_34240	1	NA
NPIPB3_ES_93953	1	NA
NPIPB3_ES_94031	1	NA
NPIPB4_AA_34758	1	NA
NPIPB4_AD_35516	1	NA
NPIPB4_RI_34660	1	NA
NPIPB4_RI_34757	1	NA
NPIPB4_RI_35506	1	NA
NPIPB4_RI_35512	1	NA
NPIPB5_ES_35567	1	NA
NPIPB5_RI_35569	1	NA
NPIPB5_RI_94074	1	NA
NPRL2_ES_65045	1	NA
NPRL2_RI_65037	1	NA
NPTN_ES_31604	1	NA
NR1H3_RI_15704	1	NA
NRCAM_ES_81403	1	NA
NRG1_AT_83312	1	NA
NRG1_AT_83313	1	NA
NRG4_AT_31911	1	NA
NRG4_AT_31913	1	NA
NSRP1_ES_40086	1	NA
NT5C3B_AD_40959	1	NA
NT5E_AT_76916	1	NA
NT5E_AT_76917	1	NA
NTM_AP_19519	1	NA
NTM_AP_19520	1	NA
NUB1_AT_82368	1	NA
NUB1_AT_82369	1	NA
NUDT16L1_RI_33786	1	NA
NUDT16L1_RI_33787	1	NA
NUP62_RI_51127	1	NA
NWD1_AD_48207	1	NA
NXNL2_AT_86786	1	NA
NXNL2_AT_86787	1	NA
NXPE2_AT_18845	1	NA
NXPE2_AT_18846	1	NA
OAS1_AT_24602	1	NA
OBSL1_ES_57732	1	NA
OGFOD2_ES_25009	1	NA
ORMDL1_AP_56533	1	NA
ORMDL1_AP_56534	1	NA
OSBPL5_AP_13950	1	NA
OSBPL5_AP_13951	1	NA
OSBPL6_AT_56150	1	NA
OSBPL6_AT_56151	1	NA
OXLD1_AD_44143	1	NA
OXLD1_AD_44144	1	NA
OXR1_AP_84843	1	NA
PACRGL_ES_68882	1	NA
PACRGL_ES_68904	1	NA
PALLD_AP_71121	1	NA
PALLD_AP_71123	1	NA
PALM_ES_46315	1	NA
PAM_ES_72906	1	NA
PAN3_AP_25550	1	NA
PAN3_AP_25551	1	NA
PANK1_AP_12493	1	NA
PANK1_AP_12494	1	NA
PANK2_AP_58612	1	NA
PANK2_AP_58613	1	NA
PARP3_ES_65116	1	NA
PARP3_ES_65119	1	NA
PBRM1_ES_65237	1	NA
PCBP2_AP_22043	1	NA
PCBP2_AP_22045	1	NA
PCDH1_AT_73831	1	NA
PCDH1_AT_73832	1	NA
PCDH9_AT_26031	1	NA
PCDH9_AT_26032	1	NA
PCDHA1_AT_73765	1	NA
PCDHA1_AT_73766	1	NA
PCDHA13_RI_73786	1	NA
PCDHA2_AT_73770	1	NA
PCDHA3_AT_73771	1	NA
PCDHA3_AT_73772	1	NA
PCGF5_AT_12509	1	NA
PCGF5_AT_12510	1	NA
PCLO_AT_80263	1	NA
PCNP_ES_65959	1	NA
PCYT2_ES_44230	1	NA
PDDC1_ES_13748	1	NA
PDE4DIP_AP_4408	1	NA
PDE5A_AP_70466	1	NA
PDK1_AP_55972	1	NA
PDK1_AP_55973	1	NA
PDLIM7_AT_74777	1	NA
PDLIM7_AT_74778	1	NA
PDPR_ES_37333	1	NA
PDXK_ES_192507	1	NA
PDZD7_AT_12864	1	NA
PEX10_ES_269	1	NA
PFKM_AD_21421	1	NA
PGLS_ES_252394	1	NA
PGRMC2_AP_70572	1	NA
PHF12_RI_40027	1	NA
PHF19_AP_87399	1	NA
PHF19_AP_87400	1	NA
PHF19_AT_87401	1	NA
PHF19_AT_87402	1	NA
PHLDB2_AP_66057	1	NA
PIAS3_AP_7288	1	NA
PIAS3_AP_7289	1	NA
PIGQ_AP_32898	1	NA
PIGQ_AP_32900	1	NA
PIWIL4_AP_18357	1	NA
PKMYT1_AP_33325	1	NA
PKMYT1_AP_33326	1	NA
PLA2G10_ES_34100	1	NA
PLA2G2A_ES_918	1	NA
PLAGL1_AA_78005	1	NA
PLAGL1_AA_78007	1	NA
PLAGL1_ES_78017	1	NA
PLAGL1_RI_78001	1	NA
PLB1_ES_53066	1	NA
PLCB2_AD_29970	1	NA
PLCB2_RI_29968	1	NA
PLCD4_ES_57506	1	NA
PLCE1_AT_12578	1	NA
PLCE1_AT_12579	1	NA
PLD3_ES_49888	1	NA
PLEKHG4_RI_37003	1	NA
PLEKHH2_ES_53393	1	NA
PLEKHM1_ES_41976	1	NA
PLGLB1_AT_54462	1	NA
PLXNC1_AP_23719	1	NA
PLXNC1_AP_23721	1	NA
PMF1_ES_8200	1	NA
PMF1_ES_8202	1	NA
PMP22_AP_39340	1	NA
PMP22_AP_39341	1	NA
PNKP_AP_51101	1	NA
PNKP_AP_51102	1	NA
PNPLA3_AT_62600	1	NA
PNPLA3_AT_62601	1	NA
PODNL1_ES_95018	1	NA
POLL_RI_12905	1	NA
POLM_ES_79459	1	NA
POLR2F_AT_62179	1	NA
POLR2F_AT_62180	1	NA
POLR2G_AD_16418	1	NA
POLR2G_RI_16420	1	NA
POLR2H_ES_67947	1	NA
POM121_AP_79925	1	NA
POM121_AP_79926	1	NA
POMT1_AD_87937	1	NA
PPARD_AT_75907	1	NA
PPARD_AT_75908	1	NA
PPM1M_AP_65190	1	NA
PPM1M_AP_65191	1	NA
PPP1R12B_AP_9411	1	NA
PPP1R12B_AP_9412	1	NA
PPP1R14A_AP_49593	1	NA
PPP1R14A_AP_49594	1	NA
PPP2R4_ES_87853	1	NA
PPP2R5C_AP_29313	1	NA
PPP2R5C_AP_29314	1	NA
PQLC1_ES_46266	1	NA
PQLC3_ES_52673	1	NA
PRDM1_AP_77110	1	NA
PRDM1_AP_77111	1	NA
PRDM15_RI_60682	1	NA
PRDM2_ES_724	1	NA
PREPL_AD_53451	1	NA
PREPL_ES_53440	1	NA
PREPL_ES_53447	1	NA
PRIMPOL_AA_71310	1	NA
PRKAB1_AP_24704	1	NA
PRKAB1_AP_24705	1	NA
PRKRIP1_ES_97667	1	NA
PRMT2_ES_60961	1	NA
PRR13_AA_22036	1	NA
PRR13_AA_22039	1	NA
PRR23C_RI_67029	1	NA
PRSS27_AT_33295	1	NA
PRSS27_AT_33296	1	NA
PSMB5_ES_26691	1	NA
PSMD13_AA_13632	1	NA
PSME3_AP_41143	1	NA
PSME3_AP_41144	1	NA
PSMG4_AT_75171	1	NA
PTBP2_ES_3832	1	NA
PTCH1_AP_86955	1	NA
PTGER3_AT_3412	1	NA
PTOV1_RI_51096	1	NA
PTPN4_AP_55140	1	NA
PTPN4_AP_55141	1	NA
PTPRM_AP_44565	1	NA
PTPRM_AP_44566	1	NA
PTPRS_ES_46841	1	NA
PUS10_AP_53672	1	NA
PUS10_AP_53673	1	NA
PVRL3_AT_66044	1	NA
PVRL3_AT_66045	1	NA
QSER1_AP_14864	1	NA
QSER1_AP_14865	1	NA
RAB11FIP1_AP_83362	1	NA
RAB11FIP1_AP_83363	1	NA
RAB1A_ES_53789	1	NA
RAB3D_AP_47651	1	NA
RAB3D_AP_47652	1	NA
RAB5C_ES_41014	1	NA
RABEP2_ES_35894	1	NA
RABGAP1_AP_87493	1	NA
RABGAP1_AP_87495	1	NA
RABL2B_ES_62925	1	NA
RAD52_ES_19643	1	NA
RALGDS_AP_88012	1	NA
RALGDS_AP_88013	1	NA
RALGPS1_AT_87608	1	NA
RALGPS1_AT_87611	1	NA
RANBP3_ES_46996	1	NA
RANBP3_ES_46999	1	NA
RANBP3_ES_47007	1	NA
RAP1B_ES_22943	1	NA
RASGEF1A_AP_11319	1	NA
RBM14_ES_17079	1	NA
RBM5_AD_64958	1	NA
RBM5_ES_64959	1	NA
RBM6_ES_64939	1	NA
RBM6_ES_64948	1	NA
RBPMS2_AP_31131	1	NA
RBPMS2_AP_31132	1	NA
RDH5_AA_22237	1	NA
REEP5_ES_72992	1	NA
REPIN1_ES_82240	1	NA
RGMA_AP_32564	1	NA
RGMB_AP_72880	1	NA
RGMB_AP_72881	1	NA
RHBDF1_AD_124991	1	NA
RHBDL2_AP_1860	1	NA
RHNO1_ES_19725	1	NA
RHOC_AA_4235	1	NA
RHOH_AP_69084	1	NA
RHOH_AP_69085	1	NA
RLN2_ES_85787	1	NA
RNASE4_ES_26460	1	NA
RNF146_AD_77455	1	NA
RNF146_ES_77451	1	NA
RNF166_AP_38012	1	NA
RNF166_AP_38014	1	NA
RNF180_AT_72195	1	NA
RNF180_AT_72196	1	NA
RNF44_AP_74655	1	NA
RNF44_AP_74656	1	NA
RNF6_AP_25512	1	NA
RNGTT_AT_76981	1	NA
RNGTT_AT_76982	1	NA
RNH1_AA_13675	1	NA
RNPC3_AA_3907	1	NA
ROR2_AP_86825	1	NA
ROR2_AP_86826	1	NA
RPE_ES_57239	1	NA
RPE_ES_57242	1	NA
RPL13_AD_392312	1	NA
RPL27A_AA_14257	1	NA
RPL31_RI_54735	1	NA
RPL35A_ES_102697	1	NA
RPL37A_RI_57422	1	NA
RPL5_ES_127918	1	NA
RPS15_RI_46490	1	NA
RPS15_RI_46491	1	NA
RPS16_ES_95199	1	NA
RPS20_RI_83890	1	NA
RPS21_AA_60075	1	NA
RPS3_ES_17853	1	NA
RPS6KA5_ES_28834	1	NA
RPS9_AA_51822	1	NA
RQCD1_AT_57493	1	NA
RQCD1_AT_57495	1	NA
RQCD1_ES_57497	1	NA
RRNAD1_RI_8313	1	NA
RUFY1_AP_74893	1	NA
RUFY1_AP_74894	1	NA
RUVBL2_ES_50861	1	NA
RUVBL2_ES_50869	1	NA
RWDD3_ES_91022	1	NA
S100PBP_AT_1635	1	NA
S100PBP_AT_1636	1	NA
SAT1_AD_120574	1	NA
SAT1_AD_88699	1	NA
SCAMP5_ES_31823	1	NA
SCMH1_ES_2054	1	NA
SCMH1_ES_2058	1	NA
SCO2_AP_62846	1	NA
SCO2_AP_62847	1	NA
SCOC_AP_70647	1	NA
SCRN2_RI_42120	1	NA
SDC1_AP_52759	1	NA
SDC1_AP_52760	1	NA
SDHAF2_ES_16226	1	NA
SDHD_ES_18738	1	NA
SDR39U1_AD_27011	1	NA
SDR39U1_AP_27005	1	NA
SDSL_ES_24644	1	NA
SEC14L1_AP_43705	1	NA
SEC31A_ES_69732	1	NA
SERAC1_AT_78254	1	NA
SERAC1_AT_78255	1	NA
SERHL2_ES_62510	1	NA
SERPINB5_AT_45716	1	NA
SERPINB5_AT_45717	1	NA
SESN1_AP_77155	1	NA
SESN1_AP_77156	1	NA
SETD4_RI_60517	1	NA
SETD5_ES_63099	1	NA
SETMAR_ES_63001	1	NA
SFTA3_ES_121940	1	NA
SFTA3_ES_121942	1	NA
SGK2_AP_59441	1	NA
SGK2_AP_59442	1	NA
SGK3_AP_84031	1	NA
SGK3_AP_84032	1	NA
SH2B1_AD_35884	1	NA
SH3BGR_AP_60637	1	NA
SH3BGR_AP_60639	1	NA
SH3BP1_ES_62140	1	NA
SH3BP4_AP_58079	1	NA
SH3BP4_AP_58080	1	NA
SH3GLB2_ES_87814	1	NA
SH3KBP1_AP_88642	1	NA
SH3YL1_AP_52495	1	NA
SH3YL1_ES_52502	1	NA
SHF_AP_30407	1	NA
SHF_AP_30409	1	NA
SHROOM4_RI_89142	1	NA
SIAH1_AP_36340	1	NA
SIMC1_ES_74640	1	NA
SIN3B_ES_48216	1	NA
SIPA1_AP_16889	1	NA
SIRT2_ES_49711	1	NA
SLC11A2_AP_21724	1	NA
SLC12A8_AP_66544	1	NA
SLC12A8_AP_66545	1	NA
SLC16A3_AP_44301	1	NA
SLC16A5_AP_43347	1	NA
SLC16A5_AP_43350	1	NA
SLC25A25_AP_87692	1	NA
SLC25A29_AP_29249	1	NA
SLC25A29_AP_29250	1	NA
SLC35A3_ES_3864	1	NA
SLC35D1_AT_3346	1	NA
SLC35D1_AT_3347	1	NA
SLC35E4_AT_61791	1	NA
SLC35E4_AT_61792	1	NA
SLC39A3_AT_46619	1	NA
SLC39A3_AT_46620	1	NA
SLC3A2_ES_16469	1	NA
SLC4A8_AT_21856	1	NA
SLC52A2_AD_85580	1	NA
SLC52A2_ES_136797	1	NA
SLC5A6_AP_52946	1	NA
SLC5A6_AP_52948	1	NA
SLC8B1_AP_24633	1	NA
SLC8B1_AP_24636	1	NA
SLCO4A1_AD_102833	1	NA
SLCO4A1_RI_60081	1	NA
SLMAP_AP_65389	1	NA
SLMAP_AP_65390	1	NA
SLMAP_ES_65407	1	NA
SLMO1_ES_44689	1	NA
SMARCA4_AP_47607	1	NA
SMARCA4_AP_47608	1	NA
SMARCAD1_AP_69959	1	NA
SMC2_AP_87096	1	NA
SMC2_AP_87097	1	NA
SMG6_AP_38382	1	NA
SMG6_AP_38383	1	NA
SMYD5_AA_53954	1	NA
SNCAIP_ES_73103	1	NA
SNRK_ES_64344	1	NA
SNRNP200_ES_54521	1	NA
SNRNP200_ES_563710	1	NA
SNRNP70_AD_50885	1	NA
SNRPD2_ES_50511	1	NA
SOGA2_AP_44571	1	NA
SOGA2_AP_44572	1	NA
SORBS1_ES_12636	1	NA
SOS1_ES_53315	1	NA
SOX30_AP_74390	1	NA
SOX30_AP_74391	1	NA
SPAG9_ES_42494	1	NA
SPATA7_ES_28701	1	NA
SPDL1_ES_74478	1	NA
SPHK1_AD_43585	1	NA
SPINK1_AT_73963	1	NA
SPINK1_AT_73964	1	NA
SRD5A1_ES_71518	1	NA
SSH2_AT_40060	1	NA
SSH2_AT_40062	1	NA
ST3GAL6_AP_65789	1	NA
ST6GALNAC6_ES_87684	1	NA
STAG2_AP_90029	1	NA
STAG2_AP_90030	1	NA
STARD10_AP_17643	1	NA
STARD10_AP_17644	1	NA
STAU1_ES_59743	1	NA
STAU2_AT_84155	1	NA
STEAP3_ME_95656	1	NA
STK11IP_AD_57739	1	NA
STK32C_AP_13486	1	NA
STYXL1_AD_80157	1	NA
SULF2_AD_59730	1	NA
SULT1A3_AP_94136	1	NA
SULT1A4_AD_94118	1	NA
SUMF2_ES_79801	1	NA
SUMF2_ES_79806	1	NA
SUN2_AP_62257	1	NA
SUOX_ES_22340	1	NA
SUPT3H_AT_76393	1	NA
SUPT3H_AT_76394	1	NA
SUPT4H1_AD_42665	1	NA
SUV420H1_AT_17293	1	NA
SUV420H1_AT_17294	1	NA
SYNC_ES_1630	1	NA
SYNE1_ES_78184	1	NA
SYNE1_RI_78201	1	NA
SYNGR1_AT_62298	1	NA
SYNGR1_AT_62299	1	NA
SYT17_RI_34295	1	NA
TACC1_ES_83470	1	NA
TACC2_ES_13341	1	NA
TADA2B_AP_68732	1	NA
TADA2B_AP_68733	1	NA
TAF1D_AA_18315	1	NA
TAF1D_RI_18314	1	NA
TANK_ES_55744	1	NA
TAZ_ES_90593	1	NA
TBC1D10A_AP_61714	1	NA
TBC1D10A_AP_61715	1	NA
TBC1D10C_AD_17191	1	NA
TBC1D22A_AP_62719	1	NA
TBC1D22A_AP_62720	1	NA
TBC1D22A_ES_62731	1	NA
TBC1D3_AP_40562	1	NA
TBC1D3F_AA_40558	1	NA
TBC1D9B_AP_74987	1	NA
TBC1D9B_AP_74988	1	NA
TCEAL7_AA_89727	1	NA
TCF20_ES_62501	1	NA
TCF4_AP_45601	1	NA
TCP11L1_AD_14881	1	NA
TCTN1_AT_24458	1	NA
TCTN1_AT_24461	1	NA
TCTN1_ES_24468	1	NA
TDP1_AP_28806	1	NA
TDRD1_AT_13191	1	NA
TDRD1_AT_13192	1	NA
TEAD2_AP_50918	1	NA
TET2_AD_70190	1	NA
TET2_AP_70185	1	NA
TET2_AP_70186	1	NA
TEX264_ES_65103	1	NA
TEX9_AT_30756	1	NA
TFEB_AP_76118	1	NA
TFEB_AP_76122	1	NA
TGFBR3_AP_3741	1	NA
TGFBR3_ES_3746	1	NA
THEMIS_ES_77489	1	NA
THEMIS2_ES_1352	1	NA
TIA1_ES_53874	1	NA
TIA1_ES_53875	1	NA
TIMM17B_AA_89018	1	NA
TIMM23B_ES_11532	1	NA
TIMMDC1_ES_66310	1	NA
TIPRL_AT_8901	1	NA
TIPRL_AT_8902	1	NA
TLE2_ES_46651	1	NA
TMBIM4_ES_22898	1	NA
TMC6_AT_43757	1	NA
TMC6_AT_43758	1	NA
TMC7_AT_34279	1	NA
TMC7_AT_34280	1	NA
TMCC1_AP_66747	1	NA
TMCC1_AP_66750	1	NA
TMEM101_AD_41755	1	NA
TMEM107_ES_39114	1	NA
TMEM107_ES_39129	1	NA
TMEM107_ES_39130	1	NA
TMEM107_RI_39110	1	NA
TMEM139_RI_82089	1	NA
TMEM145_AT_50151	1	NA
TMEM145_AT_50152	1	NA
TMEM150A_AP_54297	1	NA
TMEM150A_AP_54299	1	NA
TMEM177_AD_55138	1	NA
TMEM180_ES_12955	1	NA
TMEM198_AP_57722	1	NA
TMEM198_AP_57723	1	NA
TMEM205_RI_47673	1	NA
TMEM256-PLSCR3_RI_38940	1	NA
TMEM33_RI_69133	1	NA
TMEM51_AP_736	1	NA
TMEM51_AP_737	1	NA
TMEM63A_AP_10000	1	NA
TMEM63A_AP_9999	1	NA
TMEM63A_ES_10003	1	NA
TMEM67_ES_84538	1	NA
TMEM8B_AT_86320	1	NA
TMEM8B_AT_86321	1	NA
TMEM91_AA_50050	1	NA
TMEM91_RI_50058	1	NA
TMPPE_AA_63840	1	NA
TMSB15B_ES_89791	1	NA
TMSB4X_AD_88498	1	NA
TMUB2_AT_41786	1	NA
TMUB2_AT_41787	1	NA
TMUB2_ES_41814	1	NA
TNFRSF25_AA_424	1	NA
TNFRSF25_ES_430	1	NA
TNFSF13_AP_38969	1	NA
TNFSF13_AP_38970	1	NA
TNFSF4_AP_9015	1	NA
TNFSF4_AP_9016	1	NA
TNIK_AT_67627	1	NA
TNIK_AT_67628	1	NA
TNIK_ES_67629	1	NA
TNK2_AP_68201	1	NA
TNK2_AP_68202	1	NA
TOM1L1_ES_42558	1	NA
TOR2A_AD_87657	1	NA
[truncated: 2,800 more rows]
